# Supplementary material for: The transcriptional response to tumorigenic polarity loss in Drosophila
Source: eLife. 2015 Feb 26;4:e03189. doi: 10.7554/eLife.03189 (PMC4369581; doi:10.7554/eLife.03189)
Supplement: Supplementary file 1. — Transcriptome Analysis of scrib Tissue. Differential expression analysis of scrib versus white RNA-Seq data by DESeq. Each column contains the following information: Flybase ID- Flybase Gene Identifier; Gene Name- Name of each gene; baseMean_allconditions- Average normalized read count for that gene, across all samples, baseMean_white- Normalized read count for that gene in white tissue; baseMean_scribble- Normalized read count for that gene in scrib tissue; foldChange- Change of the gene in scribble, relative to white tissue; foldChangelog2- Logarithm to base 2 of the fold change; pval- p-value for the statistical significance of the fold change; padj- p-value adjusted for multiple testing with the Benjamini-Hochberg procedure, which controls for false discovery rate (FDR). DOI: http://dx.doi.org/10.7554/eLife.03189.021 [file elife03189s001.xlsx]

## Sheet: Scribblevswhite
Flybase ID	Gene Name	baseMean_Allconditions	baseMean_white	baseMean_scribble	foldChange (scrib/white)	log2FoldChange (scrib/white)	pval	padj
FBgn0000003	7SLRNA:CR32864	0	0	0	NA	NA	NA	NA
FBgn0000008	a	2045.46	2385.47	1705.44	0.714929	-0.484128	0.00477798	0.0275753
FBgn0000014	abd-A	1.42467	0.704319	2.14503	3.04553	1.6067	0.181192	0.434383
FBgn0000015	Abd-B	6.34331	3.72414	8.96248	2.40659	1.26699	0.0563444	0.188138
FBgn0000017	Abl	4828.15	4409.23	5247.06	1.19002	0.25098	0.1517	0.386364
FBgn0000018	abo	453.189	417.205	489.173	1.1725	0.229586	0.271136	0.567228
FBgn0000022	ac	0	0	0	NA	NA	NA	NA
FBgn0000024	Ace	9.01311	7.6892	10.337	1.34436	0.426916	0.610576	0.894734
FBgn0000028	acj6	23.6172	33.4115	13.823	0.413719	-1.27328	0.0928937	0.273425
FBgn0000032	Acph-1	1366.61	1327.74	1405.49	1.05855	0.0820945	0.605112	0.892175
FBgn0000036	nAcRalpha-96Aa	17.8033	18.2958	17.3108	0.946166	-0.079835	0.911084	1
FBgn0000037	mAcR-60C	3.26647	2.24613	4.28682	1.90854	0.932469	0.787218	1
FBgn0000038	nAcRbeta-64B	1.70836	1.42648	1.99024	1.39521	0.480481	0.94433	1
FBgn0000039	nAcRalpha-96Ab	0.174183	0	0.348366	Inf	Inf	1	1
FBgn0000042	Act5C	288172	236371	339972	1.4383	0.524363	0.00106644	0.0078208
FBgn0000043	Act42A	0	0	0	NA	NA	NA	NA
FBgn0000044	Act57B	1476.22	1016.4	1936.04	1.90481	0.929643	0.135021	0.355692
FBgn0000045	Act79B	5.4573	4.23758	6.67702	1.57567	0.655965	0.75712	0.99496
FBgn0000046	Act87E	651.636	502.189	801.083	1.59518	0.673722	0.0193977	0.0834952
FBgn0000047	Act88F	18.5169	15.8213	21.2125	1.34076	0.423052	0.566252	0.861357
FBgn0000052	ade2	3768.38	3951.76	3585.01	0.907193	-0.140518	0.376035	0.690082
FBgn0000053	ade3	5960.97	6493.06	5428.88	0.836105	-0.258244	0.10857	0.306944
FBgn0000054	Adf1	3789.1	4356.54	3221.67	0.739501	-0.435377	0.00864642	0.0439501
FBgn0000055	Adh	0	0	0	NA	NA	NA	NA
FBgn0000056	Adhr	0	0	0	NA	NA	NA	NA
FBgn0000057	adp	968.739	900.578	1036.9	1.15137	0.203352	0.302055	0.605435
FBgn0000061	al	1421.47	2573.14	269.797	0.104851	-3.25359	1.30855e-22	1.0763e-20
FBgn0000063	ald	912.574	1039.69	785.459	0.755476	-0.404543	0.0319478	0.12344
FBgn0000064	Ald	14646.6	10682.6	18610.5	1.74213	0.800854	0.000115609	0.00112875
FBgn0000071	Ama	8021.83	8446.76	7596.9	0.899386	-0.152988	0.315832	0.622385
FBgn0000075	amd	788.23	1091.01	485.447	0.444951	-1.16828	1.22693e-06	1.8265e-05
FBgn0000077	amx	229.187	171.415	286.96	1.67406	0.743353	0.00408041	0.0241467
FBgn0000078	Amy-d	7.13409	0.310295	13.9579	44.9826	5.4913	0.00197901	0.0130635
FBgn0000079	Amy-p	18.2338	0.86151	35.6062	41.3299	5.36911	4.33221e-05	0.000465509
FBgn0000083	AnnIX	17321.7	12168.7	22474.7	1.84693	0.885126	3.20896e-08	6.05413e-07
FBgn0000084	AnnX	1143.93	436.342	1851.51	4.24325	2.08517	1.8093e-13	6.67282e-12
FBgn0000092	CG2650	12.3125	12.5295	12.0955	0.965359	-0.0508619	0.964408	1
FBgn0000094	Anp	0	0	0	NA	NA	NA	NA
FBgn0000097	aop	9860.99	8286.46	11435.5	1.38003	0.464695	0.00439773	0.0256658
FBgn0000099	ap	13564.8	18907.2	8222.36	0.43488	-1.20131	8.32306e-14	3.19321e-12
FBgn0000100	RpLP0	83273.6	84094	82453.1	0.980486	-0.0284307	0.919559	1
FBgn0000108	Appl	277.87	222.155	333.586	1.50159	0.586495	0.023528	0.0965872
FBgn0000109	Aprt	450.785	379.318	522.251	1.37682	0.461335	0.0482359	0.167522
FBgn0000114	aret	136.515	131.079	141.952	1.08295	0.114965	0.615777	0.898901
FBgn0000115	Arf72A	1973.55	1637.26	2309.84	1.41079	0.496506	0.00494729	0.0283663
FBgn0000116	Argk	15289.3	21858.2	8720.29	0.398948	-1.32573	2.91712e-08	5.55857e-07
FBgn0000117	arm	42003.4	44461.6	39545.3	0.889426	-0.169054	0.286577	0.588277
FBgn0000119	arr	11011.1	14488.1	7534.05	0.520016	-0.943371	4.96666e-09	1.06937e-07
FBgn0000120	Arr1	1.05781	1.18556	0.930054	0.784485	-0.350182	1	1
FBgn0000121	Arr2	0	0	0	NA	NA	NA	NA
FBgn0000137	ase	0	0	0	NA	NA	NA	NA
FBgn0000139	ash2	2596.54	2420.33	2772.76	1.14561	0.196119	0.238473	0.52201
FBgn0000140	asp	6244.34	7359.38	5129.3	0.696974	-0.520824	0.00683906	0.0368564
FBgn0000146	aub	87.3592	123.298	51.42	0.417037	-1.26175	0.123166	0.333292
FBgn0000147	aur	1319.8	1679.14	960.455	0.571994	-0.805928	9.1835e-06	0.000115379
FBgn0000150	awd	29490.3	32642.6	26337.9	0.806857	-0.309615	0.061828	0.200839
FBgn0000152	Axs	858.249	702.328	1014.17	1.44401	0.530081	0.00593483	0.0330303
FBgn0000153	b	275.412	118.491	432.332	3.64865	1.86736	4.8614e-11	1.37575e-09
FBgn0000157	Dll	2240.35	3692.53	788.183	0.213454	-2.22801	8.85575e-15	3.73608e-13
FBgn0000158	bam	65.3249	98.2486	32.4011	0.329787	-1.6004	0.0660771	0.210787
FBgn0000163	baz	5543.41	4879.9	6206.92	1.27194	0.347026	0.0566528	0.188782
FBgn0000166	bcd	0	0	0	NA	NA	NA	NA
FBgn0000173	ben	10981.1	11153.6	10808.5	0.96906	-0.0453427	0.752235	0.992424
FBgn0000179	bi	0	0	0	NA	NA	NA	NA
FBgn0000180	bib	3064.1	3681.94	2446.26	0.664394	-0.589889	0.039463	0.145052
FBgn0000181	bic	45886.7	42308.4	49465.1	1.16915	0.225466	0.13892	0.362619
FBgn0000182	BicC	0.910904	0.606835	1.21497	2.00215	1.00155	0.886487	1
FBgn0000183	BicD	4239.1	4208.17	4270.02	1.0147	0.0210493	0.895678	1
FBgn0000206	boss	0.287671	0.310295	0.265046	0.854174	-0.227397	1	1
FBgn0000210	br	68033.2	93791.4	42275.1	0.450736	-1.14965	6.04327e-06	7.89631e-05
FBgn0000212	brm	14538.5	17485.1	11592	0.662964	-0.592998	0.000195015	0.00178798
FBgn0000216	Brd	484.858	404.933	564.783	1.39476	0.480013	0.0465882	0.163619
FBgn0000221	brn	372.841	306.548	439.134	1.43251	0.518546	0.0264173	0.106363
FBgn0000227	Bsg25A	0	0	0	NA	NA	NA	NA
FBgn0000228	Bsg25D	2082.85	2022.85	2142.85	1.05932	0.0831417	0.664169	0.935268
FBgn0000229	bsk	2836.52	2665.67	3007.37	1.12819	0.174007	0.30328	0.606713
FBgn0000233	btd	12.4009	17.2946	7.50712	0.434073	-1.20399	0.00716589	0.0380175
FBgn0000239	bur	5910.54	6150.17	5670.92	0.922074	-0.117045	0.459055	0.771038
FBgn0000241	bw	10.2493	11.9947	8.50386	0.70897	-0.496203	0.771055	1
FBgn0000242	Bx	4011.94	5845.23	2178.65	0.372722	-1.42383	4.32476e-05	0.000465291
FBgn0000244	by	2740.39	1916.72	3564.05	1.85945	0.894877	0.000336548	0.00290396
FBgn0000246	c(3)G	389.717	506.143	273.29	0.539947	-0.88911	0.000277179	0.00242834
FBgn0000247	ca	2070.27	2310.72	1829.82	0.791885	-0.336638	0.0490278	0.169551
FBgn0000250	cact	4770.06	4969.67	4570.44	0.919667	-0.120817	0.497989	0.80485
FBgn0000251	cad	2.78988	3.37607	2.20369	0.652738	-0.615424	0.555855	0.853316
FBgn0000253	Cam	46746.4	40760.8	52732.1	1.2937	0.371499	0.021683	0.0910063
FBgn0000256	capu	3800.08	4997.85	2602.31	0.520686	-0.941516	2.5123e-08	4.82742e-07
FBgn0000257	car	1077.33	958.457	1196.2	1.24805	0.319675	0.0868083	0.26111
FBgn0000258	CkIIalpha	8557.43	9021.77	8093.09	0.897062	-0.156721	0.335536	0.645387
FBgn0000259	CkIIbeta	10894.3	12104.8	9683.74	0.799993	-0.321941	0.0492939	0.170162
FBgn0000261	Cat	6847.33	9255.75	4438.91	0.479584	-1.06015	2.19419e-09	4.96755e-08
FBgn0000273	Pka-C1	6344.73	6824.76	5864.7	0.859326	-0.218723	0.164574	0.408591
FBgn0000274	Pka-C2	0.409823	0.819646	0	0	#NAME?	0.760731	0.996677
FBgn0000276	CecA1	2.88138	0.310295	5.45247	17.5719	4.1352	0.252034	0.540214
FBgn0000277	CecA2	3.56481	0.958995	6.17063	6.43448	2.68582	0.101988	0.292778
FBgn0000278	CecB	5.22077	0.310295	10.1312	32.6503	5.02903	0.0105137	0.0514787
FBgn0000279	CecC	3.22186	1.66331	4.7804	2.87402	1.52307	0.334633	0.644193
FBgn0000280	Cec-Psi1	0	0	0	NA	NA	NA	NA
FBgn0000281	Cec2	0	0	0	NA	NA	NA	NA
FBgn0000283	Cp190	11590.8	13132.9	10048.7	0.765153	-0.38618	0.0134727	0.0627727
FBgn0000286	Cf2	1438.47	1377.92	1499.01	1.08788	0.121513	0.491721	0.798497
FBgn0000287	salr	7748.07	11091.7	4404.41	0.397089	-1.33247	2.0889e-16	1.02941e-14
FBgn0000289	cg	13052.5	14837.8	11267.3	0.759366	-0.397132	0.0134933	0.0628132
FBgn0000299	Cg25C	5479.44	4233.92	6724.97	1.58836	0.667535	0.088891	0.26535
FBgn0000303	Cha	25.3365	33.3641	17.309	0.518793	-0.946769	0.517877	0.823146
FBgn0000307	chif	0	0	0	NA	NA	NA	NA
FBgn0000308	chic	63397	53285.8	73508.2	1.37951	0.464153	0.00370288	0.0222582
FBgn0000313	chp	312.413	410.015	214.812	0.523913	-0.932602	0.0040082	0.0237809
FBgn0000316	cin	0	0	0	NA	NA	NA	NA
FBgn0000317	ck	5400.93	7040.63	3761.22	0.534217	-0.904502	0.000484568	0.00397422
FBgn0000318	cl	2788.15	2757.45	2818.86	1.02227	0.0317761	0.922828	1
FBgn0000319	Chc	33936.1	34258.6	33613.7	0.981175	-0.0274174	0.927317	1
FBgn0000320	eya	1378.62	970.528	1786.72	1.84097	0.880468	0.0213815	0.0899061
FBgn0000326	clt	897.009	814.809	979.209	1.20177	0.265155	0.163387	0.406972
FBgn0000330	cm	1419.93	1301.52	1538.34	1.18196	0.241186	0.173306	0.422114
FBgn0000337	cn	9.95438	2.73763	17.1711	6.27224	2.64898	0.0238996	0.0977267
FBgn0000339	cni	1783.57	1461.74	2105.4	1.44033	0.526401	0.002653	0.0167764
FBgn0000346	comt	700.68	551.154	850.205	1.54259	0.625357	0.000877166	0.00661956
FBgn0000351	cort	283.338	384.292	182.384	0.474599	-1.07522	0.000379205	0.00322578
FBgn0000352	cos	4016.97	4605.58	3428.37	0.744395	-0.425859	0.00822992	0.0424798
FBgn0000355	Cp15	15.8267	8.02202	23.6315	2.94582	1.55867	0.102359	0.293521
FBgn0000356	Cp16	0.265046	0	0.530092	Inf	Inf	0.943122	1
FBgn0000357	Cp18	49.0401	63.5589	34.5212	0.543137	-0.880611	0.617066	0.899388
FBgn0000358	Cp19	1.13123	0.62059	1.64187	2.64566	1.40363	0.778149	1
FBgn0000359	Cp36	0	0	0	NA	NA	NA	NA
FBgn0000360	Cp38	0	0	0	NA	NA	NA	NA
FBgn0000363	cpo	42.9402	60.7714	25.109	0.413171	-1.27519	0.00141158	0.00984955
FBgn0000370	crc	51539.8	38476.1	64603.6	1.67906	0.747652	2.14029e-06	3.06257e-05
FBgn0000376	crm	1755.69	1836.8	1674.58	0.911679	-0.133402	0.449779	0.763635
FBgn0000377	crn	2437.73	2727.09	2148.38	0.787793	-0.344112	0.0395439	0.145231
FBgn0000382	csw	3628.02	4101.88	3154.16	0.768954	-0.379031	0.0175666	0.0779105
FBgn0000384	cta	1716.26	1666.81	1765.71	1.05934	0.0831607	0.770771	1
FBgn0000392	cup	450.926	406.797	495.054	1.21696	0.283277	0.224038	0.501062
FBgn0000394	cv	2045.76	1745.11	2346.42	1.34456	0.427138	0.0142531	0.0657346
FBgn0000395	cv-2	4958.22	3438.18	6478.27	1.88422	0.913964	1.24127e-07	2.16003e-06
FBgn0000404	CycA	10862.2	12483.6	9240.79	0.740231	-0.433952	0.00605186	0.0335065
FBgn0000405	CycB	9562.36	10989.7	8134.98	0.740234	-0.433947	0.00702371	0.0375205
FBgn0000406	Cyt-b5-r	5.60211	0.310295	10.8939	35.1083	5.13374	0.0954746	0.279243
FBgn0000409	Cyt-c-p	5236.6	2542.85	7930.36	3.1187	1.64094	1.32901e-22	1.08532e-20
FBgn0000411	D	11.6939	5.68748	17.7002	3.11214	1.63791	0.0413347	0.149693
FBgn0000412	D1	28834.1	35482.8	22185.4	0.625244	-0.677508	1.79837e-05	0.000210434
FBgn0000413	da	4767.41	5048.28	4486.54	0.888727	-0.170188	0.295263	0.598657
FBgn0000414	Dab	5268.87	4854.25	5683.48	1.17082	0.227525	0.177234	0.428486
FBgn0000416	Sap-r	16215.4	14099.2	18331.6	1.30019	0.378719	0.0185101	0.0806808
FBgn0000422	Ddc	506.751	353.584	659.917	1.86636	0.90023	0.272839	0.57006
FBgn0000426	SmF	0	0	0	NA	NA	NA	NA
FBgn0000427	dec-1	0.490825	0	0.981651	Inf	Inf	0.854253	1
FBgn0000439	Dfd	0.940731	0.254675	1.62679	6.38768	2.67529	0.234824	0.516894
FBgn0000442	Pkg21D	0.787595	0	1.57519	Inf	Inf	0.454274	0.767053
FBgn0000447	Dhod	3377.54	3498.28	3256.81	0.930974	-0.103187	0.555538	0.853233
FBgn0000448	Hr46	403.327	776.79	29.8651	0.0384468	-4.70099	0.0058152	0.0325111
FBgn0000449	dib	22.4488	36.7303	8.16734	0.22236	-2.16903	0.0126325	0.0596807
FBgn0000451	ect	87.6382	85.2535	90.0229	1.05594	0.0785325	0.93934	1
FBgn0000454	Dip-B	5365.11	4473.44	6256.78	1.39865	0.484037	0.00289702	0.0180499
FBgn0000455	Dip-C	1151.4	1027.63	1275.18	1.2409	0.311383	0.091481	0.270189
FBgn0000459	disco	124.485	212.867	36.1039	0.169608	-2.55972	8.20048e-27	9.86906e-25
FBgn0000463	Dl	9284.04	11454.3	7113.79	0.62106	-0.687196	1.58874e-05	0.000188816
FBgn0000464	Lar	5017.02	6190.55	3843.5	0.620866	-0.687646	0.00329479	0.0201322
FBgn0000473	Cyp6a2	0	0	0	NA	NA	NA	NA
FBgn0000477	DNaseII	3.82791	3.18728	4.46855	1.40199	0.487481	0.817193	1
FBgn0000479	dnc	1878.73	2357.11	1400.35	0.594097	-0.75123	0.0527893	0.179145
FBgn0000482	dor	1794.58	1897.76	1691.41	0.891264	-0.166075	0.320687	0.627418
FBgn0000489	Pka-C3	610.512	728.908	492.117	0.675143	-0.566735	0.197974	0.463472
FBgn0000490	dpp	5149.04	3419.13	6878.94	2.0119	1.00856	1.35683e-09	3.16585e-08
FBgn0000492	Dr	3403.73	4684.02	2123.43	0.453336	-1.14135	2.02451e-11	6.05921e-10
FBgn0000497	ds	35387.2	44776.3	25998.2	0.580625	-0.784322	0.0108592	0.0527407
FBgn0000499	dsh	2848.36	3181.18	2515.54	0.790758	-0.338692	0.0473419	0.165068
FBgn0000500	Dsk	0	0	0	NA	NA	NA	NA
FBgn0000504	dsx	2030.47	3132.24	928.711	0.296501	-1.75389	5.29044e-08	9.6932e-07
FBgn0000520	dwg	998.915	1065.27	932.559	0.875421	-0.191952	0.277515	0.576774
FBgn0000524	dx	5022.95	6455.68	3590.22	0.556134	-0.846496	2.01444e-07	3.40193e-06
FBgn0000527	e	68.9384	18.0864	119.79	6.62322	2.72753	0.0236329	0.0969133
FBgn0000529	bsh	0.155148	0.310295	0	0	#NAME?	0.998366	1
FBgn0000533	ea	527.939	51.8121	1004.07	19.379	4.27642	2.26081e-41	7.3851e-39
FBgn0000535	eag	4.61327	6.93953	2.28701	0.329563	-1.60138	0.422881	0.738588
FBgn0000536	eas	2427.45	2544.07	2310.82	0.908315	-0.138735	0.384175	0.697762
FBgn0000541	E(bx)	20015.1	23481.5	16548.8	0.704757	-0.504802	0.00121956	0.00876379
FBgn0000542	ec	18114.6	23309.1	12920.2	0.554297	-0.851269	0.000232466	0.00209935
FBgn0000543	ecd	2270.36	2399.24	2141.47	0.892559	-0.16398	0.327784	0.636366
FBgn0000546	EcR	10324.9	9304.53	11345.3	1.21933	0.286092	0.0635698	0.205031
FBgn0000547	ed	32705.2	41390.2	24020.2	0.580335	-0.785043	3.71098e-05	0.000407175
FBgn0000551	Edg78E	4.61463	7.18742	2.04184	0.284084	-1.81561	0.210879	0.481907
FBgn0000552	Edg84A	0	0	0	NA	NA	NA	NA
FBgn0000556	Ef1alpha48D	531331	529007	533655	1.00879	0.0126202	0.907273	1
FBgn0000557	Ef1alpha100E	1177.67	1838.71	516.633	0.280976	-1.83148	0.00180147	0.0120587
FBgn0000559	Ef2b	214335	206667	222003	1.07421	0.103271	0.560141	0.857154
FBgn0000560	eg	172.197	131.608	212.786	1.61682	0.693155	0.0402321	0.146863
FBgn0000562	egl	5874.34	5802.08	5946.6	1.02491	0.0354935	0.805664	1
FBgn0000564	Eh	0.155148	0.310295	0	0	#NAME?	1	1
FBgn0000565	Eip71CD	2453.34	2030.15	2876.54	1.41691	0.502752	0.134885	0.355692
FBgn0000566	Eip55E	2537.49	2810.96	2264.01	0.805423	-0.312182	0.0720887	0.226302
FBgn0000567	Eip74EF	5220.03	5494.97	4945.08	0.899928	-0.152118	0.332011	0.641568
FBgn0000568	Eip75B	10058.1	12834.8	7281.41	0.567316	-0.817775	0.0294398	0.115705
FBgn0000575	emc	17893.8	16839	18948.5	1.12527	0.170275	0.27308	0.570459
FBgn0000576	ems	2550.95	2024.98	3076.91	1.51948	0.603578	0.000460549	0.00382508
FBgn0000577	en	1981.32	3208.06	754.574	0.235212	-2.08796	2.16751e-15	9.6051e-14
FBgn0000578	ena	6285.47	5762.46	6808.49	1.18153	0.240652	0.150525	0.384399
FBgn0000579	Eno	15595.6	15831.6	15359.6	0.970184	-0.04367	0.767312	1
FBgn0000581	E(Pc)	11939.4	13658.7	10220	0.748243	-0.418421	0.00707657	0.0377186
FBgn0000588	esc	0	0	0	NA	NA	NA	NA
FBgn0000591	E(spl)	409.979	525.559	294.399	0.560164	-0.836078	0.0161031	0.0727697
FBgn0000592	Est-6	8.98021	14.4735	3.4869	0.240915	-2.0534	0.0589978	0.194387
FBgn0000594	Est-P	94.9581	95.641	94.2753	0.98572	-0.0207499	0.989537	1
FBgn0000606	eve	0.132523	0	0.265046	Inf	Inf	0.990736	1
FBgn0000611	exd	12264.4	14049.4	10479.3	0.74589	-0.422965	0.0110231	0.0533787
FBgn0000615	exu	121.487	158.292	84.6809	0.534966	-0.902481	0.00851648	0.043546
FBgn0000617	e(y)1	1245.08	1221.35	1268.81	1.03886	0.0549968	0.742874	0.986787
FBgn0000618	e(y)2	932.128	961.066	903.191	0.93978	-0.089605	0.618075	0.900144
FBgn0000625	eyg	1526.78	2121.54	932.017	0.439311	-1.18668	0.000234558	0.00211657
FBgn0000629	E(z)	2324.24	2471.78	2176.7	0.88062	-0.183409	0.308525	0.613241
FBgn0000633	fas	23.2871	29.0048	17.5694	0.605741	-0.723226	0.220502	0.496065
FBgn0000635	Fas2	15251.6	12586.1	17917	1.42356	0.509499	0.00252094	0.0160657
FBgn0000636	Fas3	29970.2	39034.9	20905.4	0.535557	-0.900889	1.9122e-08	3.73075e-07
FBgn0000639	Fbp1	352.47	568.73	136.211	0.2395	-2.06191	0.382345	0.696186
FBgn0000640	Fbp2	97.0721	72.9427	121.202	1.6616	0.732574	0.784876	1
FBgn0000644	Fcp3C	49.5777	61.4848	37.6705	0.61268	-0.706794	0.146007	0.375714
FBgn0000658	fj	20600.5	11502.7	29698.2	2.58185	1.36841	1.74037e-15	7.89588e-14
FBgn0000659	fkh	1.61148	3.22296	0	0	#NAME?	0.00225129	0.0146912
FBgn0000662	fl(2)d	5502.24	5968.89	5035.59	0.84364	-0.2453	0.131098	0.34938
FBgn0000667	Actn	8335.58	10317.6	6353.6	0.615804	-0.699456	1.61337e-05	0.000191345
FBgn0000709	fliI	2889.06	2519.55	3258.57	1.29331	0.371073	0.0288251	0.113837
FBgn0000711	flw	3201.26	3417.12	2985.41	0.873663	-0.19485	0.25849	0.54901
FBgn0000715	Fmrf	1.3273	2.38956	0.265046	0.110918	-3.17243	0.51276	0.818884
FBgn0000719	fog	596.798	838.236	355.36	0.423938	-1.23807	5.0586e-06	6.70163e-05
FBgn0000721	for	4193.66	5025.63	3361.69	0.668909	-0.580119	0.000511474	0.00416799
FBgn0000723	Fps85D	4939.28	6262.05	3616.51	0.577529	-0.792035	0.0120579	0.0573174
FBgn0000808	gd	70.4729	47.4875	93.4582	1.96806	0.976773	0.0594864	0.195496
FBgn0000810	fs(1)K10	1673.9	1741.22	1606.58	0.922675	-0.116105	0.55997	0.857046
FBgn0000826	png	66.6086	48.8865	84.3307	1.72503	0.786621	0.106383	0.302418
FBgn0000927	fs(1)Ya	3.05456	4.61725	1.49187	0.323108	-1.62991	0.576021	0.869126
FBgn0000928	fs(1)Yb	28.8377	34.4908	23.1847	0.672199	-0.57304	0.284285	0.585583
FBgn0000964	tj	0.313469	0.310295	0.316642	1.02046	0.0292142	1	1
FBgn0000996	dup	3203.96	3447.56	2960.35	0.858681	-0.219806	0.20188	0.468364
FBgn0001075	ft	35798.1	31744.8	39851.3	1.25536	0.328107	0.452809	0.765823
FBgn0001077	ftz	0	0	0	NA	NA	NA	NA
FBgn0001078	ftz-f1	3123.97	1973.8	4274.15	2.16545	1.11466	3.49335e-05	0.000386262
FBgn0001079	fu	1221.45	1369.3	1073.6	0.78405	-0.350983	0.0609674	0.198813
FBgn0001083	fw	2536.55	2757.39	2315.71	0.839822	-0.251844	0.135115	0.355692
FBgn0001084	fy	857.207	963.812	750.602	0.778784	-0.360705	0.0492098	0.170029
FBgn0001085	fz	7079.53	9240.64	4918.42	0.532259	-0.909799	6.49476e-07	1.01858e-05
FBgn0001086	fzy	4208.35	4829.33	3587.36	0.742827	-0.428902	0.0106159	0.0518683
FBgn0001087	g	3921.69	4373.46	3469.93	0.793406	-0.333868	0.0358341	0.134985
FBgn0001089	Gal	276.15	155.655	396.645	2.54824	1.3495	0.156183	0.39418
FBgn0001090	bnb	0	0	0	NA	NA	NA	NA
FBgn0001091	Gapdh1	8379.21	7426.72	9331.71	1.2565	0.329416	0.0381255	0.141339
FBgn0001092	Gapdh2	22138.7	23021.9	21255.6	0.923279	-0.115161	0.455202	0.767583
FBgn0001098	Gdh	11122	10420.3	11823.7	1.13468	0.182284	0.373945	0.687791
FBgn0001099	gdl	0	0	0	NA	NA	NA	NA
FBgn0001104	G-ialpha65A	10840.3	9971.71	11708.9	1.17421	0.231693	0.149686	0.382598
FBgn0001105	Gbeta13F	9790.35	9112.94	10467.8	1.14867	0.199965	0.27392	0.571693
FBgn0001108	Gl	4590.2	4000.64	5179.77	1.29473	0.372657	0.0246721	0.100429
FBgn0001112	Gld	462.704	750.937	174.47	0.232337	-2.10571	1.26307e-08	2.53346e-07
FBgn0001114	Glt	1849.23	1215.37	2483.08	2.04306	1.03073	0.0450549	0.159675
FBgn0001120	gnu	8.21399	12.7959	3.63211	0.28385	-1.8168	0.234314	0.516267
FBgn0001122	G-oalpha47A	2780.5	2558.42	3002.58	1.17361	0.230952	0.174971	0.424628
FBgn0001123	G-salpha60A	5970.33	5801.03	6139.63	1.05837	0.0818437	0.629612	0.910039
FBgn0001124	Got1	4426.45	4773.33	4079.57	0.854659	-0.226579	0.167355	0.412418
FBgn0001125	Got2	4949.98	4904.64	4995.32	1.01849	0.0264317	0.841109	1
FBgn0001128	Gpdh	860.269	762.606	957.931	1.25613	0.328983	0.0778677	0.240222
FBgn0001133	grau	875.532	862.091	888.973	1.03118	0.0442995	0.86826	1
FBgn0001134	Grd	12.7265	13.367	12.0859	0.90416	-0.14535	0.918542	1
FBgn0001137	grk	567.117	678.138	456.096	0.67257	-0.572244	0.00920671	0.0461466
FBgn0001138	grn	5946.78	6489.41	5404.16	0.832765	-0.264018	0.137404	0.359976
FBgn0001139	gro	13054.1	14894	11214.1	0.752929	-0.409414	0.0100086	0.0495574
FBgn0001142	Gs1	0	0	0	NA	NA	NA	NA
FBgn0001145	Gs2	319.281	524.292	114.269	0.21795	-2.19793	3.15817e-08	5.98795e-07
FBgn0001147	gsb-n	5.30847	3.49697	7.11996	2.03604	1.02576	0.240583	0.52482
FBgn0001148	gsb	5.52793	2.99171	8.06415	2.6955	1.43055	0.0625501	0.202645
FBgn0001149	GstD1	44328.1	32821.3	55835	1.70118	0.766537	1.91348e-06	2.77272e-05
FBgn0001150	gt	49.8636	70.1497	29.5775	0.421634	-1.24594	0.0155004	0.0704635
FBgn0001168	h	4272.72	3921.77	4623.67	1.17898	0.237533	0.152747	0.388425
FBgn0001169	H	5759.08	6825.68	4692.48	0.687474	-0.540623	0.000754417	0.00580434
FBgn0001170	H2.0	100.474	137.36	63.5876	0.462927	-1.11114	0.000643074	0.00508807
FBgn0001174	halo	0.456668	0.56497	0.348366	0.616609	-0.697572	1	1
FBgn0001179	hay	0	0	0	NA	NA	NA	NA
FBgn0001180	hb	1.28304	2.56609	0	0	#NAME?	0.299009	0.602803
FBgn0001185	her	1375.23	1451.4	1299.06	0.895042	-0.159972	0.326189	0.634148
FBgn0001186	Hex-A	5388.67	4215.98	6561.36	1.55631	0.638129	0.00135841	0.00953391
FBgn0001187	Hex-C	0	0	0	NA	NA	NA	NA
FBgn0001189	hfw	2324.63	2349.44	2299.83	0.978887	-0.0307856	0.86275	1
FBgn0001197	His2Av	23153.9	23495.8	22812	0.970896	-0.0426111	0.823227	1
FBgn0001202	hk	1724.54	1530.72	1918.36	1.25324	0.325668	0.0605534	0.198142
FBgn0001206	Hmr	1764.17	1915.83	1612.5	0.841671	-0.248672	0.166455	0.410857
FBgn0001208	Hn	95.4384	178.033	12.8438	0.0721429	-3.793	5.09419e-16	2.4369e-14
FBgn0001215	Hrb98DE	24598	29006.4	20189.6	0.69604	-0.522758	0.000781638	0.00598959
FBgn0001216	Hsc70-1	4.9075	2.86263	6.95237	2.42866	1.28016	0.450517	0.763867
FBgn0001217	Hsc70-2	315.471	626.973	3.96863	0.00632983	-7.30362	8.9894e-26	9.51628e-24
FBgn0001218	Hsc70-3	42012.3	43602.8	40421.8	0.927046	-0.109287	0.623474	0.905051
FBgn0001219	Hsc70-4	232925	203541	262310	1.28873	0.365951	0.0552126	0.185388
FBgn0001220	Hsc70-5	11110	9961.28	12258.8	1.23064	0.299411	0.164048	0.407724
FBgn0001222	Hsf	4901.82	4891.5	4912.14	1.00422	0.00607282	0.953256	1
FBgn0001223	Hsp22	0	0	0	NA	NA	NA	NA
FBgn0001224	Hsp23	69291.1	85234.7	53347.5	0.62589	-0.67602	0.48987	0.797051
FBgn0001225	Hsp26	43097.5	35421.3	50773.7	1.43342	0.519463	0.721783	0.977273
FBgn0001226	Hsp27	68040.7	93776.9	42304.5	0.451119	-1.14842	0.0548559	0.184515
FBgn0001227	Hsp67Ba	5261.4	8851.83	1670.97	0.188771	-2.40529	1.45257e-05	0.000174629
FBgn0001228	Hsp67Bb	1.56009	1.12994	1.99024	1.76137	0.816694	0.824766	1
FBgn0001229	Hsp67Bc	305.083	62.7925	547.373	8.71718	3.12386	0.158468	0.397928
FBgn0001230	Hsp68	24225	16313.2	32136.8	1.96999	0.978186	0.510759	0.81746
FBgn0001233	Hsp83	142796	138932	146661	1.05563	0.0781021	0.855596	1
FBgn0001234	Hsromega	1359.38	1050.37	1668.39	1.58839	0.667564	0.510868	0.81746
FBgn0001235	hth	43109	46086	40132.1	0.870807	-0.199575	0.563586	0.858902
FBgn0001247	Ide	3411.86	3017.59	3806.13	1.26132	0.33493	0.043644	0.155737
FBgn0001248	Idh	15614.3	18275.1	12953.6	0.708812	-0.496525	0.00221085	0.0144521
FBgn0001250	if	5103.43	4764.65	5442.2	1.1422	0.19182	0.482016	0.790431
FBgn0001253	ImpE1	8418.42	15160.5	1676.3	0.11057	-3.17697	0.00111147	0.00809903
FBgn0001254	ImpE2	32795.2	64986.2	604.198	0.00929732	-6.74897	1.49872e-15	6.88145e-14
FBgn0001255	ImpE3	0	0	0	NA	NA	NA	NA
FBgn0001256	ImpL1	33.7633	56.0739	11.4526	0.204242	-2.29165	0.000480634	0.0039533
FBgn0001257	ImpL2	25123.5	2751.21	47495.8	17.2636	4.10966	1.60631e-20	1.16974e-18
FBgn0001258	ImpL3	18720.9	332.69	37109.1	111.543	6.80145	5.6501e-20	3.86812e-18
FBgn0001259	in	1813.52	2023.19	1603.85	0.792731	-0.335096	0.0460229	0.162201
FBgn0001263	inaD	122.104	64.3999	179.808	2.79205	1.48133	0.0182343	0.0798744
FBgn0001269	inv	2829.24	4233.8	1424.67	0.3365	-1.57132	9.49008e-20	6.38236e-18
FBgn0001276	ix	475.33	470.399	480.261	1.02097	0.0299344	0.877061	1
FBgn0001280	janA	3028.23	3571.68	2484.78	0.695691	-0.523482	0.00172093	0.0116079
FBgn0001281	janB	5.12017	7.78668	2.45365	0.315108	-1.66608	0.372849	0.68677
FBgn0001285	Jon44E	2.46512	4.93023	0	0	#NAME?	0.333461	0.643127
FBgn0001291	Jra	3781.17	2868.3	4694.04	1.63653	0.710637	1.52416e-05	0.000182087
FBgn0001296	kar	382.328	427.763	336.894	0.787571	-0.344518	0.136594	0.358267
FBgn0001297	kay	20290	18577.3	22002.8	1.18439	0.244143	0.37845	0.692846
FBgn0001301	kel	4777.97	5856.38	3699.56	0.631714	-0.662655	4.32611e-05	0.000465291
FBgn0001308	Khc	10197.7	8768.76	11626.7	1.32592	0.40699	0.0124029	0.0587028
FBgn0001311	kkv	13076.9	12492.4	13661.5	1.09359	0.129067	0.437979	0.75362
FBgn0001313	kl-2	0	0	0	NA	NA	NA	NA
FBgn0001314	kl-3	0	0	0	NA	NA	NA	NA
FBgn0001315	kl-5	0	0	0	NA	NA	NA	NA
FBgn0001316	klar	30956.9	33841.9	28071.9	0.829499	-0.269687	0.0819925	0.249912
FBgn0001319	kn	930.095	1791.48	68.707	0.038352	-4.70455	1.88495e-72	3.07866e-69
FBgn0001320	kni	1835.45	1240.75	2430.15	1.9586	0.969825	8.28954e-08	1.48085e-06
FBgn0001321	knk	4124.09	4364.09	3884.08	0.89001	-0.168107	0.29548	0.598657
FBgn0001323	knrl	2259.26	1351.86	3166.66	2.34245	1.22802	3.14449e-10	7.90131e-09
FBgn0001324	kto	8101.35	9282.09	6920.62	0.745589	-0.423548	0.0174549	0.07753
FBgn0001325	Kr	4.93503	2.42734	7.44271	3.0662	1.61645	0.299573	0.603527
FBgn0001330	kz	1746.71	1867.02	1626.39	0.871117	-0.199061	0.300829	0.604495
FBgn0001332	L	3756.11	3759.22	3753	0.998346	-0.00238806	0.950061	1
FBgn0001337	Exp6	4612.46	4985.24	4239.67	0.850445	-0.233709	0.160847	0.402343
FBgn0001341	l(1)1Bi	2981.94	3152.68	2811.21	0.89169	-0.165386	0.360099	0.673708
FBgn0001404	egh	2031.18	1947.19	2115.17	1.08627	0.119383	0.5806	0.872388
FBgn0001491	l(1)10Bb	1450.97	1503.66	1398.27	0.929912	-0.104834	0.548762	0.848641
FBgn0001565	Hlc	4363.07	3863.21	4862.93	1.25878	0.332024	0.0412211	0.149471
FBgn0001612	l(1)dd4	2368.16	2643.6	2092.73	0.791623	-0.337114	0.0630557	0.203821
FBgn0001624	dlg1	11292.6	11483.4	11101.8	0.96677	-0.0487556	0.739567	0.985998
FBgn0001941	ifc	3451.36	2027.77	4874.94	2.40409	1.26549	7.39385e-14	2.85587e-12
FBgn0001942	eIF-4a	109259	96307.2	122212	1.26898	0.343667	0.0274532	0.109707
FBgn0001961	Sop2	6116.44	3324.43	8908.45	2.6797	1.42207	3.16022e-17	1.68836e-15
FBgn0001965	Sos	4730.03	5493.64	3966.41	0.722001	-0.469928	0.0034416	0.020852
FBgn0001967	nimC3	15.4109	14.6776	16.1442	1.09992	0.137404	0.952982	1
FBgn0001970	Pgant35A	10.327	10.4584	10.1956	0.974873	-0.0367142	0.945891	1
FBgn0001974	l(2)35Bd	1008.22	964.538	1051.91	1.09058	0.125096	0.461061	0.771752
FBgn0001977	l(2)35Bg	1943.01	1797.04	2088.98	1.16246	0.217175	0.207758	0.477255
FBgn0001978	stc	4816.99	4359.86	5274.13	1.2097	0.274652	0.106381	0.302418
FBgn0001981	esg	3989.43	3243.6	4735.25	1.45987	0.545842	0.00368211	0.022145
FBgn0001983	wor	11.0516	9.88937	12.2138	1.23504	0.304558	0.793764	1
FBgn0001986	l(2)35Df	2860.88	3030.1	2691.66	0.888306	-0.170872	0.313767	0.620339
FBgn0001987	Gli	10567	10215.5	10918.5	1.06882	0.0960187	0.596358	0.886189
FBgn0001989	l(2)35Di	1816.4	1777.2	1855.61	1.04412	0.062281	0.660078	0.932884
FBgn0001990	wek	861.719	823.453	899.984	1.09294	0.128213	0.43817	0.75362
FBgn0001991	Ca-alpha1D	10.7048	9.0182	12.3913	1.37403	0.458418	0.721927	0.977273
FBgn0001992	Cyp303a1	41.9895	63.9608	20.0183	0.312977	-1.67587	0.0024199	0.0156045
FBgn0001994	crp	11454.5	11636.2	11272.8	0.968777	-0.0457629	0.735667	0.983499
FBgn0001995	mRpL4	924.944	1015.67	834.22	0.82135	-0.283931	0.149131	0.381826
FBgn0002021	l(2)37Bb	722.133	651.534	792.732	1.21672	0.282993	0.140623	0.365478
FBgn0002022	Catsup	4697.3	4951.38	4443.22	0.897369	-0.156226	0.34255	0.653601
FBgn0002023	Lim3	12.4823	0.819646	24.1449	29.4577	4.88057	0.00011219	0.00110006
FBgn0002031	l(2)37Cc	7253.66	6812.41	7694.92	1.12954	0.17574	0.267622	0.562552
FBgn0002036	CG10561	179.353	159.664	199.042	1.24663	0.318036	0.307733	0.612306
FBgn0002044	swm	5248.47	5619.58	4877.35	0.867922	-0.204363	0.210003	0.480481
FBgn0002069	Aats-asp	11518.4	9745.37	13291.4	1.36387	0.447703	0.00507412	0.0289628
FBgn0002121	l(2)gl	20682.3	16195.1	25169.5	1.55414	0.636121	5.82114e-05	0.000610019
FBgn0002174	l(2)tid	0	0	0	NA	NA	NA	NA
FBgn0002183	dre4	16431.3	17953.7	14909	0.830414	-0.268097	0.104435	0.298202
FBgn0002283	l(3)73Ah	1159.5	1219.88	1099.12	0.90101	-0.150385	0.403771	0.719111
FBgn0002284	Pros26	5527.31	5258.62	5796	1.10219	0.140373	0.363768	0.676619
FBgn0002306	sas	19663.5	13291.2	26035.8	1.95888	0.970031	2.051e-05	0.000236621
FBgn0002354	l(3)87Df	246.163	344.005	148.321	0.431161	-1.2137	2.73497e-07	4.54489e-06
FBgn0002413	dco	7230.26	7674.48	6786.04	0.884234	-0.1775	0.247429	0.533243
FBgn0002431	hyd	17437.6	19929.4	14945.8	0.74994	-0.415153	0.0967833	0.281917
FBgn0002440	l(3)mbn	1.8985	2.57018	1.22682	0.477331	-1.06694	0.751643	0.992326
FBgn0002441	l(3)mbt	2981.99	2796.71	3167.27	1.1325	0.17951	0.263948	0.557136
FBgn0002466	sti	11399.6	13589	9210.19	0.677771	-0.561131	0.000706806	0.00551598
FBgn0002521	pho	5621.31	5887.98	5354.65	0.90942	-0.136981	0.436387	0.752408
FBgn0002522	lab	79.0803	21.6803	136.48	6.29513	2.65424	5.56736e-07	8.8405e-06
FBgn0002524	lace	3076.43	2483.06	3669.81	1.47794	0.563586	0.000674433	0.00530316
FBgn0002525	Lam	28754.9	32335.8	25173.9	0.778514	-0.361205	0.0266888	0.107139
FBgn0002526	LanA	40683.4	41680.3	39686.4	0.952162	-0.0707211	0.863536	1
FBgn0002528	LanB2	12706.8	12704.6	12709.1	1.00035	0.000509182	0.998523	1
FBgn0002531	Lcp1	26.9042	49.8431	3.96539	0.0795575	-3.65186	0.00282128	0.017655
FBgn0002533	Lcp2	18.153	31.8422	4.46376	0.140184	-2.83461	0.00476149	0.027494
FBgn0002534	Lcp3	12.8539	22.9176	2.79016	0.121748	-3.03803	0.193687	0.456419
FBgn0002535	Lcp4	60.6364	116.053	5.22011	0.0449805	-4.47455	0.00482365	0.0277968
FBgn0002542	lds	4992.22	5605.88	4378.55	0.781064	-0.356487	0.030076	0.117683
FBgn0002543	lea	15960.4	20555.7	11365	0.552886	-0.854945	3.433e-06	4.71182e-05
FBgn0002552	lin	2143.94	2167.78	2120.11	0.97801	-0.0320782	0.834705	1
FBgn0002561	l(1)sc	0	0	0	NA	NA	NA	NA
FBgn0002562	Lsp1alpha	99.1876	33.1861	165.189	4.97766	2.31547	0.368556	0.682713
FBgn0002563	Lsp1beta	690.448	298.591	1082.31	3.6247	1.85786	0.357798	0.671157
FBgn0002564	Lsp1gamma	227.001	390.183	63.8179	0.163559	-2.61212	0.377986	0.692328
FBgn0002565	Lsp2	462.517	371.586	553.448	1.48942	0.574753	0.733788	0.982937
FBgn0002566	lt	3784.64	3503.13	4066.16	1.16072	0.215025	0.187465	0.44624
FBgn0002567	ltd	182.566	323.027	42.1056	0.130347	-2.93957	1.16259e-08	2.34424e-07
FBgn0002569	Mal-A2	1.22553	2.10269	0.348366	0.165676	-2.59356	0.632425	0.911563
FBgn0002570	Mal-A1	1.97901	2.10269	1.85532	0.882356	-0.180567	1	1
FBgn0002571	Mal-A3	0	0	0	NA	NA	NA	NA
FBgn0002573	sens	106.949	203.141	10.7559	0.0529479	-4.23928	1.13693e-12	3.86038e-11
FBgn0002576	lz	30.2577	2.45485	58.0605	23.6513	4.56385	2.74732e-14	1.09443e-12
FBgn0002577	m	48.9221	76.5987	21.2454	0.27736	-1.85017	0.0251238	0.102112
FBgn0002578	m1	32.3135	39.7108	24.9161	0.627439	-0.672453	0.456442	0.768322
FBgn0002579	RpL36	61126.9	51673.3	70580.4	1.3659	0.449848	0.0368206	0.137492
FBgn0002590	RpS5a	74591.8	69321.8	79861.7	1.15204	0.204195	0.179605	0.431937
FBgn0002592	m2	1310.37	1887.7	733.046	0.388328	-1.36465	5.66252e-05	0.000595033
FBgn0002593	RpLP1	73776.5	65467.5	82085.5	1.25384	0.326349	0.207335	0.476652
FBgn0002607	RpL19	85214	74113.4	96314.6	1.29956	0.378021	0.0643578	0.206512
FBgn0002609	HLHm3	2073.51	2660.44	1486.58	0.558773	-0.839667	0.00361773	0.0218151
FBgn0002622	RpS3	89154.4	77391.2	100918	1.30399	0.382935	0.0129487	0.0607818
FBgn0002626	RpL32	45925	41189.8	50660.3	1.22992	0.298568	0.165259	0.40905
FBgn0002629	m4	446.288	653.817	238.759	0.365176	-1.45333	3.82766e-08	7.10417e-07
FBgn0002631	HLHm5	13.0604	18.4002	7.72057	0.419591	-1.25294	0.217012	0.491113
FBgn0002632	m6	488.76	394.506	583.015	1.47783	0.563484	0.387744	0.701992
FBgn0002633	HLHm7	833.671	1318.6	348.743	0.26448	-1.91877	0.000755857	0.0058084
FBgn0002638	Bj1	7968.78	7855.2	8082.37	1.02892	0.0411303	0.839898	1
FBgn0002641	mal	1128.49	1060.05	1196.93	1.12912	0.175196	0.359482	0.673212
FBgn0002643	mam	9127.29	9783.4	8471.18	0.865873	-0.207773	0.275921	0.574621
FBgn0002645	Map205	13822.1	18998.3	8645.9	0.455087	-1.13579	0.000351446	0.00301431
FBgn0002652	squ	0	0	0	NA	NA	NA	NA
FBgn0002673	twe	272.147	277.02	267.273	0.964815	-0.0516761	0.81959	1
FBgn0002707	mei-9	1407.99	1418.64	1397.34	0.984987	-0.0218237	0.957398	1
FBgn0002709	mei-218	62.8419	79.8757	45.808	0.573491	-0.802157	0.175827	0.426259
FBgn0002715	mei-S332	631.918	670.163	593.673	0.885863	-0.174844	0.486821	0.795118
FBgn0002716	mei-W68	0	0	0	NA	NA	NA	NA
FBgn0002719	Men	3907.52	899.313	6915.72	7.69	2.94298	1.01823e-25	1.06802e-23
FBgn0002723	Met	791.224	760.049	822.398	1.08203	0.113744	0.630404	0.910525
FBgn0002732	malpha	2320.7	3212.57	1428.83	0.444763	-1.16889	0.00868508	0.044073
FBgn0002733	HLHmbeta	2991.81	3281.84	2701.78	0.823251	-0.280596	0.433222	0.748757
FBgn0002734	HLHmdelta	505.584	846.001	165.168	0.195234	-2.35672	2.31574e-16	1.1363e-14
FBgn0002735	HLHmgamma	192.07	186.45	197.689	1.06028	0.0844459	0.779722	1
FBgn0002736	mago	3362.18	3404.19	3320.16	0.975315	-0.0360603	0.843982	1
FBgn0002772	Mlc1	165.519	122.637	208.401	1.69932	0.764961	0.453199	0.766256
FBgn0002773	Mlc2	1140.56	727.943	1553.17	2.13364	1.09332	0.00859913	0.0438119
FBgn0002774	mle	4227.07	4958.56	3495.57	0.704957	-0.504393	0.00244767	0.0157303
FBgn0002775	msl-3	1381.66	1486.73	1276.59	0.858654	-0.219851	0.22399	0.501053
FBgn0002778	mnd	4839.75	2171.23	7508.28	3.45808	1.78997	3.46651e-10	8.5971e-09
FBgn0002780	mod	26611.7	24452.8	28770.6	1.17658	0.234597	0.114851	0.31879
FBgn0002781	mod(mdg4)	20018	22576.2	17459.8	0.773373	-0.370764	0.0208348	0.0880932
FBgn0002783	mor	14253.7	17468.4	11039	0.63194	-0.662141	3.9082e-05	0.000425547
FBgn0002787	Mov34	6765.63	7046.32	6484.94	0.920331	-0.119775	0.419463	0.734977
FBgn0002789	Mp20	232.679	121.844	343.515	2.8193	1.49534	0.168727	0.4148
FBgn0002791	mr	1988.25	2141.21	1835.28	0.85712	-0.222431	0.218946	0.494314
FBgn0002838	ms(3)K81	3.58337	4.70506	2.46167	0.523196	-0.934577	0.491261	0.798378
FBgn0002842	sa	0	0	0	NA	NA	NA	NA
FBgn0002855	Acp26Aa	0	0	0	NA	NA	NA	NA
FBgn0002856	Acp26Ab	0	0	0	NA	NA	NA	NA
FBgn0002862	Mst87F	2.04776	0	4.09552	Inf	Inf	0.0957167	0.279736
FBgn0002863	Acp95EF	0	0	0	NA	NA	NA	NA
FBgn0002865	Mst98Ca	0.174183	0	0.348366	Inf	Inf	1	1
FBgn0002868	MtnA	766.787	80.5145	1453.06	18.0472	4.1737	3.63322e-07	5.91717e-06
FBgn0002869	MtnB	0.519721	0.509351	0.530092	1.04072	0.0575831	1	1
FBgn0002872	mu2	2606.75	2878.96	2334.53	0.810893	-0.302416	0.0892345	0.26582
FBgn0002873	mud	8347.05	10186.7	6507.36	0.638806	-0.646549	0.000142771	0.00135236
FBgn0002878	mus101	1907.08	2186.05	1628.1	0.744766	-0.425141	0.019978	0.0852589
FBgn0002887	mus201	0	0	0	NA	NA	NA	NA
FBgn0002891	mus205	1622.37	1602.37	1642.38	1.02497	0.0355821	0.948755	1
FBgn0002899	mus301	983.97	979.74	988.2	1.00863	0.0124041	0.919758	1
FBgn0002901	mus304	683.09	699.131	667.048	0.95411	-0.0677727	0.777649	1
FBgn0002905	mus308	1607.88	1669.87	1545.89	0.925754	-0.111299	0.544335	0.843983
FBgn0002906	mus309	1222.33	1315.26	1129.4	0.858692	-0.219787	0.2259	0.503453
FBgn0002909	mus312	0	0	0	NA	NA	NA	NA
FBgn0002914	Myb	8172.75	9021.96	7323.53	0.811745	-0.300901	0.0618458	0.200839
FBgn0002917	na	484.865	25.6108	944.119	36.8642	5.20415	8.66641e-65	8.25692e-62
FBgn0002921	Atpalpha	30679.1	33271.2	28087.1	0.844186	-0.244367	0.132845	0.352148
FBgn0002922	nau	15.6327	23.9751	7.29043	0.304084	-1.71746	0.0492797	0.170162
FBgn0002924	ncd	5253.96	5634.54	4873.39	0.864912	-0.209374	0.247724	0.533462
FBgn0002926	ndl	3.98384	6.59086	1.37683	0.2089	-2.25912	0.347584	0.658808
FBgn0002930	nec	0	0	0	NA	NA	NA	NA
FBgn0002931	net	1014.39	1077.74	951.038	0.882434	-0.180439	0.403708	0.719111
FBgn0002932	neur	665.703	547.935	783.471	1.42986	0.515874	0.0068352	0.0368564
FBgn0002933	ng1	0	0	0	NA	NA	NA	NA
FBgn0002936	ninaA	4.30913	8.30161	0.316642	0.0381423	-4.71247	0.113964	0.317495
FBgn0002937	ninaB	2.15826	2.14455	2.17196	1.01278	0.0183224	0.992691	1
FBgn0002938	ninaC	74.9703	118.688	31.2521	0.263312	-1.92516	9.62266e-06	0.000120499
FBgn0002939	ninaD	0.944639	0.662455	1.22682	1.85194	0.889035	0.916999	1
FBgn0002940	ninaE	3.66299	6.18248	1.1435	0.184959	-2.43472	0.360218	0.673708
FBgn0002941	slou	5.64352	3.78793	7.4991	1.97973	0.985305	0.634705	0.913582
FBgn0002945	nkd	11268.5	13548.5	8988.53	0.663431	-0.591981	0.0648024	0.207701
FBgn0002948	nod	1060.19	1337.66	782.715	0.585136	-0.773156	3.1121e-05	0.000346116
FBgn0002962	nos	0.581688	0	1.16338	Inf	Inf	0.746889	0.989108
FBgn0002968	Nrg	29748.9	24111	35386.7	1.46766	0.553516	0.033074	0.126848
FBgn0002973	numb	8230.68	8633.85	7827.51	0.906607	-0.141451	0.369441	0.683686
FBgn0002985	odd	949.61	429.886	1469.33	3.41796	1.77313	1.37207e-10	3.64811e-09
FBgn0002989	okr	697.056	704.332	689.78	0.97934	-0.0301182	0.878585	1
FBgn0003002	opa	1252.27	942.638	1561.89	1.65694	0.72852	0.000121195	0.00117227
FBgn0003008	or	745.332	772.43	718.235	0.929837	-0.10495	0.613242	0.896688
FBgn0003009	ord	0.775527	0.704319	0.846735	1.2022	0.265681	0.990221	1
FBgn0003011	ort	7.17866	6.68834	7.66897	1.14662	0.197385	0.838176	1
FBgn0003015	osk	0.158321	0	0.316642	Inf	Inf	0.999882	1
FBgn0003016	osp	4716.96	3535.04	5898.89	1.66869	0.738717	0.0432816	0.15483
FBgn0003022	Ote	3228.2	3436.36	3020.04	0.878849	-0.186313	0.318797	0.6252
FBgn0003023	otu	8.02573	8.74917	7.30228	0.834626	-0.260798	0.802189	1
FBgn0003028	ovo	13650.5	14979.4	12321.6	0.822566	-0.281797	0.419919	0.735438
FBgn0003034	Acp70A	0	0	0	NA	NA	NA	NA
FBgn0003041	pbl	5391.54	6887.66	3895.42	0.565565	-0.822234	6.12193e-07	9.65407e-06
FBgn0003042	Pc	942.782	946.64	938.923	0.991848	-0.0118093	0.903338	1
FBgn0003044	Pcl	4284.22	5054.79	3513.65	0.695114	-0.524679	0.00124823	0.00890807
FBgn0003046	Pcp	0	0	0	NA	NA	NA	NA
FBgn0003048	pcx	4582.92	4399.36	4766.49	1.08345	0.115634	0.654402	0.92803
FBgn0003053	peb	235.309	357.968	112.651	0.314696	-1.66797	7.02964e-13	2.43545e-11
FBgn0003057	CG10598	0.132523	0	0.265046	Inf	Inf	1	1
FBgn0003060	CG9757	1.13786	0.35216	1.92356	5.46217	2.44947	0.707398	0.96812
FBgn0003062	Fib	10457.5	10809.1	10105.9	0.934942	-0.0970513	0.544163	0.843983
FBgn0003065	CG2150	6.82251	11.473	2.17196	0.18931	-2.40118	0.194426	0.457665
FBgn0003067	Pepck	6948.14	3399.93	10496.4	3.08723	1.62631	0.000282947	0.0024713
FBgn0003068	per	66.5265	36.1008	96.9522	2.6856	1.42524	0.0426127	0.15306
FBgn0003071	Pfk	6316.42	5790.62	6842.23	1.18161	0.240749	0.254159	0.542938
FBgn0003074	Pgi	4680.37	4809.12	4551.61	0.946453	-0.0793974	0.640598	0.917959
FBgn0003076	Pgm	1047.43	951.887	1142.97	1.20074	0.263923	0.180917	0.434087
FBgn0003079	phl	1905.99	2218.47	1593.5	0.718289	-0.477364	0.00517184	0.0294211
FBgn0003082	phr	1755.79	1671.29	1840.29	1.10112	0.138969	0.442842	0.75669
FBgn0003086	Pig1	0	0	0	NA	NA	NA	NA
FBgn0003087	pim	1136.52	1402.8	870.232	0.620352	-0.688841	0.00104631	0.00768545
FBgn0003089	pip	385.123	717.38	52.8665	0.0736938	-3.76231	1.59088e-29	2.33186e-27
FBgn0003090	pk	3376.01	5658.98	1093.05	0.193152	-2.37219	1.99419e-17	1.10143e-15
FBgn0003091	Pkc53E	7.99867	12.3922	3.60517	0.290924	-1.78129	0.36761	0.681181
FBgn0003093	Pkc98E	2375.8	2618.1	2133.51	0.814905	-0.295296	0.0615008	0.199926
FBgn0003114	plu	0.310295	0.62059	0	0	#NAME?	0.8051	1
FBgn0003116	pn	143.921	120.755	167.088	1.3837	0.468526	0.144214	0.372181
FBgn0003117	pnr	1189.85	1686.48	693.223	0.411047	-1.28263	0.00126896	0.00899445
FBgn0003118	pnt	1676.07	2208.21	1143.93	0.518034	-0.948882	5.67548e-08	1.03655e-06
FBgn0003124	polo	14484.2	17010	11958.4	0.70302	-0.508362	0.00160476	0.0109405
FBgn0003129	Poxm	60.535	4.50192	116.568	25.893	4.69449	2.89742e-11	8.4939e-10
FBgn0003130	Poxn	327.45	482.028	172.873	0.358637	-1.4794	5.33823e-10	1.2997e-08
FBgn0003132	Pp1-13C	0	0	0	NA	NA	NA	NA
FBgn0003134	Pp1alpha-96A	2952.47	2668.6	3236.34	1.21275	0.278282	0.110252	0.310699
FBgn0003137	Ppn	20219	27141.8	13296.1	0.489875	-1.02951	0.00296019	0.0183635
FBgn0003138	Ptp61F	7646.84	7241.6	8052.09	1.11192	0.153055	0.356587	0.669765
FBgn0003139	PpV	2402.46	2188.87	2616.04	1.19516	0.2572	0.135334	0.355912
FBgn0003140	PpY-55A	0.265046	0	0.530092	Inf	Inf	0.943122	1
FBgn0003141	pr	1286.86	1369.32	1204.39	0.879553	-0.185158	0.297785	0.601622
FBgn0003145	prd	2.22678	1.86177	2.5918	1.39212	0.47728	0.841634	1
FBgn0003149	Prm	265.207	181.788	348.626	1.91776	0.939424	0.401665	0.716865
FBgn0003159	ptr	674.125	467.013	881.237	1.88697	0.916068	3.38094e-05	0.000374194
FBgn0003162	Pu	137.671	184.055	91.2877	0.49598	-1.01165	0.0012491	0.00890807
FBgn0003165	pum	14234.5	17530.5	10938.4	0.623965	-0.680463	0.0305209	0.118932
FBgn0003169	put	5367.99	5697.71	5038.28	0.884263	-0.177453	0.256929	0.546913
FBgn0003174	pwn	4143.35	3905.6	4381.1	1.12175	0.165746	0.302898	0.606379
FBgn0003175	px	4776.66	5260.83	4292.49	0.815933	-0.293477	0.156568	0.39463
FBgn0003178	PyK	11798.6	10386.4	13210.9	1.27194	0.347031	0.03372	0.128721
FBgn0003187	qua	11.5851	16.7797	6.39055	0.380851	-1.3927	0.0928456	0.273372
FBgn0003189	r	9060.39	9890.3	8230.47	0.832176	-0.265039	0.288235	0.590466
FBgn0003204	ras	6213.69	6626.39	5800.99	0.875437	-0.191925	0.245496	0.531219
FBgn0003205	Ras85D	8387.21	8426.55	8347.88	0.990664	-0.0135321	0.942575	1
FBgn0003206	Ras64B	4567.3	2320.52	6814.07	2.93643	1.55407	2.79947e-20	1.96358e-18
FBgn0003209	raw	4014.74	3130.97	4898.51	1.56453	0.645733	5.51236e-05	0.000579787
FBgn0003210	rb	0	0	0	NA	NA	NA	NA
FBgn0003218	rdgB	673.811	440.87	906.752	2.05673	1.04035	2.12894e-07	3.57944e-06
FBgn0003227	rec	549.276	658.618	439.933	0.667964	-0.582158	0.00285847	0.0178487
FBgn0003231	ref(2)P	4446.34	3311.76	5580.93	1.68519	0.752908	6.51973e-06	8.46084e-05
FBgn0003248	Rh2	3.26463	4.50252	2.02675	0.450137	-1.15157	0.605474	0.892175
FBgn0003249	Rh3	0	0	0	NA	NA	NA	NA
FBgn0003250	Rh4	1.57142	2.3477	0.795138	0.338688	-1.56197	0.708089	0.968835
FBgn0003254	rib	7.14525	9.15695	5.13355	0.560619	-0.834908	0.107893	0.305633
FBgn0003255	rk	194.748	209.12	180.376	0.862547	-0.213325	0.533599	0.837132
FBgn0003256	rl	2988.9	3183.15	2794.66	0.877955	-0.187781	0.400751	0.716112
FBgn0003257	r-l	2519.59	2686.64	2352.54	0.875644	-0.191584	0.279969	0.580291
FBgn0003261	Rm62	93071.8	94168.3	91975.3	0.976713	-0.033994	0.830539	1
FBgn0003267	ro	0.287671	0.310295	0.265046	0.854174	-0.227397	1	1
FBgn0003268	rod	6159.97	7248.45	5071.49	0.699665	-0.515264	0.00214467	0.0140516
FBgn0003270	amos	1.24266	1.90363	0.581688	0.305567	-1.71044	0.837027	1
FBgn0003274	RpLP2	100784	84888.5	116679	1.3745	0.458903	0.0252687	0.102614
FBgn0003275	RpII18	2933.67	3102.78	2764.57	0.890998	-0.166507	0.303223	0.606713
FBgn0003277	RpII215	13305.5	15092.5	11518.5	0.763197	-0.389873	0.0648736	0.207817
FBgn0003278	RpI135	2393.44	2668.02	2118.85	0.794165	-0.332489	0.0545501	0.183811
FBgn0003279	RpL4	100289	89982	110597	1.2291	0.297599	0.0461731	0.16248
FBgn0003285	rst	0	0	0	NA	NA	NA	NA
FBgn0003292	rt	2003.81	2239.99	1767.63	0.789126	-0.341672	0.297029	0.600626
FBgn0003295	ru	0	0	0	NA	NA	NA	NA
FBgn0003300	run	1.77422	2.30175	1.2467	0.541631	-0.884618	0.80409	1
FBgn0003301	rut	2844.44	4265.63	1423.25	0.333655	-1.58357	5.49507e-09	1.16993e-07
FBgn0003302	rux	486.552	478.253	494.851	1.03471	0.0492205	0.830188	1
FBgn0003308	ry	104.724	181.044	28.4038	0.156889	-2.67218	7.29938e-10	1.75323e-08
FBgn0003310	S	3976.44	4766.08	3186.8	0.668642	-0.580695	0.000487632	0.00399363
FBgn0003312	sad	80.4715	100.255	60.6885	0.605345	-0.724171	0.0881594	0.263717
FBgn0003313	sala	0	0	0	NA	NA	NA	NA
FBgn0003317	sax	2940.55	2955.49	2925.61	0.989891	-0.0146588	0.873137	1
FBgn0003319	Sb	1526.93	2261.61	792.249	0.350304	-1.51332	0.000102737	0.00101609
FBgn0003321	sbr	4964.55	5365.07	4564.04	0.850694	-0.233288	0.159819	0.40063
FBgn0003326	sca	1764.76	2870.55	658.978	0.229565	-2.12302	7.36619e-12	2.27002e-10
FBgn0003328	scb	7609.61	3753.15	11466.1	3.05506	1.6112	1.09864e-16	5.60748e-15
FBgn0003330	Sce	1657.97	1888.65	1427.29	0.755721	-0.404074	0.0206755	0.0875491
FBgn0003334	Scm	3307.81	3659.4	2956.21	0.807839	-0.307861	0.0585701	0.193312
FBgn0003339	Scr	78.2108	20.8718	135.55	6.4944	2.6992	4.86589e-22	3.86331e-20
FBgn0003345	sd	18648.9	21805.2	15492.6	0.7105	-0.493092	0.00148577	0.0102764
FBgn0003346	RanGap	7172.03	7870.9	6473.15	0.822415	-0.282061	0.0907654	0.268422
FBgn0003353	sei	773.548	894.205	652.89	0.730135	-0.453765	0.0179871	0.0793388
FBgn0003356	Jon99Cii	2.40232	4.80464	0	0	#NAME?	0.295568	0.598665
FBgn0003357	Jon99Ciii	44.5049	85.034	3.97569	0.0467541	-4.41876	0.224457	0.501665
FBgn0003358	Jon99Ci	11.5655	19.8543	3.27668	0.165036	-2.59914	0.0451433	0.159889
FBgn0003360	sesB	1.66353	1.73678	1.59028	0.915648	-0.127134	1	1
FBgn0003366	sev	19.9971	12.3064	27.6878	2.24986	1.16984	0.13755	0.360195
FBgn0003371	sgg	18705.9	17859.7	19552.1	1.09476	0.130611	0.429124	0.745393
FBgn0003372	Sgs1	6.44814	5.34559	7.55069	1.41251	0.49826	0.754409	0.992995
FBgn0003373	Sgs3	6.36165	9.05946	3.66383	0.404421	-1.30607	0.441587	0.755993
FBgn0003374	Sgs4	0	0	0	NA	NA	NA	NA
FBgn0003375	Sgs5	4.12021	8.24041	0	0	#NAME?	0.00515409	0.0293606
FBgn0003377	Sgs7	6.54368	9.82349	3.26387	0.332252	-1.58965	0.350517	0.661624
FBgn0003378	Sgs8	9.62516	13.3629	5.8874	0.440577	-1.18253	0.39199	0.706435
FBgn0003380	Sh	17.625	16.5068	18.7431	1.13547	0.183293	0.890086	1
FBgn0003382	sha	7.05611	11.2903	2.82189	0.249938	-2.00036	0.0683678	0.216463
FBgn0003386	Shaw	12.5519	19.3101	5.79378	0.300039	-1.73678	0.160844	0.402343
FBgn0003388	shd	31.6545	45.9918	17.3172	0.376527	-1.40917	0.0166155	0.0746129
FBgn0003390	shf	5228.02	5717.83	4738.21	0.828673	-0.271124	0.0873754	0.262096
FBgn0003391	shg	22539.4	21903.2	23175.7	1.0581	0.081476	0.676313	0.944228
FBgn0003392	shi	7783.05	8204.19	7361.91	0.897336	-0.156279	0.347048	0.658119
FBgn0003396	shn	9719.3	11221	8217.64	0.732347	-0.449401	0.126421	0.340247
FBgn0003401	shu	581.538	482.724	680.352	1.4094	0.495082	0.011944	0.0568747
FBgn0003410	sina	0	0	0	NA	NA	NA	NA
FBgn0003411	sisA	0.308603	0.35216	0.265046	0.752631	-0.409986	1	1
FBgn0003415	skd	8855.68	10163.5	7547.87	0.742645	-0.429255	0.0163769	0.0737733
FBgn0003416	sl	2418.09	2709.15	2127.03	0.785127	-0.349002	0.118615	0.325367
FBgn0003423	slgA	4687.6	5905.04	3470.16	0.58766	-0.766945	4.85084e-06	6.4413e-05
FBgn0003425	sli	10592.4	12506.8	8678.03	0.693864	-0.527275	0.0971611	0.282657
FBgn0003429	slo	16.1669	14.3541	17.9797	1.25258	0.324901	0.774484	1
FBgn0003430	slp1	4.01322	3.38573	4.6407	1.37066	0.454873	0.541688	0.842438
FBgn0003435	sm	397.806	716.29	79.3213	0.110739	-3.17476	0.00112256	0.00817031
FBgn0003444	smo	3900.08	4404.21	3395.94	0.771066	-0.375074	0.0191663	0.0827835
FBgn0003447	sn	19745.6	14086.2	25405	1.80354	0.850828	1.72086e-07	2.93651e-06
FBgn0003448	sna	5.86567	2.1308	9.60055	4.50561	2.17172	0.239173	0.522843
FBgn0003449	snf	3170.2	3617.1	2723.29	0.752893	-0.409483	0.0165206	0.0743329
FBgn0003450	snk	0.957354	1.38462	0.530092	0.382844	-1.38517	0.884364	1
FBgn0003459	stwl	1406.12	1426.67	1385.57	0.971187	-0.0421787	0.82035	1
FBgn0003460	so	1053.65	628.623	1478.67	2.35224	1.23403	6.97781e-07	1.09134e-05
FBgn0003462	Sod	6026.74	7043.57	5009.9	0.711273	-0.491525	0.0020857	0.0137124
FBgn0003463	sog	5429.27	4174.11	6684.42	1.6014	0.679332	0.0300035	0.117516
FBgn0003464	sol	4674.2	4632.16	4716.24	1.01815	0.0259524	0.884965	1
FBgn0003475	spir	1125.69	417.273	1834.1	4.39544	2.13601	6.20403e-06	8.07867e-05
FBgn0003479	spn-A	721.146	666.67	775.623	1.16343	0.218384	0.263534	0.556621
FBgn0003480	spn-B	222.939	212.934	232.943	1.09397	0.129569	0.595302	0.885518
FBgn0003482	spn-D	85.0485	65.5638	104.533	1.59437	0.672991	0.0648193	0.207701
FBgn0003483	spn-E	398.456	281.466	515.446	1.83129	0.872859	7.08041e-05	0.000722771
FBgn0003486	spo	4.12073	5.23784	3.00361	0.573445	-0.802272	0.717341	0.974949
FBgn0003495	spz	144.434	88.8778	199.989	2.25016	1.17003	0.0175837	0.0779506
FBgn0003499	sr	463.012	766.081	159.942	0.20878	-2.25995	1.72453e-07	2.93702e-06
FBgn0003502	Btk29A	9574.52	10105.2	9043.8	0.894962	-0.160102	0.28359	0.585023
FBgn0003507	srp	225.798	147.678	303.918	2.05799	1.04123	0.00513035	0.0292399
FBgn0003510	Sry-alpha	275.777	356.896	194.657	0.545418	-0.874565	0.0087285	0.0442564
FBgn0003511	Sry-beta	868.125	918.618	817.632	0.890068	-0.168013	0.400148	0.715834
FBgn0003512	Sry-delta	2106.92	2163.81	2050.04	0.947421	-0.0779229	0.656068	0.929932
FBgn0003513	ss	1244.97	1796.5	693.437	0.385994	-1.37335	3.25479e-10	8.16052e-09
FBgn0003514	sqh	12190.4	7907.31	16473.5	2.08332	1.05889	6.21409e-11	1.72861e-09
FBgn0003515	st	0	0	0	NA	NA	NA	NA
FBgn0003517	sta	120027	114550	125503	1.09562	0.13175	0.374743	0.689038
FBgn0003520	stau	6277.82	5780.92	6774.72	1.17191	0.228861	0.165772	0.4097
FBgn0003525	stg	9705.03	7009.36	12400.7	1.76917	0.823069	0.00217963	0.0142561
FBgn0003527	stil	39.21	66.3603	12.0597	0.181731	-2.46013	0.000741914	0.00572054
FBgn0003545	sub	2156.47	2503.32	1809.61	0.722886	-0.468159	0.0060294	0.0334307
FBgn0003557	Su(dx)	3743.06	3761.32	3724.79	0.990287	-0.0140808	0.935708	1
FBgn0003559	su(f)	3601.42	3811.06	3391.78	0.889984	-0.168148	0.350585	0.661644
FBgn0003567	su(Hw)	5321.31	5463.85	5178.77	0.947826	-0.0773062	0.618868	0.900995
FBgn0003575	su(s)	3914.22	4187.15	3641.29	0.869634	-0.201521	0.237586	0.520567
FBgn0003598	Su(var)3-7	4302.03	5019.3	3584.76	0.714195	-0.48561	0.00339425	0.0206418
FBgn0003607	Su(var)205	15874.5	18767	12982	0.691748	-0.531682	0.000922916	0.00691008
FBgn0003612	Su(var)2-10	5622.41	6568.06	4676.77	0.712048	-0.489955	0.00265236	0.0167764
FBgn0003638	su(w[a])	10219.2	9920.75	10517.6	1.06016	0.0842874	0.599388	0.888129
FBgn0003651	svp	820.833	1266.11	375.554	0.29662	-1.75331	1.92105e-10	5.02595e-09
FBgn0003654	sw	2267.43	2203.59	2331.28	1.05795	0.0812677	0.628087	0.908631
FBgn0003655	swa	3.22399	3.2745	3.17349	0.969153	-0.0452032	1	1
FBgn0003656	sws	1502.93	1472.31	1533.54	1.04158	0.0587801	0.833408	1
FBgn0003659	Sxl	0	0	0	NA	NA	NA	NA
FBgn0003660	Syb	0	0	0	NA	NA	NA	NA
FBgn0003676	T-cp1	12644.2	12238.5	13049.9	1.0663	0.0926143	0.549396	0.849159
FBgn0003683	term	0.127338	0.254675	0	0	#NAME?	0.998366	1
FBgn0003687	Tbp	1109.17	1197.32	1021.02	0.852751	-0.229803	0.206768	0.476034
FBgn0003701	thr	1486.95	1627.43	1346.47	0.827362	-0.27341	0.13905	0.362794
FBgn0003710	tipE	5.46813	6.27089	4.66536	0.74397	-0.426683	0.852247	1
FBgn0003714	tko	1122.67	1043.3	1202.03	1.15214	0.20431	0.262545	0.554736
FBgn0003715	CG16778	1.90702	3.1173	0.696732	0.223505	-2.16162	0.0764925	0.236938
FBgn0003716	tkv	18533.9	19420.9	17646.9	0.908657	-0.138193	0.406365	0.722096
FBgn0003719	tld	5891.96	3113.44	8670.47	2.78485	1.4776	1.85543e-18	1.11064e-16
FBgn0003720	tll	0.652245	0.509351	0.795138	1.56108	0.642546	0.994837	1
FBgn0003721	Tm1	39338.9	28534.9	50142.8	1.75725	0.813317	3.42331e-07	5.61531e-06
FBgn0003731	Egfr	17500.4	17548.6	17452.2	0.994508	-0.00794566	0.880278	1
FBgn0003732	Top2	28459.6	32949	23970.2	0.727494	-0.458992	0.00309834	0.019055
FBgn0003733	tor	12.51	17.9796	7.04047	0.391582	-1.35261	0.0968843	0.282067
FBgn0003741	tra	570.232	643.351	497.113	0.772693	-0.372033	0.0543488	0.183403
FBgn0003742	tra2	2106.42	1966.34	2246.51	1.14248	0.192171	0.276367	0.574909
FBgn0003744	trc	3437.19	3686.46	3187.92	0.864763	-0.209623	0.198315	0.463533
FBgn0003747	Gr5a	17.5683	15.1381	19.9985	1.32107	0.401711	0.557495	0.85486
FBgn0003748	Treh	3256.4	2732.19	3780.61	1.38373	0.46856	0.0289049	0.114112
FBgn0003751	trk	24.827	24.8386	24.8154	0.999068	-0.00134467	1	1
FBgn0003861	trp	0.652245	0.509351	0.795138	1.56108	0.642546	0.997356	1
FBgn0003862	trx	17084.9	21329.1	12840.7	0.602026	-0.732102	0.00619855	0.0342193
FBgn0003863	alphaTry	0.127338	0.254675	0	0	#NAME?	1	1
FBgn0003865	tsg	6.38205	9.69381	3.0703	0.316728	-1.65869	0.361574	0.67514
FBgn0003866	tsh	17588.9	13932.4	21245.3	1.52489	0.608701	0.000189653	0.00175145
FBgn0003867	tsl	1789.69	2271.93	1307.45	0.575482	-0.797158	3.18842e-06	4.40256e-05
FBgn0003870	ttk	8510.52	10063.5	6957.52	0.691361	-0.532489	0.00110511	0.00806297
FBgn0003882	tub	2317.68	2060.57	2574.79	1.24955	0.321412	0.0586433	0.193498
FBgn0003884	alphaTub84B	137387	132669	142106	1.07113	0.0991378	0.536154	0.838456
FBgn0003885	alphaTub84D	6521.63	7264	5779.25	0.795602	-0.329882	0.0432807	0.15483
FBgn0003886	alphaTub85E	185.004	207.391	162.618	0.784114	-0.350865	0.832954	1
FBgn0003887	betaTub56D	117695	130250	105140	0.807218	-0.308969	0.0437103	0.155898
FBgn0003888	betaTub60D	9742.92	12413.2	7072.61	0.569764	-0.811564	0.00431146	0.0252525
FBgn0003889	betaTub85D	6.28116	6.1131	6.44921	1.05498	0.0772179	0.946343	1
FBgn0003890	betaTub97EF	263.157	405.268	121.047	0.298683	-1.74332	4.10578e-05	0.000445787
FBgn0003891	tud	23006	21631	24381	1.12713	0.172659	0.31755	0.623776
FBgn0003892	ptc	6457.35	7898.65	5016.06	0.635053	-0.655051	0.00892803	0.0452056
FBgn0003896	tup	2209.02	1946.07	2471.98	1.27024	0.345106	0.193626	0.456419
FBgn0003900	twi	1377.24	1298.92	1455.55	1.12058	0.164243	0.501082	0.808274
FBgn0003916	snRNA:U1:21D	0	0	0	NA	NA	NA	NA
FBgn0003920	snRNA:U2:14B	0.310295	0.62059	0	0	#NAME?	0.932755	1
FBgn0003922	snRNA:U2:38ABa	0	0	0	NA	NA	NA	NA
FBgn0003923	snRNA:U2:38ABb	0	0	0	NA	NA	NA	NA
FBgn0003926	snRNA:U3:22A	0.174183	0	0.348366	Inf	Inf	1	1
FBgn0003930	snRNA:U4:39B	0	0	0	NA	NA	NA	NA
FBgn0003931	snRNA:U4:38AB	0	0	0	NA	NA	NA	NA
FBgn0003933	snRNA:U5:14B	0.265046	0	0.530092	Inf	Inf	0.90136	1
FBgn0003934	snRNA:U5:23D	0	0	0	NA	NA	NA	NA
FBgn0003935	snRNA:U5:34A	0.461854	0.310295	0.613412	1.97687	0.983216	0.997293	1
FBgn0003936	snRNA:U5:35D	0	0	0	NA	NA	NA	NA
FBgn0003938	snRNA:U5:63BC	7.81729	5.10876	10.5258	2.06035	1.04289	0.442031	0.755993
FBgn0003941	RpL40	50939.2	48140.8	53737.7	1.11626	0.158675	0.300706	0.604425
FBgn0003942	RpS27A	80351.4	76712.6	83990.1	1.09487	0.130755	0.492284	0.799018
FBgn0003943	Ubi-p63E	4891.66	5450.09	4333.24	0.795078	-0.330831	0.13687	0.358855
FBgn0003944	Ubx	354.567	496.204	212.93	0.429118	-1.22055	1.19706e-05	0.000147003
FBgn0003950	unc	163.486	213.105	113.866	0.534321	-0.904221	0.00107988	0.00790919
FBgn0003961	Uro	0	0	0	NA	NA	NA	NA
FBgn0003963	ush	3358.86	3712.45	3005.28	0.809514	-0.304871	0.075355	0.234287
FBgn0003964	usp	0	0	0	NA	NA	NA	NA
FBgn0003965	v	2.37268	0.56497	4.18039	7.39931	2.88739	0.365736	0.678918
FBgn0003969	vap	7048.77	6453.49	7644.05	1.18448	0.244258	0.149051	0.381743
FBgn0003975	vg	7696.84	11498.7	3894.98	0.338733	-1.56178	2.2033e-10	5.64804e-09
FBgn0003977	vir	3172.75	3667.1	2678.41	0.730388	-0.453265	0.00789435	0.0411377
FBgn0003978	vls	1231.89	1202.4	1261.38	1.04905	0.0690866	0.711801	0.970313
FBgn0003979	Vm26Aa	1.34221	0.662455	2.02196	3.05223	1.60986	0.753973	0.992995
FBgn0003980	Vm26Ab	1.63889	1.37086	1.90692	1.39104	0.476161	0.932575	1
FBgn0003983	Vm34Ca	16.5193	19.7553	13.2833	0.672391	-0.572628	0.632634	0.911617
FBgn0003984	vn	4221.08	4467.65	3974.51	0.889621	-0.168737	0.362137	0.675418
FBgn0003996	w	0	0	0	NA	NA	NA	NA
FBgn0003997	W	3645.3	3932.64	3357.97	0.853871	-0.22791	0.236539	0.5189
FBgn0004003	wbl	1620.88	2698.82	542.949	0.20118	-2.31344	8.43814e-06	0.000106836
FBgn0004009	wg	2671.08	3871.79	1470.37	0.379765	-1.39682	1.18604e-16	5.97359e-15
FBgn0004028	wupA	204.854	158.861	250.848	1.57904	0.65905	0.406961	0.722707
FBgn0004034	y	0	0	0	NA	NA	NA	NA
FBgn0004045	Yp1	8.67454	7.45177	9.89732	1.32818	0.409455	0.775574	1
FBgn0004047	Yp3	16.7534	19.0244	14.4825	0.761258	-0.393543	0.648006	0.923427
FBgn0004049	yrt	6037.78	7129.57	4945.99	0.69373	-0.527554	0.00134874	0.0094718
FBgn0004050	z	0	0	0	NA	NA	NA	NA
FBgn0004052	Z600	1.02451	0.62059	1.42842	2.30172	1.20271	0.859695	1
FBgn0004053	zen	0	0	0	NA	NA	NA	NA
FBgn0004054	zen2	0	0	0	NA	NA	NA	NA
FBgn0004055	uzip	4520.62	3441.45	5599.78	1.62716	0.702356	1.82904e-05	0.000213382
FBgn0004057	Zw	1539.39	1222.38	1856.39	1.51866	0.602803	0.000721386	0.00559919
FBgn0004066	Pros28.1	7624.34	7803.16	7445.53	0.954168	-0.0676843	0.704873	0.966284
FBgn0004087	Dhfr	1185.08	1207.8	1162.36	0.962377	-0.0553257	0.738071	0.985215
FBgn0004101	bs	3681.15	6087.66	1274.63	0.20938	-2.2558	7.04132e-38	1.76585e-35
FBgn0004102	oc	26.5906	11.7909	41.3904	3.51036	1.81162	0.108378	0.306552
FBgn0004103	Pp1-87B	20465.3	22823.2	18107.4	0.793378	-0.33392	0.0437301	0.155898
FBgn0004106	cdc2	4743.77	5839.39	3648.15	0.62475	-0.67865	4.2205e-05	0.000457374
FBgn0004107	cdc2c	1469.74	1690.35	1249.12	0.738974	-0.436404	0.0893536	0.266037
FBgn0004108	Nrt	2964.04	4205.15	1722.93	0.409719	-1.28729	1.90232e-09	4.37611e-08
FBgn0004110	tin	4.57764	4.85817	4.29712	0.884514	-0.177042	0.969002	1
FBgn0004117	Tm2	250.492	193.132	307.852	1.594	0.672651	0.445931	0.759698
FBgn0004118	nAcRbeta-96A	8.11009	6.70618	9.51399	1.41869	0.504559	0.690309	0.955517
FBgn0004132	boca	2050.14	2217.44	1882.84	0.849104	-0.235987	0.161225	0.402992
FBgn0004133	blow	6694.85	5579.83	7809.87	1.39966	0.485078	0.0106643	0.0519491
FBgn0004143	nullo	0	0	0	NA	NA	NA	NA
FBgn0004167	kst	31107.9	35276.3	26939.5	0.763672	-0.388975	0.301657	0.605166
FBgn0004168	5-HT1A	20.9351	36.9279	4.94226	0.133835	-2.90147	0.0194049	0.0834952
FBgn0004169	up	472.287	369.214	575.359	1.55834	0.640007	0.538245	0.840103
FBgn0004170	sc	0	0	0	NA	NA	NA	NA
FBgn0004171	Mst98Cb	0	0	0	NA	NA	NA	NA
FBgn0004172	Mst84Da	0	0	0	NA	NA	NA	NA
FBgn0004173	Mst84Db	0	0	0	NA	NA	NA	NA
FBgn0004174	Mst84Dc	0.155148	0.310295	0	0	#NAME?	0.998366	1
FBgn0004175	Mst84Dd	0	0	0	NA	NA	NA	NA
FBgn0004177	mts	29274.4	29174	29374.8	1.00688	0.00989758	0.949572	1
FBgn0004179	Csp	6787.59	7055.33	6519.85	0.924103	-0.113874	0.486278	0.794685
FBgn0004181	Peb	0	0	0	NA	NA	NA	NA
FBgn0004183	snRNA:U1:82Eb	4.56363	4.38659	4.74066	1.08071	0.111986	0.950293	1
FBgn0004185	snRNA:U1:95Ca	0	0	0	NA	NA	NA	NA
FBgn0004186	snRNA:U1:95Cb	0	0	0	NA	NA	NA	NA
FBgn0004187	snRNA:U1:95Cc	0	0	0	NA	NA	NA	NA
FBgn0004188	snRNA:U6:96Aa	0	0	0	NA	NA	NA	NA
FBgn0004189	snRNA:U6:96Ab	1.58114	0.875265	2.28701	2.61293	1.38567	0.711498	0.970313
FBgn0004190	snRNA:U6:96Ac	0.655577	1.31115	0	0	#NAME?	0.731607	0.98186
FBgn0004191	snRNA:U2:34ABa	24.4732	20.7591	28.1873	1.35783	0.441302	0.58738	0.878411
FBgn0004192	snRNA:U2:34ABb	1.48723	2.97447	0	0	#NAME?	0.460679	0.771752
FBgn0004197	Ser	13741.9	16418.8	11065	0.673921	-0.569349	0.00435762	0.0254707
FBgn0004198	ct	2413.09	2629.68	2196.5	0.83527	-0.259686	0.206334	0.475513
FBgn0004227	nonA	9943.73	12344.5	7543	0.611043	-0.710654	9.78671e-06	0.000122152
FBgn0004228	mex1	14.502	16.2475	12.7564	0.785133	-0.34899	0.799708	1
FBgn0004237	Hrb87F	25174.1	30603.6	19744.5	0.645169	-0.632251	5.9568e-05	0.000621955
FBgn0004240	Dpt	4.29105	0.819646	7.76246	9.4705	3.24344	0.413747	0.729432
FBgn0004242	Syt1	324.739	152.452	497.027	3.26022	1.70497	0.00896374	0.0453403
FBgn0004244	Rdl	8.24372	7.63618	8.85126	1.15912	0.213033	0.953967	1
FBgn0004359	T48	1545.45	1840.33	1250.58	0.679541	-0.557368	0.00162492	0.0110516
FBgn0004360	Wnt2	967.659	1496.49	438.83	0.29324	-1.76985	9.34005e-10	2.20175e-08
FBgn0004362	HmgD	65222.8	71472.8	58972.9	0.825109	-0.277343	0.0885073	0.26449
FBgn0004363	porin	25063.1	26250.3	23876	0.909553	-0.136771	0.370971	0.685077
FBgn0004364	18w	7151.54	8363.04	5940.05	0.710274	-0.493552	0.00274727	0.0172485
FBgn0004366	rdgC	3.34266	1.01461	5.67071	5.58903	2.4826	0.349821	0.661184
FBgn0004367	mei-41	1378.06	1515.74	1240.38	0.818336	-0.289235	0.0842941	0.255362
FBgn0004368	Ptp4E	5488.29	4169.8	6806.78	1.6324	0.706993	2.49597e-05	0.000282539
FBgn0004369	Ptp99A	5135.52	5923.07	4347.97	0.734073	-0.446005	0.00589784	0.0328927
FBgn0004370	Ptp10D	11103.2	9842.42	12363.9	1.25618	0.329047	0.0422059	0.151916
FBgn0004372	aly	0	0	0	NA	NA	NA	NA
FBgn0004373	fwd	7341.06	8179.36	6502.76	0.79502	-0.330936	0.0366752	0.13732
FBgn0004374	neb	1735.13	1920.29	1549.97	0.807152	-0.309087	0.0988903	0.286086
FBgn0004378	Klp61F	6612.09	6964	6260.18	0.898935	-0.153711	0.375886	0.690082
FBgn0004379	Klp67A	2969.9	3507.95	2431.84	0.693236	-0.528582	0.00186021	0.0123938
FBgn0004380	Klp64D	551.103	415.09	687.115	1.65534	0.727129	0.00720872	0.038215
FBgn0004381	Klp68D	522.107	215.679	828.536	3.84153	1.94168	3.45918e-10	8.5971e-09
FBgn0004387	Klp98A	4410.96	3438.72	5383.21	1.56547	0.646598	0.000104019	0.00102783
FBgn0004389	bnk	0	0	0	NA	NA	NA	NA
FBgn0004390	Gap1	5063.99	5491.61	4636.37	0.844265	-0.244232	0.156745	0.394989
FBgn0004391	shtd	3303.96	3973.12	2634.79	0.663154	-0.592585	0.000432864	0.00363091
FBgn0004394	pdm2	1626.57	2790.63	462.515	0.165738	-2.59302	2.73184e-17	1.48024e-15
FBgn0004395	unk	4893.43	5172.53	4614.33	0.892083	-0.16475	0.310795	0.61604
FBgn0004396	CrebA	4533.86	4908.16	4159.57	0.84748	-0.238749	0.32593	0.634148
FBgn0004397	Vinc	7766.14	4777.9	10754.4	2.25086	1.17048	2.06417e-10	5.33928e-09
FBgn0004400	rhi	0	0	0	NA	NA	NA	NA
FBgn0004401	Pep	36541.2	43585.9	29496.6	0.676746	-0.563314	0.000382017	0.00324488
FBgn0004403	RpS14a	40077.6	36298.6	43856.5	1.20822	0.272879	0.296967	0.600626
FBgn0004404	RpS14b	11506.8	10811.1	12202.5	1.1287	0.174663	0.411021	0.726899
FBgn0004406	tam	1017.97	1006.03	1029.91	1.02374	0.0338526	0.880959	1
FBgn0004407	DNApol-gamma35	0	0	0	NA	NA	NA	NA
FBgn0004414	msopa	0.127338	0.254675	0	0	#NAME?	0.998366	1
FBgn0004419	me31B	11584.7	12834.8	10334.6	0.805203	-0.312575	0.0547608	0.184304
FBgn0004425	LysB	0	0	0	NA	NA	NA	NA
FBgn0004426	LysC	0	0	0	NA	NA	NA	NA
FBgn0004427	LysD	0	0	0	NA	NA	NA	NA
FBgn0004428	LysE	0	0	0	NA	NA	NA	NA
FBgn0004429	LysP	0	0	0	NA	NA	NA	NA
FBgn0004430	LysS	0	0	0	NA	NA	NA	NA
FBgn0004431	LysX	1.45055	2.63606	0.265046	0.100546	-3.31407	0.461746	0.772078
FBgn0004432	Cyp1	54224.5	57206.6	51242.3	0.895742	-0.158845	0.338135	0.648365
FBgn0004435	Galpha49B	6099.75	6058.39	6141.11	1.01365	0.0195645	0.875283	1
FBgn0004436	UbcD6	7694.63	6479.22	8910.04	1.37517	0.459612	0.00367981	0.0221428
FBgn0004449	Ten-m	30924	21644.3	40203.7	1.85748	0.893343	0.00919938	0.0461404
FBgn0004456	mew	10608	10612.8	10603.2	0.999096	-0.00130481	0.972568	1
FBgn0004462	Pk17E	2145.17	2591.44	1698.89	0.655577	-0.609163	0.000433388	0.00363265
FBgn0004463	RpIII128	2167.78	2281.16	2054.41	0.900602	-0.151039	0.395416	0.709923
FBgn0004465	Su(P)	1023.98	816.466	1231.49	1.50832	0.592939	0.00138571	0.00970167
FBgn0004507	GlyP	9079.2	7635.41	10523	1.37818	0.462768	0.0042037	0.0247737
FBgn0004509	Fur1	4946	4884.6	5007.4	1.02514	0.0358229	0.852465	1
FBgn0004510	Ets97D	1005.91	998.793	1013.03	1.01426	0.0204249	0.997221	1
FBgn0004511	dy	92.801	168.879	16.7228	0.0990222	-3.3361	3.56932e-09	7.89323e-08
FBgn0004512	Mdr49	3694.48	2713.01	4675.96	1.72353	0.785368	0.0487608	0.168883
FBgn0004513	Mdr65	70.9169	70.7207	71.1132	1.00555	0.0079857	0.823975	1
FBgn0004514	Oct-TyrR	59.3629	4.60349	114.122	24.7904	4.63171	0.00702831	0.0375205
FBgn0004516	Gad1	1.36314	0.704319	2.02196	2.8708	1.52146	0.742116	0.986469
FBgn0004552	Akh	4.77498	4.37284	5.17713	1.18393	0.243582	0.946913	1
FBgn0004554	Edg91	95.5951	107.213	83.9769	0.783269	-0.35242	0.403867	0.719111
FBgn0004556	Dbp73D	1044.11	967.604	1120.62	1.15814	0.211809	0.230465	0.509948
FBgn0004567	slp2	14.375	4.91379	23.8363	4.8509	2.27825	0.0103818	0.0509642
FBgn0004569	aos	0	0	0	NA	NA	NA	NA
FBgn0004573	5-HT7	0.949505	0.62059	1.27842	2.06001	1.04265	0.80917	1
FBgn0004574	Rop	4221.56	3413.2	5029.92	1.47367	0.559411	0.000824593	0.00625586
FBgn0004575	Syn	4.90391	4.21565	5.59218	1.32653	0.407656	0.807226	1
FBgn0004577	Pxd	43.7154	83.794	3.6369	0.0434029	-4.52607	4.21141e-11	1.20674e-09
FBgn0004580	Cbp53E	5.63077	6.52088	4.74066	0.726996	-0.45998	0.796311	1
FBgn0004581	bgcn	33.5957	35.7385	31.4529	0.880086	-0.184283	0.690313	0.955517
FBgn0004583	ex	33957.2	29477.4	38436.9	1.30395	0.382884	0.0170311	0.076061
FBgn0004584	Rrp1	9289.27	10619.1	7959.48	0.749547	-0.415909	0.011412	0.0546602
FBgn0004587	B52	22951	26366.7	19535.3	0.740908	-0.432633	0.0075251	0.0396033
FBgn0004588	Eig71Ea	0	0	0	NA	NA	NA	NA
FBgn0004589	Eig71Eb	0	0	0	NA	NA	NA	NA
FBgn0004590	Eig71Ec	0	0	0	NA	NA	NA	NA
FBgn0004591	Eig71Ed	0	0	0	NA	NA	NA	NA
FBgn0004592	Eig71Ee	1.40555	2.8111	0	0	#NAME?	0.398292	0.713183
FBgn0004593	Eig71Ef	0	0	0	NA	NA	NA	NA
FBgn0004594	Eig71Eg	0	0	0	NA	NA	NA	NA
FBgn0004595	pros	55.4281	77.7448	33.1113	0.425898	-1.23142	0.0297917	0.116927
FBgn0004597	CycC	823.129	879.393	766.865	0.872039	-0.197535	0.294469	0.597855
FBgn0004598	Fur2	9255.19	9737.3	8773.07	0.900976	-0.15044	0.302341	0.605689
FBgn0004603	Src42A	11323.4	11384.3	11262.6	0.989303	-0.0155152	0.924112	1
FBgn0004606	zfh1	1639.97	1494.84	1785.1	1.19418	0.256015	0.143725	0.371431
FBgn0004607	zfh2	23568	32115.9	15020.1	0.467683	-1.0964	7.9828e-10	1.89745e-08
FBgn0004611	Plc21C	2711.58	2918.24	2504.92	0.858367	-0.220333	0.180224	0.433149
FBgn0004618	gl	9.24146	1.86177	16.6212	8.92761	3.15827	0.00593811	0.0330303
FBgn0004619	Glu-RI	0	0	0	NA	NA	NA	NA
FBgn0004620	GluRIIA	3.72804	3.75574	3.70035	0.985251	-0.0214363	1	1
FBgn0004622	Takr99D	3.17696	2.00521	4.34872	2.16871	1.11684	0.677055	0.944874
FBgn0004623	Gbeta76C	35.7204	30.7743	40.6666	1.32145	0.40212	0.730844	0.981313
FBgn0004624	CaMKII	9845.09	10454.7	9235.53	0.883389	-0.178878	0.461572	0.772078
FBgn0004629	Cys	42.6533	47.6934	37.6132	0.788644	-0.342553	0.484325	0.792512
FBgn0004635	rho	0	0	0	NA	NA	NA	NA
FBgn0004636	R	13895.9	11863.2	15928.6	1.34269	0.425123	0.00822226	0.0424594
FBgn0004638	drk	9422	8210.63	10633.4	1.29507	0.373035	0.0194414	0.0835927
FBgn0004643	mit(1)15	2524.8	2637.85	2411.74	0.914285	-0.129284	0.444989	0.758669
FBgn0004644	hh	1775.15	2697.02	853.278	0.316378	-1.66028	9.38159e-21	6.96491e-19
FBgn0004646	ogre	18832.5	22662.7	15002.4	0.661986	-0.595128	0.000159164	0.00149649
FBgn0004647	N	43337.1	51734.1	34940.1	0.675378	-0.566232	0.0317953	0.122997
FBgn0004648	svr	6452.34	6394.97	6509.7	1.01794	0.025653	0.903438	1
FBgn0004649	yl	1.35492	1.38462	1.32523	0.95711	-0.0632433	1	1
FBgn0004650	fs(1)N	9.61333	4.97907	14.2476	2.86149	1.51677	0.231013	0.510668
FBgn0004652	fru	18247.9	10669.7	25826	2.42049	1.2753	0.00113016	0.00821431
FBgn0004654	Pgd	3053.76	2310.98	3796.53	1.64283	0.716181	1.92114e-05	0.000222989
FBgn0004655	wapl	4815.11	5142.37	4487.84	0.872717	-0.196414	0.240841	0.525083
FBgn0004656	fs(1)h	28245.8	31627.5	24864.1	0.786154	-0.347116	0.0728712	0.228319
FBgn0004657	mys	17651.1	10793.7	24508.6	2.27065	1.1831	1.80431e-13	6.67282e-12
FBgn0004666	sim	3.01978	4.631	1.40855	0.304157	-1.71711	0.537745	0.839552
FBgn0004687	Mlc-c	12135.7	8634.17	15637.3	1.81109	0.856858	9.29404e-08	1.64742e-06
FBgn0004698	mus210	8925.06	9333.79	8516.33	0.912418	-0.132233	0.449635	0.763619
FBgn0004777	Ccp84Ag	0.132523	0	0.265046	Inf	Inf	1	1
FBgn0004778	Ccp84Af	0	0	0	NA	NA	NA	NA
FBgn0004779	Ccp84Ae	0	0	0	NA	NA	NA	NA
FBgn0004780	Ccp84Ad	0	0	0	NA	NA	NA	NA
FBgn0004781	Ccp84Ac	0	0	0	NA	NA	NA	NA
FBgn0004782	Ccp84Ab	0.282485	0.56497	0	0	#NAME?	0.918984	1
FBgn0004783	Ccp84Aa	1.36882	2.73763	0	0	#NAME?	0.42611	0.742299
FBgn0004784	inaC	0	0	0	NA	NA	NA	NA
FBgn0004795	retn	4.26495	5.70801	2.82189	0.494373	-1.01633	0.20895	0.479415
FBgn0004797	mdy	1006.09	1135.47	876.718	0.77212	-0.373103	0.0469102	0.164246
FBgn0004811	fs(2)ltoPP43	2180.65	2258.94	2102.37	0.930688	-0.103631	0.485802	0.794021
FBgn0004828	His3.3B	41977.8	45467	38488.6	0.846516	-0.24039	0.121326	0.330503
FBgn0004832	Xpac	926.444	1035.54	817.348	0.789296	-0.341361	0.0745202	0.232263
FBgn0004837	Su(H)	1058.97	1126.91	991.032	0.879425	-0.185368	0.286909	0.588593
FBgn0004838	Hrb27C	79376.2	84876.7	73875.8	0.87039	-0.200266	0.174777	0.424318
FBgn0004839	otk	3415.83	3955.17	2876.49	0.727275	-0.459428	0.0287432	0.113631
FBgn0004841	Takr86C	6.81437	13.0471	0.581688	0.0445839	-4.48733	0.0416634	0.150658
FBgn0004842	NepYr	0.793285	1.05648	0.530092	0.501754	-0.994949	1	1
FBgn0004852	Ac76E	583.637	47.8341	1119.44	23.4025	4.54859	1.42829e-62	1.1664e-59
FBgn0004854	B-H2	266.22	357.754	174.685	0.488283	-1.03421	0.00463927	0.0268833
FBgn0004855	RpII15	1651.82	1730.94	1572.69	0.908577	-0.138319	0.425172	0.741004
FBgn0004856	Bx42	3912.83	4029.3	3796.36	0.94219	-0.0859104	0.604821	0.892018
FBgn0004858	elB	3729.53	4557.21	2901.85	0.636759	-0.651181	0.000178203	0.00166183
FBgn0004859	ci	23973.5	22844	25103.1	1.0989	0.136055	0.360481	0.673904
FBgn0004860	ph-d	1769.76	2148.33	1391.19	0.647567	-0.626899	0.000413806	0.00348897
FBgn0004861	ph-p	5075.21	5938.9	4211.52	0.709142	-0.495853	0.00213861	0.0140199
FBgn0004862	bap	0.127338	0.254675	0	0	#NAME?	0.998366	1
FBgn0004863	C15	255.684	340.939	170.429	0.499881	-1.00034	0.000328944	0.00284243
FBgn0004864	hop	3512.61	3981.72	3043.5	0.764368	-0.387661	0.0158523	0.0719204
FBgn0004865	Eip78C	1292.67	2200.12	385.218	0.175089	-2.51384	0.000118918	0.00115513
FBgn0004867	RpS2	96928.6	91929.8	101927	1.10875	0.148937	0.372753	0.68677
FBgn0004868	Gdi	14714.4	15362.5	14066.4	0.915631	-0.127162	0.411102	0.726899
FBgn0004870	bab1	149.874	200.363	99.385	0.496024	-1.01152	0.0049697	0.0284519
FBgn0004872	piwi	115.437	101.561	129.314	1.27326	0.34853	0.313911	0.620387
FBgn0004875	enc	7530.76	8672.36	6389.17	0.736728	-0.440797	0.00715942	0.0380077
FBgn0004876	cdi	9241.1	5875.05	12607.2	2.14588	1.10157	2.72338e-05	0.000305259
FBgn0004878	cas	43.0197	28.6168	57.4227	2.0066	1.00476	0.229281	0.508511
FBgn0004880	scrt	7.04281	11.0035	3.08215	0.280107	-1.83595	0.193489	0.456398
FBgn0004882	orb	28.2511	35.7935	20.7086	0.578559	-0.789464	0.17147	0.418891
FBgn0004885	tok	14519.1	18243.9	10794.2	0.591664	-0.75715	1.99477e-06	2.88092e-05
FBgn0004888	Scsalpha	5865.38	5750.68	5980.09	1.03989	0.056434	0.687093	0.953341
FBgn0004889	tws	11414.9	12450.8	10379.1	0.833606	-0.262562	0.115445	0.319739
FBgn0004892	sob	3182.31	1781.77	4582.85	2.57207	1.36293	2.11215e-15	9.43288e-14
FBgn0004893	bowl	15838.3	22495.2	9181.37	0.408148	-1.29283	1.86907e-15	8.4463e-14
FBgn0004895	fd64A	1.04702	0.764026	1.33002	1.7408	0.79975	0.992603	1
FBgn0004896	fd59A	8.99603	3.3342	14.6578	4.39621	2.13626	0.139686	0.364172
FBgn0004897	fd96Ca	2.34645	4.42786	0.265046	0.0598587	-4.06229	0.0486444	0.168638
FBgn0004898	fd96Cb	16.6337	24.1065	9.16084	0.380015	-1.39587	0.0116198	0.0555622
FBgn0004901	Prat	2595.18	2815.02	2375.34	0.84381	-0.24501	0.135918	0.356901
FBgn0004903	Rb97D	2454.69	2731.91	2177.47	0.797051	-0.327256	0.0472583	0.164878
FBgn0004907	14-3-3zeta	58854.6	51178.2	66531.1	1.29999	0.3785	0.0166053	0.0745965
FBgn0004908	Arf84F	673.706	644.359	703.054	1.09109	0.125771	0.548125	0.848113
FBgn0004910	Eip63F-1	120.902	83.9233	157.881	1.88125	0.911692	0.00783713	0.0409141
FBgn0004911	Eip63F-2	0.174183	0	0.348366	Inf	Inf	1	1
FBgn0004913	Gnf1	4085.68	4401.94	3769.42	0.856308	-0.223797	0.195105	0.458884
FBgn0004914	Hnf4	1747.5	1643.06	1851.95	1.12714	0.172661	0.406316	0.722096
FBgn0004915	TfIIB	2499.73	2728.8	2270.67	0.832111	-0.265152	0.106868	0.303406
FBgn0004919	gol	56.3025	13.9264	98.6786	7.08572	2.82491	1.76422e-07	2.99708e-06
FBgn0004921	Ggamma1	12353.4	11218.2	13488.6	1.20238	0.265893	0.090117	0.267638
FBgn0004924	Top1	11417.2	12676.5	10157.8	0.801304	-0.319579	0.0406654	0.148066
FBgn0004926	eIF-2beta	11820.9	10855.8	12786	1.17781	0.236102	0.145813	0.375456
FBgn0004956	os	1371.8	329.165	2414.44	7.33505	2.87481	8.67922e-17	4.4698e-15
FBgn0004957	por	1356.51	1531.34	1181.69	0.771666	-0.373951	0.0355724	0.134402
FBgn0004959	phm	99.8006	65.4485	134.153	2.04975	1.03544	0.00469824	0.02717
FBgn0005198	gig	2777.86	3119.38	2436.34	0.781033	-0.356544	0.0356884	0.134662
FBgn0005278	Sam-S	22304.2	17828.1	26780.3	1.50213	0.587014	0.000191749	0.00176511
FBgn0005322	nmd	1746.22	1595.33	1897.1	1.18915	0.249936	0.13887	0.362571
FBgn0005355	Su(fu)	1557.48	1755.96	1358.99	0.773927	-0.36973	0.041279	0.149586
FBgn0005386	ash1	2729.89	3125.52	2334.25	0.746834	-0.42114	0.00899973	0.045417
FBgn0005390	fs(1)M3	1.9648	1.38462	2.54499	1.83805	0.878174	0.895948	1
FBgn0005391	Yp2	8.78483	12.2742	5.29541	0.431424	-1.21282	0.377112	0.691669
FBgn0005410	sno	3483.61	3743.87	3223.36	0.860968	-0.215968	0.17647	0.427093
FBgn0005411	U2af50	5660.15	5961.77	5358.52	0.898814	-0.153905	0.342995	0.654121
FBgn0005427	ewg	3052.28	3350.2	2754.35	0.822145	-0.282535	0.200421	0.466162
FBgn0005533	RpS17	44324.5	41843	46805.9	1.11861	0.161703	0.336028	0.6459
FBgn0005536	Mbs	6557.41	7610.75	5504.06	0.723196	-0.467542	0.00432784	0.0253225
FBgn0005558	ey	19.0977	23.0655	15.1299	0.655952	-0.608337	0.307158	0.611564
FBgn0005561	sv	13.1956	21.6226	4.76855	0.220536	-2.18092	5.30339e-07	8.4448e-06
FBgn0005564	Shal	71.8055	90.019	53.5919	0.59534	-0.748214	0.0849071	0.256471
FBgn0005585	Crc	47244.3	46949.2	47539.4	1.01257	0.018023	0.958226	1
FBgn0005586	Rab3	21.068	25.061	17.075	0.681336	-0.553562	0.491824	0.798497
FBgn0005590	scw	0	0	0	NA	NA	NA	NA
FBgn0005592	btl	308.189	399.878	216.501	0.541416	-0.88519	0.00095186	0.00710817
FBgn0005593	RpL7	89395.5	80908.3	97882.7	1.2098	0.274767	0.0715905	0.225108
FBgn0005596	yemalpha	2571.2	2753.16	2389.24	0.867817	-0.204538	0.21721	0.491463
FBgn0005612	Sox14	1626.57	1076.4	2176.73	2.02223	1.01594	3.63506e-08	6.75767e-07
FBgn0005613	Sox15	5265.96	6957.75	3574.17	0.513696	-0.961013	3.93163e-07	6.37592e-06
FBgn0005614	trpl	1.71214	0.930885	2.49339	2.67852	1.42144	0.695863	0.958839
FBgn0005616	msl-2	1730.38	1511.66	1949.1	1.28937	0.36667	0.0334093	0.127706
FBgn0005617	msl-1	3157.86	3393.1	2922.63	0.861347	-0.215334	0.185325	0.442619
FBgn0005619	Hdc	17.489	22.5968	12.3811	0.547915	-0.867976	0.383021	0.696675
FBgn0005624	Psc	4206.28	5066.45	3346.1	0.660442	-0.598496	0.012629	0.0596807
FBgn0005626	ple	966.779	321.916	1611.64	5.0064	2.32377	0.066489	0.211805
FBgn0005630	lola	35024.3	34669.4	35379.2	1.02047	0.0292387	0.939772	1
FBgn0005631	robo	4507.86	5069.53	3946.18	0.778412	-0.361395	0.0264209	0.106363
FBgn0005632	faf	13506.7	15009.7	12003.7	0.799733	-0.32241	0.093928	0.275814
FBgn0005633	fln	0	0	0	NA	NA	NA	NA
FBgn0005634	zip	103716	65935.2	141496	2.14599	1.10164	2.11335e-05	0.000242833
FBgn0005636	nvy	2070.24	720.901	3419.58	4.74348	2.24595	1.51819e-08	3.00822e-07
FBgn0005638	slbo	14.1296	12.2968	15.9625	1.2981	0.376404	0.786199	1
FBgn0005640	Eip63E	5381.7	5725.45	5037.95	0.879922	-0.184552	0.45928	0.771038
FBgn0005642	wdn	2631.75	2805.84	2457.65	0.875904	-0.191156	0.236038	0.518468
FBgn0005648	Pabp2	12930.6	12746.6	13114.6	1.02887	0.0410648	0.852548	1
FBgn0005649	Rox8	9463.39	10493.3	8433.45	0.803696	-0.315278	0.0511875	0.175043
FBgn0005654	lat	0	0	0	NA	NA	NA	NA
FBgn0005655	mus209	8698.11	9320.01	8076.21	0.866545	-0.206654	0.235811	0.518069
FBgn0005658	Ets65A	0.680054	0.56497	0.795138	1.4074	0.49303	0.998114	1
FBgn0005659	Ets98B	673.445	625.755	721.136	1.15243	0.204674	0.382073	0.695801
FBgn0005660	Ets21C	1346.78	141.347	2552.21	18.0563	4.17443	1.91894e-31	3.42801e-29
FBgn0005664	Cry	0.556196	0.764026	0.348366	0.455961	-1.13302	0.944375	1
FBgn0005666	bt	406.416	198.169	614.663	3.10172	1.63307	0.132268	0.351134
FBgn0005670	Cyp4d1	14.2686	13.216	15.3212	1.15929	0.213241	0.860245	1
FBgn0005671	Vha55	7418.49	6177.75	8659.24	1.40168	0.487158	0.00287341	0.0179224
FBgn0005672	spi	7859.78	4954.39	10765.2	2.17285	1.11959	3.04294e-06	4.2272e-05
FBgn0005674	Aats-glupro	13405.9	14451.6	12360.3	0.855295	-0.225506	0.289913	0.592366
FBgn0005677	dac	1048.4	1785.06	311.729	0.174632	-2.51761	2.30372e-36	5.06509e-34
FBgn0005683	pie	553.065	498.565	607.565	1.21863	0.285255	0.170504	0.417693
FBgn0005694	Aef1	2193.94	2374.49	2013.39	0.847926	-0.237989	0.164746	0.408591
FBgn0005695	gcl	776.836	665.483	888.189	1.33465	0.416465	0.036084	0.135618
FBgn0005696	DNApol-alpha73	1097.22	1048.94	1145.5	1.09205	0.127043	0.464814	0.775345
FBgn0005771	noc	4697.69	5602.02	3793.37	0.677144	-0.562466	0.00132813	0.00934434
FBgn0005775	Con	86.7231	104.688	68.7577	0.656785	-0.606508	0.157066	0.395536
FBgn0005777	PpD3	3212.09	3217.53	3206.65	0.99662	-0.00488469	0.976999	1
FBgn0005778	PpD5	0	0	0	NA	NA	NA	NA
FBgn0005779	PpD6	0	0	0	NA	NA	NA	NA
FBgn0008635	betaCop	9512.51	10297.5	8727.52	0.847538	-0.23865	0.139706	0.364172
FBgn0008636	hbn	0.984749	0.509351	1.46015	2.86668	1.51938	0.864563	1
FBgn0008646	E5	2226.43	1830.07	2622.79	1.43316	0.519203	0.0379717	0.14086
FBgn0008651	lbl	22.6097	14.2157	31.0037	2.18095	1.12496	0.0101339	0.0500049
FBgn0008654	Su(z)2	1392	1910.07	873.926	0.457536	-1.12804	1.42823e-08	2.83982e-07
FBgn0010014	CanB	15.8639	18.9316	12.7962	0.675917	-0.565082	0.747056	0.989108
FBgn0010015	CanA1	9.22979	11.2137	7.2459	0.646166	-0.630023	0.666637	0.936437
FBgn0010019	Cyp4g1	0	0	0	NA	NA	NA	NA
FBgn0010038	GstD2	56.6339	20.2641	93.0037	4.58958	2.19836	0.00424088	0.0249414
FBgn0010039	GstD3	6176.79	3236.56	9117.01	2.81688	1.4941	1.00324e-14	4.2015e-13
FBgn0010040	GstD4	44.3752	35.2923	53.4581	1.51472	0.599054	0.351849	0.663373
FBgn0010041	GstD5	79.7607	22.2439	137.278	6.17148	2.62562	0.0163511	0.0736864
FBgn0010042	GstD6	41.2783	7.76206	74.7945	9.63591	3.26842	1.3117e-05	0.000159031
FBgn0010043	GstD7	5.71469	3.59855	7.83082	2.17611	1.12175	0.50104	0.808274
FBgn0010044	GstD8	0.9451	0.56497	1.32523	2.34566	1.23	0.888225	1
FBgn0010051	Itp-r83A	6604.57	6752.6	6456.53	0.956155	-0.0646833	0.733766	0.982937
FBgn0010052	Jhe	0.607487	0	1.21497	Inf	Inf	0.611639	0.895259
FBgn0010053	Jheh1	634.842	491.426	778.259	1.58368	0.663277	0.00113614	0.00824208
FBgn0010078	RpL23	71601.4	65421.6	77781.2	1.18892	0.249656	0.140836	0.365823
FBgn0010097	gammaTub37C	4.5833	4.04261	5.12398	1.26749	0.341978	0.897903	1
FBgn0010100	Acon	11547.4	11342.4	11752.4	1.03615	0.0512345	0.718958	0.975766
FBgn0010105	comm	792.403	949.562	635.245	0.668987	-0.579949	0.020918	0.0882492
FBgn0010109	dpn	1116.78	1566.93	666.635	0.42544	-1.23297	0.000179432	0.0016692
FBgn0010113	hdc	21239.4	25644.2	16834.5	0.656463	-0.607214	0.0524197	0.178235
FBgn0010114	hig	21.8613	27.5364	16.1862	0.587811	-0.766575	0.352924	0.664522
FBgn0010173	RpA-70	7614.88	7543.33	7686.43	1.01897	0.027113	0.82462	1
FBgn0010194	Wnt5	4211.17	5085.77	3336.58	0.656061	-0.608097	0.000236794	0.0021317
FBgn0010197	Gyc32E	9.04306	13.6589	4.42725	0.32413	-1.62536	0.304163	0.607848
FBgn0010198	RpS15Aa	36325.8	32425.2	40226.4	1.24059	0.311026	0.0988771	0.286086
FBgn0010213	Sod2	2873.82	2876.19	2871.44	0.998348	-0.00238503	0.969378	1
FBgn0010215	alpha-Cat	11600.5	12937.4	10263.5	0.793317	-0.33403	0.0372795	0.138878
FBgn0010217	ATPsyn-beta	40009.5	41166.4	38852.6	0.943795	-0.0834549	0.668322	0.938227
FBgn0010220	Dbp45A	1452.72	1285.74	1619.71	1.25975	0.333141	0.0639339	0.205787
FBgn0010222	Nmdmc	2647.87	2037.42	3258.32	1.59924	0.677384	6.30113e-05	0.000651953
FBgn0010223	Galpha73B	27.1898	35.6817	18.6979	0.52402	-0.932306	0.24651	0.532064
FBgn0010225	Gel	3088.73	2410.57	3766.89	1.56266	0.644	0.00050679	0.00413276
FBgn0010226	GstS1	19776.7	27869.5	11683.9	0.419237	-1.25416	7.70023e-15	3.26062e-13
FBgn0010228	HmgZ	12604.3	13490.9	11717.8	0.868574	-0.20328	0.203432	0.470845
FBgn0010235	Klc	5047.84	4207.2	5888.48	1.39962	0.485037	0.00264412	0.0167388
FBgn0010238	Lac	18273.8	15653.3	20894.3	1.33482	0.416648	0.00852399	0.043565
FBgn0010240	Lcch3	46.7583	64.4048	29.1118	0.452013	-1.14556	0.0154179	0.0701442
FBgn0010241	Mdr50	36.5212	48.5976	24.4447	0.503002	-0.991365	0.302449	0.605799
FBgn0010246	Myo61F	4746.96	3593.99	5899.93	1.64161	0.71511	1.85055e-05	0.000215452
FBgn0010247	Parp	5266.74	8199.24	2334.25	0.28469	-1.81253	3.39912e-13	1.21825e-11
FBgn0010258	Rbp4	85.0731	86.8768	83.2694	0.958477	-0.0611839	0.934934	1
FBgn0010263	Rbp9	43.3837	32.6627	54.1046	1.65646	0.728108	0.200501	0.466205
FBgn0010265	RpS13	72200.4	67517.1	76883.7	1.13873	0.187424	0.295674	0.598665
FBgn0010269	Dsor1	1351.77	1420.32	1283.22	0.903469	-0.146453	0.403851	0.719111
FBgn0010278	Ssrp	11824.1	12293.9	11354.2	0.923558	-0.114725	0.477873	0.785915
FBgn0010280	Taf4	9818.95	10309.7	9328.23	0.904805	-0.144322	0.357974	0.671377
FBgn0010282	TfIIFalpha	2927.84	3287.67	2568	0.7811	-0.35642	0.0308155	0.119753
FBgn0010287	Trf	707.711	702.63	712.792	1.01446	0.0207173	0.929281	1
FBgn0010288	Uch	4841.5	4018.26	5664.74	1.40975	0.495439	0.00244167	0.0157094
FBgn0010292	bys	2634.94	2803.3	2466.58	0.879882	-0.184617	0.295472	0.598657
FBgn0010294	ng2	0	0	0	NA	NA	NA	NA
FBgn0010295	ng3	0	0	0	NA	NA	NA	NA
FBgn0010296	ng4	0	0	0	NA	NA	NA	NA
FBgn0010300	brat	21554.6	25487.7	17621.6	0.691375	-0.532459	0.00207664	0.0136686
FBgn0010303	hep	4855.41	4933.5	4777.31	0.968343	-0.0464104	0.767973	1
FBgn0010309	pigeon	674.017	704.029	644.005	0.914742	-0.128563	0.467392	0.77828
FBgn0010313	corto	5393.08	6738.04	4048.12	0.600786	-0.735078	6.36077e-06	8.26395e-05
FBgn0010314	Cks30A	3474.36	4563.82	2384.89	0.522565	-0.936318	2.21989e-08	4.3017e-07
FBgn0010315	CycD	2701.39	2850.45	2552.34	0.895417	-0.159368	0.320393	0.627236
FBgn0010316	dap	4103.67	4486.22	3721.12	0.829457	-0.269762	0.118223	0.324931
FBgn0010317	CycJ	7.95065	9.56941	6.33189	0.66168	-0.595794	0.734238	0.982937
FBgn0010323	Gsc	1.9481	1.53772	2.35848	1.53375	0.617063	0.708946	0.969322
FBgn0010328	woc	20949	24648	17250.1	0.699856	-0.51487	0.00117208	0.00847591
FBgn0010329	Tbh	121.173	29.6192	212.726	7.18205	2.8444	2.35168e-10	6.0015e-09
FBgn0010333	Rac1	6106.27	5770.97	6441.58	1.1162	0.158601	0.329225	0.638728
FBgn0010339	128up	3646.58	3865.13	3428.03	0.886913	-0.173136	0.289688	0.592274
FBgn0010340	140up	543.104	510.495	575.712	1.12775	0.173452	0.372819	0.68677
FBgn0010341	Cdc42	12638.6	11512.2	13765	1.19569	0.257849	0.0994998	0.287558
FBgn0010342	Map60	0	0	0	NA	NA	NA	NA
FBgn0010348	Arf79F	30282.1	29865.7	30698.6	1.02789	0.0396878	0.816086	1
FBgn0010350	CdsA	1196.68	1159.12	1234.25	1.06482	0.0906037	0.702196	0.964233
FBgn0010352	Nc73EF	7949.27	6243.28	9655.27	1.54651	0.629012	0.000104104	0.00102783
FBgn0010355	Taf1	7798.28	8975.05	6621.5	0.737768	-0.438761	0.00943574	0.0471704
FBgn0010356	Taf5	1609.18	1792.69	1425.68	0.795276	-0.330472	0.0656169	0.209611
FBgn0010357	betaTry	0.387198	0.509351	0.265046	0.52036	-0.942417	1	1
FBgn0010358	deltaTry	0	0	0	NA	NA	NA	NA
FBgn0010359	gammaTry	0	0	0	NA	NA	NA	NA
FBgn0010379	Akt1	8404.37	8173.07	8635.67	1.0566	0.0794301	0.622166	0.904185
FBgn0010380	Bap	6149.54	5974.55	6324.54	1.05858	0.082131	0.598764	0.887689
FBgn0010381	Drs	59.8392	12.6949	106.984	8.42729	3.07507	0.0326455	0.125647
FBgn0010382	CycE	3426.65	3841.48	3011.82	0.784027	-0.351024	0.0434579	0.155267
FBgn0010383	Cyp18a1	1418.72	116.985	2720.45	23.2548	4.53946	1.47149e-07	2.53367e-06
FBgn0010385	Def	0	0	0	NA	NA	NA	NA
FBgn0010387	Dbi	5.64494	3.73441	7.55548	2.02321	1.01664	0.433622	0.749221
FBgn0010388	Dro	20.0019	3.56137	36.4424	10.2327	3.35511	0.000532212	0.00431239
FBgn0010389	htl	1391.97	1349.07	1434.88	1.06361	0.088965	0.631979	0.911411
FBgn0010391	Gtp-bp	4062.15	4153.33	3970.98	0.956096	-0.0647725	0.671767	0.940408
FBgn0010395	betaInt-nu	46.474	13.7174	79.2306	5.77593	2.53005	4.23003e-05	0.000457571
FBgn0010397	LamC	0	0	0	NA	NA	NA	NA
FBgn0010398	Lrr47	371.916	367.393	376.44	1.02462	0.0350957	0.854875	1
FBgn0010399	Nmdar1	28.7079	12.3758	45.0401	3.63936	1.86368	0.0042896	0.0251625
FBgn0010401	Os-C	66.8505	87.8074	45.8935	0.522661	-0.936053	0.104154	0.297476
FBgn0010403	Os-E	0	0	0	NA	NA	NA	NA
FBgn0010406	RNaseX25	1392.8	1373.44	1412.16	1.02819	0.0401066	0.778937	1
FBgn0010407	Ror	84.1806	75.5477	92.8135	1.22854	0.296947	0.466847	0.777619
FBgn0010408	RpS9	85488.8	73011	97966.6	1.34181	0.424178	0.00777868	0.0406461
FBgn0010409	RpL18A	63547.6	57160.5	69934.8	1.22348	0.290991	0.12435	0.336176
FBgn0010411	RpS18	70275	60787.6	79762.3	1.31215	0.391929	0.0527114	0.178987
FBgn0010412	RpS19a	49379.3	45715.3	53043.2	1.16029	0.21449	0.164923	0.40866
FBgn0010414	SerT	143.186	122.429	163.944	1.3391	0.421263	0.295192	0.598657
FBgn0010415	Sdc	16482	19002.7	13961.4	0.734708	-0.444757	0.00675834	0.0365161
FBgn0010416	TH1	3314.48	3247.06	3381.91	1.04153	0.0587002	0.740069	0.985998
FBgn0010417	Taf6	2410.27	2454.93	2365.6	0.963612	-0.0534754	0.835194	1
FBgn0010421	TfIIFbeta	1064.84	1134.63	995.059	0.876993	-0.189363	0.29972	0.603688
FBgn0010422	TfIIS	3967.81	4296.84	3638.77	0.846849	-0.239823	0.164243	0.408037
FBgn0010423	TpnC47D	30.9376	16.4033	45.472	2.77213	1.47099	0.44175	0.755993
FBgn0010424	TpnC73F	211.021	153.948	268.094	1.74146	0.800297	0.530312	0.833868
FBgn0010425	epsilonTry	0	0	0	NA	NA	NA	NA
FBgn0010431	mtrm	0	0	0	NA	NA	NA	NA
FBgn0010433	ato	17.986	28.1508	7.82125	0.277834	-1.84771	0.387903	0.702057
FBgn0010434	cora	26040.4	24144.8	27936.1	1.15702	0.210418	0.340506	0.6508
FBgn0010435	emp	8868.15	7673.47	10062.8	1.31138	0.391087	0.0147709	0.0677546
FBgn0010438	mtSSB	1367.42	1336.6	1398.24	1.04612	0.0650489	0.71911	0.975855
FBgn0010441	pll	0	0	0	NA	NA	NA	NA
FBgn0010452	trn	4943.1	6985.82	2900.38	0.415181	-1.26819	9.86216e-12	2.99878e-10
FBgn0010453	Wnt4	386.357	464.756	307.959	0.662625	-0.593734	0.0011954	0.00862273
FBgn0010470	Fkbp13	4621.89	6452.3	2791.48	0.432634	-1.20878	0.000539902	0.00436851
FBgn0010473	tutl	5149	7208.84	3089.16	0.428524	-1.22255	2.59378e-11	7.68255e-10
FBgn0010482	l(2)01289	59.2276	33.3808	85.0744	2.5486	1.34971	0.115742	0.320328
FBgn0010488	NAT1	31801.5	33931.9	29671.1	0.874429	-0.193586	0.333142	0.642729
FBgn0010497	dmGlut	506.132	715.306	296.959	0.415149	-1.2683	4.98607e-09	1.07154e-07
FBgn0010501	Dcp-1	0	0	0	NA	NA	NA	NA
FBgn0010504	kermit	0	0	0	NA	NA	NA	NA
FBgn0010516	wal	3208.93	2906.22	3511.63	1.20831	0.272995	0.100578	0.290013
FBgn0010520	Bka	880.369	770.681	990.057	1.28465	0.361376	0.0442826	0.157426
FBgn0010531	CCS	562.795	485.556	640.033	1.31814	0.398508	0.0676132	0.214463
FBgn0010548	Aldh-III	5250.59	5640.99	4860.19	0.861584	-0.214937	0.201582	0.467998
FBgn0010549	l(2)03659	1203.61	445.799	1961.42	4.39978	2.13743	3.91139e-30	6.29844e-28
FBgn0010551	l(2)03709	9014.41	8484.41	9544.41	1.12494	0.169843	0.263973	0.557136
FBgn0010575	sbb	20389.2	25874.2	14904.1	0.576022	-0.795805	0.0109581	0.0531315
FBgn0010583	dock	2702.2	3030.95	2373.45	0.783071	-0.352784	0.0384522	0.142365
FBgn0010590	Prosbeta1	4860.48	5064.64	4656.32	0.919378	-0.121271	0.504569	0.812385
FBgn0010591	Sply	1652.15	1624.2	1680.1	1.03442	0.0488157	0.809256	1
FBgn0010602	lwr	11262.6	12762.2	9762.97	0.764993	-0.386482	0.0173684	0.0772659
FBgn0010607	l(2)05714	884.277	896.159	872.396	0.973484	-0.0387711	0.788841	1
FBgn0010611	Hmgs	2698.91	1824.3	3573.52	1.95884	0.970001	1.6548e-08	3.26196e-07
FBgn0010612	l(2)06225	4940.45	4905.55	4975.35	1.01423	0.0203836	0.953044	1
FBgn0010620	Sip1	18425.4	14880.6	21970.3	1.47644	0.562125	0.000361593	0.00309072
FBgn0010621	Cct5	21813.4	20694.1	22932.8	1.10818	0.148195	0.334226	0.643734
FBgn0010622	l(2)06496	1327.64	1174.45	1480.83	1.26086	0.334413	0.055866	0.187035
FBgn0010638	Sec61beta	8481.05	8687.47	8274.62	0.952477	-0.0702432	0.678073	0.945876
FBgn0010651	l(2)08717	1598.45	1698.43	1498.47	0.882271	-0.180706	0.594636	0.884872
FBgn0010660	Nup214	8022.93	10195.9	5849.95	0.573754	-0.801495	1.02979e-06	1.55529e-05
FBgn0010704	l(2)s5379	5269.34	5450.38	5088.31	0.933569	-0.099172	0.527971	0.831604
FBgn0010709	Atg6	972.779	915.081	1030.48	1.12611	0.171343	0.370617	0.684756
FBgn0010741	l(3)01239	5571.49	4998.51	6144.47	1.22926	0.297789	0.0703642	0.222076
FBgn0010747	Srp54k	4906.43	5329.98	4482.87	0.841067	-0.249707	0.113408	0.316552
FBgn0010750	atms	2962.74	3174.34	2751.15	0.866685	-0.20642	0.232769	0.513655
FBgn0010762	simj	6097.88	7322.58	4873.17	0.6655	-0.58749	0.000391711	0.00331736
FBgn0010768	sqz	1787.85	2147.17	1428.54	0.665315	-0.587891	0.00103661	0.00762652
FBgn0010770	ppan	1735.23	1668.15	1802.3	1.08042	0.111586	0.523705	0.828837
FBgn0010772	Xe7	5390.15	6174.85	4605.45	0.74584	-0.423063	0.0100903	0.0498542
FBgn0010774	Ref1	10641.2	11772.8	9509.68	0.807769	-0.307985	0.0535213	0.180824
FBgn0010786	l(3)02640	1188.14	927.819	1448.46	1.56114	0.642604	0.000504161	0.00411719
FBgn0010803	Aats-trp	2495.2	1849.14	3141.26	1.69877	0.764492	1.08451e-05	0.000134482
FBgn0010808	l(3)03670	2248.54	2047.73	2449.35	1.19613	0.258377	0.11549	0.319785
FBgn0010812	unc-45	3140.8	2750.93	3530.67	1.28345	0.360023	0.0374484	0.139325
FBgn0010825	Gug	11568.4	13864.9	9271.83	0.668727	-0.580511	0.000274409	0.00241147
FBgn0010830	l(3)04053	1324.72	1563.33	1086.12	0.694747	-0.52544	0.00293953	0.018275
FBgn0010877	l(3)05822	4009.98	2890.47	5129.5	1.77463	0.827515	7.56301e-07	1.17165e-05
FBgn0010894	sinu	8226.64	6734.95	9718.32	1.44297	0.529039	0.000741745	0.00572054
FBgn0010905	Spn	1862.71	2234.44	1490.98	0.667274	-0.583648	0.0180679	0.0795112
FBgn0010909	msn	17800.7	15857.9	19743.6	1.24503	0.316184	0.047035	0.16445
FBgn0010926	l(3)07882	2662.23	2822.19	2502.26	0.886637	-0.173584	0.305949	0.610066
FBgn0011016	SsRbeta	5899.58	5927.35	5871.82	0.990632	-0.0135793	0.896495	1
FBgn0011020	Sas-4	1358.03	1494.53	1221.53	0.817334	-0.291003	0.0947238	0.277473
FBgn0011202	dia	5331.96	3850.99	6812.93	1.76914	0.823045	0.000478797	0.00394387
FBgn0011204	cue	0	0	0	NA	NA	NA	NA
FBgn0011205	fbl	2242.11	2011.89	2472.34	1.22886	0.297325	0.0880555	0.263544
FBgn0011206	bol	480.633	531.011	430.256	0.810258	-0.303547	0.178537	0.43005
FBgn0011207	pelo	2303.4	2244.25	2362.54	1.05271	0.0741053	0.706992	0.968029
FBgn0011211	blw	34752.8	36753.3	32752.3	0.89114	-0.166276	0.314297	0.620936
FBgn0011217	eff	27865.4	29169.7	26561.1	0.910572	-0.135155	0.393932	0.708148
FBgn0011224	heph	36151.5	42115.1	30187.8	0.716794	-0.48037	0.00272572	0.017132
FBgn0011225	jar	13935.1	16257.1	11613.2	0.714346	-0.485304	0.0334897	0.12797
FBgn0011227	ox	1560.82	1446.48	1675.16	1.15809	0.211749	0.367403	0.681015
FBgn0011230	poe	23329.1	27234.3	19423.9	0.713215	-0.48759	0.224669	0.501785
FBgn0011232	scat	1358.05	1315.33	1400.76	1.06495	0.0907851	0.668862	0.938439
FBgn0011236	ken	3492.46	2973.49	4011.44	1.34907	0.431961	0.218332	0.493415
FBgn0011239	ms(2)35Ci	0.397569	0	0.795138	Inf	Inf	0.877392	1
FBgn0011241	cbx	5.52203	5.70184	5.34222	0.936929	-0.0939877	1	1
FBgn0011244	Hsp60B	0.503514	0.310295	0.696732	2.24539	1.16696	1	1
FBgn0011259	Sema-1a	2499.91	3707.28	1292.55	0.348651	-1.52015	6.05569e-08	1.09549e-06
FBgn0011260	Sema-2a	22843.3	25801.2	19885.3	0.770712	-0.375736	0.0203564	0.0864862
FBgn0011270	Pglym87	0.310295	0.62059	0	0	#NAME?	0.932755	1
FBgn0011272	RpL13	59985.7	52793.9	67177.6	1.27245	0.347608	0.023631	0.0969133
FBgn0011273	And	0	0	0	NA	NA	NA	NA
FBgn0011274	Dif	802.197	252.912	1351.48	5.34368	2.41783	9.16527e-18	5.18745e-16
FBgn0011276	HLH3B	24.3583	22.4413	26.2753	1.17085	0.227551	0.906535	1
FBgn0011277	HLH4C	1.16442	1.4821	0.846735	0.571307	-0.807662	0.951355	1
FBgn0011278	lbe	0.306706	0	0.613412	Inf	Inf	0.747315	0.989108
FBgn0011279	Pbprp1	0	0	0	NA	NA	NA	NA
FBgn0011280	Pbprp2	3.60602	2.59829	4.61376	1.77569	0.828383	0.703241	0.96493
FBgn0011281	Pbprp3	0.155148	0.310295	0	0	#NAME?	0.998366	1
FBgn0011282	Pbprp4	12.5921	15.4003	9.78383	0.6353	-0.65449	0.403813	0.719111
FBgn0011283	Pbprp5	0	0	0	NA	NA	NA	NA
FBgn0011284	RpS4	76140.9	69923	82358.7	1.17785	0.236154	0.110672	0.311576
FBgn0011286	Rya-r44F	70.917	53.8961	87.9378	1.63162	0.706304	0.203198	0.4707
FBgn0011288	Snap25	905.98	842.585	969.374	1.15048	0.20223	0.520799	0.826165
FBgn0011289	TfIIA-L	3298.26	3325.64	3270.88	0.983534	-0.0239535	0.865695	1
FBgn0011290	Taf12	1528.1	1528.86	1527.34	0.999004	-0.00143819	0.998188	1
FBgn0011291	Taf11	868.073	866.777	869.368	1.00299	0.00430662	0.997576	1
FBgn0011293	a10	0.64787	0.662455	0.633285	0.955967	-0.0649668	1	1
FBgn0011294	a5	0	0	0	NA	NA	NA	NA
FBgn0011296	l(2)efl	72.0247	100.223	43.8269	0.437296	-1.19332	0.422621	0.73834
FBgn0011297	l(2)not	553.038	437.639	668.437	1.52737	0.61105	0.00194776	0.0129169
FBgn0011300	babo	7115.52	7714.85	6516.19	0.844629	-0.24361	0.118474	0.32533
FBgn0011305	Rsf1	5724.68	7251.93	4197.44	0.578803	-0.788855	1.47361e-06	2.17391e-05
FBgn0011327	Uch-L3	5371.49	6463.79	4279.2	0.662027	-0.595038	0.000242014	0.00217186
FBgn0011335	l(3)j2D3	1222.49	1326.54	1118.45	0.843129	-0.246174	0.184697	0.441304
FBgn0011336	OstStt3	12659.2	13804.6	11513.9	0.834058	-0.26178	0.0962647	0.280727
FBgn0011361	mtacp1	3601.67	3115.94	4087.39	1.31177	0.391514	0.016705	0.0749819
FBgn0011455	l(3)neo18	2162.54	2037.36	2287.73	1.12289	0.167222	0.316214	0.622659
FBgn0011474	pr-set7	3824.73	4533.03	3116.42	0.687493	-0.540584	0.000882577	0.00665162
FBgn0011476	l(3)neo43	259.556	224.436	294.676	1.31296	0.392825	0.113326	0.316545
FBgn0011481	Ssdp	10713.2	12777.4	8648.96	0.676893	-0.563	0.00038416	0.00325824
FBgn0011509	SrpRbeta	1976.9	1780.64	2173.17	1.22044	0.287402	0.103923	0.296964
FBgn0011554	etaTry	0.35216	0.704319	0	0	#NAME?	0.825155	1
FBgn0011555	thetaTry	0	0	0	NA	NA	NA	NA
FBgn0011556	zetaTry	0	0	0	NA	NA	NA	NA
FBgn0011559	Acp36DE	0	0	0	NA	NA	NA	NA
FBgn0011566	Bzd	586.559	602.885	570.233	0.945841	-0.080331	0.754405	0.992995
FBgn0011569	can	1.16991	1.99145	0.348366	0.174931	-2.51514	0.64738	0.923417
FBgn0011570	cpb	6533.87	5602.27	7465.47	1.33258	0.414221	0.0107453	0.0522993
FBgn0011571	caz	16004	18453.8	13554.3	0.734501	-0.445164	0.00405892	0.0240569
FBgn0011573	Cdc37	5451.82	5359.45	5544.2	1.03447	0.0488951	0.803458	1
FBgn0011576	Cyp4d2	347.532	387.617	307.448	0.793175	-0.334289	0.131735	0.350166
FBgn0011581	Dms	5.02528	8.64201	1.40855	0.162989	-2.61716	0.154303	0.391164
FBgn0011582	DopR	0.445992	0.310295	0.581688	1.87463	0.906606	0.997353	1
FBgn0011584	Trp1	4850.03	4674.66	5025.4	1.07503	0.104376	0.551508	0.850195
FBgn0011586	e(r)	3669.3	3460.72	3877.88	1.12054	0.164192	0.332117	0.641568
FBgn0011589	elk	50.7397	83.5959	17.8835	0.213928	-2.2248	0.431707	0.747721
FBgn0011591	fng	8215.14	9379.07	7051.21	0.751802	-0.411574	0.0112182	0.0539629
FBgn0011592	fra	12251.5	11796.2	12706.7	1.07719	0.107274	0.724397	0.978055
FBgn0011596	fzo	0	0	0	NA	NA	NA	NA
FBgn0011603	ine	32.5919	27.5338	37.6499	1.36741	0.451441	0.397792	0.712734
FBgn0011604	Iswi	12194.8	13988.2	10401.5	0.74359	-0.427422	0.00961893	0.0478919
FBgn0011606	Klp3A	4951.81	5975.46	3928.16	0.657382	-0.605195	0.000254519	0.00226277
FBgn0011638	La	10625	10272.3	10977.8	1.06868	0.0958302	0.576672	0.869457
FBgn0011640	lark	8998.04	9509.71	8486.38	0.892391	-0.164252	0.345946	0.657191
FBgn0011642	Zyx	4769	5216.07	4321.94	0.828583	-0.271283	0.276492	0.575065
FBgn0011648	Mad	4154.67	4794.96	3514.38	0.732931	-0.448251	0.00599814	0.0333058
FBgn0011653	mas	4103.96	5189.56	3018.37	0.581623	-0.781844	0.00177678	0.0119283
FBgn0011655	Med	1866.98	2045.44	1688.52	0.825505	-0.276652	0.104879	0.299024
FBgn0011656	Mef2	2877.55	3153.22	2601.88	0.825147	-0.277276	0.108231	0.306217
FBgn0011659	Mlh1	1114.9	915.236	1314.56	1.43631	0.522369	0.00374604	0.0224939
FBgn0011660	Pms2	1597.08	1867.51	1326.65	0.710383	-0.493331	0.00483047	0.0278221
FBgn0011661	Moe	52404.3	41619	63189.7	1.51829	0.602445	0.000131659	0.00125963
FBgn0011666	msi	1182.77	1489.42	876.107	0.588218	-0.765577	0.00642273	0.0350339
FBgn0011668	Mst57Da	0	0	0	NA	NA	NA	NA
FBgn0011669	Mst57Db	0	0	0	NA	NA	NA	NA
FBgn0011670	Mst57Dc	0	0	0	NA	NA	NA	NA
FBgn0011672	Mvl	1752.95	1803.13	1702.77	0.944338	-0.0826242	0.506162	0.813917
FBgn0011674	insc	3144	867.429	5420.56	6.249	2.64363	1.23398e-36	2.7663e-34
FBgn0011676	Nos	288.306	44.0785	532.533	12.0815	3.59473	3.6758e-31	6.36749e-29
FBgn0011692	pav	7355.38	8163.95	6546.81	0.801917	-0.318475	0.0571535	0.189677
FBgn0011693	Pdh	9.31331	12.5076	6.11903	0.489226	-1.03143	0.293151	0.59585
FBgn0011694	PebII	0	0	0	NA	NA	NA	NA
FBgn0011695	PebIII	48.0531	60.3731	35.7332	0.591873	-0.756641	0.180964	0.434109
FBgn0011701	repo	29.4737	34.0638	24.8837	0.730502	-0.45304	0.602371	0.890141
FBgn0011703	RnrL	9601.99	10044.1	9159.88	0.911966	-0.132947	0.426797	0.74271
FBgn0011704	RnrS	6356.92	6943.39	5770.45	0.831072	-0.266955	0.11149	0.312959
FBgn0011705	rost	663.287	878.766	447.807	0.509586	-0.972601	1.51938e-06	2.23566e-05
FBgn0011706	rpr	934.249	815.436	1053.06	1.29141	0.368947	0.515252	0.821142
FBgn0011708	Syx5	2173.32	1896.13	2450.51	1.29237	0.37002	0.0328648	0.126258
FBgn0011710	Sep1	11266.7	9283.83	13249.5	1.42716	0.513151	0.00145232	0.0100797
FBgn0011715	Snr1	3333.32	3774.83	2891.8	0.766074	-0.384443	0.0200813	0.085568
FBgn0011722	Tig	5395.32	659.595	10131	15.3595	3.94106	6.61113e-12	2.04838e-10
FBgn0011723	byn	0.442818	0.62059	0.265046	0.427087	-1.2274	1	1
FBgn0011725	twin	4619.74	4983.61	4255.86	0.853971	-0.227741	0.187162	0.445785
FBgn0011726	tsr	40325.6	35852.6	44798.5	1.24952	0.321372	0.0505986	0.173617
FBgn0011737	wee	1665.57	1736.89	1594.25	0.917877	-0.123628	0.476176	0.784577
FBgn0011739	wts	5445.95	4587.08	6304.83	1.37448	0.458882	0.00640511	0.0349906
FBgn0011740	alpha-Man-II	3694.8	4701.37	2688.23	0.571798	-0.806422	8.51557e-07	1.30858e-05
FBgn0011741	Actr13E	2704.6	2738.48	2670.73	0.975263	-0.0361371	0.792369	1
FBgn0011742	Arp14D	7707.22	7517.05	7897.38	1.0506	0.0712086	0.674799	0.943309
FBgn0011743	Arp53D	0.174183	0	0.348366	Inf	Inf	1	1
FBgn0011745	Arp87C	5034.48	4298.01	5770.95	1.3427	0.425141	0.00913984	0.0458717
FBgn0011746	ana	1098.16	2026.98	169.344	0.0835448	-3.58131	5.77195e-26	6.22553e-24
FBgn0011747	Ank	19603.6	18522	20685.2	1.11679	0.159356	0.301102	0.604689
FBgn0011754	PhKgamma	3989.68	4283.27	3696.09	0.862913	-0.212714	0.170637	0.417839
FBgn0011758	B-H1	245.548	370.771	120.325	0.324527	-1.62359	5.72628e-06	7.54246e-05
FBgn0011760	ctp	25582.1	27735.1	23429.1	0.844745	-0.243411	0.110208	0.310652
FBgn0011761	dhd	2.41977	3.69603	1.1435	0.309387	-1.69251	0.631865	0.911411
FBgn0011762	DNApol-alpha50	790.766	790.3	791.232	1.00118	0.00170027	0.863694	1
FBgn0011763	Dp	9020.43	10066.2	7974.69	0.792226	-0.336016	0.0351204	0.133178
FBgn0011764	Dsp1	17990	20334.1	15646	0.769445	-0.37811	0.0184032	0.0803398
FBgn0011766	E2f	12176	12424.9	11927.2	0.959944	-0.0589782	0.697873	0.960605
FBgn0011768	Fdh	7464.27	7947.55	6980.99	0.878382	-0.187079	0.250251	0.536997
FBgn0011769	Fdxh	384.541	218.032	551.05	2.52738	1.33764	1.4771e-07	2.53951e-06
FBgn0011770	Gip	805.274	1024.96	585.587	0.571326	-0.807614	3.58289e-05	0.000393876
FBgn0011771	Hem	4630.58	4384.03	4877.12	1.11248	0.153773	0.333593	0.643165
FBgn0011774	Irbp	812.182	530.356	1094.01	2.06278	1.04459	2.92752e-08	5.5691e-07
FBgn0011785	BRWD3	9236.75	10481.4	7992.1	0.762504	-0.391184	0.0390253	0.144067
FBgn0011787	mRpL12	1576.37	1656.58	1496.15	0.903157	-0.146951	0.433738	0.749308
FBgn0011802	Gem3	1127.85	1193.28	1062.42	0.890339	-0.167573	0.329723	0.639211
FBgn0011812	Lcp1Psi	2.34767	2.57018	2.12516	0.826852	-0.2743	0.952572	1
FBgn0011817	nmo	5819.64	7193.85	4445.43	0.617948	-0.694442	0.0385237	0.142584
FBgn0011818	oaf	2290.53	2221.68	2359.38	1.06198	0.0867551	0.556532	0.853957
FBgn0011822	pcl	0	0	0	NA	NA	NA	NA
FBgn0011823	Pen	23252.7	26943	19562.4	0.726066	-0.461827	0.00441687	0.0257468
FBgn0011824	CG4038	0	0	0	NA	NA	NA	NA
FBgn0011826	Pp2B-14D	3417.96	3606.78	3229.15	0.895302	-0.159554	0.308862	0.613485
FBgn0011828	Pxn	1108.81	657.672	1559.94	2.37191	1.24605	0.0206616	0.0875228
FBgn0011829	Ret	432.838	63.9051	801.772	12.5463	3.64919	7.27147e-17	3.77885e-15
FBgn0011832	Ser12	0	0	0	NA	NA	NA	NA
FBgn0011834	Ser6	0.441126	0.35216	0.530092	1.50526	0.590014	1	1
FBgn0011836	Taf2	3280.74	3732.94	2828.55	0.757726	-0.400252	0.0176851	0.0782485
FBgn0011837	Tis11	5023.16	5776.81	4269.52	0.739079	-0.4362	0.00632949	0.0347241
FBgn0011840	tRNA:A:90C	0	0	0	NA	NA	NA	NA
FBgn0011844	tRNA:D2:69F	0	0	0	NA	NA	NA	NA
FBgn0011845	tRNA:D:96A	0	0	0	NA	NA	NA	NA
FBgn0011848	tRNA:E4:56Fa	0	0	0	NA	NA	NA	NA
FBgn0011849	tRNA:E4:56Fb	0	0	0	NA	NA	NA	NA
FBgn0011850	tRNA:E4:56Fc	0	0	0	NA	NA	NA	NA
FBgn0011851	tRNA:E4:62Aa	0	0	0	NA	NA	NA	NA
FBgn0011852	tRNA:E4:62Ab	0	0	0	NA	NA	NA	NA
FBgn0011853	tRNA:E4:62Ac	0	0	0	NA	NA	NA	NA
FBgn0011854	tRNA:E4:62Ad	0	0	0	NA	NA	NA	NA
FBgn0011855	tRNA:E4:62Ae	0	0	0	NA	NA	NA	NA
FBgn0011858	tRNA:F2:89BC	0	0	0	NA	NA	NA	NA
FBgn0011859	tRNA:G3:22BCa	0	0	0	NA	NA	NA	NA
FBgn0011860	tRNA:G3:22BCb	0.155148	0.310295	0	0	#NAME?	0.999752	1
FBgn0011861	tRNA:G3:28D	0	0	0	NA	NA	NA	NA
FBgn0011862	tRNA:G3:35Ba	0	0	0	NA	NA	NA	NA
FBgn0011863	tRNA:G3:35Bb	0	0	0	NA	NA	NA	NA
FBgn0011864	tRNA:G3:35Bc	0.439229	0	0.878458	Inf	Inf	0.866839	1
FBgn0011865	tRNA:G3:35Bd	0	0	0	NA	NA	NA	NA
FBgn0011866	tRNA:G3:35Be	0	0	0	NA	NA	NA	NA
FBgn0011867	tRNA:G3:53E	0	0	0	NA	NA	NA	NA
FBgn0011868	tRNA:G3:55E	0.35216	0.704319	0	0	#NAME?	0.925121	1
FBgn0011869	tRNA:G3:56EFa	0	0	0	NA	NA	NA	NA
FBgn0011870	tRNA:G3:56EFb	0	0	0	NA	NA	NA	NA
FBgn0011871	tRNA:G3:57BCa	0.174183	0	0.348366	Inf	Inf	1	1
FBgn0011872	tRNA:G3:57BCb	1.0102	0.310295	1.71011	5.51123	2.46237	0.806726	1
FBgn0011877	tRNA:HPsi	1.54285	3.08571	0	0	#NAME?	0.450154	0.763693
FBgn0011878	tRNA:H:48F	0.519721	0.509351	0.530092	1.04072	0.0575831	1	1
FBgn0011879	tRNA:H:56E	0.132523	0	0.265046	Inf	Inf	1	1
FBgn0011880	tRNA:I:42A	0	0	0	NA	NA	NA	NA
FBgn0011881	tRNA:I:49Fa	0	0	0	NA	NA	NA	NA
FBgn0011882	tRNA:I:49Fb	0	0	0	NA	NA	NA	NA
FBgn0011883	tRNA:I:49Fc	0	0	0	NA	NA	NA	NA
FBgn0011884	tRNA:I:49Fd	0	0	0	NA	NA	NA	NA
FBgn0011885	tRNA:I:49Fe	0	0	0	NA	NA	NA	NA
FBgn0011887	tRNA:K2:42Aa	0	0	0	NA	NA	NA	NA
FBgn0011888	tRNA:K2:42Ab	0	0	0	NA	NA	NA	NA
FBgn0011889	tRNA:K2:42Ac	0	0	0	NA	NA	NA	NA
FBgn0011890	tRNA:K2:42Ad	0	0	0	NA	NA	NA	NA
FBgn0011891	tRNA:K2:42Ae	0	0	0	NA	NA	NA	NA
FBgn0011892	tRNA:K2:42Ea	0	0	0	NA	NA	NA	NA
FBgn0011893	tRNA:K2:42Eb	0	0	0	NA	NA	NA	NA
FBgn0011894	tRNA:K2:42Ec	0	0	0	NA	NA	NA	NA
FBgn0011895	tRNA:K2:42Ed	0	0	0	NA	NA	NA	NA
FBgn0011896	tRNA:K2:50C	0	0	0	NA	NA	NA	NA
FBgn0011897	tRNA:K2:56EF	0	0	0	NA	NA	NA	NA
FBgn0011902	tRNA:K5:29A	0	0	0	NA	NA	NA	NA
FBgn0011904	tRNA:K5:84ABa	0	0	0	NA	NA	NA	NA
FBgn0011905	tRNA:K5:87BC	0	0	0	NA	NA	NA	NA
FBgn0011906	tRNA:L2:44EF	0	0	0	NA	NA	NA	NA
FBgn0011909	tRNA:L3:49Fa	0	0	0	NA	NA	NA	NA
FBgn0011910	tRNA:L3:49Fb	0	0	0	NA	NA	NA	NA
FBgn0011915	tRNA:M2:48Ba	0	0	0	NA	NA	NA	NA
FBgn0011916	tRNA:M2:48Bb	0	0	0	NA	NA	NA	NA
FBgn0011919	tRNA:M2:83F	0.174183	0	0.348366	Inf	Inf	1	1
FBgn0011921	tRNA:M3:46A	0	0	0	NA	NA	NA	NA
FBgn0011927	tRNA:M3:70Fa	0	0	0	NA	NA	NA	NA
FBgn0011928	tRNA:M3:70Fb	0	0	0	NA	NA	NA	NA
FBgn0011931	tRNA:N5:42Aa	0	0	0	NA	NA	NA	NA
FBgn0011932	tRNA:N5:42Ab	0	0	0	NA	NA	NA	NA
FBgn0011933	tRNA:N5:42Ac	0	0	0	NA	NA	NA	NA
FBgn0011934	tRNA:N5:42Ad	0	0	0	NA	NA	NA	NA
FBgn0011935	tRNA:N5:42Ae	0	0	0	NA	NA	NA	NA
FBgn0011936	tRNA:N5:42Af	0	0	0	NA	NA	NA	NA
FBgn0011937	tRNA:N5:42Ag	0	0	0	NA	NA	NA	NA
FBgn0011938	tRNA:N5:42Ah	0	0	0	NA	NA	NA	NA
FBgn0011944	tRNA:P:90Ca	0	0	0	NA	NA	NA	NA
FBgn0011945	tRNA:P:90Cb	0	0	0	NA	NA	NA	NA
FBgn0011948	tRNA:R:12Ea	0	0	0	NA	NA	NA	NA
FBgn0011949	tRNA:R:12Eb	0	0	0	NA	NA	NA	NA
FBgn0011950	tRNA:R:12Ec	0	0	0	NA	NA	NA	NA
FBgn0011951	tRNA:R:12Ed	0	0	0	NA	NA	NA	NA
FBgn0011952	tRNA:R:12Ee	0	0	0	NA	NA	NA	NA
FBgn0011953	tRNA:R:12Ef	0	0	0	NA	NA	NA	NA
FBgn0011954	tRNA:R:19F	0	0	0	NA	NA	NA	NA
FBgn0011955	tRNA:R2:42Aa	0	0	0	NA	NA	NA	NA
FBgn0011956	tRNA:R2:42Ab	0	0	0	NA	NA	NA	NA
FBgn0011957	tRNA:R2:42Ac	0	0	0	NA	NA	NA	NA
FBgn0011958	tRNA:R2:42Ad	0	0	0	NA	NA	NA	NA
FBgn0011959	tRNA:R2:84Fa	0.127338	0.254675	0	0	#NAME?	0.999432	1
FBgn0011960	tRNA:R2:84Fb	0	0	0	NA	NA	NA	NA
FBgn0011961	tRNA:R2:84Fc	0	0	0	NA	NA	NA	NA
FBgn0011962	tRNA:R2:84Fd	0.127338	0.254675	0	0	#NAME?	1	1
FBgn0011963	tRNA:R2:84Fe	0.55589	0	1.11178	Inf	Inf	0.724409	0.978055
FBgn0011965	tRNA:R:83AB	0	0	0	NA	NA	NA	NA
FBgn0011966	tRNA:R:85Ca	0	0	0	NA	NA	NA	NA
FBgn0011970	tRNA:S2b:86A	0	0	0	NA	NA	NA	NA
FBgn0011971	tRNA:S2b:88A	0	0	0	NA	NA	NA	NA
FBgn0011974	tRNA:S474:12Eh	0	0	0	NA	NA	NA	NA
FBgn0011975	tRNA:S4:12Ea	0	0	0	NA	NA	NA	NA
FBgn0011976	tRNA:S4:12Eb	0	0	0	NA	NA	NA	NA
FBgn0011977	tRNA:S4:12Ee	0	0	0	NA	NA	NA	NA
FBgn0011980	tRNA:S774:12Ec	0.174183	0	0.348366	Inf	Inf	1	1
FBgn0011981	tRNA:S774:12Ef	0.265046	0	0.530092	Inf	Inf	0.866669	1
FBgn0011982	tRNA:S7:12Ed	0.254675	0.509351	0	0	#NAME?	0.798856	1
FBgn0011983	tRNA:S7:12Eg	0	0	0	NA	NA	NA	NA
FBgn0011984	tRNA:S7:23Ea	0	0	0	NA	NA	NA	NA
FBgn0011985	tRNA:S7:23Eb	1.51827	2.45485	0.581688	0.236955	-2.07732	0.57948	0.871517
FBgn0011986	tRNA:S7:64D	0	0	0	NA	NA	NA	NA
FBgn0011987	tRNA:SeC	1.78881	2.9642	0.613412	0.20694	-2.27271	0.567831	0.862268
FBgn0011993	tRNA:T:90Ca	0	0	0	NA	NA	NA	NA
FBgn0011994	tRNA:T:90Cb	0	0	0	NA	NA	NA	NA
FBgn0011998	tRNA:V3b:84Da	0	0	0	NA	NA	NA	NA
FBgn0011999	tRNA:V3b:84Db	0	0	0	NA	NA	NA	NA
FBgn0012000	tRNA:V3b:84Dc	0	0	0	NA	NA	NA	NA
FBgn0012001	tRNA:V3b:84Dd	0	0	0	NA	NA	NA	NA
FBgn0012002	tRNA:V3b:90BC	0	0	0	NA	NA	NA	NA
FBgn0012003	tRNA:V3b:92Ba	0	0	0	NA	NA	NA	NA
FBgn0012004	tRNA:V3b:92Bb	0.47179	0.310295	0.633285	2.04091	1.02921	1	1
FBgn0012009	tRNA:V4:70BCa	0	0	0	NA	NA	NA	NA
FBgn0012010	tRNA:V4:70BCb	0	0	0	NA	NA	NA	NA
FBgn0012011	tRNA:V4:89BC	0	0	0	NA	NA	NA	NA
FBgn0012016	tRNA:Y1:22Fa	0.174183	0	0.348366	Inf	Inf	1	1
FBgn0012017	tRNA:Y1:22Fb	1.26339	1.86177	0.665008	0.357192	-1.48523	0.751377	0.992251
FBgn0012018	tRNA:Y1:28C	0	0	0	NA	NA	NA	NA
FBgn0012024	tRNA:Y1:85Aa	0	0	0	NA	NA	NA	NA
FBgn0012025	tRNA:Y1:85Ab	0	0	0	NA	NA	NA	NA
FBgn0012026	tRNA:Y1:85Ac	0	0	0	NA	NA	NA	NA
FBgn0012027	tRNA:Y1:85Ad	0	0	0	NA	NA	NA	NA
FBgn0012028	tRNA:Y1:85Ae	0.132523	0	0.265046	Inf	Inf	1	1
FBgn0012034	AcCoAS	3455.65	257.258	6654.04	25.8652	4.69294	2.23738e-123	1.279e-119
FBgn0012036	Aldh	0	0	0	NA	NA	NA	NA
FBgn0012037	Ance	14295.6	21932.2	6659.08	0.303621	-1.71966	1.49169e-07	2.56073e-06
FBgn0012042	AttA	10.0606	4.23758	15.8837	3.7483	1.90624	0.115351	0.319704
FBgn0012051	CalpA	4835.55	2886.12	6784.98	2.3509	1.23321	6.53774e-10	1.5736e-08
FBgn0012058	Cdc27	2677.62	2750.33	2604.91	0.947125	-0.0783727	0.596151	0.886089
FBgn0012344	Dh44	1.9302	0.606835	3.25357	5.36154	2.42265	0.310152	0.615512
FBgn0013263	Trl	20.1823	18.8361	21.5284	1.14294	0.192744	0.859926	1
FBgn0013269	FK506-bp1	15393.7	16844.6	13942.8	0.82773	-0.272768	0.0845486	0.255929
FBgn0013272	Gp150	52484	47057.2	57910.8	1.23065	0.299418	0.0523109	0.17805
FBgn0013275	Hsp70Aa	6.02525	2.0374	10.0131	4.91463	2.29708	0.419018	0.734534
FBgn0013276	Hsp70Ab	2956.22	2612.28	3300.17	1.26333	0.337227	0.869145	1
FBgn0013277	Hsp70Ba	18.4066	14.8365	21.9767	1.48126	0.566826	0.682253	0.949276
FBgn0013278	Hsp70Bb	3029.52	2398.32	3660.71	1.52636	0.610097	0.695845	0.958839
FBgn0013279	Hsp70Bc	1056.56	798.321	1314.81	1.64697	0.719811	0.647267	0.92341
FBgn0013300	Mst35Ba	0	0	0	NA	NA	NA	NA
FBgn0013301	Mst35Bb	0	0	0	NA	NA	NA	NA
FBgn0013303	Nca	1850.45	1916.86	1784.03	0.930703	-0.103608	0.550765	0.850195
FBgn0013305	Nmda1	4015.36	2581.23	5449.49	2.1112	1.07806	7.82652e-11	2.15098e-09
FBgn0013307	Odc1	2.18326	1.57958	2.78693	1.76434	0.819131	0.807437	1
FBgn0013308	Odc2	0.855053	0	1.71011	Inf	Inf	0.694607	0.958185
FBgn0013323	Ptth	18.0967	3.10764	33.0858	10.6466	3.41232	0.00710408	0.0377636
FBgn0013325	RpL11	53433.5	46836.8	60030.2	1.28169	0.358045	0.0208504	0.0881268
FBgn0013334	Sap47	3864.22	3763.02	3965.41	1.05378	0.0755789	0.649599	0.92489
FBgn0013342	n-syb	30.5921	21.1106	40.0735	1.89826	0.924679	0.191687	0.453552
FBgn0013343	Syx1A	0	0	0	NA	NA	NA	NA
FBgn0013347	TfIIA-S	3153.41	3627.79	2679.04	0.738476	-0.437376	0.00822001	0.0424594
FBgn0013348	TpnC41C	2.57327	2.24613	2.90042	1.2913	0.368823	0.940565	1
FBgn0013432	bcn92	796.568	652.26	940.876	1.44249	0.528557	0.00861375	0.0438668
FBgn0013433	beat-Ia	1.13503	0.86151	1.40855	1.63498	0.709271	0.923423	1
FBgn0013435	cdc2rk	646.289	761.93	530.649	0.696455	-0.521899	0.00958056	0.0477275
FBgn0013442	fos28F	0	0	0	NA	NA	NA	NA
FBgn0013467	igl	8.00989	13.5145	2.50524	0.185374	-2.43149	0.129715	0.346907
FBgn0013469	klu	2889.37	4819.86	958.873	0.198942	-2.32958	1.14148e-17	6.39735e-16
FBgn0013531	MED20	723.546	723.049	724.043	1.00137	0.00198183	0.970156	1
FBgn0013548	l(2)dtl	1243.47	1344.56	1142.38	0.849635	-0.235085	0.190377	0.451289
FBgn0013563	pex1	568.38	585.681	551.078	0.940919	-0.087858	0.689139	0.955086
FBgn0013576	l(3)82Fd	6418.5	7477.84	5359.17	0.716674	-0.480611	0.00300815	0.0185904
FBgn0013672	mt:ATPase6	1528.5	1621.62	1435.37	0.885148	-0.17601	0.730008	0.980866
FBgn0013673	mt:ATPase8	0	0	0	NA	NA	NA	NA
FBgn0013674	mt:CoI	69527.3	66835.7	72218.9	1.08054	0.111757	0.768901	1
FBgn0013675	mt:CoII	10235.4	9291.82	11179.1	1.20311	0.266766	0.568233	0.862535
FBgn0013676	mt:CoIII	28372.6	26220.7	30524.4	1.16413	0.219255	0.611306	0.895061
FBgn0013678	mt:Cyt-b	1324.94	1127.74	1522.13	1.34972	0.432664	0.462117	0.772199
FBgn0013679	mt:ND1	2315.56	2398.4	2232.72	0.930924	-0.103264	0.825654	1
FBgn0013680	mt:ND2	358.18	361.727	354.633	0.980387	-0.028577	0.984872	1
FBgn0013681	mt:ND3	0.155148	0.310295	0	0	#NAME?	0.999341	1
FBgn0013683	mt:ND4L	0	0	0	NA	NA	NA	NA
FBgn0013684	mt:ND5	1222.01	1216.26	1227.77	1.00947	0.0135978	0.942507	1
FBgn0013685	mt:ND6	32.8907	26.924	38.8574	1.44322	0.529294	0.758983	0.996328
FBgn0013686	mt:lrRNA	2094.18	2319.96	1868.39	0.805354	-0.312305	0.873725	1
FBgn0013687	mt:ori	2.62148	2.17266	3.0703	1.41315	0.498912	0.861521	1
FBgn0013688	mt:srRNA	0	0	0	NA	NA	NA	NA
FBgn0013689	mt:tRNA:A	0.652245	0.509351	0.795138	1.56108	0.642546	0.990725	1
FBgn0013690	mt:tRNA:C	0	0	0	NA	NA	NA	NA
FBgn0013691	mt:tRNA:D	0	0	0	NA	NA	NA	NA
FBgn0013692	mt:tRNA:E	0	0	0	NA	NA	NA	NA
FBgn0013693	mt:tRNA:F	0	0	0	NA	NA	NA	NA
FBgn0013694	mt:tRNA:G	0	0	0	NA	NA	NA	NA
FBgn0013695	mt:tRNA:H	0	0	0	NA	NA	NA	NA
FBgn0013696	mt:tRNA:I	0	0	0	NA	NA	NA	NA
FBgn0013697	mt:tRNA:K	0	0	0	NA	NA	NA	NA
FBgn0013698	mt:tRNA:L:CUN	0	0	0	NA	NA	NA	NA
FBgn0013699	mt:tRNA:L:UUR	0	0	0	NA	NA	NA	NA
FBgn0013700	mt:tRNA:M	0	0	0	NA	NA	NA	NA
FBgn0013701	mt:tRNA:N	0	0	0	NA	NA	NA	NA
FBgn0013702	mt:tRNA:P	0	0	0	NA	NA	NA	NA
FBgn0013703	mt:tRNA:Q	0	0	0	NA	NA	NA	NA
FBgn0013704	mt:tRNA:R	0	0	0	NA	NA	NA	NA
FBgn0013705	mt:tRNA:S:AGY	0	0	0	NA	NA	NA	NA
FBgn0013706	mt:tRNA:S:UCN	0	0	0	NA	NA	NA	NA
FBgn0013707	mt:tRNA:T	0	0	0	NA	NA	NA	NA
FBgn0013708	mt:tRNA:V	0	0	0	NA	NA	NA	NA
FBgn0013709	mt:tRNA:W	0	0	0	NA	NA	NA	NA
FBgn0013710	mt:tRNA:Y	0	0	0	NA	NA	NA	NA
FBgn0013717	not	2267.21	2733.13	1801.3	0.659062	-0.601515	0.00033798	0.00291296
FBgn0013718	nuf	8925.26	7908.93	9941.58	1.25701	0.329993	0.0368234	0.137492
FBgn0013720	pck	7194.33	6017.27	8371.38	1.39122	0.476354	0.00343694	0.0208442
FBgn0013725	phyl	59.3476	103.063	15.6324	0.151679	-2.72091	0.0048818	0.0280471
FBgn0013726	pnut	14981.2	13097.6	16864.8	1.28763	0.364715	0.0218834	0.0916459
FBgn0013732	sced	1305.62	1211.84	1399.4	1.15478	0.207613	0.26687	0.561488
FBgn0013733	shot	46149.1	30852.8	61445.4	1.99157	0.993903	0.0629203	0.203556
FBgn0013746	alien	3865.49	4133.99	3596.99	0.870101	-0.200746	0.229728	0.509127
FBgn0013749	Arf102F	3918.49	3689.04	4147.94	1.12439	0.169148	0.289056	0.591618
FBgn0013750	Arf51F	4130.45	3297.9	4963	1.5049	0.589663	0.000404316	0.00341399
FBgn0013751	Awh	221.331	151.062	291.6	1.93033	0.948849	0.0804579	0.246351
FBgn0013753	Bgb	2083.58	2582.42	1584.73	0.613661	-0.704486	2.32686e-05	0.000264969
FBgn0013755	Bro	2.5746	4.21914	0.930054	0.220437	-2.18156	0.413678	0.729432
FBgn0013756	Mtor	15186.6	18864.5	11508.8	0.610074	-0.712943	0.000980519	0.00728887
FBgn0013759	CASK	3898.12	3917.06	3879.18	0.990331	-0.0140176	0.911227	1
FBgn0013762	Cdk5	909.667	724.079	1095.26	1.51262	0.59705	0.00175718	0.0118176
FBgn0013763	CG5210	0	0	0	NA	NA	NA	NA
FBgn0013764	Chi	2931.89	3095.28	2768.49	0.894423	-0.16097	0.352445	0.663839
FBgn0013765	cnn	4199.66	4213.95	4185.36	0.993215	-0.00982262	0.990982	1
FBgn0013767	Crz	2.25276	3.71038	0.795138	0.214301	-2.22229	0.534061	0.837289
FBgn0013770	Cp1	8577.04	7465.75	9688.33	1.2977	0.37596	0.020741	0.0877617
FBgn0013771	Cyp6a9	36.5502	7.21553	65.885	9.13099	3.19077	0.000221365	0.00201342
FBgn0013772	Cyp6a8	3.06153	5.01127	1.11178	0.221856	-2.1723	0.500289	0.807671
FBgn0013773	Cyp6a22	17.6555	3.51542	31.7956	9.04461	3.17706	0.00522851	0.0296541
FBgn0013799	Deaf1	2276.31	2527.39	2025.24	0.80132	-0.31955	0.0567898	0.189073
FBgn0013809	Dhc16F	13.6521	15.0063	12.2978	0.81951	-0.287166	0.799199	1
FBgn0013810	Dhc36C	8.69036	10.6569	6.72383	0.630938	-0.664431	0.607919	0.893656
FBgn0013811	Dhc62B	182.948	217.137	148.76	0.685098	-0.545619	0.0753701	0.234287
FBgn0013812	Dhc93AB	108.974	175.471	42.4771	0.242075	-2.04647	1.51798e-07	2.60195e-06
FBgn0013813	Dhc98D	5.34233	7.14616	3.53849	0.49516	-1.01403	0.53612	0.838456
FBgn0013948	Eip93F	41.2112	53.3295	29.0929	0.545531	-0.874266	0.343537	0.654327
FBgn0013949	Ela	7.29524	6.38831	8.20217	1.28393	0.36057	0.847951	1
FBgn0013953	Esp	27.9286	38.4957	17.3615	0.450997	-1.14881	0.0904732	0.26803
FBgn0013954	FK506-bp2	13896.4	14191.3	13601.6	0.95845	-0.0612255	0.685038	0.951934
FBgn0013955	PR2	9799.97	10644.2	8955.75	0.841375	-0.249178	0.123533	0.334127
FBgn0013972	Gycalpha99B	2.13902	2.37112	1.90692	0.804227	-0.314326	1	1
FBgn0013973	Gycbeta100B	2.93352	5.23375	0.633285	0.121	-3.04692	0.352088	0.663427
FBgn0013981	His4r	25809.3	29816.3	21802.3	0.73122	-0.451622	0.0034088	0.0206972
FBgn0013983	imd	464.496	356.84	572.152	1.60339	0.681122	0.0453967	0.160588
FBgn0013984	InR	7590.58	6806.02	8375.13	1.23055	0.2993	0.291501	0.594215
FBgn0013987	MAPk-Ak2	6759.87	6305.27	7214.46	1.1442	0.194333	0.230653	0.510068
FBgn0013988	Strn-Mlck	2039.48	807.232	3271.73	4.05303	2.019	2.49864e-17	1.36684e-15
FBgn0013995	Calx	18.2717	26.3128	10.2306	0.388807	-1.36287	0.130488	0.348161
FBgn0013997	Nrx-IV	23336.3	21391.9	25280.8	1.18179	0.240979	0.117619	0.3238
FBgn0013998	Nsf2	3196.17	2874.11	3518.22	1.22411	0.291728	0.0806953	0.246814
FBgn0014000	Hf	3.35858	3.81196	2.90521	0.76213	-0.391891	0.841076	1
FBgn0014001	Pak	4271.99	4425.53	4118.45	0.930612	-0.103749	0.501256	0.808373
FBgn0014002	Pdi	44511.1	48359.7	40662.4	0.840833	-0.250109	0.112089	0.314096
FBgn0014006	Pk92B	4382.68	4922.49	3842.88	0.780679	-0.357199	0.02727	0.109051
FBgn0014007	Ptp69D	4649.55	4974.17	4324.93	0.869478	-0.201778	0.207026	0.47634
FBgn0014009	Rab2	3616.57	2852.27	4380.87	1.53593	0.619109	0.000227275	0.0020541
FBgn0014010	Rab5	8239.16	7688.08	8790.24	1.14336	0.19328	0.231781	0.511869
FBgn0014011	Rac2	0	0	0	NA	NA	NA	NA
FBgn0014018	Rel	0	0	0	NA	NA	NA	NA
FBgn0014019	Rh5	15.2833	15.6825	14.8841	0.949089	-0.0753842	0.947079	1
FBgn0014020	Rho1	29092.7	22217.1	35968.3	1.61895	0.695055	1.54916e-05	0.00018488
FBgn0014022	Rlb1	583.481	538.402	628.56	1.16745	0.223366	0.241747	0.526154
FBgn0014023	Rlc1	1119.9	1086.02	1153.77	1.06238	0.087302	0.586101	0.877081
FBgn0014024	Rnp4F	3378.82	4025.62	2732.01	0.678656	-0.559248	0.000713229	0.00554718
FBgn0014026	RpL7A	88466	83641.2	93290.8	1.11537	0.157521	0.290988	0.593553
FBgn0014028	SdhB	2914.83	2566.43	3263.23	1.27151	0.346538	0.0307869	0.119704
FBgn0014029	Sep2	6654.15	5025.68	8282.62	1.64806	0.720768	1.15084e-05	0.000141937
FBgn0014031	Spat	30.7294	32.2684	29.1904	0.904611	-0.144631	0.811876	1
FBgn0014032	Sptr	944.089	951.951	936.227	0.983482	-0.0240296	0.897278	1
FBgn0014033	Sr-CI	241.329	162.585	320.074	1.96865	0.977208	0.0865745	0.260669
FBgn0014037	Su(Tpl)	0	0	0	NA	NA	NA	NA
FBgn0014073	Tie	1308.45	1209.37	1407.52	1.16385	0.218901	0.430576	0.746779
FBgn0014075	Ugt	8640.91	8753.38	8528.43	0.974302	-0.0375594	0.855768	1
FBgn0014076	Vm32E	0	0	0	NA	NA	NA	NA
FBgn0014092	CG4278	1258.38	1251.16	1265.61	1.01155	0.0165628	0.864967	1
FBgn0014127	barr	4298.91	4952.34	3645.47	0.736109	-0.442008	0.0095058	0.0473963
FBgn0014133	bif	10711.4	12861.2	8561.67	0.665698	-0.587061	0.000226023	0.0020456
FBgn0014135	bnl	1963.86	335.305	3592.42	10.7139	3.42141	8.79848e-07	1.34663e-05
FBgn0014141	cher	52121.7	20569.1	83674.4	4.06797	2.02431	1.66673e-05	0.000196249
FBgn0014143	croc	0.254675	0.509351	0	0	#NAME?	0.527075	0.831583
FBgn0014163	fax	86303.8	92153.2	80454.4	0.873051	-0.195863	0.196741	0.461498
FBgn0014179	gcm	11.0676	15.4257	6.70947	0.434953	-1.20107	0.0980381	0.284268
FBgn0014184	Oda	25647.4	26230	25064.8	0.955577	-0.0655557	0.767867	1
FBgn0014189	Hel25E	16631.3	18278.4	14984.1	0.819772	-0.286706	0.0884401	0.264418
FBgn0014269	prod	2152.88	2250.08	2055.68	0.913605	-0.130358	0.416567	0.732078
FBgn0014340	mof	1652.15	1676.94	1627.36	0.970432	-0.0433003	0.860335	1
FBgn0014342	mia	586.322	685.926	486.717	0.709578	-0.494968	0.0170649	0.0761825
FBgn0014343	mirr	4349.36	6991.96	1706.77	0.244105	-2.03443	2.04037e-32	3.88792e-30
FBgn0014366	noi	3096.89	3468.57	2725.22	0.78569	-0.347968	0.0410073	0.149043
FBgn0014368	nol	0	0	0	NA	NA	NA	NA
FBgn0014380	RhoL	1291.12	868.347	1713.9	1.97375	0.980941	5.57487e-06	7.3515e-05
FBgn0014388	sty	6845.9	6486.86	7204.94	1.1107	0.151465	0.461342	0.771805
FBgn0014391	sun	3266.16	3380.8	3151.51	0.932179	-0.101321	0.553506	0.8515
FBgn0014395	tilB	80.4731	104.999	55.9473	0.532837	-0.908235	0.226441	0.503972
FBgn0014396	tim	14.3647	5.33123	23.3981	4.38888	2.13385	0.0528687	0.179361
FBgn0014411	Vps26	3209	3227.14	3190.85	0.988755	-0.0163143	0.893442	1
FBgn0014417	CG13397	243.77	308.091	179.449	0.582456	-0.77978	0.00353103	0.0213373
FBgn0014427	CG11899	3052.18	5272.06	832.294	0.157869	-2.6632	6.12138e-28	7.77619e-26
FBgn0014454	Acp1	0	0	0	NA	NA	NA	NA
FBgn0014455	Ahcy13	3766.05	3659.7	3872.39	1.05812	0.0815016	0.593457	0.884328
FBgn0014464	Cp7Fa	0	0	0	NA	NA	NA	NA
FBgn0014465	Cp7Fb	0	0	0	NA	NA	NA	NA
FBgn0014466	Cp7Fc	0	0	0	NA	NA	NA	NA
FBgn0014467	CrebB-17A	4209.53	3212.09	5206.97	1.62105	0.696932	2.84977e-05	0.000318801
FBgn0014469	Cyp4e2	558.541	959.826	157.256	0.163838	-2.60966	1.18553e-10	3.17428e-09
FBgn0014848	Eig71Eh	0	0	0	NA	NA	NA	NA
FBgn0014849	Eig71Ei	0	0	0	NA	NA	NA	NA
FBgn0014850	Eig71Ej	0	0	0	NA	NA	NA	NA
FBgn0014851	Eig71Ek	0	0	0	NA	NA	NA	NA
FBgn0014857	His3.3A	7487.32	8092.99	6881.65	0.850322	-0.233919	0.159847	0.40063
FBgn0014859	Hr38	37.7812	35.8167	39.7456	1.10969	0.150163	0.720669	0.976813
FBgn0014861	Mcm2	5495.95	6064.61	4927.3	0.812468	-0.299618	0.0802701	0.245842
FBgn0014863	Mlp84B	0	0	0	NA	NA	NA	NA
FBgn0014865	Mtk	4.11451	0.56497	7.66405	13.5654	3.76186	0.432097	0.747742
FBgn0014868	Ost48	7994.09	9017.58	6970.61	0.773002	-0.371455	0.0197145	0.0845445
FBgn0014869	Pglym78	2249.55	2207.43	2291.68	1.03817	0.0540398	0.769911	1
FBgn0014870	Psi	11559.6	13718.9	9400.31	0.685208	-0.545387	0.00149698	0.0103167
FBgn0014877	Roe1	1146.99	936.047	1357.93	1.45071	0.536759	0.00326987	0.0200024
FBgn0014879	Set	11523.7	12804.8	10242.7	0.79991	-0.32209	0.0477415	0.166228
FBgn0014903	CG14630	0	0	0	NA	NA	NA	NA
FBgn0014906	Hydr2	2848.96	2306.55	3391.36	1.47032	0.55613	0.00572627	0.0321081
FBgn0014930	CG2846	763.596	696.306	830.886	1.19328	0.254928	0.186282	0.444257
FBgn0014931	CG2678	35.696	34.3533	37.0388	1.07817	0.10859	0.878123	1
FBgn0014949	btn	16.787	20.923	12.651	0.604643	-0.725844	0.512121	0.818487
FBgn0015000	betaggt-I	1395.36	997.692	1793.04	1.79718	0.845738	3.06462e-06	4.25217e-05
FBgn0015001	iotaTry	14.9926	21.4543	8.53079	0.397626	-1.33052	0.189834	0.450564
FBgn0015008	Actn3	0.127338	0.254675	0	0	#NAME?	0.998366	1
FBgn0015010	Ag5r	44.7136	73.041	16.3863	0.224344	-2.15622	0.00305195	0.0188001
FBgn0015011	Ahcy89E	42.6323	71.0218	14.2428	0.200541	-2.31803	0.0029694	0.0184006
FBgn0015014	tgo	3120.09	3773.92	2466.26	0.653499	-0.613742	0.000311602	0.00270504
FBgn0015019	Cctgamma	17681.9	17031.7	18332.2	1.07636	0.106156	0.474415	0.783021
FBgn0015024	CkIalpha	15678.4	17152.6	14204.2	0.828108	-0.27211	0.0845836	0.255967
FBgn0015025	CkIIalpha-i1	220.149	196.089	244.209	1.2454	0.316609	0.188717	0.448658
FBgn0015031	cype	2341.9	2266.47	2417.32	1.06656	0.092965	0.589728	0.880894
FBgn0015032	Cyp4c3	0.174183	0	0.348366	Inf	Inf	1	1
FBgn0015033	Cyp4d8	7.67324	8.70441	6.64206	0.763068	-0.390116	0.791344	1
FBgn0015034	Cyp4e1	17.3488	28.1523	6.54534	0.232497	-2.10471	0.000670067	0.00527609
FBgn0015035	Cyp4e3	2.57033	2.84887	2.29179	0.804456	-0.313914	0.936853	1
FBgn0015036	Cyp4ae1	274.721	283.677	265.766	0.936862	-0.0940914	0.625808	0.906795
FBgn0015037	Cyp4p1	0	0	0	NA	NA	NA	NA
FBgn0015038	Cyp9b1	6.24163	3.54293	8.94033	2.52343	1.33539	0.449603	0.763619
FBgn0015039	Cyp9b2	5.40839	9.14319	1.6736	0.183043	-2.44975	0.138252	0.361464
FBgn0015040	Cyp9c1	0	0	0	NA	NA	NA	NA
FBgn0015075	Ddx1	1951.14	2337.18	1565.11	0.66966	-0.5785	0.000690512	0.00541469
FBgn0015129	DopR2	4.57767	4.8781	4.27725	0.876826	-0.189637	1	1
FBgn0015218	eIF-4E	15395.8	15074	15717.5	1.04268	0.060303	0.69592	0.958839
FBgn0015221	Fer2LCH	6448.52	5187.58	7709.46	1.48614	0.571569	0.000467548	0.00387331
FBgn0015222	Fer1HCH	8735.45	6963.66	10507.2	1.50887	0.593466	0.000276877	0.00242756
FBgn0015229	glec	1699.95	1845.07	1554.82	0.842688	-0.24693	0.177271	0.428486
FBgn0015230	Glut3	0	0	0	NA	NA	NA	NA
FBgn0015239	Hr78	4658	5696.35	3619.64	0.635432	-0.654191	4.49077e-05	0.00048119
FBgn0015240	Hr96	596.84	595.421	598.259	1.00477	0.00685908	0.955696	1
FBgn0015245	Hsp60	19237.5	17181.8	21293.3	1.2393	0.309524	0.0624437	0.202358
FBgn0015247	Iap2	1915.75	1902.75	1928.74	1.01366	0.019573	0.958409	1
FBgn0015268	Nap1	26110.5	25363	26858.1	1.05895	0.0826308	0.566249	0.861357
FBgn0015269	Nf1	3773.68	3747.64	3799.72	1.0139	0.0199113	0.921777	1
FBgn0015270	Orc2	1109.74	1155.22	1064.26	0.921257	-0.118324	0.553891	0.851619
FBgn0015271	Orc5	747.893	817.755	678.031	0.829137	-0.270317	0.173623	0.422615
FBgn0015277	Pi3K59F	1004.31	873.895	1134.72	1.29846	0.376803	0.0432059	0.15483
FBgn0015278	Pi3K68D	4747.05	5151.37	4342.73	0.843026	-0.246351	0.133645	0.353859
FBgn0015279	Pi3K92E	5662.05	5191.91	6132.2	1.18111	0.24014	0.138834	0.36256
FBgn0015282	Pros26.4	8339.16	8452.66	8225.66	0.973144	-0.0392746	0.841364	1
FBgn0015283	Pros54	5282.88	5520.56	5045.19	0.913892	-0.129905	0.417609	0.732964
FBgn0015286	Rala	4224.17	3396.01	5052.33	1.48772	0.573107	0.000903541	0.0067917
FBgn0015288	RpL22	36383.5	34596	38171	1.10334	0.141871	0.567027	0.861734
FBgn0015295	shark	2335.18	2402.85	2267.5	0.943672	-0.0836433	0.605443	0.892175
FBgn0015296	Shc	2932.71	2119.14	3746.28	1.76783	0.821978	1.17325e-06	1.76264e-05
FBgn0015298	Srp19	1369.18	1395.93	1342.42	0.961667	-0.0563911	0.737125	0.984847
FBgn0015299	Ssb-c31a	2062.7	1941.79	2183.6	1.12453	0.169326	0.431458	0.747516
FBgn0015300	Ssl	0.174183	0	0.348366	Inf	Inf	1	1
FBgn0015316	Try29F	62.4692	82.9496	41.9889	0.506198	-0.982226	0.019997	0.0852763
FBgn0015320	UbcD2	5180.87	5313.7	5048.04	0.950004	-0.0739939	0.699161	0.961558
FBgn0015321	UbcD4	3083.49	3150.92	3016.07	0.957205	-0.0631007	0.652042	0.926521
FBgn0015323	VAChT	0	0	0	NA	NA	NA	NA
FBgn0015324	Vha26	8959.25	7132.25	10786.2	1.51232	0.596764	0.000185155	0.00171685
FBgn0015331	abs	1734.19	1818.48	1649.9	0.907294	-0.140358	0.383995	0.697655
FBgn0015336	CG15865	0	0	0	NA	NA	NA	NA
FBgn0015338	CG5861	1728.35	1497.81	1958.9	1.30784	0.387184	0.0222718	0.0926313
FBgn0015351	CG14906	0	0	0	NA	NA	NA	NA
FBgn0015359	CG2034	1178.9	1108.77	1249.04	1.12651	0.171858	0.347853	0.659098
FBgn0015360	oxt	705.965	656.21	755.719	1.15164	0.203691	0.317721	0.623831
FBgn0015371	chn	10717.3	8792.59	12642.1	1.43781	0.523876	0.00595698	0.0331095
FBgn0015372	chrw	653.444	524.369	782.52	1.49231	0.577545	0.00426427	0.0250531
FBgn0015374	crl	2230.93	2287.54	2174.32	0.950507	-0.0732302	0.639815	0.917652
FBgn0015376	cutlet	1425.24	1323.07	1527.4	1.15444	0.207188	0.199109	0.464196
FBgn0015379	dod	2038.3	2345.53	1731.07	0.738029	-0.43825	0.0112726	0.0541715
FBgn0015380	drl	13484.9	11657.7	15312.1	1.31348	0.393394	0.0269931	0.108247
FBgn0015381	dsf	0	0	0	NA	NA	NA	NA
FBgn0015391	glu	6709.85	7845.75	5573.95	0.710442	-0.493211	0.00223774	0.0146111
FBgn0015393	hoip	4974.41	5103.25	4845.57	0.949507	-0.07475	0.644467	0.92096
FBgn0015396	jumu	8147.07	9254.02	7040.12	0.760763	-0.39448	0.0134472	0.0627004
FBgn0015399	kek1	5158.04	7690.04	2626.03	0.341485	-1.5501	5.0974e-21	3.88524e-19
FBgn0015400	kek2	87.6669	59.8452	115.489	1.92979	0.948443	0.0376387	0.139851
FBgn0015402	ksr	0	0	0	NA	NA	NA	NA
FBgn0015477	Rme-8	7026.93	7067.23	6986.64	0.988596	-0.0165468	0.926037	1
FBgn0015509	lin19	9046.49	9830.88	8262.1	0.840424	-0.250811	0.118073	0.324746
FBgn0015513	mbc	7377.91	5814.58	8941.25	1.53773	0.620802	0.000160375	0.00150663
FBgn0015519	nAcRalpha-7E	540.473	554.373	526.572	0.949852	-0.074226	0.869254	1
FBgn0015520	nonA-l	895.301	1204.88	585.724	0.486127	-1.04059	1.28226e-06	1.90391e-05
FBgn0015521	RpS21	39134.2	37659.7	40608.6	1.0783	0.108763	0.577303	0.869949
FBgn0015522	olf186-M	0	0	0	NA	NA	NA	NA
FBgn0015524	otp	1.47523	0.310295	2.64016	8.50855	3.08891	0.258015	0.548612
FBgn0015527	pen	5298.35	5084.31	5512.38	1.08419	0.116623	0.436757	0.752817
FBgn0015541	sda	14367.5	8106.05	20628.9	2.54488	1.3476	2.60245e-06	3.65527e-05
FBgn0015542	sima	13316	13361.7	13270.3	0.993162	-0.00989906	0.907995	1
FBgn0015543	snoRNA:Me28S-A1322	0	0	0	NA	NA	NA	NA
FBgn0015544	spag	1160.14	1100.46	1219.82	1.10846	0.148557	0.38186	0.695766
FBgn0015546	spel1	2552.84	2974.93	2130.75	0.716236	-0.481493	0.00486753	0.0280073
FBgn0015550	tap	4.23627	7.01239	1.46015	0.208224	-2.26379	0.219967	0.49544
FBgn0015553	tos	0	0	0	NA	NA	NA	NA
FBgn0015558	tty	90.1118	141.318	38.9059	0.275309	-1.86088	2.09622e-06	3.01082e-05
FBgn0015561	unpg	45.1065	17.2683	72.9448	4.22421	2.07868	1.99571e-06	2.88092e-05
FBgn0015562	veg	589.413	295.398	883.427	2.99063	1.58045	5.58396e-11	1.56474e-09
FBgn0015565	yin	97.0623	112.252	81.8725	0.729362	-0.455292	0.2106	0.481462
FBgn0015568	alpha-Est1	6.96997	1.52396	12.416	8.14715	3.02629	0.066407	0.211662
FBgn0015569	alpha-Est10	137.46	115.678	159.242	1.3766	0.461105	0.127272	0.341813
FBgn0015570	alpha-Est2	11.9181	14.0254	9.81076	0.699501	-0.515602	0.631799	0.911411
FBgn0015571	alpha-Est3	448.346	331.155	565.538	1.70778	0.772119	0.000260148	0.00230207
FBgn0015572	alpha-Est4	42.766	34.1569	51.3751	1.50409	0.588892	0.252877	0.541615
FBgn0015574	alpha-Est6	1.56937	2.34361	0.795138	0.339279	-1.55946	0.804567	1
FBgn0015575	alpha-Est7	28.4604	9.46784	47.4529	5.01201	2.32539	0.0147741	0.0677546
FBgn0015576	alpha-Est8	22.3262	12.1692	32.4833	2.66931	1.41647	0.0667769	0.212426
FBgn0015577	alpha-Est9	205.406	23.0614	387.751	16.8139	4.07158	1.553e-05	0.000185145
FBgn0015582	dare	441.983	418.363	465.603	1.11292	0.154347	0.487521	0.795466
FBgn0015583	Acp29AB	0.310295	0.62059	0	0	#NAME?	0.932755	1
FBgn0015584	Acp53Ea	0.840387	0.62059	1.06018	1.70835	0.772603	0.924284	1
FBgn0015585	Acp63F	0	0	0	NA	NA	NA	NA
FBgn0015586	Acp76A	0.59278	1.18556	0	0	#NAME?	0.591922	0.883248
FBgn0015589	Apc	3755.03	3698.58	3811.48	1.03053	0.0433807	0.85144	1
FBgn0015591	Ast	55.5471	39.9058	71.1884	1.78391	0.835044	0.138042	0.361069
FBgn0015600	toc	5261.98	5475.81	5048.16	0.921903	-0.117313	0.581174	0.872677
FBgn0015602	BEAF-32	3466.78	3759.81	3173.75	0.844124	-0.244473	0.1347	0.355418
FBgn0015609	CadN	3297.26	3165.96	3428.56	1.08294	0.114958	0.742798	0.986787
FBgn0015614	CanB2	3304.79	3028.93	3580.66	1.18215	0.241419	0.142388	0.368977
FBgn0015615	Cap	4455.97	5115.8	3796.14	0.742042	-0.430426	0.00948847	0.0473512
FBgn0015618	Cdk8	811.789	880.653	742.925	0.843606	-0.245358	0.211089	0.482193
FBgn0015621	Clp	904.508	942.49	866.526	0.919401	-0.121234	0.543218	0.843493
FBgn0015622	Cnx99A	8215.63	7677.86	8753.4	1.14008	0.189139	0.267712	0.562637
FBgn0015623	Cpr	5240.09	4090.21	6389.98	1.56226	0.643637	0.000138463	0.00131482
FBgn0015625	CycB3	2987.43	3471.74	2503.12	0.720998	-0.471933	0.00542554	0.0306171
FBgn0015663	Dot	198.905	164.748	233.062	1.41466	0.500452	0.213254	0.485395
FBgn0015664	Dref	6245.35	6680.16	5810.54	0.86982	-0.201211	0.241114	0.525355
FBgn0015714	Cyp6a17	1800.39	449.964	3150.82	7.00239	2.80785	7.14871e-09	1.48873e-07
FBgn0015721	king-tubby	11.5623	14.8857	8.23881	0.553472	-0.853418	0.494427	0.801813
FBgn0015737	Hmu	9564.8	9499.18	9630.42	1.01382	0.0197956	0.943288	1
FBgn0015754	Lis-1	6636.84	6784.09	6489.59	0.956591	-0.0640259	0.696813	0.959377
FBgn0015756	RpL9	69922.4	61485.3	78359.5	1.27444	0.349866	0.0773602	0.238979
FBgn0015765	Mpk2	982.813	420.505	1545.12	3.67444	1.87753	1.14084e-10	3.06178e-09
FBgn0015766	Msr-110	25573.3	19986.9	31159.7	1.559	0.640625	0.00052481	0.00427057
FBgn0015770	MstProx	0.382013	0.764026	0	0	#NAME?	0.880901	1
FBgn0015772	Nak	2678.62	2529.11	2828.13	1.11823	0.161216	0.37933	0.694122
FBgn0015773	NetA	515.693	858.468	172.918	0.201427	-2.31167	8.9037e-10	2.10758e-08
FBgn0015774	NetB	3588.25	4346.61	2829.9	0.651058	-0.619143	0.029332	0.115321
FBgn0015776	nrv1	4856.17	3655.01	6057.33	1.65727	0.728805	1.09147e-05	0.000135198
FBgn0015777	nrv2	10016.8	8642.72	11391	1.31798	0.398331	0.0111333	0.0536709
FBgn0015778	rin	42240.6	43120.1	41361.1	0.959206	-0.0600868	0.726113	0.979224
FBgn0015781	P5cr	848.315	910.099	786.531	0.864225	-0.210521	0.242402	0.526978
FBgn0015789	Rab10	4227.22	2902.13	5552.31	1.91319	0.935978	1.77094e-08	3.46698e-07
FBgn0015790	Rab11	13045.2	11512.3	14578.2	1.26631	0.340636	0.0350854	0.133178
FBgn0015791	Rab14	1605.56	1340.66	1870.46	1.39518	0.480454	0.00751654	0.0395839
FBgn0015793	Rab-RP3	635.416	603.258	667.574	1.10661	0.146152	0.503545	0.811192
FBgn0015794	Rab-RP4	958.575	813.383	1103.77	1.35701	0.44043	0.0190306	0.0823529
FBgn0015795	Rab7	6298.5	5357.4	7239.6	1.35133	0.434378	0.00778257	0.0406478
FBgn0015797	Rab6	4159.99	3117.62	5202.36	1.6687	0.738722	1.06684e-05	0.000132822
FBgn0015799	Rbf	4710.26	5018.79	4401.74	0.877051	-0.189268	0.254761	0.543477
FBgn0015801	Reg-5	1820.62	1362.25	2278.98	1.67295	0.74239	0.00304172	0.0187674
FBgn0015803	rtGEF	2225.88	2214.83	2236.93	1.00998	0.014328	0.977154	1
FBgn0015805	Rpd3	13199.6	15190.6	11208.7	0.737875	-0.438551	0.00682661	0.0368327
FBgn0015806	S6k	7296.26	5358.01	9234.52	1.7235	0.785339	1.13752e-06	1.71121e-05
FBgn0015808	ScpX	1832.02	1969.02	1695.03	0.86085	-0.216166	0.197245	0.462394
FBgn0015816	Slh	2161.65	1887.29	2436.01	1.29074	0.368203	0.0315003	0.122165
FBgn0015818	Spx	2234.48	2501.76	1967.19	0.786324	-0.346804	0.0533887	0.180573
FBgn0015828	TfIIEalpha	1595.94	1370.62	1821.26	1.32878	0.410107	0.0181514	0.0797498
FBgn0015829	TfIIEbeta	843.997	844.772	843.223	0.998166	-0.00264772	0.979234	1
FBgn0015831	Rtnl2	5.24927	5.05314	5.44541	1.07763	0.107862	0.984077	1
FBgn0015834	Trip1	12778	12014.2	13541.9	1.12716	0.17269	0.284615	0.58578
FBgn0015838	Vang	7627.62	7730.32	7524.92	0.97343	-0.0388505	0.764722	0.99955
FBgn0015872	Drip	7810.37	1858.77	13762	7.4038	2.88827	1.73093e-41	5.82052e-39
FBgn0015903	apt	5705.29	1487.51	9923.07	6.67094	2.73789	6.51728e-21	4.90211e-19
FBgn0015904	ara	4506.38	5657.77	3354.98	0.592986	-0.75393	0.00119388	0.00861715
FBgn0015905	ast	1297.52	1327.47	1267.57	0.954874	-0.0666183	0.718931	0.975766
FBgn0015907	bl	13420.5	14763.5	12077.4	0.818062	-0.289718	0.06911	0.218511
FBgn0015919	caup	4274.07	5785.22	2762.93	0.477583	-1.06618	5.84235e-07	9.25146e-06
FBgn0015924	crq	1474.91	1029.71	1920.11	1.86472	0.898957	0.00109681	0.00802289
FBgn0015925	csul	2031.01	1926.62	2135.39	1.10836	0.148426	0.343392	0.654327
FBgn0015926	dah	1232.66	1338.91	1126.42	0.841293	-0.24932	0.189993	0.450801
FBgn0015929	dpa	7018.79	8076.06	5961.52	0.738172	-0.437971	0.0089074	0.0451211
FBgn0015946	grim	0.570156	0.875265	0.265046	0.302818	-1.72348	0.856925	1
FBgn0015949	hrg	10335.8	11023.3	9648.31	0.875269	-0.192201	0.20915	0.479602
FBgn0016013	Faa	49.7053	57.5516	41.8589	0.727328	-0.459322	0.266614	0.561258
FBgn0016031	lama	1285.3	908.975	1661.62	1.82801	0.870274	0.0550038	0.184904
FBgn0016032	lbm	192.177	66.809	317.544	4.75301	2.24884	7.103e-13	2.45343e-11
FBgn0016034	mael	109.716	92.1104	127.321	1.38227	0.46704	0.11055	0.311309
FBgn0016036	mei-P22	12.3886	16.0162	8.76088	0.547	-0.870387	0.425772	0.741824
FBgn0016038	mod(r)	1976.11	1878.33	2073.89	1.10411	0.142886	0.388878	0.703008
FBgn0016041	Tom40	4113.73	3872.97	4354.49	1.12433	0.169063	0.271808	0.568217
FBgn0016047	nompA	2.70752	2.72328	2.69176	0.988425	-0.0167972	1	1
FBgn0016053	pgc	39.0661	47.7618	30.3703	0.635869	-0.653199	0.574625	0.867744
FBgn0016054	phr6-4	564.202	477.143	651.262	1.36492	0.448817	0.0299429	0.1174
FBgn0016059	Sema-1b	12242.8	15079.5	9406.11	0.623767	-0.680921	1.48827e-05	0.000178386
FBgn0016061	side	475.714	390.16	561.268	1.43856	0.524621	0.152986	0.388859
FBgn0016070	smg	2064.42	2199.51	1929.33	0.877162	-0.189084	0.247101	0.532723
FBgn0016075	vkg	4031.12	3056.63	5005.6	1.63762	0.711601	0.0654604	0.209345
FBgn0016076	vri	4698.64	3503.7	5893.59	1.68211	0.750269	0.0181242	0.0796978
FBgn0016078	wun	4770.17	1562.9	7977.45	5.10425	2.3517	9.02867e-27	1.06417e-24
FBgn0016080	xmas-1	104.916	104.681	105.15	1.00448	0.00644684	0.98461	1
FBgn0016081	fry	7460.5	6635.56	8285.44	1.24864	0.32036	0.174309	0.423394
FBgn0016119	ATPsyn-Cf6	4107.38	4132.51	4082.25	0.98784	-0.0176513	0.914764	1
FBgn0016120	ATPsyn-d	5198.22	5409.52	4986.92	0.921878	-0.117353	0.50615	0.813917
FBgn0016122	Acer	83.3039	110.382	56.226	0.509377	-0.973193	0.0111256	0.0536709
FBgn0016123	Aph-4	27.8569	46.6467	9.06722	0.194381	-2.36304	0.269133	0.565002
FBgn0016126	CaMKI	6113.61	6023.15	6204.08	1.03004	0.0426984	0.82088	1
FBgn0016131	Cdk4	3018.64	3504.01	2533.26	0.722961	-0.468009	0.00557408	0.0313625
FBgn0016641	PTP-ER	1726.82	1727.52	1726.11	0.999182	-0.00117995	0.869566	1
FBgn0016650	Lgr1	1.21316	1.57958	0.846735	0.536049	-0.899564	0.90488	1
FBgn0016660	H15	11.807	18.5089	5.10507	0.275817	-1.85821	0.0582438	0.19268
FBgn0016672	Ipp	914.83	702.104	1127.56	1.60597	0.683441	0.00244409	0.0157162
FBgn0016675	Lectin-galC1	0	0	0	NA	NA	NA	NA
FBgn0016684	NaPi-T	162.541	105.273	219.809	2.08799	1.06212	0.000416678	0.00351059
FBgn0016685	Nlp	23025.3	26008	20042.6	0.770631	-0.375889	0.0174112	0.0774258
FBgn0016687	Nurf-38	9024.51	9878.17	8170.84	0.827161	-0.273759	0.0962767	0.280727
FBgn0016691	Oscp	5443.94	5426.82	5461.05	1.00631	0.00907243	0.879818	1
FBgn0016693	Past1	6063.76	4029.06	8098.46	2.01001	1.0072	5.83932e-09	1.23631e-07
FBgn0016694	Pdp1	2621.97	1660.42	3583.51	2.15819	1.10982	0.00358604	0.0216583
FBgn0016696	Pitslre	6670.65	7435.63	5905.67	0.794239	-0.332354	0.0381646	0.141438
FBgn0016697	Prosalpha5	5336.2	5553.73	5118.66	0.921661	-0.117691	0.480027	0.787704
FBgn0016698	Ptpa	993.359	1011.25	975.471	0.964623	-0.0519633	0.774207	1
FBgn0016700	Rab1	9742.01	8319.49	11164.5	1.34197	0.424353	0.0101763	0.0501704
FBgn0016701	Rab4	2150.92	2077.68	2224.16	1.0705	0.0982889	0.546552	0.846253
FBgn0016715	Reg-2	276.105	105.167	447.044	4.25081	2.08774	1.7263e-07	2.93702e-06
FBgn0016726	RpL29	37828.8	32141.5	43516	1.35389	0.437108	0.268801	0.564614
FBgn0016754	sba	2441.34	2368.56	2514.12	1.06145	0.0860431	0.61677	0.899388
FBgn0016756	Ubp64E	10613.3	11440.2	9786.4	0.855442	-0.225259	0.15067	0.384598
FBgn0016762	angel	0	0	0	NA	NA	NA	NA
FBgn0016792	dmt	2705.39	2931.61	2479.17	0.845669	-0.241834	0.14041	0.365174
FBgn0016794	dos	2543.1	2609.44	2476.75	0.949151	-0.0752912	0.630917	0.910767
FBgn0016797	fz2	32745.4	25781.5	39709.3	1.54022	0.623139	0.000119893	0.00116262
FBgn0016917	Stat92E	9467.24	10905.7	8028.78	0.7362	-0.44183	0.00680365	0.0367436
FBgn0016919	nompB	1.62637	2.93609	0.316642	0.107845	-3.21297	0.453409	0.766497
FBgn0016920	nompC	1.70054	1.07432	2.32675	2.16579	1.11489	0.80785	1
FBgn0016926	Pino	2759.41	2606.46	2912.35	1.11736	0.160091	0.358871	0.672462
FBgn0016930	smi35A	4660.36	6656.45	2664.27	0.400254	-1.32101	4.26093e-05	0.000460012
FBgn0016970	l(2)k10201	325.917	271.541	380.293	1.4005	0.485942	0.0357605	0.134801
FBgn0016974	swaPsi	7.38325	1.75053	13.016	7.43544	2.89442	0.119715	0.327437
FBgn0016975	stnB	0	0	0	NA	NA	NA	NA
FBgn0016976	stnA	0	0	0	NA	NA	NA	NA
FBgn0016977	spen	30622.7	38816.1	22429.3	0.577836	-0.791269	0.057046	0.189595
FBgn0016978	snRNP-U1-70K	3508.29	4007.59	3008.98	0.750821	-0.41346	0.012299	0.0582981
FBgn0016983	smid	10636.6	11944.6	9328.57	0.780984	-0.356634	0.029107	0.114673
FBgn0016984	sktl	0	0	0	NA	NA	NA	NA
FBgn0017397	how	8662.46	8383.08	8941.83	1.06665	0.0930901	0.650033	0.925067
FBgn0017414	cag	433.428	448.607	418.248	0.932327	-0.101092	0.678347	0.945913
FBgn0017418	ari-1	2816.34	2843.76	2788.92	0.980714	-0.0280963	0.846298	1
FBgn0017429	CG5989	742.508	642.345	842.67	1.31187	0.391619	0.0368888	0.137692
FBgn0017430	Nelf-E	776.564	864.174	688.955	0.79724	-0.326914	0.0965979	0.28152
FBgn0017448	CG2187	5.15418	5.8962	4.41216	0.748306	-0.4183	0.843128	1
FBgn0017456	Ubc84D	0.348366	0	0.696732	Inf	Inf	0.927655	1
FBgn0017457	U2af38	3315.43	3753.87	2876.99	0.766407	-0.383817	0.0187812	0.0814588
FBgn0017482	T3dh	35.8768	40.0589	31.6948	0.791205	-0.337877	0.652866	0.926676
FBgn0017545	RpS3A	108981	94572.5	123389	1.3047	0.38372	0.0257316	0.104175
FBgn0017549	Ric	790.437	535.595	1045.28	1.95163	0.964676	1.50138e-05	0.000179553
FBgn0017550	Rga	4728.43	5363.46	4093.39	0.7632	-0.389867	0.018675	0.0812139
FBgn0017551	Rca1	1221.61	1245.07	1198.16	0.962328	-0.055399	0.727607	0.979849
FBgn0017556	Pros28.1B	0	0	0	NA	NA	NA	NA
FBgn0017557	Pros28.1A	0	0	0	NA	NA	NA	NA
FBgn0017558	Pdk	1356.18	1264.55	1447.81	1.14492	0.195248	0.302282	0.605689
FBgn0017561	Ork1	3.97449	2.00521	5.94378	2.96417	1.56763	0.506274	0.813982
FBgn0017566	ND75	4685.17	4250.47	5119.88	1.20455	0.268489	0.0871232	0.2617
FBgn0017567	ND23	1652.49	1405.7	1899.27	1.35113	0.434163	0.0128317	0.0603971
FBgn0017572	Mo25	5762.34	5540.18	5984.5	1.0802	0.111297	0.488542	0.796373
FBgn0017577	Mcm5	5934.42	6536.51	5332.34	0.815777	-0.293753	0.0869329	0.26121
FBgn0017578	Max	1640.88	1563.21	1718.55	1.09937	0.136679	0.420398	0.736088
FBgn0017579	RpL14	46677.1	42342.8	51011.4	1.20472	0.268702	0.117487	0.323567
FBgn0017581	Lk6	29794.3	29771.8	29816.9	1.00151	0.00218206	0.997444	1
FBgn0017590	klg	4.53232	4.85408	4.21056	0.867428	-0.205184	0.95611	1
FBgn0019624	CoVa	4912.34	4406.45	5418.23	1.22961	0.298204	0.0644453	0.206677
FBgn0019637	Atu	3910.62	4137.61	3683.63	0.890281	-0.167668	0.331038	0.640466
FBgn0019643	Dat	18.0281	19.1066	16.9496	0.887108	-0.172818	0.880604	1
FBgn0019644	ATPsyn-b	6640.87	6524.59	6757.15	1.03564	0.0505273	0.670136	0.939452
FBgn0019650	toy	1.07038	1.7924	0.348366	0.194358	-2.36321	0.303224	0.606713
FBgn0019660	roX2	985.271	561.862	1408.68	2.50716	1.32606	0.000211306	0.0019296
FBgn0019661	roX1	23499	17205.6	29792.3	1.73154	0.792059	0.0456947	0.161403
FBgn0019662	qm	1344.36	1286.59	1402.12	1.0898	0.124058	0.514328	0.820242
FBgn0019686	lok	2567.72	2812.4	2323.03	0.825993	-0.275798	0.104937	0.299038
FBgn0019809	gcm2	0.301521	0.254675	0.348366	1.36788	0.451944	1	1
FBgn0019828	dj	1.30931	2.00521	0.613412	0.30591	-1.70882	0.744504	0.987881
FBgn0019830	colt	2136.57	2381.1	1892.04	0.794607	-0.331686	0.046519	0.163496
FBgn0019886	Letm1	3531.69	3090.08	3973.3	1.28582	0.362693	0.0332243	0.127288
FBgn0019890	Smg5	7750.88	8482.92	7018.84	0.827409	-0.273328	0.0862427	0.260024
FBgn0019925	Surf4	5650.36	5766.74	5533.99	0.95964	-0.0594341	0.687481	0.953694
FBgn0019928	Ser8	0	0	0	NA	NA	NA	NA
FBgn0019929	Ser7	0	0	0	NA	NA	NA	NA
FBgn0019932	SamDC	978.594	1006.49	950.702	0.944575	-0.0822634	0.605047	0.892175
FBgn0019936	RpS20	43280.2	39561.4	46998.9	1.188	0.248533	0.185836	0.443377
FBgn0019938	RpI1	6209.33	6551.16	5867.49	0.895642	-0.159006	0.346091	0.657285
FBgn0019940	Rh6	0.576503	0.254675	0.898331	3.52736	1.81859	0.85073	1
FBgn0019947	Psn	4528.78	4367.03	4690.53	1.07408	0.103098	0.519662	0.824964
FBgn0019948	Phm	3002.36	2704.94	3299.78	1.21991	0.286773	0.0913401	0.269843
FBgn0019949	Cdk9	979.757	1045.89	913.624	0.873538	-0.195058	0.26633	0.560867
FBgn0019952	Orct	384.638	417.868	351.407	0.840952	-0.249904	0.222065	0.498389
FBgn0019957	ND42	3239.14	3127.01	3351.27	1.07172	0.0999241	0.522841	0.828158
FBgn0019960	CG6455	5906.8	5724.6	6089.01	1.06366	0.0890331	0.552769	0.851039
FBgn0019968	Khc-73	7831.35	7620.51	8042.18	1.05533	0.0776989	0.65288	0.926676
FBgn0019972	Ice	3338.12	3124.8	3551.43	1.13653	0.184635	0.260243	0.551454
FBgn0019982	Gs1l	492.924	484.228	501.619	1.03592	0.050906	0.780407	1
FBgn0019985	mGluRA	29.0701	25.6843	32.4559	1.26365	0.337593	0.597191	0.886689
FBgn0019990	Gcn2	2604.74	2994.77	2214.71	0.739528	-0.435324	0.0231016	0.0952815
FBgn0020018	Ppox	884.08	807.035	961.125	1.19093	0.252092	0.202528	0.469581
FBgn0020224	Cbl	2688.48	3035.9	2341.06	0.771124	-0.374964	0.0221611	0.0925376
FBgn0020235	ATPsyn-gamma	8570.7	8552.56	8588.84	1.00424	0.00610705	0.897733	1
FBgn0020236	ATPCL	7898.91	9041.28	6756.53	0.747298	-0.420243	0.0110124	0.053372
FBgn0020238	14-3-3epsilon	83625.2	84152.4	83098	0.98747	-0.0181913	0.950699	1
FBgn0020240	Mcr	26767.4	22750.9	30784	1.35309	0.436258	0.00911622	0.0457934
FBgn0020245	ttv	2405.1	2635.36	2174.83	0.825251	-0.277095	0.0904594	0.26803
FBgn0020248	stet	22.0623	28.1146	16.01	0.569456	-0.812343	0.384187	0.697762
FBgn0020249	stck	4385.49	2774.69	5996.28	2.16106	1.11174	3.0268e-11	8.82792e-10
FBgn0020251	sfl	2081.07	1934.74	2227.41	1.15127	0.203232	0.262367	0.554668
FBgn0020255	ran	36429.7	34073.6	38785.9	1.1383	0.186881	0.229737	0.509127
FBgn0020257	ppa	14486.5	14189.7	14783.2	1.04182	0.059111	0.744956	0.988061
FBgn0020258	ppk	66.4496	69.1134	63.7858	0.922915	-0.11573	0.794616	1
FBgn0020261	pcm	5150.93	5792.32	4509.53	0.778536	-0.361164	0.0306409	0.119277
FBgn0020269	mspo	89.542	157.219	21.865	0.139073	-2.84608	1.80127e-09	4.15794e-08
FBgn0020270	mre11	2338.53	2088.02	2589.04	1.23995	0.310283	0.04814	0.167341
FBgn0020272	mst	957.293	822.997	1091.59	1.32636	0.407472	0.0332443	0.127288
FBgn0020277	lush	3.15746	2.41299	3.90194	1.61706	0.693374	0.742249	0.986485
FBgn0020278	loco	3339.68	2796.3	3883.05	1.38864	0.473671	0.00613841	0.0339528
FBgn0020279	lig	37610.7	43048.3	32173	0.747368	-0.420109	0.00823553	0.0424895
FBgn0020280	laf	0.813809	0.930885	0.696732	0.748462	-0.417999	1	1
FBgn0020294	ko	9147.61	10486.6	7808.62	0.744628	-0.425409	0.0272576	0.10904
FBgn0020299	stumps	3188.56	2345.41	4031.71	1.71898	0.781552	0.000726673	0.00562794
FBgn0020300	gk	1014.39	606.879	1421.91	2.34298	1.22835	6.0976e-09	1.28861e-07
FBgn0020304	drongo	7650.87	5835.9	9465.83	1.622	0.697773	1.72904e-05	0.000203166
FBgn0020305	dbe	1749.02	1806.3	1691.73	0.936573	-0.0945361	0.584268	0.875685
FBgn0020306	dom	32849.1	40515.9	25182.4	0.621543	-0.686073	0.000699131	0.00547852
FBgn0020307	dve	3058.85	4904.39	1213.31	0.247392	-2.01513	7.53623e-10	1.79878e-08
FBgn0020309	crol	33773.8	40091.9	27455.7	0.68482	-0.546204	0.000553774	0.00445239
FBgn0020312	CG4050	3146.82	3153.69	3139.95	0.995643	-0.00629927	0.876055	1
FBgn0020368	Vha68-1	67.9643	55.9472	79.9815	1.42959	0.515599	0.223241	0.500076
FBgn0020369	Pros45	421.138	454.673	387.602	0.852486	-0.230253	0.699149	0.961558
FBgn0020370	TppII	8961.97	10270.6	7653.3	0.745164	-0.42437	0.00912772	0.045831
FBgn0020371	Tim17b2	0.313469	0.310295	0.316642	1.02046	0.0292142	1	1
FBgn0020372	TM4SF	8.50156	8.47725	8.52587	1.00574	0.00825164	1	1
FBgn0020376	Sr-CIII	11.5336	11.1188	11.9485	1.07462	0.103829	0.958883	1
FBgn0020377	Sr-CII	1.06018	0	2.12037	Inf	Inf	0.516329	0.822171
FBgn0020378	Sp1	145.497	140.714	150.279	1.06797	0.0948773	0.727943	0.979849
FBgn0020379	Rfx	495.596	580.198	410.995	0.70837	-0.497425	0.0169842	0.0758815
FBgn0020381	Dredd	1957.82	2108.15	1807.49	0.857381	-0.221991	0.275556	0.574163
FBgn0020385	pug	1478	2022.56	933.437	0.461513	-1.11556	8.89805e-09	1.81663e-07
FBgn0020386	Pdk1	5295.49	5665.34	4925.63	0.869433	-0.201854	0.479959	0.787704
FBgn0020388	Pcaf	2236.71	2132.83	2340.59	1.09741	0.134103	0.411996	0.727692
FBgn0020389	Papss	1153.6	1141.31	1165.88	1.02153	0.0307271	0.964099	1
FBgn0020391	Nrk	97.1053	99.3916	94.8189	0.953993	-0.0679501	0.869168	1
FBgn0020392	Nmt	4424.97	5096.06	3753.87	0.736622	-0.441004	0.00806657	0.0418634
FBgn0020399	Mst89B	5.17546	6.13712	4.2138	0.686608	-0.542441	0.741053	0.986202
FBgn0020407	asun	801.008	813.399	788.617	0.969532	-0.0446393	0.826278	1
FBgn0020412	JIL-1	4865.31	5372.93	4357.7	0.811047	-0.302142	0.0632945	0.204362
FBgn0020414	Idgf3	211.47	28.0186	394.921	14.095	3.81711	3.50072e-08	6.52915e-07
FBgn0020415	Idgf2	356.211	37.7861	674.637	17.8541	4.15818	5.57269e-40	1.63366e-37
FBgn0020416	Idgf1	0	0	0	NA	NA	NA	NA
FBgn0020429	GluRIIB	1.70769	1.44024	1.97515	1.37141	0.455659	0.994638	1
FBgn0020439	fau	218.019	211.649	224.389	1.06019	0.0843285	0.912311	1
FBgn0020440	Fak56D	2384.01	2395.28	2372.74	0.990591	-0.013639	0.861656	1
FBgn0020443	Elf	13492.3	14709.4	12275.2	0.834514	-0.260993	0.105126	0.299427
FBgn0020445	E23	494.401	457.287	531.515	1.16232	0.217009	0.5511	0.850195
FBgn0020493	Dad	6651.54	6936.2	6366.88	0.91792	-0.123559	0.437557	0.753289
FBgn0020496	CtBP	36865.3	42908.5	30822	0.718318	-0.477306	0.00271356	0.017065
FBgn0020497	emb	16628.2	18504.1	14752.3	0.797247	-0.326902	0.04356	0.155509
FBgn0020503	CLIP-190	3443.77	3844.67	3042.86	0.791451	-0.337428	0.0467239	0.163813
[truncated: 13,495 more rows]
