# Supplementary material for: The transcriptional response to tumorigenic polarity loss in Drosophila
Source: eLife. 2015 Feb 26;4:e03189. doi: 10.7554/eLife.03189 (PMC4369581; doi:10.7554/eLife.03189)
Supplement: Supplementary file 2. — Transcriptome Analysis of dlg Tissue. Differential expression analysis of dlg versus white RNA-Seq data by DESeq. Each column contains the following information: Flybase ID- Flybase Gene Identifier; Gene Name- Name of each gene; baseMean_allconditions- Average normalized read count for that gene, across all samples, baseMean_white- Normalized read count for that gene in white tissue; baseMean_discslarge- Normalized read count for that gene in dlg tissue; foldChange- Change of the gene in dlg, relative to white tissue; foldChangelog2- Logarithm to base 2 of the fold change; pval- p-value for the statistical significance of the fold change; padj- p-value adjusted for multiple testing with the Benjamini-Hochberg procedure, which controls for false discovery rate (FDR). DOI: http://dx.doi.org/10.7554/eLife.03189.022 [file elife03189s002.xlsx]

## Sheet: Discslargevwhite
Flybase ID	Gene Name	baseMean_Allconditions	baseMean_white	baseMean_discslarge	foldChange (dlg/white)	log2FoldChange (dlg/white)	pval	padj
FBgn0000003	7SLRNA:CR32864	0	0	0	NA	NA	NA	NA
FBgn0000008	a	2498.13	2385.47	2667.12	1.11807	0.161009	0.558698	0.906825
FBgn0000014	abd-A	1.73941	0.704319	3.29205	4.67408	2.22468	0.0580216	0.234883
FBgn0000015	Abd-B	4.76115	3.72414	6.31667	1.69614	0.762257	0.719049	1
FBgn0000017	Abl	4185.27	4409.23	3849.34	0.873017	-0.195919	0.284194	0.640457
FBgn0000018	abo	466.37	417.205	540.116	1.2946	0.372512	0.0816954	0.292709
FBgn0000022	ac	0	0	0	NA	NA	NA	NA
FBgn0000024	Ace	8.01149	7.6892	8.49493	1.10479	0.143769	0.868879	1
FBgn0000028	acj6	26.2686	33.4115	15.5541	0.465532	-1.10305	0.175401	0.477727
FBgn0000032	Acph-1	1314.73	1327.74	1295.23	0.97551	-0.0357708	0.857742	1
FBgn0000036	nAcRalpha-96Aa	17.0724	18.2958	15.2374	0.832838	-0.263893	0.855931	1
FBgn0000037	mAcR-60C	2.66449	2.24613	3.29205	1.46566	0.551546	0.790383	1
FBgn0000038	nAcRbeta-64B	1.23806	1.42648	0.955419	0.669773	-0.578255	1	1
FBgn0000039	nAcRalpha-96Ab	0	0	0	NA	NA	NA	NA
FBgn0000042	Act5C	225932	236371	210274	0.889591	-0.168785	0.269703	0.623856
FBgn0000043	Act42A	0	0	0	NA	NA	NA	NA
FBgn0000044	Act57B	811.591	1016.4	504.381	0.496243	-1.01088	0.146597	0.42967
FBgn0000045	Act79B	3.92271	4.23758	3.45041	0.814242	-0.296471	0.874044	1
FBgn0000046	Act87E	444.62	502.189	358.267	0.713411	-0.487194	0.172162	0.472678
FBgn0000047	Act88F	17.6252	15.8213	20.3312	1.28506	0.361832	0.921054	1
FBgn0000052	ade2	4186.33	3951.76	4538.18	1.1484	0.19962	0.42846	0.800387
FBgn0000053	ade3	6194.55	6493.06	5746.79	0.885067	-0.176141	0.251314	0.599595
FBgn0000054	Adf1	4026.99	4356.54	3532.67	0.810887	-0.302427	0.146273	0.429133
FBgn0000055	Adh	0	0	0	NA	NA	NA	NA
FBgn0000056	Adhr	0	0	0	NA	NA	NA	NA
FBgn0000057	adp	981.061	900.578	1101.79	1.22342	0.290921	0.130651	0.398286
FBgn0000061	al	1667.54	2573.14	309.146	0.120144	-3.05717	6.17609e-13	4.72828e-11
FBgn0000063	ald	1037.51	1039.69	1034.23	0.994752	-0.00759164	0.984938	1
FBgn0000064	Ald	9739.64	10682.6	8325.16	0.779317	-0.359717	0.209412	0.537494
FBgn0000071	Ama	7714.52	8446.76	6616.16	0.783277	-0.352405	0.070225	0.266278
FBgn0000075	amd	903.018	1091.01	621.026	0.569219	-0.812943	0.00599912	0.0460219
FBgn0000077	amx	210.25	171.415	268.502	1.56638	0.647437	0.0101577	0.0685102
FBgn0000078	Amy-d	5.64349	0.310295	13.6433	43.9688	5.45841	0.00573369	0.0443484
FBgn0000079	Amy-p	16.6334	0.86151	40.2912	46.7681	5.54745	0.00014284	0.00213767
FBgn0000083	AnnIX	14562.5	12168.7	18153.3	1.4918	0.577056	0.00118851	0.01323
FBgn0000084	AnnX	428.793	436.342	417.469	0.956747	-0.0637899	0.905054	1
FBgn0000092	CG2650	9.91769	12.5295	5.99994	0.478864	-1.06231	0.577675	0.920582
FBgn0000094	Anp	0	0	0	NA	NA	NA	NA
FBgn0000097	aop	9330.63	8286.46	10896.9	1.31502	0.395088	0.0649523	0.252381
FBgn0000099	ap	16627.2	18907.2	13207.2	0.698526	-0.517614	0.00187642	0.0185277
FBgn0000100	RpLP0	89174.3	84094	96794.6	1.15103	0.202922	0.375072	0.746322
FBgn0000108	Appl	208.47	222.155	187.943	0.845998	-0.241273	0.343861	0.711386
FBgn0000109	Aprt	356.5	379.318	322.273	0.84961	-0.235127	0.406417	0.778921
FBgn0000114	aret	135.732	131.079	142.711	1.08874	0.12266	0.713834	1
FBgn0000115	Arf72A	1692.88	1637.26	1776.3	1.08492	0.117589	0.549108	0.899246
FBgn0000116	Argk	14874.2	21858.2	4398.28	0.201219	-2.31316	3.23014e-13	2.54831e-11
FBgn0000117	arm	42523.2	44461.6	39615.7	0.891008	-0.166489	0.222351	0.556941
FBgn0000119	arr	11312.1	14488.1	6548.06	0.451962	-1.14573	7.125e-10	3.39766e-08
FBgn0000120	Arr1	1.56083	1.18556	2.12373	1.79133	0.841033	0.796924	1
FBgn0000121	Arr2	0	0	0	NA	NA	NA	NA
FBgn0000137	ase	0	0	0	NA	NA	NA	NA
FBgn0000139	ash2	2682.27	2420.33	3075.18	1.27056	0.345469	0.0864697	0.303156
FBgn0000140	asp	6900.21	7359.38	6211.45	0.844017	-0.244656	0.128564	0.394346
FBgn0000146	aub	108.42	123.298	86.102	0.698322	-0.518035	0.39797	0.7713
FBgn0000147	aur	1536.27	1679.14	1321.97	0.787295	-0.345024	0.0950823	0.321918
FBgn0000150	awd	30121.1	32642.6	26338.8	0.806883	-0.309569	0.0826915	0.295338
FBgn0000152	Axs	688.114	702.328	666.792	0.949403	-0.0749074	0.885449	1
FBgn0000153	b	153.177	118.491	205.205	1.73182	0.792289	0.0114679	0.0747307
FBgn0000157	Dll	2414.79	3692.53	498.176	0.134915	-2.88988	2.14309e-15	2.21269e-13
FBgn0000158	bam	72.2617	98.2486	33.2813	0.338746	-1.56173	0.071663	0.270364
FBgn0000163	baz	5150.78	4879.9	5557.1	1.13877	0.18748	0.615442	0.947236
FBgn0000166	bcd	0	0	0	NA	NA	NA	NA
FBgn0000173	ben	11179.1	11153.6	11217.2	1.0057	0.00819652	0.94515	1
FBgn0000179	bi	0	0	0	NA	NA	NA	NA
FBgn0000180	bib	2626.06	3681.94	1042.24	0.283068	-1.82078	1.11323e-06	2.88007e-05
FBgn0000181	bic	48338.4	42308.4	57383.4	1.35631	0.439689	0.0323661	0.158714
FBgn0000182	BicC	0.364101	0.606835	0	0	#NAME?	1	1
FBgn0000183	BicD	3891.09	4208.17	3415.47	0.811628	-0.30111	0.121377	0.379123
FBgn0000206	boss	0.186177	0.310295	0	0	#NAME?	1	1
FBgn0000210	br	69353.8	93791.4	32697.4	0.348619	-1.52028	4.41722e-07	1.2459e-05
FBgn0000212	brm	15141.2	17485.1	11625.4	0.664877	-0.58884	0.000689223	0.00834932
FBgn0000216	Brd	452.214	404.933	523.137	1.29191	0.369505	0.099458	0.332235
FBgn0000221	brn	344.483	306.548	401.386	1.30937	0.388873	0.0942195	0.31996
FBgn0000227	Bsg25A	0	0	0	NA	NA	NA	NA
FBgn0000228	Bsg25D	1932.43	2022.85	1796.82	0.888261	-0.170944	0.446656	0.816548
FBgn0000229	bsk	2700.45	2665.67	2752.61	1.03262	0.0463039	0.80734	1
FBgn0000233	btd	13.7747	17.2946	8.49493	0.49119	-1.02565	0.0888334	0.30875
FBgn0000239	bur	5922.57	6150.17	5581.17	0.907482	-0.140059	0.45019	0.819268
FBgn0000241	bw	8.19479	11.9947	2.49499	0.208009	-2.26528	0.362801	0.734122
FBgn0000242	Bx	4132.49	5845.23	1563.38	0.267463	-1.90259	3.26464e-06	7.75111e-05
FBgn0000244	by	2741.79	1916.72	3979.4	2.07614	1.05391	0.00064936	0.00793475
FBgn0000246	c(3)G	460.864	506.143	392.945	0.776352	-0.365218	0.281712	0.637648
FBgn0000247	ca	2212.04	2310.72	2064.04	0.893246	-0.162871	0.398506	0.771592
FBgn0000250	cact	4803.53	4969.67	4554.31	0.916421	-0.125918	0.518408	0.87617
FBgn0000251	cad	3.55431	3.37607	3.82168	1.13199	0.178861	0.951587	1
FBgn0000253	Cam	42032.6	40760.8	43940.3	1.078	0.108362	0.755093	1
FBgn0000256	capu	4251.52	4997.85	3132.04	0.626678	-0.674205	0.000823102	0.00973863
FBgn0000257	car	1050.76	958.457	1189.22	1.24076	0.311224	0.125418	0.388832
FBgn0000258	CkIIalpha	8813.82	9021.77	8501.9	0.942376	-0.0856253	0.651882	0.967336
FBgn0000259	CkIIbeta	11259.3	12104.8	9990.96	0.825372	-0.276883	0.0734673	0.27452
FBgn0000261	Cat	7808.24	9255.75	5636.97	0.609024	-0.715429	0.000485632	0.00621058
FBgn0000273	Pka-C1	6211.99	6824.76	5292.84	0.775534	-0.366737	0.0592427	0.238199
FBgn0000274	Pka-C2	0.873955	0.819646	0.955419	1.16565	0.221132	1	1
FBgn0000276	CecA1	9.59604	0.310295	23.5246	75.8138	6.24439	0.0751455	0.27837
FBgn0000277	CecA2	11.1733	0.958995	26.4947	27.6276	4.78804	0.00283817	0.0257794
FBgn0000278	CecB	19.7048	0.310295	48.7965	157.259	7.29699	0.000216402	0.00308277
FBgn0000279	CecC	9.21772	1.66331	20.5493	12.3545	3.62696	0.0243577	0.12967
FBgn0000280	Cec-Psi1	0	0	0	NA	NA	NA	NA
FBgn0000281	Cec2	0	0	0	NA	NA	NA	NA
FBgn0000283	Cp190	11982.9	13132.9	10257.9	0.781084	-0.356451	0.0426955	0.191721
FBgn0000286	Cf2	1417.97	1377.92	1478.03	1.07265	0.10118	0.405941	0.778538
FBgn0000287	salr	9525.99	11091.7	7177.37	0.647092	-0.627958	0.00161372	0.01657
FBgn0000289	cg	14031.3	14837.8	12821.7	0.864124	-0.21069	0.199865	0.520306
FBgn0000299	Cg25C	3967.29	4233.92	3567.36	0.842567	-0.247137	0.607459	0.941761
FBgn0000303	Cha	30.2736	33.3641	25.6379	0.76843	-0.380014	0.671141	0.97761
FBgn0000307	chif	0	0	0	NA	NA	NA	NA
FBgn0000308	chic	51903	53285.8	49828.6	0.93512	-0.0967772	0.501801	0.863893
FBgn0000313	chp	348.223	410.015	255.536	0.623236	-0.68215	0.0936692	0.318957
FBgn0000316	cin	0	0	0	NA	NA	NA	NA
FBgn0000317	ck	5795.39	7040.63	3927.54	0.55784	-0.842077	0.00190777	0.018784
FBgn0000318	cl	2620.4	2757.45	2414.84	0.875751	-0.191407	0.419273	0.790369
FBgn0000319	Chc	30133.4	34258.6	23945.6	0.698966	-0.516706	0.00943482	0.0649813
FBgn0000320	eya	914.558	970.528	830.603	0.855826	-0.224611	0.700682	0.997024
FBgn0000326	clt	791.423	814.809	756.345	0.928248	-0.107418	0.617857	0.949139
FBgn0000330	cm	1164.72	1301.52	959.525	0.737236	-0.439801	0.0388093	0.179441
FBgn0000337	cn	6.67619	2.73763	12.584	4.59668	2.20059	0.0707775	0.267871
FBgn0000339	cni	1624.42	1461.74	1868.42	1.27821	0.35413	0.0734263	0.27452
FBgn0000346	comt	653.469	551.154	806.943	1.4641	0.550012	0.0119644	0.0770733
FBgn0000351	cort	292.566	384.292	154.978	0.403282	-1.31014	0.000527305	0.0066528
FBgn0000352	cos	4155.54	4605.58	3480.49	0.755712	-0.404092	0.0267356	0.138464
FBgn0000355	Cp15	7.27654	8.02202	6.1583	0.767674	-0.381433	0.749182	1
FBgn0000356	Cp16	0	0	0	NA	NA	NA	NA
FBgn0000357	Cp18	51.9152	63.5589	34.4496	0.542011	-0.883607	0.624157	0.953089
FBgn0000358	Cp19	0.754522	0.62059	0.955419	1.53953	0.622493	1	1
FBgn0000359	Cp36	0	0	0	NA	NA	NA	NA
FBgn0000360	Cp38	0	0	0	NA	NA	NA	NA
FBgn0000363	cpo	50.6072	60.7714	35.3609	0.581868	-0.781236	0.130284	0.39785
FBgn0000370	crc	47462.8	38476.1	60942.7	1.58391	0.663492	0.000291685	0.00397412
FBgn0000376	crm	1999.05	1836.8	2242.41	1.22082	0.287851	0.133733	0.40447
FBgn0000377	crn	2719.43	2727.09	2707.94	0.992979	-0.0101655	0.931824	1
FBgn0000382	csw	3577.81	4101.88	2791.71	0.680593	-0.555137	0.00187902	0.0185333
FBgn0000384	cta	1691.6	1666.81	1728.79	1.03718	0.0526704	0.665608	0.973204
FBgn0000392	cup	378.292	406.797	335.534	0.824819	-0.277851	0.260163	0.611758
FBgn0000394	cv	1888.61	1745.11	2103.87	1.20558	0.269722	0.122684	0.382038
FBgn0000395	cv-2	3218.22	3438.18	2888.29	0.840064	-0.251429	0.11327	0.363486
FBgn0000404	CycA	11632	12483.6	10354.6	0.829456	-0.269762	0.125579	0.389222
FBgn0000405	CycB	10267.8	10989.7	9184.92	0.835772	-0.258818	0.149988	0.436054
FBgn0000406	Cyt-b5-r	3.98813	0.310295	9.50488	30.6318	4.93696	0.0902886	0.311498
FBgn0000409	Cyt-c-p	3354.83	2542.85	4572.8	1.7983	0.846635	1.0457e-05	0.000220381
FBgn0000411	D	14.6044	5.68748	27.9798	4.91954	2.29852	0.0109088	0.0723352
FBgn0000412	D1	32327	35482.8	27593.4	0.777656	-0.362796	0.0355804	0.169456
FBgn0000413	da	4745.26	5048.28	4290.73	0.849939	-0.234569	0.228365	0.566336
FBgn0000414	Dab	4695.74	4854.25	4457.96	0.918362	-0.122865	0.314528	0.675693
FBgn0000416	Sap-r	13158.6	14099.2	11747.8	0.833227	-0.263219	0.126103	0.389986
FBgn0000422	Ddc	935.314	353.584	1807.91	5.11309	2.35419	0.00811655	0.0580275
FBgn0000426	SmF	0	0	0	NA	NA	NA	NA
FBgn0000427	dec-1	0	0	0	NA	NA	NA	NA
FBgn0000439	Dfd	2.08545	0.254675	4.83162	18.9717	4.24578	0.00506471	0.040713
FBgn0000442	Pkg21D	1.23166	0	3.07915	Inf	Inf	0.320565	0.682878
FBgn0000447	Dhod	3811.79	3498.28	4282.05	1.22405	0.291657	0.147895	0.432651
FBgn0000448	Hr46	468.07	776.79	4.98999	0.00642386	-7.28234	0.00299988	0.0269439
FBgn0000449	dib	23.9708	36.7303	4.83162	0.131543	-2.92639	0.0129799	0.0817435
FBgn0000451	ect	58.8194	85.2535	19.1681	0.224837	-2.15305	0.000438075	0.00568639
FBgn0000454	Dip-B	4481.38	4473.44	4493.29	1.00444	0.00638759	0.868248	1
FBgn0000455	Dip-C	1076.55	1027.63	1149.94	1.11903	0.162243	0.335616	0.700993
FBgn0000459	disco	144.583	212.867	42.1579	0.198048	-2.33607	2.36997e-14	2.15094e-12
FBgn0000463	Dl	10088	11454.3	8038.55	0.701794	-0.51088	0.00427859	0.0358535
FBgn0000464	Lar	5092.68	6190.55	3445.87	0.556635	-0.845197	0.000863087	0.0101284
FBgn0000473	Cyp6a2	0	0	0	NA	NA	NA	NA
FBgn0000477	DNaseII	4.92817	3.18728	7.53951	2.3655	1.24215	0.45353	0.822213
FBgn0000479	dnc	2022.92	2357.11	1521.64	0.64555	-0.631399	0.105139	0.345269
FBgn0000482	dor	1835.76	1897.76	1742.75	0.918316	-0.122937	0.533554	0.889904
FBgn0000489	Pka-C3	564.817	728.908	318.679	0.437201	-1.19363	0.0356795	0.16971
FBgn0000490	dpp	4145.43	3419.13	5234.87	1.53105	0.614522	0.00169395	0.017221
FBgn0000492	Dr	4226.21	4684.02	3539.49	0.755654	-0.404203	0.0339107	0.164072
FBgn0000497	ds	38663.7	44776.3	29494.8	0.658716	-0.602272	0.040265	0.183831
FBgn0000499	dsh	2902.88	3181.18	2485.42	0.781289	-0.356072	0.0603467	0.24066
FBgn0000500	Dsk	0	0	0	NA	NA	NA	NA
FBgn0000504	dsx	2243.68	3132.24	910.853	0.290799	-1.7819	5.31044e-06	0.000120249
FBgn0000520	dwg	1077.42	1065.27	1095.64	1.02851	0.0405596	0.655763	0.969757
FBgn0000524	dx	5291.36	6455.68	3544.87	0.549109	-0.864837	7.1886e-06	0.000158318
FBgn0000527	e	29.711	18.0864	47.1479	2.60681	1.38229	0.262788	0.615488
FBgn0000529	bsh	0.186177	0.310295	0	0	#NAME?	1	1
FBgn0000533	ea	629.571	51.8121	1496.21	28.8776	4.85188	3.77199e-45	3.5375e-42
FBgn0000535	eag	7.53988	6.93953	8.4404	1.21628	0.282474	0.939935	1
FBgn0000536	eas	2311.22	2544.07	1961.94	0.771179	-0.374862	0.0805826	0.290108
FBgn0000541	E(bx)	20941.4	23481.5	17131.2	0.729563	-0.454895	0.00588703	0.0452545
FBgn0000542	ec	20945.6	23309.1	17400.5	0.746512	-0.421762	0.0582082	0.2353
FBgn0000543	ecd	2223.4	2399.24	1959.63	0.816769	-0.292	0.150502	0.436983
FBgn0000546	EcR	10309.2	9304.53	11816.1	1.26993	0.344754	0.0795466	0.287666
FBgn0000547	ed	35591	41390.2	26892.1	0.649721	-0.622107	0.00157601	0.0162719
FBgn0000551	Edg78E	6.01144	7.18742	4.24747	0.590958	-0.758873	0.74494	1
FBgn0000552	Edg84A	0	0	0	NA	NA	NA	NA
FBgn0000556	Ef1alpha48D	592359	529007	687388	1.29939	0.377837	0.181405	0.487634
FBgn0000557	Ef1alpha100E	1126.9	1838.71	59.2023	0.0321978	-4.95689	9.12777e-09	3.41275e-07
FBgn0000559	Ef2b	205831	206667	204578	0.989891	-0.0146583	0.634459	0.959447
FBgn0000560	eg	141.526	131.608	156.403	1.1884	0.24902	0.674822	0.979993
FBgn0000562	egl	5804.79	5802.08	5808.86	1.00117	0.00168473	0.894278	1
FBgn0000564	Eh	0.41984	0.310295	0.584157	1.88259	0.912716	0.842827	1
FBgn0000565	Eip71CD	2633.51	2030.15	3538.56	1.74301	0.801577	0.0125676	0.0800275
FBgn0000566	Eip55E	2687.91	2810.96	2503.32	0.890557	-0.167221	0.397814	0.7713
FBgn0000567	Eip74EF	5099.53	5494.97	4506.37	0.820089	-0.286147	0.140827	0.418472
FBgn0000568	Eip75B	10869.9	12834.8	7922.55	0.61727	-0.696027	0.0631335	0.247908
FBgn0000575	emc	18219.2	16839	20289.4	1.2049	0.268919	0.0776517	0.283363
FBgn0000576	ems	1808	2024.98	1482.54	0.732127	-0.449834	0.028297	0.143642
FBgn0000577	en	2559.83	3208.06	1587.49	0.494845	-1.01495	0.000653529	0.00797702
FBgn0000578	ena	5377.64	5762.46	4800.42	0.833052	-0.263522	0.131611	0.400064
FBgn0000579	Eno	13688.7	15831.6	10474.2	0.661598	-0.595974	0.00255248	0.0237795
FBgn0000581	E(Pc)	12359.6	13658.7	10410.9	0.762219	-0.391722	0.0137866	0.0858627
FBgn0000588	esc	0	0	0	NA	NA	NA	NA
FBgn0000591	E(spl)	538.618	525.559	558.207	1.06212	0.0869482	0.574553	0.918732
FBgn0000592	Est-6	11.7633	14.4735	7.69788	0.531859	-0.910884	0.486649	0.851353
FBgn0000594	Est-P	86.608	95.641	73.0585	0.763883	-0.388577	0.623465	0.952548
FBgn0000606	eve	0	0	0	NA	NA	NA	NA
FBgn0000611	exd	13022.3	14049.4	11481.7	0.817233	-0.29118	0.0682143	0.261295
FBgn0000615	exu	126.044	158.292	77.672	0.490688	-1.02712	0.0106518	0.0708482
FBgn0000617	e(y)1	1222.64	1221.35	1224.57	1.00264	0.00379938	0.934655	1
FBgn0000618	e(y)2	1021.63	961.066	1112.49	1.15756	0.211082	0.343204	0.710698
FBgn0000625	eyg	1912.9	2121.54	1599.93	0.754138	-0.407099	0.518973	0.876693
FBgn0000629	E(z)	2392.17	2471.78	2272.77	0.919488	-0.121098	0.583945	0.92451
FBgn0000633	fas	44.0124	29.0048	66.5237	2.29354	1.19758	0.0889576	0.3088
FBgn0000635	Fas2	12278	12586.1	11815.7	0.938789	-0.0911266	0.374401	0.746075
FBgn0000636	Fas3	32585.3	39034.9	22910.7	0.586929	-0.768743	1.57556e-05	0.000313829
FBgn0000639	Fbp1	460.745	568.73	298.766	0.525322	-0.928726	0.950224	1
FBgn0000640	Fbp2	112.29	72.9427	171.311	2.34857	1.23178	0.479045	0.843424
FBgn0000644	Fcp3C	53.4352	61.4848	41.3609	0.672701	-0.571963	0.404393	0.777157
FBgn0000658	fj	14109.6	11502.7	18019.9	1.56658	0.647618	0.000483361	0.00620877
FBgn0000659	fkh	1.93378	3.22296	0	0	#NAME?	0.0621575	0.24536
FBgn0000662	fl(2)d	5607.29	5968.89	5064.89	0.848549	-0.236929	0.162942	0.457702
FBgn0000667	Actn	9261.86	10317.6	7678.31	0.744198	-0.426241	0.0122138	0.0783659
FBgn0000709	fliI	2439.81	2519.55	2320.21	0.920881	-0.118913	0.528917	0.885959
FBgn0000711	flw	3131.62	3417.12	2703.38	0.791128	-0.338017	0.049853	0.211939
FBgn0000715	Fmrf	2.58024	2.38956	2.86626	1.19949	0.262421	1	1
FBgn0000719	fog	633.958	838.236	327.54	0.39075	-1.35568	0.00011056	0.00171564
FBgn0000721	for	4123.33	5025.63	2769.88	0.55115	-0.859482	6.4498e-06	0.000142886
FBgn0000723	Fps85D	5302.28	6262.05	3862.63	0.616833	-0.697049	0.0250698	0.132334
FBgn0000808	gd	225.22	47.4875	491.818	10.3568	3.3725	1.89347e-08	6.67995e-07
FBgn0000810	fs(1)K10	1697.24	1741.22	1631.27	0.936853	-0.0941046	0.532612	0.889319
FBgn0000826	png	35.0447	48.8865	14.282	0.292146	-1.77524	0.0081637	0.0582589
FBgn0000927	fs(1)Ya	3.23767	4.61725	1.16831	0.253033	-1.9826	0.789396	1
FBgn0000928	fs(1)Yb	44.0545	34.4908	58.4	1.69321	0.759758	0.243444	0.589444
FBgn0000964	tj	0.186177	0.310295	0	0	#NAME?	1	1
FBgn0000996	dup	3526.98	3447.56	3646.11	1.05759	0.0807817	0.833223	1
FBgn0001075	ft	36829.4	31744.8	44456.2	1.40042	0.485862	0.51515	0.873775
FBgn0001077	ftz	0	0	0	NA	NA	NA	NA
FBgn0001078	ftz-f1	4161.93	1973.8	7444.14	3.77148	1.91513	2.75742e-09	1.15791e-07
FBgn0001079	fu	1213.44	1369.3	979.653	0.715441	-0.483095	0.0324403	0.159008
FBgn0001083	fw	2401.98	2757.39	1868.87	0.677769	-0.561134	0.00411346	0.0347023
FBgn0001084	fy	893.998	963.812	789.276	0.81891	-0.288223	0.235491	0.577767
FBgn0001085	fz	7928.72	9240.64	5960.83	0.645067	-0.63248	0.0011783	0.0131293
FBgn0001086	fzy	4535.91	4829.33	4095.77	0.848102	-0.237691	0.184855	0.493443
FBgn0001087	g	3891.96	4373.46	3169.72	0.724764	-0.464417	0.0122677	0.0786225
FBgn0001089	Gal	109.682	155.655	40.7222	0.261619	-1.93446	0.111615	0.359198
FBgn0001090	bnb	0	0	0	NA	NA	NA	NA
FBgn0001091	Gapdh1	6755.42	7426.72	5748.47	0.774025	-0.369547	0.0823872	0.294625
FBgn0001092	Gapdh2	17725.5	23021.9	9781.07	0.42486	-1.23494	9.14059e-10	4.30411e-08
FBgn0001098	Gdh	12840.5	10420.3	16470.7	1.58064	0.660507	0.0378946	0.17659
FBgn0001099	gdl	0	0	0	NA	NA	NA	NA
FBgn0001104	G-ialpha65A	9276.21	9971.71	8232.96	0.825631	-0.276431	0.119635	0.375421
FBgn0001105	Gbeta13F	8522.83	9112.94	7637.67	0.838113	-0.254784	0.090578	0.312019
FBgn0001108	Gl	3645.03	4000.64	3111.63	0.777783	-0.36256	0.0489572	0.209191
FBgn0001112	Gld	631.939	750.937	453.443	0.603836	-0.727771	0.0636551	0.249087
FBgn0001114	Glt	1307.66	1215.37	1446.08	1.18982	0.250744	0.616732	0.948375
FBgn0001120	gnu	9.58836	12.7959	4.77709	0.373331	-1.42147	0.36322	0.734422
FBgn0001122	G-oalpha47A	2427.04	2558.42	2229.98	0.871627	-0.198217	0.234163	0.576381
FBgn0001123	G-salpha60A	5514.51	5801.03	5084.73	0.876523	-0.190137	0.311652	0.672933
FBgn0001124	Got1	3865.11	4773.33	2502.77	0.524323	-0.931472	3.19902e-06	7.61136e-05
FBgn0001125	Got2	4421.7	4904.64	3697.29	0.753835	-0.407678	0.0574228	0.233214
FBgn0001128	Gpdh	832.643	762.606	937.698	1.2296	0.298185	0.184153	0.492388
FBgn0001133	grau	832.943	862.091	789.221	0.915474	-0.12741	0.641352	0.962895
FBgn0001134	Grd	10.5687	13.367	6.3712	0.476636	-1.06904	0.515551	0.87389
FBgn0001137	grk	587.092	678.138	450.522	0.664351	-0.589982	0.0110799	0.0730057
FBgn0001138	grn	5687.63	6489.41	4484.96	0.69112	-0.532993	0.00520928	0.0414899
FBgn0001139	gro	14070	14894	12834.1	0.861691	-0.214757	0.211955	0.54115
FBgn0001142	Gs1	0	0	0	NA	NA	NA	NA
FBgn0001145	Gs2	366.836	524.292	130.651	0.249195	-2.00465	1.12559e-05	0.000234147
FBgn0001147	gsb-n	2.48035	3.49697	0.955419	0.273213	-1.8719	0.303404	0.66327
FBgn0001148	gsb	4.70386	2.99171	7.27209	2.43075	1.2814	0.41353	0.784536
FBgn0001149	GstD1	32652.4	32821.3	32399	0.987133	-0.0186833	0.954766	1
FBgn0001150	gt	64.1767	70.1497	55.2171	0.787131	-0.345324	0.627214	0.95426
FBgn0001168	h	5084.5	3921.77	6828.6	1.7412	0.800085	0.000128862	0.00195447
FBgn0001169	H	5979.84	6825.68	4711.07	0.690197	-0.53492	0.00269647	0.0248128
FBgn0001170	H2.0	137.443	137.36	137.568	1.00151	0.00217829	0.87654	1
FBgn0001174	halo	1.03997	0.56497	1.75247	3.10188	1.63314	0.703485	0.99854
FBgn0001179	hay	0	0	0	NA	NA	NA	NA
FBgn0001180	hb	2.15548	2.56609	1.53958	0.59997	-0.737038	1	1
FBgn0001185	her	1344.41	1451.4	1183.92	0.815708	-0.293875	0.20814	0.535529
FBgn0001186	Hex-A	4585.89	4215.98	5140.76	1.21935	0.286116	0.26145	0.613758
FBgn0001187	Hex-C	0	0	0	NA	NA	NA	NA
FBgn0001189	hfw	2237.53	2349.44	2069.66	0.880919	-0.182918	0.45217	0.821201
FBgn0001197	His2Av	24186.7	23495.8	25222.9	1.07351	0.102332	0.541164	0.895627
FBgn0001202	hk	1563.61	1530.72	1612.96	1.05373	0.075499	0.626186	0.95367
FBgn0001206	Hmr	2024.69	1915.83	2187.98	1.14205	0.191626	0.430417	0.802173
FBgn0001208	Hn	117.311	178.033	26.2273	0.147317	-2.763	5.24575e-07	1.43989e-05
FBgn0001215	Hrb98DE	25942.6	29006.4	21346.8	0.735933	-0.442353	0.0111034	0.0731175
FBgn0001216	Hsc70-1	4.01058	2.86263	5.73251	2.00253	1.00183	0.778709	1
FBgn0001217	Hsc70-2	377.182	626.973	2.49499	0.00397943	-7.97322	6.22647e-18	8.44249e-16
FBgn0001218	Hsc70-3	36852.8	43602.8	26727.8	0.612984	-0.706079	0.00525151	0.0416788
FBgn0001219	Hsc70-4	234199	203541	280185	1.37655	0.46106	0.077405	0.282743
FBgn0001220	Hsc70-5	10093	9961.28	10290.6	1.03306	0.0469176	0.934011	1
FBgn0001222	Hsf	4851.5	4891.5	4791.51	0.979557	-0.0297985	0.757246	1
FBgn0001223	Hsp22	0	0	0	NA	NA	NA	NA
FBgn0001224	Hsp23	67453.8	85234.7	40782.4	0.478472	-1.06349	0.302622	0.662074
FBgn0001225	Hsp26	39722.8	35421.3	46174.9	1.30359	0.382491	0.87612	1
FBgn0001226	Hsp27	67664.7	93776.9	28496.5	0.303875	-1.71845	0.0101403	0.068458
FBgn0001227	Hsp67Ba	5526.64	8851.83	538.86	0.0608755	-4.03799	4.68839e-08	1.52055e-06
FBgn0001228	Hsp67Bb	0.677965	1.12994	0	0	#NAME?	0.815409	1
FBgn0001229	Hsp67Bc	53.6237	62.7925	39.8706	0.634958	-0.655266	0.838335	1
FBgn0001230	Hsp68	21328.1	16313.2	28850.4	1.76853	0.822549	0.677971	0.98222
FBgn0001233	Hsp83	137164	138932	134513	0.96819	-0.046638	0.758984	1
FBgn0001234	Hsromega	1181.78	1050.37	1378.91	1.31279	0.392636	0.598854	0.936693
FBgn0001235	hth	44703.8	46086	42630.4	0.925018	-0.112447	0.569476	0.91417
FBgn0001247	Ide	3115.7	3017.59	3262.86	1.08128	0.112743	0.572885	0.917246
FBgn0001248	Idh	16162.8	18275.1	12994.4	0.711044	-0.49199	0.00825743	0.0586304
FBgn0001250	if	4792.67	4764.65	4834.7	1.0147	0.0210557	0.826255	1
FBgn0001253	ImpE1	9442.88	15160.5	866.379	0.0571469	-4.12918	0.000809461	0.00959924
FBgn0001254	ImpE2	39006.4	64986.2	36.7915	0.000566143	-10.7865	4.33183e-18	6.0938e-16
FBgn0001255	ImpE3	0	0	0	NA	NA	NA	NA
FBgn0001256	ImpL1	37.573	56.0739	9.82161	0.175155	-2.5133	0.00240066	0.0226084
FBgn0001257	ImpL2	10648.4	2751.21	22494.2	8.1761	3.03141	2.14703e-11	1.27172e-09
FBgn0001258	ImpL3	1315.06	332.69	2788.62	8.38202	3.0673	9.94348e-07	2.60242e-05
FBgn0001259	in	1869.04	2023.19	1637.82	0.809525	-0.304853	0.185741	0.495105
FBgn0001263	inaD	52.7407	64.3999	35.2519	0.54739	-0.869359	0.28485	0.640926
FBgn0001269	inv	3537.58	4233.8	2493.25	0.588892	-0.763925	0.000130325	0.00197399
FBgn0001276	ix	472.332	470.399	475.231	1.01027	0.0147422	0.881144	1
FBgn0001280	janA	3212.81	3571.68	2674.52	0.748814	-0.417321	0.0353739	0.168829
FBgn0001281	janB	6.75316	7.78668	5.20288	0.668177	-0.581697	0.891456	1
FBgn0001285	Jon44E	2.95814	4.93023	0	0	#NAME?	0.66764	0.975191
FBgn0001291	Jra	3371.44	2868.3	4126.16	1.43854	0.524604	0.00280159	0.0254883
FBgn0001296	kar	345.599	427.763	222.353	0.519805	-0.943958	0.00165235	0.0168744
FBgn0001297	kay	18613.4	18577.3	18667.6	1.00486	0.00699724	0.98294	1
FBgn0001301	kel	5074.6	5856.38	3901.93	0.66627	-0.58582	0.000901957	0.0105406
FBgn0001308	Khc	8176.59	8768.76	7288.33	0.831169	-0.266786	0.10831	0.352392
FBgn0001311	kkv	12916.3	12492.4	13552.3	1.08484	0.117483	0.650428	0.966894
FBgn0001313	kl-2	0	0	0	NA	NA	NA	NA
FBgn0001314	kl-3	0	0	0	NA	NA	NA	NA
FBgn0001315	kl-5	0.467326	0	1.16831	Inf	Inf	0.689836	0.989601
FBgn0001316	klar	31746.1	33841.9	28602.5	0.845179	-0.242672	0.0952833	0.322502
FBgn0001319	kn	1091.97	1791.48	42.6876	0.023828	-5.3912	5.79061e-55	1.30335e-51
FBgn0001320	kni	1408.95	1240.75	1661.25	1.3389	0.421049	0.0464927	0.202959
FBgn0001321	knk	4006.75	4364.09	3470.73	0.795294	-0.330441	0.0596729	0.239244
FBgn0001323	knrl	1423.09	1351.86	1529.94	1.13173	0.178531	0.51345	0.872375
FBgn0001324	kto	8447.21	9282.09	7194.9	0.775138	-0.367475	0.0347876	0.167022
FBgn0001325	Kr	5.3217	2.42734	9.66325	3.981	1.99313	0.237292	0.580037
FBgn0001330	kz	1816.28	1867.02	1740.18	0.932061	-0.101504	0.597364	0.935662
FBgn0001332	L	4707.18	3759.22	6129.12	1.63042	0.705246	0.000280554	0.00384877
FBgn0001337	Exp6	4595.5	4985.24	4010.9	0.804556	-0.313735	0.0974664	0.327918
FBgn0001341	l(1)1Bi	3003.15	3152.68	2778.86	0.881429	-0.182084	0.194939	0.511385
FBgn0001404	egh	1836.83	1947.19	1671.3	0.858314	-0.220422	0.304774	0.665239
FBgn0001491	l(1)10Bb	1413.67	1503.66	1278.67	0.850369	-0.233839	0.276606	0.63156
FBgn0001565	Hlc	4019.98	3863.21	4255.14	1.10145	0.139404	0.504419	0.865884
FBgn0001612	l(1)dd4	2576.73	2643.6	2476.44	0.93677	-0.0942339	0.60298	0.93871
FBgn0001624	dlg1	7733.87	11483.4	2109.59	0.183708	-2.44451	5.91267e-33	3.16863e-30
FBgn0001941	ifc	2115.37	2027.77	2246.77	1.108	0.147959	0.375084	0.746322
FBgn0001942	eIF-4a	112247	96307.2	136157	1.41378	0.499553	0.0104651	0.0699776
FBgn0001961	Sop2	3731.33	3324.43	4341.68	1.30599	0.385146	0.0491457	0.20982
FBgn0001965	Sos	4821.34	5493.64	3812.9	0.694057	-0.526873	0.00283123	0.0257372
FBgn0001967	nimC3	10.357	14.6776	3.8762	0.26409	-1.9209	0.211623	0.540658
FBgn0001970	Pgant35A	14.3027	10.4584	20.069	1.91893	0.940303	0.340027	0.706939
FBgn0001974	l(2)35Bd	897.488	964.538	796.914	0.826213	-0.275414	0.251978	0.600312
FBgn0001977	l(2)35Bg	1860.66	1797.04	1956.1	1.08851	0.122355	0.470748	0.835746
FBgn0001978	stc	4304.28	4359.86	4220.92	0.968133	-0.0467236	0.699281	0.996797
FBgn0001981	esg	3869.54	3243.6	4808.44	1.48244	0.567971	0.03301	0.16089
FBgn0001983	wor	9.62861	9.88937	9.23746	0.934079	-0.0983837	0.997505	1
FBgn0001986	l(2)35Df	2900.98	3030.1	2707.29	0.893465	-0.162518	0.282259	0.638285
FBgn0001987	Gli	9966.1	10215.5	9592.03	0.93897	-0.0908493	0.413426	0.784536
FBgn0001989	l(2)35Di	1872.76	1777.2	2016.1	1.13442	0.181956	0.398334	0.771442
FBgn0001990	wek	898.779	823.453	1011.77	1.22869	0.297117	0.174781	0.476961
FBgn0001991	Ca-alpha1D	9.42472	9.0182	10.0345	1.1127	0.154059	0.891227	1
FBgn0001992	Cyp303a1	52.3287	63.9608	34.8806	0.545344	-0.874762	0.179301	0.484245
FBgn0001994	crp	12096.5	11636.2	12787.1	1.09891	0.136074	0.708294	1
FBgn0001995	mRpL4	1110.75	1015.67	1253.37	1.23404	0.303386	0.0948338	0.321367
FBgn0002021	l(2)37Bb	715.63	651.534	811.775	1.24594	0.317239	0.160959	0.45445
FBgn0002022	Catsup	4790.38	4951.38	4548.88	0.918711	-0.122317	0.470447	0.835608
FBgn0002023	Lim3	13.5509	0.819646	32.6478	39.8316	5.31584	0.000148243	0.00220045
FBgn0002031	l(2)37Cc	6809.5	6812.41	6805.14	0.998933	-0.00153971	0.994621	1
FBgn0002036	CG10561	163.292	159.664	168.736	1.05682	0.0797271	0.577771	0.920606
FBgn0002044	swm	4999.58	5619.58	4069.58	0.724179	-0.465583	0.00906787	0.0630212
FBgn0002069	Aats-asp	10150.7	9745.37	10758.7	1.10398	0.142713	0.488963	0.853541
FBgn0002121	l(2)gl	19408.8	16195.1	24229.4	1.4961	0.581206	0.00148369	0.0156136
FBgn0002174	l(2)tid	0	0	0	NA	NA	NA	NA
FBgn0002183	dre4	17892.7	17953.7	17801.1	0.991504	-0.01231	0.802358	1
FBgn0002283	l(3)73Ah	1196.64	1219.88	1161.79	0.952378	-0.0703936	0.873133	1
FBgn0002284	Pros26	5288.62	5258.62	5333.6	1.01426	0.0204252	0.986134	1
FBgn0002306	sas	18038.7	13291.2	25160	1.89299	0.920667	0.00137388	0.0147534
FBgn0002354	l(3)87Df	341.433	344.005	337.575	0.981308	-0.0272215	0.906816	1
FBgn0002413	dco	7224.37	7674.48	6549.19	0.853372	-0.228754	0.264662	0.618342
FBgn0002431	hyd	17482.3	19929.4	13811.6	0.693028	-0.529015	0.0241771	0.129074
FBgn0002440	l(3)mbn	2.94408	2.57018	3.50494	1.3637	0.447523	0.758572	1
FBgn0002441	l(3)mbt	2909.61	2796.71	3078.96	1.10092	0.138711	0.567341	0.91266
FBgn0002466	sti	13038.3	13589	12212.2	0.89869	-0.154105	0.207835	0.534991
FBgn0002521	pho	5978.58	5887.98	6114.48	1.03847	0.0544577	0.767615	1
FBgn0002522	lab	21.6952	21.6803	21.7176	1.00172	0.00248375	0.771084	1
FBgn0002524	lace	2538.63	2483.06	2621.99	1.05595	0.0785457	0.529112	0.885959
FBgn0002525	Lam	30336.1	32335.8	27336.4	0.845392	-0.242308	0.114567	0.36681
FBgn0002526	LanA	40112.9	41680.3	37761.7	0.905985	-0.142441	0.553472	0.903111
FBgn0002528	LanB2	11602.5	12704.6	9949.44	0.783138	-0.352661	0.041052	0.186516
FBgn0002531	Lcp1	32.6028	49.8431	6.74246	0.135274	-2.88605	0.0539842	0.224359
FBgn0002533	Lcp2	19.8063	31.8422	1.75247	0.0550361	-4.18348	0.00664193	0.0499654
FBgn0002534	Lcp3	14.1327	22.9176	0.955419	0.0416893	-4.58418	0.214232	0.544728
FBgn0002535	Lcp4	72.9444	116.053	8.28204	0.0713645	-3.80865	0.0549063	0.227008
FBgn0002542	lds	5378.93	5605.88	5038.51	0.89879	-0.153943	0.364943	0.736778
FBgn0002543	lea	17338.1	20555.7	12511.7	0.608674	-0.716259	0.00273617	0.0250552
FBgn0002552	lin	2012.21	2167.78	1778.87	0.820596	-0.285256	0.214482	0.544873
FBgn0002561	l(1)sc	0	0	0	NA	NA	NA	NA
FBgn0002562	Lsp1alpha	74.3094	33.1861	135.994	4.09793	2.03489	0.327431	0.692002
FBgn0002563	Lsp1beta	603.599	298.591	1061.11	3.55372	1.82933	0.310472	0.671673
FBgn0002564	Lsp1gamma	574.944	390.183	852.084	2.18381	1.12684	0.581535	0.923205
FBgn0002565	Lsp2	636.903	371.586	1034.88	2.78503	1.47769	0.317312	0.677743
FBgn0002566	lt	3750.36	3503.13	4121.2	1.17644	0.234422	0.191378	0.504252
FBgn0002567	ltd	232.19	323.027	95.934	0.296985	-1.75154	0.00268341	0.0247331
FBgn0002569	Mal-A2	1.26161	2.10269	0	0	#NAME?	0.821738	1
FBgn0002570	Mal-A1	1.64378	2.10269	0.955419	0.454379	-1.13803	0.947205	1
FBgn0002571	Mal-A3	0	0	0	NA	NA	NA	NA
FBgn0002573	sens	124.879	203.141	7.48498	0.0368462	-4.76234	5.0025e-10	2.42665e-08
FBgn0002576	lz	15.3836	2.45485	34.7768	14.1666	3.82442	7.19394e-09	2.81113e-07
FBgn0002577	m	51.5017	76.5987	13.8562	0.180893	-2.46679	0.0202209	0.111881
FBgn0002578	m1	26.672	39.7108	7.11372	0.179138	-2.48086	0.025826	0.135184
FBgn0002579	RpL36	65966.3	51673.3	87405.8	1.69151	0.758309	0.00273516	0.0250552
FBgn0002590	RpS5a	77077.3	69321.8	88710.5	1.27969	0.355795	0.0923984	0.315976
FBgn0002592	m2	1507.18	1887.7	936.413	0.496061	-1.01141	0.0159582	0.0952684
FBgn0002593	RpLP1	72533.5	65467.5	83132.6	1.26983	0.344635	0.33266	0.697649
FBgn0002607	RpL19	86657.7	74113.4	105474	1.42315	0.509083	0.073708	0.275036
FBgn0002609	HLHm3	3250.26	2660.44	4134.99	1.55425	0.636219	0.0728918	0.27335
FBgn0002622	RpS3	92207.9	77391.2	114433	1.47863	0.56426	0.0028546	0.0258858
FBgn0002626	RpL32	48229.1	41189.8	58788	1.42725	0.513235	0.0594172	0.238683
FBgn0002629	m4	668.782	653.817	691.228	1.05722	0.0802747	0.711252	1
FBgn0002631	HLHm5	18.2401	18.4002	17.9998	0.978239	-0.0317409	0.939486	1
FBgn0002632	m6	569.016	394.506	830.78	2.10587	1.07442	0.0843497	0.298769
FBgn0002633	HLHm7	1100.01	1318.6	772.133	0.585571	-0.772085	0.248631	0.595508
FBgn0002638	Bj1	8511.15	7855.2	9495.09	1.20877	0.273534	0.111294	0.358692
FBgn0002641	mal	1064.88	1060.05	1072.11	1.01137	0.0163131	0.792081	1
FBgn0002643	mam	8798.57	9783.4	7321.32	0.74834	-0.418234	0.0515971	0.217237
FBgn0002645	Map205	20699.6	18998.3	23251.4	1.22386	0.291443	0.621116	0.951554
FBgn0002652	squ	0	0	0	NA	NA	NA	NA
FBgn0002673	twe	297.076	277.02	327.159	1.18099	0.239999	0.310651	0.671673
FBgn0002707	mei-9	1389.03	1418.64	1344.61	0.947815	-0.0773219	0.746483	1
FBgn0002709	mei-218	80.7587	79.8757	82.0831	1.02763	0.0393271	0.881219	1
FBgn0002715	mei-S332	720.727	670.163	796.574	1.18863	0.249297	0.132051	0.400673
FBgn0002716	mei-W68	0	0	0	NA	NA	NA	NA
FBgn0002719	Men	1245.99	899.313	1766	1.96372	0.97359	0.000591281	0.00732286
FBgn0002723	Met	811.295	760.049	888.164	1.16856	0.224733	0.392217	0.76475
FBgn0002732	malpha	2976.06	3212.57	2621.29	0.815949	-0.29345	0.742928	1
FBgn0002733	HLHmbeta	3739	3281.84	4424.74	1.34825	0.431089	0.148308	0.433296
FBgn0002734	HLHmdelta	608.181	846.001	251.452	0.297224	-1.75038	3.80359e-07	1.08644e-05
FBgn0002735	HLHmgamma	227.268	186.45	288.495	1.54731	0.629759	0.0349018	0.167356
FBgn0002736	mago	3276.63	3404.19	3085.29	0.90632	-0.141908	0.408225	0.780255
FBgn0002772	Mlc1	100.528	122.637	67.3649	0.549301	-0.864331	0.495272	0.859888
FBgn0002773	Mlc2	1161.89	727.943	1812.82	2.49033	1.31634	0.011636	0.0756071
FBgn0002774	mle	4517.13	4958.56	3854.99	0.777441	-0.363194	0.0551995	0.227551
FBgn0002775	msl-3	1634.59	1486.73	1856.37	1.24862	0.320339	0.100231	0.334321
FBgn0002778	mnd	3625.56	2171.23	5807.06	2.67455	1.4193	1.82894e-05	0.000361104
FBgn0002780	mod	23676	24452.8	22510.8	0.920583	-0.11938	0.357933	0.728687
FBgn0002781	mod(mdg4)	22495.5	22576.2	22374.5	0.991068	-0.0129437	0.975907	1
FBgn0002783	mor	15436.9	17468.4	12389.6	0.70926	-0.495614	0.00265115	0.024516
FBgn0002787	Mov34	6319.54	7046.32	5229.38	0.742144	-0.430229	0.0166307	0.0981445
FBgn0002789	Mp20	117.042	121.844	109.84	0.901477	-0.149637	0.920524	1
FBgn0002791	mr	2136.08	2141.21	2128.37	0.994001	-0.00868056	0.942661	1
FBgn0002838	ms(3)K81	5.66853	4.70506	7.11372	1.51193	0.59639	0.825539	1
FBgn0002842	sa	0	0	0	NA	NA	NA	NA
FBgn0002855	Acp26Aa	0	0	0	NA	NA	NA	NA
FBgn0002856	Acp26Ab	0	0	0	NA	NA	NA	NA
FBgn0002862	Mst87F	2.08115	0	5.20288	Inf	Inf	0.093703	0.318976
FBgn0002863	Acp95EF	0	0	0	NA	NA	NA	NA
FBgn0002865	Mst98Ca	0.467326	0	1.16831	Inf	Inf	0.656784	0.969757
FBgn0002868	MtnA	74.643	80.5145	65.8357	0.817688	-0.290377	0.813748	1
FBgn0002869	MtnB	0.305611	0.509351	0	0	#NAME?	1	1
FBgn0002872	mu2	3159.33	2878.96	3579.88	1.24346	0.314364	0.136152	0.409367
FBgn0002873	mud	9494.95	10186.7	8457.25	0.830221	-0.268433	0.0757214	0.279766
FBgn0002878	mus101	2044.26	2186.05	1831.56	0.837837	-0.255258	0.148818	0.434336
FBgn0002887	mus201	0	0	0	NA	NA	NA	NA
FBgn0002891	mus205	1631.86	1602.37	1676.1	1.04601	0.0648996	0.604399	0.939879
FBgn0002899	mus301	987.171	979.74	998.318	1.01896	0.0271004	0.646918	0.964282
FBgn0002901	mus304	688.126	699.131	671.619	0.960647	-0.0579212	0.889663	1
FBgn0002905	mus308	1497.6	1669.87	1239.2	0.742093	-0.430327	0.0321809	0.157957
FBgn0002906	mus309	1223.01	1315.26	1084.65	0.824664	-0.278121	0.154263	0.443104
FBgn0002909	mus312	0	0	0	NA	NA	NA	NA
FBgn0002914	Myb	8773.86	9021.96	8401.72	0.931252	-0.102756	0.469146	0.835003
FBgn0002917	na	18.5308	25.6108	7.91077	0.308885	-1.69486	0.001492	0.0156633
FBgn0002921	Atpalpha	30057.8	33271.2	25237.7	0.758544	-0.398694	0.0160728	0.0956752
FBgn0002922	nau	18.9731	23.9751	11.4702	0.478424	-1.06364	0.508892	0.87019
FBgn0002924	ncd	6280.18	5634.54	7248.64	1.28646	0.363411	0.0637527	0.249296
FBgn0002926	ndl	4.71885	6.59086	1.91084	0.289923	-1.78626	0.542891	0.896186
FBgn0002930	nec	0	0	0	NA	NA	NA	NA
FBgn0002931	net	1156.23	1077.74	1273.96	1.18206	0.241305	0.451832	0.820978
FBgn0002932	neur	660.997	547.935	830.59	1.51585	0.60013	0.0205844	0.113502
FBgn0002933	ng1	0	0	0	NA	NA	NA	NA
FBgn0002936	ninaA	5.68196	8.30161	1.75247	0.2111	-2.244	0.648269	0.965412
FBgn0002937	ninaB	2.36989	2.14455	2.70789	1.26268	0.336491	0.848863	1
FBgn0002938	ninaC	90.9435	118.688	49.3262	0.415594	-1.26675	0.0239715	0.128159
FBgn0002939	ninaD	0.77964	0.662455	0.955419	1.44224	0.528312	0.982431	1
FBgn0002940	ninaE	6.00249	6.18248	5.73251	0.927219	-0.109017	0.969892	1
FBgn0002941	slou	4.12025	3.78793	4.61873	1.21933	0.286084	0.970749	1
FBgn0002945	nkd	15262.1	13548.5	17832.3	1.31618	0.396359	0.459463	0.827724
FBgn0002948	nod	1282.54	1337.66	1199.86	0.896984	-0.156846	0.43391	0.804743
FBgn0002962	nos	0.233663	0	0.584157	Inf	Inf	0.733365	1
FBgn0002968	Nrg	28785.7	24111	35797.6	1.4847	0.570172	0.125988	0.389846
FBgn0002973	numb	8720.38	8633.85	8850.17	1.02505	0.035701	0.950534	1
FBgn0002985	odd	688.115	429.886	1075.46	2.50173	1.32292	2.4321e-06	5.93092e-05
FBgn0002989	okr	823.145	704.332	1001.37	1.42172	0.507642	0.0244068	0.129808
FBgn0003002	opa	1079.02	942.638	1283.6	1.36171	0.445424	0.0446563	0.198093
FBgn0003008	or	829.437	772.43	914.947	1.1845	0.244283	0.228924	0.56722
FBgn0003009	ord	2.5889	0.704319	5.41578	7.68938	2.94287	0.157561	0.448531
FBgn0003011	ort	13.3772	6.68834	23.4104	3.50018	1.80743	0.170056	0.46907
FBgn0003015	osk	0.233663	0	0.584157	Inf	Inf	0.742873	1
FBgn0003016	osp	5030.38	3535.04	7273.4	2.05752	1.0409	0.0266302	0.138109
FBgn0003022	Ote	3431.87	3436.36	3425.14	0.996733	-0.00472036	0.892405	1
FBgn0003023	otu	11.493	8.74917	15.6087	1.78402	0.835129	0.48496	0.849586
FBgn0003028	ovo	12856.4	14979.4	9671.9	0.645679	-0.631111	0.0831549	0.296502
FBgn0003034	Acp70A	0	0	0	NA	NA	NA	NA
FBgn0003041	pbl	6565.13	6887.66	6081.33	0.882931	-0.179627	0.29811	0.656799
FBgn0003042	Pc	964.543	946.64	991.396	1.04728	0.0666458	0.704146	0.998978
FBgn0003044	Pcl	4619.54	5054.79	3966.65	0.784732	-0.349728	0.0488556	0.208978
FBgn0003046	Pcp	0	0	0	NA	NA	NA	NA
FBgn0003048	pcx	3949.84	4399.36	3275.57	0.744556	-0.425548	0.0517218	0.217599
FBgn0003053	peb	268.782	357.968	135.002	0.377136	-1.40684	3.38702e-08	1.12774e-06
FBgn0003057	CG10598	0	0	0	NA	NA	NA	NA
FBgn0003060	CG9757	0.593463	0.35216	0.955419	2.71303	1.4399	0.892612	1
FBgn0003062	Fib	11577.6	10809.1	12730.3	1.17773	0.236011	0.30918	0.670168
FBgn0003065	CG2150	7.64816	11.473	1.91084	0.16655	-2.58597	0.244616	0.591006
FBgn0003067	Pepck	6146.18	3399.93	10265.5	3.01934	1.59423	0.00133222	0.0144023
FBgn0003068	per	31.6186	36.1008	24.8954	0.689608	-0.536151	0.306146	0.666416
FBgn0003071	Pfk	4479.66	5790.62	2513.23	0.434017	-1.20418	2.15693e-06	5.37037e-05
FBgn0003074	Pgi	4092.7	4809.12	3018.07	0.627572	-0.672147	0.00103306	0.0117791
FBgn0003076	Pgm	853.044	951.887	704.778	0.740401	-0.433621	0.110723	0.357461
FBgn0003079	phl	1887.47	2218.47	1390.97	0.626997	-0.673468	0.00177781	0.0178161
FBgn0003082	phr	1740.57	1671.29	1844.5	1.10364	0.14227	0.577109	0.920071
FBgn0003086	Pig1	0	0	0	NA	NA	NA	NA
FBgn0003087	pim	1537.14	1402.8	1738.64	1.2394	0.309645	0.139563	0.416175
FBgn0003089	pip	439.665	717.38	23.0936	0.0321917	-4.95717	3.50627e-28	1.16058e-25
FBgn0003090	pk	3984.11	5658.98	1471.8	0.260082	-1.94296	2.83403e-09	1.18127e-07
FBgn0003091	Pkc53E	7.81747	12.3922	0.955419	0.0770986	-3.69715	0.241324	0.58669
FBgn0003093	Pkc98E	2522.9	2618.1	2380.1	0.909094	-0.137498	0.445151	0.815246
FBgn0003114	plu	0.372354	0.62059	0	0	#NAME?	1	1
FBgn0003116	pn	121.852	120.755	123.498	1.02272	0.0324155	0.730337	1
FBgn0003117	pnr	1407.25	1686.48	988.398	0.586071	-0.770853	0.238306	0.581565
FBgn0003118	pnt	2363.23	2208.21	2595.76	1.1755	0.23328	0.269286	0.623582
FBgn0003124	polo	16533.6	17010	15818.9	0.929972	-0.10474	0.460499	0.828455
FBgn0003129	Poxm	20.5405	4.50192	44.5984	9.90652	3.30838	9.5938e-06	0.000205264
FBgn0003130	Poxn	348.745	482.028	148.82	0.308737	-1.69555	1.23414e-08	4.48032e-07
FBgn0003132	Pp1-13C	0	0	0	NA	NA	NA	NA
FBgn0003134	Pp1alpha-96A	2763.5	2668.6	2905.86	1.08891	0.122884	0.472874	0.837276
FBgn0003137	Ppn	20828.2	27141.8	11357.9	0.418463	-1.25683	0.00129964	0.0141452
FBgn0003138	Ptp61F	8018.64	7241.6	9184.21	1.26826	0.342848	0.121754	0.379878
FBgn0003139	PpV	2213.05	2188.87	2249.31	1.02761	0.0392966	0.95514	1
FBgn0003140	PpY-55A	0	0	0	NA	NA	NA	NA
FBgn0003141	pr	1268.31	1369.32	1116.8	0.815583	-0.294097	0.187749	0.499156
FBgn0003145	prd	1.11706	1.86177	0	0	#NAME?	0.589748	0.930339
FBgn0003149	Prm	151.032	181.788	104.899	0.57704	-0.793257	0.55978	0.907184
FBgn0003159	ptr	426.803	467.013	366.489	0.784752	-0.349691	0.123122	0.383084
FBgn0003162	Pu	131.989	184.055	53.8904	0.292795	-1.77204	2.17039e-05	0.000424792
FBgn0003165	pum	14977.5	17530.5	11148	0.635917	-0.65309	0.0350354	0.16764
FBgn0003169	put	5313.89	5697.71	4738.16	0.83159	-0.266057	0.219468	0.552765
FBgn0003174	pwn	4384.24	3905.6	5102.19	1.30638	0.385571	0.0649367	0.252381
FBgn0003175	px	5033.48	5260.83	4692.46	0.891961	-0.164948	0.277497	0.632817
FBgn0003178	PyK	10791.8	10386.4	11399.8	1.09757	0.134319	0.398648	0.771592
FBgn0003187	qua	10.3015	16.7797	0.584157	0.0348134	-4.84421	0.00205544	0.0200103
FBgn0003189	r	10057.9	9890.3	10309.2	1.04236	0.0598486	0.871822	1
FBgn0003204	ras	6145.79	6626.39	5424.89	0.818679	-0.288631	0.119618	0.375421
FBgn0003205	Ras85D	8015.58	8426.55	7399.13	0.878074	-0.187586	0.304523	0.665069
FBgn0003206	Ras64B	2997.69	2320.52	4013.43	1.72954	0.790386	1.06949e-05	0.000224552
FBgn0003209	raw	3809.47	3130.97	4827.23	1.54177	0.624587	0.00262516	0.0243558
FBgn0003210	rb	0	0	0	NA	NA	NA	NA
FBgn0003218	rdgB	620.178	440.87	889.14	2.01678	1.01206	5.73467e-06	0.000128818
FBgn0003227	rec	571.689	658.618	441.295	0.670032	-0.577699	0.0140677	0.0873719
FBgn0003231	ref(2)P	3715.12	3311.76	4320.17	1.30449	0.383489	0.0344724	0.166075
FBgn0003248	Rh2	2.93518	4.50252	0.584157	0.12974	-2.9463	0.572645	0.917242
FBgn0003249	Rh3	0	0	0	NA	NA	NA	NA
FBgn0003250	Rh4	2.55512	2.3477	2.86626	1.22088	0.28792	1	1
FBgn0003254	rib	6.19516	9.15695	1.75247	0.191382	-2.38548	0.0220491	0.120281
FBgn0003255	rk	177.822	209.12	130.874	0.625835	-0.676146	0.129505	0.396585
FBgn0003256	rl	3130.12	3183.15	3050.58	0.958354	-0.0613701	0.727825	1
FBgn0003257	r-l	2668.4	2686.64	2641.05	0.98303	-0.0246925	0.775119	1
FBgn0003261	Rm62	104359	94168.3	119645	1.27054	0.345442	0.0537405	0.22357
FBgn0003267	ro	0.653503	0.310295	1.16831	3.76517	1.91272	0.730829	1
FBgn0003268	rod	7113.05	7248.45	6909.96	0.953302	-0.0689946	0.438625	0.809422
FBgn0003270	amos	1.14218	1.90363	0	0	#NAME?	0.929461	1
FBgn0003274	RpLP2	118027	84888.5	167734	1.97593	0.982535	4.91004e-05	0.000846649
FBgn0003275	RpII18	3285.54	3102.78	3559.68	1.14726	0.198187	0.230607	0.570169
FBgn0003277	RpII215	14733	15092.5	14193.8	0.940452	-0.0885735	0.482919	0.847593
FBgn0003278	RpI135	2578.11	2668.02	2443.25	0.915753	-0.12697	0.332886	0.697765
FBgn0003279	RpL4	101758	89982	119423	1.32718	0.408369	0.0404669	0.184603
FBgn0003285	rst	0	0	0	NA	NA	NA	NA
FBgn0003292	rt	2273.87	2239.99	2324.71	1.03782	0.0535575	0.863368	1
FBgn0003295	ru	0	0	0	NA	NA	NA	NA
FBgn0003300	run	1.76322	2.30175	0.955419	0.415084	-1.26852	0.888572	1
FBgn0003301	rut	3417.65	4265.63	2145.68	0.503015	-0.991328	0.000782564	0.00932943
FBgn0003302	rux	488.413	478.253	503.652	1.05311	0.074653	0.561095	0.907672
FBgn0003308	ry	117.355	181.044	21.8215	0.120531	-3.05252	7.10685e-08	2.22787e-06
FBgn0003310	S	4145.13	4766.08	3213.7	0.674286	-0.568567	0.00195169	0.0191327
FBgn0003312	sad	77.5902	100.255	43.5937	0.43483	-1.20148	0.0501645	0.213038
FBgn0003313	sala	0	0	0	NA	NA	NA	NA
FBgn0003317	sax	2949.9	2955.49	2941.52	0.995274	-0.00683418	0.892151	1
FBgn0003319	Sb	1532.54	2261.61	438.93	0.194079	-2.36528	2.38151e-06	5.83911e-05
FBgn0003321	sbr	5356.39	5365.07	5343.37	0.995954	-0.005849	0.984578	1
FBgn0003326	sca	2362.71	2870.55	1600.95	0.557717	-0.842395	0.0396644	0.182197
FBgn0003328	scb	5450.04	3753.15	7995.39	2.13032	1.09107	4.98816e-07	1.38609e-05
FBgn0003330	Sce	1758.92	1888.65	1564.31	0.828271	-0.271825	0.209425	0.537494
FBgn0003334	Scm	3368.81	3659.4	2932.93	0.801477	-0.319266	0.0859584	0.302211
FBgn0003339	Scr	33.0397	20.8718	51.2915	2.45746	1.29717	2.23091e-05	0.000433621
FBgn0003345	sd	19274.2	21805.2	15477.6	0.709812	-0.494491	0.00241721	0.0227262
FBgn0003346	RanGap	7267.19	7870.9	6361.62	0.808245	-0.307136	0.0886236	0.308116
FBgn0003353	sei	858.625	894.205	805.256	0.900527	-0.151159	0.590877	0.931334
FBgn0003356	Jon99Cii	2.88278	4.80464	0	0	#NAME?	0.626917	0.953938
FBgn0003357	Jon99Ciii	51.2541	85.034	0.584157	0.00686969	-7.18554	0.2256	0.561348
FBgn0003358	Jon99Ci	15.2887	19.8543	8.4404	0.425117	-1.23407	0.372363	0.743816
FBgn0003360	sesB	1.04207	1.73678	0	0	#NAME?	0.847259	1
FBgn0003366	sev	24.7123	12.3064	43.321	3.52019	1.81565	0.0424328	0.191092
FBgn0003371	sgg	17153.5	17859.7	16094.1	0.901139	-0.150178	0.316066	0.676752
FBgn0003372	Sgs1	3.97169	5.34559	1.91084	0.357461	-1.48414	0.555327	0.904174
FBgn0003373	Sgs3	5.81784	9.05946	0.955419	0.105461	-3.24522	0.163005	0.457702
FBgn0003374	Sgs4	0	0	0	NA	NA	NA	NA
FBgn0003375	Sgs5	5.41157	8.24041	1.16831	0.141779	-2.81829	0.283484	0.639729
FBgn0003377	Sgs7	6.89209	9.82349	2.49499	0.253983	-1.9772	0.334884	0.699868
FBgn0003378	Sgs8	12.1583	13.3629	10.3512	0.774624	-0.368432	0.733073	1
FBgn0003380	Sh	20.0544	16.5068	25.3757	1.53729	0.620385	0.61786	0.949139
FBgn0003382	sha	7.85736	11.2903	2.70789	0.239841	-2.05985	0.20703	0.533773
FBgn0003386	Shaw	14.7503	19.3101	7.91077	0.409671	-1.28746	0.441471	0.811693
FBgn0003388	shd	32.5217	45.9918	12.3166	0.2678	-1.90077	0.0137951	0.0858684
FBgn0003390	shf	5071.22	5717.83	4101.31	0.717285	-0.479383	0.0122907	0.0786803
FBgn0003391	shg	20873.3	21903.2	19328.6	0.882459	-0.180399	0.242148	0.587711
FBgn0003392	shi	7605.1	8204.19	6706.47	0.817445	-0.290807	0.0778367	0.283854
FBgn0003396	shn	10704.9	11221	9930.68	0.885012	-0.176232	0.395156	0.768328
FBgn0003401	shu	555.589	482.724	664.887	1.37736	0.461909	0.0255595	0.134351
FBgn0003410	sina	0	0	0	NA	NA	NA	NA
FBgn0003411	sisA	0.444959	0.35216	0.584157	1.65879	0.730127	0.839737	1
FBgn0003415	skd	9131.63	10163.5	7583.84	0.746184	-0.422396	0.0197725	0.110322
FBgn0003416	sl	2566.09	2709.15	2351.51	0.867988	-0.204252	0.23002	0.569058
FBgn0003423	slgA	5088.9	5905.04	3864.69	0.654474	-0.611592	0.000377806	0.00500804
FBgn0003425	sli	10809.6	12506.8	8263.8	0.660744	-0.597837	0.0577207	0.234086
FBgn0003429	slo	12.456	14.3541	9.60872	0.669405	-0.579049	0.60962	0.943455
FBgn0003430	slp1	8.18974	3.38573	15.3958	4.54724	2.18499	0.0350999	0.167766
FBgn0003435	sm	444.216	716.29	36.1035	0.0504034	-4.31034	0.000862963	0.0101284
FBgn0003444	smo	3912.68	4404.21	3175.38	0.720988	-0.471954	0.0180022	0.103418
FBgn0003447	sn	12919.2	14086.2	11168.7	0.79288	-0.334825	0.0716049	0.270364
FBgn0003448	sna	2.89231	2.1308	4.03457	1.89345	0.92102	0.742653	1
FBgn0003449	snf	3322.14	3617.1	2879.7	0.796135	-0.328915	0.0838954	0.297936
FBgn0003450	snk	0.83077	1.38462	0	0	#NAME?	0.982245	1
FBgn0003459	stwl	1522.39	1426.67	1665.97	1.16773	0.223711	0.246995	0.593821
FBgn0003460	so	937.54	628.623	1400.92	2.22855	1.1561	2.95277e-05	0.000554765
FBgn0003462	Sod	6255.65	7043.57	5073.76	0.720339	-0.473252	0.0142347	0.0880397
FBgn0003463	sog	6887.71	4174.11	10958.1	2.62525	1.39246	0.000251567	0.00351694
FBgn0003464	sol	5225.54	4632.16	6115.61	1.32025	0.400811	0.0375316	0.175361
FBgn0003475	spir	842.798	417.273	1481.08	3.54944	1.82759	0.00135165	0.0145704
FBgn0003479	spn-A	722.06	666.67	805.147	1.20771	0.272279	0.194544	0.510586
FBgn0003480	spn-B	234.373	212.934	266.531	1.25171	0.323895	0.183904	0.49219
FBgn0003482	spn-D	97.7175	65.5638	145.948	2.22605	1.15449	0.00387733	0.0330822
FBgn0003483	spn-E	324.628	281.466	389.37	1.38336	0.468179	0.0770169	0.282379
FBgn0003486	spo	4.1407	5.23784	2.49499	0.476341	-1.06993	0.750219	1
FBgn0003495	spz	111.029	88.8778	144.255	1.62308	0.698731	0.162268	0.456539
FBgn0003499	sr	527.606	766.081	169.893	0.221769	-2.17287	2.46679e-05	0.00047213
FBgn0003502	Btk29A	10445.5	10105.2	10956	1.08419	0.116615	0.757023	1
FBgn0003507	srp	143.527	147.678	137.3	0.929729	-0.105118	0.899223	1
FBgn0003510	Sry-alpha	334.755	356.896	301.544	0.844908	-0.243134	0.360593	0.731455
FBgn0003511	Sry-beta	923.753	918.618	931.457	1.01398	0.0200243	0.823824	1
FBgn0003512	Sry-delta	2375.89	2163.81	2694.01	1.24503	0.316182	0.103907	0.342723
FBgn0003513	ss	1571.9	1796.5	1235	0.687447	-0.540679	0.0428516	0.191937
FBgn0003514	sqh	9051.24	7907.31	10767.2	1.36167	0.445378	0.0148702	0.0908028
FBgn0003515	st	0	0	0	NA	NA	NA	NA
FBgn0003517	sta	122035	114550	133263	1.16336	0.218295	0.321513	0.684373
FBgn0003520	stau	5573.56	5780.92	5262.5	0.910322	-0.135551	0.423665	0.795449
FBgn0003525	stg	9507.24	7009.36	13254.1	1.89091	0.919081	0.00558186	0.0434728
FBgn0003527	stil	57.7801	66.3603	44.9099	0.676759	-0.563287	0.342978	0.710698
FBgn0003545	sub	2610.93	2503.32	2772.34	1.10747	0.147262	0.461842	0.829464
FBgn0003557	Su(dx)	3529.63	3761.32	3182.09	0.846003	-0.241265	0.136728	0.410548
FBgn0003559	su(f)	3763.91	3811.06	3693.19	0.969072	-0.0453237	0.87351	1
FBgn0003567	su(Hw)	5244.71	5463.85	4916.01	0.899735	-0.152428	0.392219	0.76475
FBgn0003575	su(s)	4042.08	4187.15	3824.47	0.913381	-0.130712	0.499471	0.861859
FBgn0003598	Su(var)3-7	4610.68	5019.3	3997.75	0.796475	-0.328298	0.0637117	0.249222
FBgn0003607	Su(var)205	17767.8	18767	16269.1	0.866902	-0.206059	0.274887	0.630239
FBgn0003612	Su(var)2-10	6100.01	6568.06	5397.94	0.821848	-0.283057	0.11214	0.360475
FBgn0003638	su(w[a])	10798.9	9920.75	12116.2	1.2213	0.288415	0.0728106	0.273137
FBgn0003651	svp	1006.21	1266.11	616.358	0.486811	-1.03857	0.00157452	0.0162719
FBgn0003654	sw	2127.71	2203.59	2013.9	0.913918	-0.129864	0.400463	0.772905
FBgn0003655	swa	3.36667	3.2745	3.50494	1.07038	0.0981179	0.828942	1
FBgn0003656	sws	1434.38	1472.31	1377.49	0.935596	-0.0960423	0.697237	0.995269
FBgn0003659	Sxl	0	0	0	NA	NA	NA	NA
FBgn0003660	Syb	0	0	0	NA	NA	NA	NA
FBgn0003676	T-cp1	12050.3	12238.5	11768.1	0.961564	-0.0565457	0.631972	0.958107
FBgn0003683	term	0.152805	0.254675	0	0	#NAME?	1	1
FBgn0003687	Tbp	1147.09	1197.32	1071.73	0.895107	-0.159868	0.528018	0.885592
FBgn0003701	thr	1634.2	1627.43	1644.37	1.01041	0.0149375	0.858432	1
FBgn0003710	tipE	4.1447	6.27089	0.955419	0.152358	-2.71447	0.394765	0.768099
FBgn0003714	tko	1093.09	1043.3	1167.76	1.11929	0.162583	0.424835	0.796425
FBgn0003715	CG16778	2.63472	3.1173	1.91084	0.612978	-0.706094	0.601091	0.937455
FBgn0003716	tkv	19414.8	19420.9	19405.6	0.999211	-0.00113828	0.999707	1
FBgn0003719	tld	4108.68	3113.44	5601.53	1.79915	0.847312	2.81607e-05	0.000531746
FBgn0003720	tll	0.305611	0.509351	0	0	#NAME?	1	1
FBgn0003721	Tm1	29317.5	28534.9	30491.4	1.06857	0.0956758	0.779718	1
FBgn0003731	Egfr	15857.9	17548.6	13321.9	0.759142	-0.397557	0.0171815	0.100515
FBgn0003732	Top2	30843.1	32949	27684.2	0.840215	-0.25117	0.116012	0.369585
FBgn0003733	tor	18.7935	17.9796	20.0145	1.11318	0.154686	0.95454	1
FBgn0003741	tra	558.124	643.351	430.282	0.668813	-0.580325	0.0382679	0.177421
FBgn0003742	tra2	2116.19	1966.34	2340.98	1.19053	0.251598	0.141368	0.419334
FBgn0003744	trc	3338.57	3686.46	2816.74	0.764075	-0.388213	0.0300633	0.150237
FBgn0003747	Gr5a	16.0688	15.1381	17.465	1.15371	0.206282	0.991423	1
FBgn0003748	Treh	2422.51	2732.19	1957.98	0.716634	-0.480692	0.0507867	0.214789
FBgn0003751	trk	23.4832	24.8386	21.4502	0.863585	-0.211589	0.94312	1
FBgn0003861	trp	0.305611	0.509351	0	0	#NAME?	1	1
FBgn0003862	trx	17653.3	21329.1	12139.7	0.569162	-0.813089	0.00515008	0.0412182
FBgn0003863	alphaTry	0.152805	0.254675	0	0	#NAME?	1	1
FBgn0003865	tsg	7.72712	9.69381	4.77709	0.492799	-1.02093	0.559917	0.907184
FBgn0003866	tsh	16492.5	13932.4	20332.7	1.45938	0.545354	0.00508758	0.0408288
FBgn0003867	tsl	2121	2271.93	1894.61	0.833923	-0.262014	0.231228	0.571419
FBgn0003870	ttk	8617.79	10063.5	6449.19	0.640849	-0.641944	0.000432416	0.00563242
FBgn0003882	tub	2113.61	2060.57	2193.16	1.06435	0.0899706	0.523275	0.880917
FBgn0003884	alphaTub84B	120126	132669	101311	0.763642	-0.389032	0.013448	0.0840797
FBgn0003885	alphaTub84D	6560.97	7264	5506.43	0.758044	-0.399647	0.0154898	0.0932704
FBgn0003886	alphaTub85E	137.579	207.391	32.8607	0.158448	-2.65791	0.348402	0.716411
FBgn0003887	betaTub56D	116141	130250	94978.3	0.7292	-0.455613	0.0070983	0.0525502
FBgn0003888	betaTub60D	8139.62	12413.2	1729.21	0.139304	-2.84369	1.10977e-13	9.11634e-12
FBgn0003889	betaTub85D	7.80836	6.1131	10.3512	1.69329	0.759827	0.780474	1
FBgn0003890	betaTub97EF	270.517	405.268	68.3905	0.168754	-2.56701	8.89186e-06	0.00019244
FBgn0003891	tud	20994.8	21631	20040.6	0.926476	-0.110174	0.402802	0.775293
FBgn0003892	ptc	7340.11	7898.65	6502.3	0.823217	-0.280655	0.185619	0.495077
FBgn0003896	tup	2302.27	1946.07	2836.57	1.45759	0.543585	0.0739591	0.275882
FBgn0003900	twi	1308.16	1298.92	1322.01	1.01778	0.0254195	0.696774	0.995113
FBgn0003916	snRNA:U1:21D	0	0	0	NA	NA	NA	NA
FBgn0003920	snRNA:U2:14B	0.372354	0.62059	0	0	#NAME?	1	1
FBgn0003922	snRNA:U2:38ABa	0	0	0	NA	NA	NA	NA
FBgn0003923	snRNA:U2:38ABb	0	0	0	NA	NA	NA	NA
FBgn0003926	snRNA:U3:22A	0	0	0	NA	NA	NA	NA
FBgn0003930	snRNA:U4:39B	0	0	0	NA	NA	NA	NA
FBgn0003931	snRNA:U4:38AB	0	0	0	NA	NA	NA	NA
FBgn0003933	snRNA:U5:14B	0	0	0	NA	NA	NA	NA
FBgn0003934	snRNA:U5:23D	0	0	0	NA	NA	NA	NA
FBgn0003935	snRNA:U5:34A	0.41984	0.310295	0.584157	1.88259	0.912716	0.871154	1
FBgn0003936	snRNA:U5:35D	0	0	0	NA	NA	NA	NA
FBgn0003938	snRNA:U5:63BC	16.2553	5.10876	32.975	6.4546	2.69033	0.0536533	0.223398
FBgn0003941	RpL40	56054.2	48140.8	67924.4	1.41095	0.49667	0.0103187	0.0692876
FBgn0003942	RpS27A	83707.8	76712.6	94200.7	1.22797	0.296273	0.23711	0.579777
FBgn0003943	Ubi-p63E	4899.66	5450.09	4074.02	0.747516	-0.419824	0.0624013	0.245977
FBgn0003944	Ubx	507.2	496.204	523.695	1.0554	0.0777928	0.814284	1
FBgn0003950	unc	201.024	213.105	182.903	0.858278	-0.220483	0.566398	0.911909
FBgn0003961	Uro	0	0	0	NA	NA	NA	NA
FBgn0003963	ush	3111.05	3712.45	2208.96	0.595014	-0.749004	0.000362812	0.00483778
FBgn0003964	usp	0	0	0	NA	NA	NA	NA
FBgn0003965	v	2.50529	0.56497	5.41578	9.58595	3.26092	0.252132	0.600445
FBgn0003969	vap	6187.86	6453.49	5789.4	0.897096	-0.156666	0.431032	0.80272
FBgn0003975	vg	8603.01	11498.7	4259.49	0.370433	-1.43272	3.22396e-07	9.2794e-06
FBgn0003977	vir	3175.59	3667.1	2438.34	0.664922	-0.588742	0.0015358	0.0159888
FBgn0003978	vls	1216.68	1202.4	1238.1	1.0297	0.0422211	0.821597	1
FBgn0003979	Vm26Aa	0.77964	0.662455	0.955419	1.44224	0.528312	0.995726	1
FBgn0003980	Vm26Ab	1.96902	1.37086	2.86626	2.09084	1.06409	0.867114	1
FBgn0003983	Vm34Ca	13.5522	19.7553	4.24747	0.215004	-2.21757	0.111332	0.358692
FBgn0003984	vn	5953.78	4467.65	8182.97	1.83161	0.87311	3.69805e-05	0.000673429
FBgn0003996	w	0	0	0	NA	NA	NA	NA
FBgn0003997	W	4742.52	3932.64	5957.34	1.51485	0.599171	0.0125974	0.0800965
FBgn0004003	wbl	1744.26	2698.82	312.43	0.115766	-3.11072	1.85237e-06	4.65325e-05
FBgn0004009	wg	3176.93	3871.79	2134.65	0.551334	-0.859001	2.53904e-05	0.000483492
FBgn0004028	wupA	120.437	158.861	62.8007	0.395319	-1.33891	0.179469	0.484333
FBgn0004034	y	0	0	0	NA	NA	NA	NA
FBgn0004045	Yp1	6.61556	7.45177	5.36125	0.71946	-0.475013	0.742698	1
FBgn0004047	Yp3	18.1888	19.0244	16.9353	0.890191	-0.167814	0.902318	1
FBgn0004049	yrt	6445.19	7129.57	5418.63	0.760022	-0.395887	0.019768	0.110322
FBgn0004050	z	0	0	0	NA	NA	NA	NA
FBgn0004052	Z600	0.606017	0.62059	0.584157	0.941293	-0.0872842	0.962104	1
FBgn0004053	zen	0	0	0	NA	NA	NA	NA
FBgn0004054	zen2	0	0	0	NA	NA	NA	NA
FBgn0004055	uzip	4330.78	3441.45	5664.78	1.64604	0.719004	0.0003728	0.00495921
FBgn0004057	Zw	1269.97	1222.38	1341.36	1.09733	0.133994	0.543174	0.896203
FBgn0004066	Pros28.1	7510.21	7803.16	7070.78	0.906143	-0.14219	0.405468	0.778493
FBgn0004087	Dhfr	1238.5	1207.8	1284.53	1.06353	0.0888546	0.555168	0.904077
FBgn0004101	bs	4108.69	6087.66	1140.23	0.187301	-2.41657	3.06489e-29	1.07788e-26
FBgn0004102	oc	31.8584	11.7909	61.9595	5.25485	2.39365	0.0486912	0.208611
FBgn0004103	Pp1-87B	20942.4	22823.2	18121.2	0.793984	-0.332818	0.0429051	0.191937
FBgn0004106	cdc2	5268.08	5839.39	4411.11	0.755406	-0.404676	0.0295	0.148277
FBgn0004107	cdc2c	1612.09	1690.35	1494.71	0.884261	-0.177457	0.782168	1
FBgn0004108	Nrt	3140.83	4205.15	1544.34	0.367251	-1.44516	1.18237e-08	4.30629e-07
FBgn0004110	tin	5.31488	4.85817	5.99994	1.23502	0.304535	0.81954	1
FBgn0004117	Tm2	164.803	193.132	122.309	0.633294	-0.659053	0.528844	0.885959
FBgn0004118	nAcRbeta-96A	8.27118	6.70618	10.6187	1.58341	0.663039	0.581959	0.923227
FBgn0004132	boca	2084.9	2217.44	1886.08	0.850568	-0.233502	0.3155	0.675925
FBgn0004133	blow	5780.05	5579.83	6080.4	1.08971	0.123945	0.438253	0.809422
FBgn0004143	nullo	0	0	0	NA	NA	NA	NA
FBgn0004167	kst	32840.5	35276.3	29186.9	0.827379	-0.27338	0.328438	0.6927
FBgn0004168	5-HT1A	23.3033	36.9279	2.86626	0.0776176	-3.68747	0.0183651	0.105127
FBgn0004169	up	318.611	369.214	242.708	0.657363	-0.605237	0.611034	0.944279
FBgn0004170	sc	0	0	0	NA	NA	NA	NA
FBgn0004171	Mst98Cb	0	0	0	NA	NA	NA	NA
FBgn0004172	Mst84Da	0	0	0	NA	NA	NA	NA
FBgn0004173	Mst84Db	0	0	0	NA	NA	NA	NA
FBgn0004174	Mst84Dc	0.186177	0.310295	0	0	#NAME?	1	1
FBgn0004175	Mst84Dd	0	0	0	NA	NA	NA	NA
FBgn0004177	mts	28504.9	29174	27501.3	0.942665	-0.0851826	0.599345	0.936809
FBgn0004179	Csp	6542.79	7055.33	5773.97	0.818384	-0.289149	0.0939451	0.319349
FBgn0004181	Peb	0	0	0	NA	NA	NA	NA
FBgn0004183	snRNA:U1:82Eb	4.16063	4.38659	3.82168	0.871217	-0.198896	0.963333	1
FBgn0004185	snRNA:U1:95Ca	0	0	0	NA	NA	NA	NA
FBgn0004186	snRNA:U1:95Cb	0	0	0	NA	NA	NA	NA
FBgn0004187	snRNA:U1:95Cc	0	0	0	NA	NA	NA	NA
FBgn0004188	snRNA:U6:96Aa	0	0	0	NA	NA	NA	NA
FBgn0004189	snRNA:U6:96Ab	1.28949	0.875265	1.91084	2.18315	1.12641	0.889698	1
FBgn0004190	snRNA:U6:96Ac	1.02036	1.31115	0.584157	0.445529	-1.16641	1	1
FBgn0004191	snRNA:U2:34ABa	13.6238	20.7591	2.92079	0.140699	-2.82931	0.0575035	0.233458
FBgn0004192	snRNA:U2:34ABb	1.78468	2.97447	0	0	#NAME?	0.811606	1
FBgn0004197	Ser	15859.8	16418.8	15021.2	0.91488	-0.128346	0.356707	0.727112
FBgn0004198	ct	2113.23	2629.68	1338.56	0.50902	-0.974206	5.12024e-05	0.000878403
FBgn0004227	nonA	10765.5	12344.5	8397.04	0.680227	-0.555911	0.00173859	0.0175766
FBgn0004228	mex1	14.9088	16.2475	12.9008	0.794016	-0.33276	0.779142	1
FBgn0004237	Hrb87F	25942.6	30603.6	18951	0.61924	-0.69143	0.000103686	0.00162973
FBgn0004240	Dpt	1.72345	0.819646	3.07915	3.75669	1.90946	0.637328	0.960301
FBgn0004242	Syt1	96.7164	152.452	13.1137	0.0860185	-3.53921	6.25805e-05	0.00104338
FBgn0004244	Rdl	9.12618	7.63618	11.3612	1.48781	0.573191	0.803388	1
FBgn0004359	T48	1710.99	1840.33	1516.99	0.824305	-0.27875	0.167686	0.465546
FBgn0004360	Wnt2	1305.41	1496.49	1018.81	0.680798	-0.554702	0.17914	0.484059
FBgn0004362	HmgD	69488.6	71472.8	66512.2	0.930595	-0.103775	0.448639	0.818142
FBgn0004363	porin	24252	26250.3	21254.7	0.809695	-0.30455	0.0848165	0.29985
FBgn0004364	18w	7668.12	8363.04	6625.74	0.792265	-0.335946	0.0698225	0.265423
FBgn0004366	rdgC	0.990936	1.01461	0.955419	0.941657	-0.0867259	1	1
FBgn0004367	mei-41	1444.06	1515.74	1336.54	0.881776	-0.181517	0.40209	0.774864
FBgn0004368	Ptp4E	4334.96	4169.8	4582.7	1.09902	0.136218	0.497466	0.860288
FBgn0004369	Ptp99A	5495.67	5923.07	4854.55	0.8196	-0.287008	0.0780498	0.284355
FBgn0004370	Ptp10D	11289.2	9842.42	13459.3	1.36748	0.451519	0.0330068	0.16089
FBgn0004372	aly	0	0	0	NA	NA	NA	NA
FBgn0004373	fwd	7668.35	8179.36	6901.84	0.843812	-0.245007	0.136923	0.411026
FBgn0004374	neb	1909.34	1920.29	1892.9	0.985735	-0.0207285	0.849315	1
FBgn0004378	Klp61F	7236.72	6964	7645.8	1.0979	0.134752	0.633857	0.95895
FBgn0004379	Klp67A	3394.27	3507.95	3223.74	0.918981	-0.121893	0.367071	0.739134
FBgn0004380	Klp64D	436.693	415.09	469.098	1.13011	0.176468	0.332769	0.697649
FBgn0004381	Klp68D	275.376	215.679	364.921	1.69197	0.758702	0.0126729	0.0803851
FBgn0004387	Klp98A	3607.16	3438.72	3859.84	1.12247	0.166671	0.471919	0.836227
FBgn0004389	bnk	0	0	0	NA	NA	NA	NA
FBgn0004390	Gap1	5296.73	5491.61	5004.4	0.911282	-0.13403	0.37599	0.747463
FBgn0004391	shtd	3532.97	3973.12	2872.74	0.723043	-0.467847	0.00606581	0.0464385
FBgn0004394	pdm2	1859.83	2790.63	463.636	0.16614	-2.58953	1.29051e-12	9.30988e-11
FBgn0004395	unk	5676.2	5172.53	6431.69	1.24343	0.314327	0.126974	0.392033
FBgn0004396	CrebA	4009.23	4908.16	2660.83	0.542124	-0.883304	0.00153354	0.0159801
FBgn0004397	Vinc	5375.65	4777.9	6272.27	1.31277	0.392611	0.0938885	0.31933
FBgn0004400	rhi	0	0	0	NA	NA	NA	NA
FBgn0004401	Pep	39369.4	43585.9	33044.8	0.758153	-0.399439	0.0185806	0.10593
FBgn0004403	RpS14a	42220.6	36298.6	51103.7	1.40787	0.493514	0.213787	0.54409
FBgn0004404	RpS14b	13031.3	10811.1	16361.7	1.51342	0.597814	0.0232664	0.125162
FBgn0004406	tam	1039.91	1006.03	1090.73	1.0842	0.116629	0.496763	0.860008
FBgn0004407	DNApol-gamma35	0	0	0	NA	NA	NA	NA
FBgn0004414	msopa	0.152805	0.254675	0	0	#NAME?	1	1
FBgn0004419	me31B	11762.3	12834.8	10153.5	0.791093	-0.338081	0.0617899	0.244323
FBgn0004425	LysB	0	0	0	NA	NA	NA	NA
FBgn0004426	LysC	0	0	0	NA	NA	NA	NA
FBgn0004427	LysD	0	0	0	NA	NA	NA	NA
FBgn0004428	LysE	0	0	0	NA	NA	NA	NA
FBgn0004429	LysP	0	0	0	NA	NA	NA	NA
FBgn0004430	LysS	0	0	0	NA	NA	NA	NA
FBgn0004431	LysX	3.04696	2.63606	3.66331	1.38969	0.474762	0.815508	1
FBgn0004432	Cyp1	55197.2	57206.6	52183.2	0.912189	-0.132596	0.373232	0.745008
FBgn0004435	Galpha49B	6008.23	6058.39	5932.98	0.9793	-0.030177	0.940985	1
FBgn0004436	UbcD6	6725.09	6479.22	7093.9	1.09487	0.130759	0.489024	0.853541
FBgn0004449	Ten-m	23993.7	21644.3	27517.9	1.27137	0.346386	0.574846	0.918732
FBgn0004456	mew	9978.95	10612.8	9028.25	0.850698	-0.233281	0.130735	0.398292
FBgn0004462	Pk17E	2396.06	2591.44	2102.99	0.811515	-0.30131	0.154521	0.443391
FBgn0004463	RpIII128	2280.71	2281.16	2280.04	0.999509	-0.000708006	0.860698	1
FBgn0004465	Su(P)	903.517	816.466	1034.09	1.26655	0.340904	0.068154	0.261152
FBgn0004507	GlyP	7350.89	7635.41	6924.12	0.906844	-0.141074	0.607367	0.941761
FBgn0004509	Fur1	4421.2	4884.6	3726.1	0.762826	-0.390574	0.019493	0.109468
FBgn0004510	Ets97D	1065.88	998.793	1166.51	1.16792	0.223939	0.234787	0.576541
FBgn0004511	dy	103.26	168.879	4.83162	0.0286099	-5.12734	5.06249e-10	2.43475e-08
FBgn0004512	Mdr49	3446.65	2713.01	4547.12	1.67604	0.745058	0.0525069	0.219997
FBgn0004513	Mdr65	59.145	70.7207	41.7814	0.590795	-0.75927	0.278967	0.634235
FBgn0004514	Oct-TyrR	8.85705	4.60349	15.2374	3.30996	1.72682	0.315315	0.675925
FBgn0004516	Gad1	0.656254	0.704319	0.584157	0.829393	-0.269873	0.993233	1
FBgn0004552	Akh	3.85536	4.37284	3.07915	0.704154	-0.506037	0.96309	1
FBgn0004554	Edg91	99.393	107.213	87.6624	0.817645	-0.290454	0.780013	1
FBgn0004556	Dbp73D	1080.65	967.604	1250.23	1.29209	0.369704	0.0517928	0.217735
FBgn0004567	slp2	14.7778	4.91379	29.5739	6.01855	2.58942	0.00575559	0.0444567
FBgn0004569	aos	0	0	0	NA	NA	NA	NA
FBgn0004573	5-HT7	1.98618	0.62059	4.03457	6.50119	2.7007	0.319462	0.681171
FBgn0004574	Rop	3256.17	3413.2	3020.61	0.884979	-0.176285	0.349642	0.717736
FBgn0004575	Syn	4.6957	4.21565	5.41578	1.28469	0.361415	0.760684	1
FBgn0004577	Pxd	55.2248	83.794	12.3711	0.147638	-2.75987	0.000357822	0.00479396
FBgn0004580	Cbp53E	10.2193	6.52088	15.767	2.41793	1.27377	0.458775	0.826883
FBgn0004581	bgcn	31.4667	35.7385	25.059	0.701177	-0.512149	0.463509	0.830092
FBgn0004583	ex	36175.1	29477.4	46221.7	1.56804	0.648962	0.00164733	0.0168537
FBgn0004584	Rrp1	10285.2	10619.1	9784.4	0.9214	-0.1181	0.419988	0.791186
FBgn0004587	B52	25228.9	26366.7	23522.1	0.892112	-0.164704	0.27862	0.634059
FBgn0004588	Eig71Ea	0	0	0	NA	NA	NA	NA
FBgn0004589	Eig71Eb	0	0	0	NA	NA	NA	NA
FBgn0004590	Eig71Ec	0	0	0	NA	NA	NA	NA
FBgn0004591	Eig71Ed	0	0	0	NA	NA	NA	NA
FBgn0004592	Eig71Ee	1.68666	2.8111	0	0	#NAME?	0.761709	1
FBgn0004593	Eig71Ef	0	0	0	NA	NA	NA	NA
FBgn0004594	Eig71Eg	0	0	0	NA	NA	NA	NA
FBgn0004595	pros	63.3792	77.7448	41.8308	0.538052	-0.894183	0.086195	0.302759
FBgn0004597	CycC	854.158	879.393	816.305	0.92826	-0.107399	0.772112	1
FBgn0004598	Fur2	8849.63	9737.3	7518.12	0.772095	-0.373149	0.035519	0.169323
FBgn0004603	Src42A	11167.9	11384.3	10843.3	0.952474	-0.0702483	0.578505	0.920863
FBgn0004606	zfh1	1452.62	1494.84	1389.28	0.92938	-0.105659	0.664017	0.971889
FBgn0004607	zfh2	25589.7	32115.9	15800.4	0.491982	-1.02332	1.70686e-07	5.08174e-06
FBgn0004611	Plc21C	2761.17	2918.24	2525.56	0.86544	-0.208495	0.237135	0.579777
FBgn0004618	gl	4.87539	1.86177	9.39582	5.04671	2.33534	0.127051	0.392058
FBgn0004619	Glu-RI	0	0	0	NA	NA	NA	NA
FBgn0004620	GluRIIA	4.10093	3.75574	4.61873	1.22978	0.298399	0.925956	1
FBgn0004622	Takr99D	2.05262	2.00521	2.12373	1.05911	0.0828516	0.982764	1
FBgn0004623	Gbeta76C	45.0283	30.7743	66.4094	2.15795	1.10966	0.521048	0.878706
FBgn0004624	CaMKII	10719.2	10454.7	11115.9	1.06325	0.0884818	0.767406	1
FBgn0004629	Cys	180.457	47.6934	379.603	7.95923	2.99263	8.7797e-18	1.17627e-15
FBgn0004635	rho	0	0	0	NA	NA	NA	NA
FBgn0004636	R	12188	11863.2	12675.2	1.06844	0.095508	0.819683	1
FBgn0004638	drk	8420.36	8210.63	8734.97	1.06386	0.0893095	0.72653	1
FBgn0004643	mit(1)15	2828.83	2637.85	3115.31	1.181	0.240013	0.18772	0.499156
FBgn0004644	hh	2242.4	2697.02	1560.48	0.578595	-0.789375	0.000120044	0.00183807
FBgn0004646	ogre	17616.9	22662.7	10048.2	0.443379	-1.17339	3.63609e-10	1.81064e-08
FBgn0004647	N	45426	51734.1	35963.9	0.695168	-0.524567	0.0414546	0.187843
FBgn0004648	svr	5555	6394.97	4295.04	0.671628	-0.574266	0.00192395	0.0188936
FBgn0004649	yl	0.83077	1.38462	0	0	#NAME?	0.819634	1
FBgn0004650	fs(1)N	6.55573	4.97907	8.92072	1.79164	0.841283	0.443182	0.812573
FBgn0004652	fru	21691.4	10669.7	38224	3.58246	1.84095	0.000100938	0.00158876
FBgn0004654	Pgd	2334.19	2310.98	2369	1.02511	0.0357781	0.849551	1
FBgn0004655	wapl	4873	5142.37	4468.94	0.869041	-0.202503	0.190977	0.50387
FBgn0004656	fs(1)h	28935.5	31627.5	24897.5	0.78721	-0.345179	0.0570454	0.232419
FBgn0004657	mys	12517	10793.7	15102	1.39915	0.484553	0.0112888	0.0737344
FBgn0004666	sim	3.54294	4.631	1.91084	0.412619	-1.27712	0.736308	1
FBgn0004687	Mlc-c	9760.38	8634.17	11449.7	1.32609	0.40718	0.0320391	0.157544
FBgn0004698	mus210	10300.7	9333.79	11751.1	1.25898	0.33226	0.0916558	0.314576
FBgn0004777	Ccp84Ag	0	0	0	NA	NA	NA	NA
FBgn0004778	Ccp84Af	0	0	0	NA	NA	NA	NA
FBgn0004779	Ccp84Ae	0	0	0	NA	NA	NA	NA
FBgn0004780	Ccp84Ad	0	0	0	NA	NA	NA	NA
FBgn0004781	Ccp84Ac	0.997998	0	2.49499	Inf	Inf	0.570057	0.914528
FBgn0004782	Ccp84Ab	0.338982	0.56497	0	0	#NAME?	1	1
FBgn0004783	Ccp84Aa	1.64258	2.73763	0	0	#NAME?	0.785507	1
FBgn0004784	inaC	0.467326	0	1.16831	Inf	Inf	0.689836	0.989601
FBgn0004795	retn	4.57131	5.70801	2.86626	0.502146	-0.993821	0.258578	0.609299
FBgn0004797	mdy	1238.95	1135.47	1394.17	1.22784	0.296118	0.110105	0.356172
FBgn0004811	fs(2)ltoPP43	2024.3	2258.94	1672.34	0.74032	-0.433779	0.0548172	0.226889
FBgn0004828	His3.3B	45153.7	45467	44683.8	0.982772	-0.0250706	0.76919	1
FBgn0004832	Xpac	1019.6	1035.54	995.677	0.961505	-0.0566333	0.771364	1
FBgn0004837	Su(H)	1147.37	1126.91	1178.07	1.0454	0.0640563	0.686365	0.987138
FBgn0004838	Hrb27C	78092.6	84876.7	67916.4	0.800177	-0.321608	0.0475604	0.20567
FBgn0004839	otk	4158.94	3955.17	4464.6	1.1288	0.174791	0.60091	0.937455
FBgn0004841	Takr86C	8.2104	13.0471	0.955419	0.0732287	-3.77145	0.176908	0.480319
FBgn0004842	NepYr	1.33488	1.05648	1.75247	1.65879	0.730127	0.714507	1
FBgn0004852	Ac76E	159.079	47.8341	325.946	6.8141	2.76852	8.13143e-23	1.83022e-20
FBgn0004854	B-H2	267.456	357.754	132.009	0.368994	-1.43833	0.00524531	0.0416644
FBgn0004855	RpII15	1727.25	1730.94	1721.71	0.994666	-0.00771523	0.936112	1
FBgn0004856	Bx42	3966.56	4029.3	3872.45	0.961073	-0.0572826	0.802684	1
FBgn0004858	elB	3877.24	4557.21	2857.29	0.626981	-0.673506	0.000173358	0.00252717
FBgn0004859	ci	21973.1	22844	20666.8	0.904696	-0.144495	0.339355	0.705935
FBgn0004860	ph-d	1842.82	2148.33	1384.56	0.644481	-0.633791	0.00129801	0.0141452
FBgn0004861	ph-p	5066.84	5938.9	3758.75	0.632903	-0.659943	0.000220379	0.00312754
FBgn0004862	bap	0.152805	0.254675	0	0	#NAME?	1	1
FBgn0004863	C15	305.679	340.939	252.789	0.741449	-0.43158	0.356445	0.72684
FBgn0004864	hop	3538.37	3981.72	2873.34	0.721633	-0.470663	0.0152545	0.0925007
FBgn0004865	Eip78C	1342.11	2200.12	55.1028	0.0250453	-5.31931	5.74716e-09	2.26462e-07
FBgn0004867	RpS2	104697	91929.8	123848	1.3472	0.42996	0.039122	0.180438
FBgn0004868	Gdi	13741	15362.5	11308.7	0.736126	-0.441976	0.0117672	0.0761956
FBgn0004870	bab1	156.958	200.363	91.8501	0.458418	-1.12527	0.00993696	0.0674898
FBgn0004872	piwi	132.846	101.561	179.775	1.77012	0.823847	0.0288201	0.145771
FBgn0004875	enc	7882.71	8672.36	6698.24	0.772367	-0.372642	0.0219217	0.119644
FBgn0004876	cdi	7124.46	5875.05	8998.56	1.53166	0.615093	0.0685374	0.262175
FBgn0004878	cas	27.7244	28.6168	26.3857	0.922034	-0.117109	0.865717	1
FBgn0004880	scrt	8.36441	11.0035	4.40583	0.400404	-1.32047	0.383295	0.755373
FBgn0004882	orb	36.9352	35.7935	38.6478	1.07974	0.110688	1	1
FBgn0004885	tok	15548.7	18243.9	11505.9	0.630672	-0.665039	0.000109131	0.00169809
FBgn0004888	Scsalpha	6085.12	5750.68	6586.79	1.14539	0.195842	0.289013	0.646375
FBgn0004889	tws	11521.6	12450.8	10127.8	0.813425	-0.297919	0.0926443	0.316617
FBgn0004892	sob	2520.47	1781.77	3628.52	2.03647	1.02607	2.82643e-08	9.60987e-07
FBgn0004893	bowl	18454.3	22495.2	12392.9	0.550915	-0.8601	1.60193e-06	4.06038e-05
FBgn0004895	fd64A	0.458416	0.764026	0	0	#NAME?	0.940007	1
FBgn0004896	fd59A	2.99852	3.3342	2.49499	0.748303	-0.418305	0.86419	1
FBgn0004897	fd96Ca	3.82503	4.42786	2.92079	0.659638	-0.600253	1	1
FBgn0004898	fd96Cb	26.1668	24.1065	29.2572	1.21366	0.279366	0.281896	0.637935
FBgn0004901	Prat	2827.62	2815.02	2846.52	1.01119	0.016053	0.936429	1
FBgn0004903	Rb97D	2649.54	2731.91	2525.99	0.924625	-0.11306	0.638028	0.960841
FBgn0004907	14-3-3zeta	56041.4	51178.2	63336.3	1.23757	0.307505	0.129615	0.396599
FBgn0004908	Arf84F	628.441	644.359	604.565	0.938244	-0.0919656	0.789904	1
FBgn0004910	Eip63F-1	145.563	83.9233	238.022	2.83618	1.50395	4.40723e-05	0.000774984
FBgn0004911	Eip63F-2	0.233663	0	0.584157	Inf	Inf	0.742188	1
FBgn0004913	Gnf1	4737.36	4401.94	5240.49	1.1905	0.251563	0.248928	0.595797
FBgn0004914	Hnf4	1698.68	1643.06	1782.12	1.08463	0.117209	0.509806	0.870747
FBgn0004915	TfIIB	2599.61	2728.8	2405.81	0.881636	-0.181745	0.35869	0.729305
FBgn0004919	gol	37.2843	13.9264	72.3212	5.1931	2.3766	1.38592e-05	0.00028002
FBgn0004921	Ggamma1	11781.7	11218.2	12626.9	1.12557	0.170659	0.387252	0.759634
FBgn0004924	Top1	10863.2	12676.5	8143.27	0.642388	-0.638483	0.000393683	0.00516979
FBgn0004926	eIF-2beta	10966.6	10855.8	11132.8	1.02551	0.0363481	0.844046	1
FBgn0004956	os	804.625	329.165	1517.81	4.6111	2.20511	1.27036e-08	4.59698e-07
FBgn0004957	por	1371.7	1531.34	1132.25	0.739381	-0.43561	0.0436527	0.19433
FBgn0004959	phm	81.2131	65.4485	104.86	1.60218	0.680033	0.0831755	0.296502
FBgn0005198	gig	3014	3119.38	2855.92	0.915541	-0.127303	0.322234	0.684784
FBgn0005278	Sam-S	23040	17828.1	30857.9	1.73085	0.791482	6.22769e-05	0.00103986
FBgn0005322	nmd	1726.04	1595.33	1922.1	1.20483	0.268825	0.15634	0.446495
FBgn0005355	Su(fu)	1562.1	1755.96	1271.3	0.723992	-0.465954	0.0392679	0.180893
FBgn0005386	ash1	2745.84	3125.52	2176.31	0.696303	-0.522212	0.00550815	0.0429582
FBgn0005390	fs(1)M3	0.83077	1.38462	0	0	#NAME?	0.865118	1
FBgn0005391	Yp2	10.0615	12.2742	6.74246	0.549318	-0.864288	0.662835	0.971042
FBgn0005410	sno	3596.7	3743.87	3375.94	0.901725	-0.149241	0.25294	0.601688
FBgn0005411	U2af50	5937.09	5961.77	5900.08	0.989653	-0.0150058	0.960031	1
FBgn0005427	ewg	3569.3	3350.2	3897.94	1.16349	0.218461	0.325901	0.689934
FBgn0005533	RpS17	47229.2	41843	55308.5	1.32181	0.402515	0.0432379	0.192865
FBgn0005536	Mbs	6777.53	7610.75	5527.71	0.726303	-0.461357	0.00659815	0.0497025
FBgn0005558	ey	19.9976	23.0655	15.3958	0.66748	-0.583204	0.398225	0.771406
FBgn0005561	sv	14.5022	21.6226	3.82168	0.176745	-2.50026	1.0749e-05	0.000225219
FBgn0005564	Shal	70.1299	90.019	40.2964	0.447643	-1.15958	0.0312454	0.154605
FBgn0005585	Crc	41750.1	46949.2	33951.4	0.723152	-0.46763	0.0120215	0.0773971
FBgn0005586	Rab3	22.8721	25.061	19.5887	0.781639	-0.355425	0.581674	0.923227
FBgn0005590	scw	0	0	0	NA	NA	NA	NA
FBgn0005592	btl	388.545	399.878	371.544	0.929144	-0.106027	0.807241	1
FBgn0005593	RpL7	91090.7	80908.3	106364	1.31463	0.394656	0.049868	0.211939
FBgn0005596	yemalpha	2546.52	2753.16	2236.56	0.812361	-0.299806	0.0938895	0.31933
FBgn0005612	Sox14	1001.78	1076.4	889.855	0.826692	-0.274578	0.300981	0.66088
FBgn0005613	Sox15	6523.65	6957.75	5872.49	0.844021	-0.24465	0.133607	0.404197
FBgn0005614	trpl	1.49318	0.930885	2.33663	2.51011	1.32775	0.598243	0.936257
FBgn0005616	msl-2	2445.81	1511.66	3847.04	2.54491	1.34761	1.91317e-11	1.14526e-09
FBgn0005617	msl-1	3254.8	3393.1	3047.34	0.898101	-0.15505	0.377213	0.748876
FBgn0005619	Hdc	17.7204	22.5968	10.4058	0.460497	-1.11874	0.332244	0.697327
FBgn0005624	Psc	4420.14	5066.45	3450.68	0.681084	-0.554095	0.0203071	0.1122
FBgn0005626	ple	999.236	321.916	2015.22	6.26007	2.64618	0.0288921	0.145943
FBgn0005630	lola	35937.4	34669.4	37839.3	1.09143	0.126222	0.812697	1
FBgn0005631	robo	4221.45	5069.53	2949.33	0.581776	-0.781463	4.56059e-05	0.00079697
FBgn0005632	faf	13081.1	15009.7	10188.2	0.678777	-0.55899	0.00517327	0.0412908
FBgn0005633	fln	0.849493	0	2.12373	Inf	Inf	0.511938	0.872
FBgn0005634	zip	72392.3	65935.2	82078	1.24483	0.315948	0.418512	0.789331
FBgn0005636	nvy	977.575	720.901	1362.58	1.89011	0.918473	0.0283479	0.143836
FBgn0005638	slbo	10.479	12.2968	7.75241	0.630442	-0.665564	0.740789	1
FBgn0005640	Eip63E	5321.24	5725.45	4714.93	0.823505	-0.280151	0.222819	0.557369
FBgn0005642	wdn	2796.05	2805.84	2781.36	0.991272	-0.0126471	0.971047	1
FBgn0005648	Pabp2	13823.3	12746.6	15438.3	1.21117	0.276401	0.140854	0.418472
FBgn0005649	Rox8	9316.03	10493.3	7550.09	0.719514	-0.474906	0.0127751	0.0806341
FBgn0005654	lat	0	0	0	NA	NA	NA	NA
FBgn0005655	mus209	9472.54	9320.01	9701.34	1.04091	0.0578517	0.684639	0.985701
FBgn0005658	Ets65A	0.338982	0.56497	0	0	#NAME?	1	1
FBgn0005659	Ets98B	745.315	625.755	924.655	1.47766	0.563317	0.0487142	0.208611
FBgn0005660	Ets21C	1033.72	141.347	2372.27	16.7833	4.06896	1.05739e-27	3.39997e-25
FBgn0005664	Cry	0.458416	0.764026	0	0	#NAME?	1	1
FBgn0005666	bt	182.327	198.169	158.566	0.800157	-0.321645	0.751781	1
FBgn0005670	Cyp4d1	18.8879	13.216	27.3956	2.07291	1.05166	0.340585	0.707278
FBgn0005671	Vha55	6413.59	6177.75	6767.34	1.09544	0.131506	0.53612	0.891863
FBgn0005672	spi	7026.37	4954.39	10134.3	2.04552	1.03247	3.77112e-05	0.000683417
FBgn0005674	Aats-glupro	13200.7	14451.6	11324.3	0.783606	-0.3518	0.0571287	0.232607
FBgn0005677	dac	1186.28	1785.06	288.111	0.161401	-2.63128	1.93949e-24	5.07605e-22
FBgn0005683	pie	563.672	498.565	661.333	1.32647	0.407593	0.0478935	0.20643
FBgn0005694	Aef1	2112.01	2374.49	1718.29	0.723647	-0.466642	0.0144669	0.0891493
FBgn0005695	gcl	841.638	665.483	1105.87	1.66176	0.732708	0.00056541	0.00707013
FBgn0005696	DNApol-alpha73	1209.07	1048.94	1449.27	1.38165	0.466389	0.0179807	0.103348
FBgn0005771	noc	5619.51	5602.02	5645.75	1.00781	0.0112188	0.824383	1
FBgn0005775	Con	70.203	104.688	18.4749	0.176475	-2.50246	6.97364e-05	0.00115414
FBgn0005777	PpD3	3167.56	3217.53	3092.6	0.961174	-0.0571308	0.655542	0.969757
FBgn0005778	PpD5	0	0	0	NA	NA	NA	NA
FBgn0005779	PpD6	0	0	0	NA	NA	NA	NA
FBgn0008635	betaCop	9208.93	10297.5	7576.09	0.735721	-0.442769	0.0116281	0.0755996
FBgn0008636	hbn	0.772936	0.509351	1.16831	2.29373	1.1977	0.771828	1
FBgn0008646	E5	1570.7	1830.07	1181.64	0.645681	-0.631107	0.0677188	0.259927
FBgn0008651	lbl	29.6618	14.2157	52.8311	3.7164	1.89391	3.74768e-05	0.000680265
FBgn0008654	Su(z)2	1434.97	1910.07	722.321	0.378164	-1.40291	7.41178e-09	2.88624e-07
FBgn0010014	CanB	18.238	18.9316	17.1975	0.908404	-0.138594	0.779582	1
FBgn0010015	CanA1	8.10838	11.2137	3.45041	0.307697	-1.70042	0.29264	0.650451
FBgn0010019	Cyp4g1	0	0	0	NA	NA	NA	NA
FBgn0010038	GstD2	24.9227	20.2641	31.9105	1.57473	0.655108	0.371633	0.743133
FBgn0010039	GstD3	3676.08	3236.56	4335.35	1.33949	0.421686	0.0475523	0.20567
FBgn0010040	GstD4	37.8443	35.2923	41.6724	1.18078	0.239738	0.973515	1
FBgn0010041	GstD5	20.2471	22.2439	17.2521	0.775588	-0.366638	0.705462	0.999636
FBgn0010042	GstD6	7.79974	7.76206	7.85625	1.01213	0.0174	0.88466	1
FBgn0010043	GstD7	4.06997	3.59855	4.77709	1.32751	0.408719	1	1
FBgn0010044	GstD8	0.338982	0.56497	0	0	#NAME?	1	1
FBgn0010051	Itp-r83A	6283.5	6752.6	5579.86	0.826327	-0.275215	0.106556	0.348618
FBgn0010052	Jhe	0	0	0	NA	NA	NA	NA
FBgn0010053	Jheh1	493.098	491.426	495.606	1.00851	0.0122201	0.954282	1
FBgn0010078	RpL23	77197	65421.6	94860.1	1.44998	0.536034	0.00713408	0.0526817
FBgn0010097	gammaTub37C	5.65322	4.04261	8.06914	1.99602	0.997128	0.699214	0.996797
FBgn0010100	Acon	11039.1	11342.4	10584.1	0.933145	-0.0998271	0.390034	0.762189
FBgn0010105	comm	938.177	949.562	921.1	0.970027	-0.0439038	0.900842	1
FBgn0010109	dpn	1351.77	1566.93	1029.03	0.656715	-0.60666	0.0680042	0.260667
FBgn0010113	hdc	23866	25644.2	21198.7	0.826647	-0.274658	0.272693	0.627584
FBgn0010114	hig	21.1297	27.5364	11.5196	0.418339	-1.25726	0.180553	0.486437
FBgn0010173	RpA-70	8058.82	7543.33	8832.07	1.17085	0.227551	0.221874	0.556491
FBgn0010194	Wnt5	4254.98	5085.77	3008.79	0.59161	-0.757281	0.0001308	0.00197852
FBgn0010197	Gyc32E	9.80915	13.6589	4.03457	0.295381	-1.75935	0.344169	0.711386
FBgn0010198	RpS15Aa	37498	32425.2	45107.1	1.39111	0.476238	0.0440337	0.195794
FBgn0010213	Sod2	2752.08	2876.19	2565.91	0.892121	-0.16469	0.362619	0.733977
FBgn0010215	alpha-Cat	11713.3	12937.4	9877.1	0.76345	-0.389394	0.0231798	0.124847
FBgn0010217	ATPsyn-beta	40709.4	41166.4	40023.9	0.972247	-0.0406046	0.677639	0.98222
FBgn0010220	Dbp45A	1480.23	1285.74	1771.96	1.37817	0.462754	0.0171978	0.100542
FBgn0010222	Nmdmc	2409.38	2037.42	2967.32	1.45641	0.542416	0.00665656	0.050042
FBgn0010223	Galpha73B	31.2623	35.6817	24.6332	0.690359	-0.534581	0.529936	0.886693
FBgn0010225	Gel	2659.67	2410.57	3033.32	1.25834	0.331523	0.0541514	0.224878
FBgn0010226	GstS1	21437.6	27869.5	11789.8	0.423036	-1.24115	2.3825e-11	1.4038e-09
FBgn0010228	HmgZ	13627	13490.9	13831.3	1.02523	0.0359508	0.885001	1
FBgn0010235	Klc	4242.06	4207.2	4294.36	1.02072	0.029583	0.855195	1
FBgn0010238	Lac	15569.1	15653.3	15442.8	0.986553	-0.0195323	0.846387	1
FBgn0010240	Lcch3	65.6564	64.4048	67.5337	1.04858	0.0684377	0.883301	1
FBgn0010241	Mdr50	38.6494	48.5976	23.7271	0.488236	-1.03435	0.201885	0.523868
FBgn0010246	Myo61F	3439.49	3593.99	3207.74	0.89253	-0.164028	0.277647	0.632901
FBgn0010247	Parp	7257.57	8199.24	5845.07	0.712879	-0.48827	0.0467774	0.203611
FBgn0010258	Rbp4	91.6223	86.8768	98.7405	1.13656	0.184672	0.988287	1
FBgn0010263	Rbp9	33.7399	32.6627	35.3557	1.08245	0.114298	1	1
FBgn0010265	RpS13	75279.3	67517.1	86922.7	1.28742	0.36448	0.154621	0.443565
FBgn0010269	Dsor1	1263.51	1420.32	1028.28	0.723981	-0.465977	0.0772707	0.282564
FBgn0010278	Ssrp	12731.7	12293.9	13388.4	1.08902	0.123035	0.515027	0.873698
FBgn0010280	Taf4	10093.4	10309.7	9768.94	0.947552	-0.0777226	0.66504	0.972879
FBgn0010282	TfIIFalpha	2976.16	3287.67	2508.89	0.763121	-0.390016	0.0407816	0.185737
FBgn0010287	Trf	765.45	702.63	859.681	1.22352	0.291037	0.157978	0.449354
FBgn0010288	Uch	4154.89	4018.26	4359.83	1.085	0.117701	0.451616	0.820815
FBgn0010292	bys	2762.91	2803.3	2702.32	0.963976	-0.0529314	0.928832	1
FBgn0010294	ng2	0	0	0	NA	NA	NA	NA
FBgn0010295	ng3	0	0	0	NA	NA	NA	NA
FBgn0010296	ng4	0	0	0	NA	NA	NA	NA
FBgn0010300	brat	24029.2	25487.7	21841.4	0.85694	-0.222734	0.175398	0.477727
FBgn0010303	hep	4635.94	4933.5	4189.61	0.849217	-0.235794	0.151359	0.4379
FBgn0010309	pigeon	689.004	704.029	666.465	0.946644	-0.0791061	0.77964	1
FBgn0010313	corto	5866.9	6738.04	4560.2	0.676784	-0.563232	0.00350134	0.0305695
FBgn0010314	Cks30A	4429.85	4563.82	4228.9	0.926614	-0.109959	0.466424	0.832403
FBgn0010315	CycD	2778.12	2850.45	2669.63	0.936564	-0.0945512	0.762247	1
FBgn0010316	dap	4719.16	4486.22	5068.56	1.12981	0.176075	0.413795	0.784834
FBgn0010317	CycJ	5.74165	9.56941	0	0	#NAME?	0.0899208	0.310992
FBgn0010323	Gsc	2.06913	1.53772	2.86626	1.86397	0.898375	0.905194	1
FBgn0010328	woc	21571.7	24648	16957.3	0.687979	-0.539564	0.00142304	0.0151226
FBgn0010329	Tbh	22.9318	29.6192	12.9008	0.435554	-1.19908	0.0373662	0.174924
FBgn0010333	Rac1	5754.01	5770.97	5728.57	0.992654	-0.0106376	0.884297	1
FBgn0010339	128up	3743.73	3865.13	3561.64	0.921482	-0.117972	0.416758	0.787607
FBgn0010340	140up	535.208	510.495	572.278	1.12103	0.164821	0.49749	0.860288
FBgn0010341	Cdc42	11406	11512.2	11246.8	0.976953	-0.0336393	0.861798	1
FBgn0010342	Map60	0	0	0	NA	NA	NA	NA
FBgn0010348	Arf79F	27315.7	29865.7	23490.8	0.786548	-0.346392	0.0433154	0.193058
FBgn0010350	CdsA	1113.43	1159.12	1044.89	0.901449	-0.149682	0.669618	0.97642
FBgn0010352	Nc73EF	6821.53	6243.28	7688.9	1.23155	0.300473	0.176308	0.479267
FBgn0010355	Taf1	7831.35	8975.05	6115.81	0.681423	-0.553378	0.0017588	0.0177361
FBgn0010356	Taf5	1765.39	1792.69	1724.45	0.961937	-0.0559854	0.723959	1
FBgn0010357	betaTry	0.305611	0.509351	0	0	#NAME?	1	1
FBgn0010358	deltaTry	0	0	0	NA	NA	NA	NA
FBgn0010359	gammaTry	0	0	0	NA	NA	NA	NA
FBgn0010379	Akt1	7862.65	8173.07	7397.03	0.905049	-0.143931	0.358225	0.728865
FBgn0010380	Bap	5541.28	5974.55	4891.38	0.818704	-0.288587	0.0808502	0.290792
FBgn0010381	Drs	20.4445	12.6949	32.0689	2.52613	1.33693	0.340129	0.70702
FBgn0010382	CycE	3749.12	3841.48	3610.58	0.939894	-0.0894308	0.541885	0.895897
FBgn0010383	Cyp18a1	600.98	116.985	1326.97	11.3431	3.50375	4.47456e-05	0.000783152
FBgn0010385	Def	0	0	0	NA	NA	NA	NA
FBgn0010387	Dbi	4.85247	3.73441	6.52957	1.74849	0.806108	0.656555	0.969757
FBgn0010388	Dro	10.6318	3.56137	21.2373	5.96325	2.5761	0.0160891	0.0956752
FBgn0010389	htl	1333.8	1349.07	1310.9	0.971707	-0.0414074	0.871276	1
FBgn0010391	Gtp-bp	4081.31	4153.33	3973.3	0.956654	-0.0639308	0.938081	1
FBgn0010395	betaInt-nu	16.0244	13.7174	19.4849	1.42045	0.506349	0.501677	0.863893
FBgn0010397	LamC	0	0	0	NA	NA	NA	NA
FBgn0010398	Lrr47	356.167	367.393	339.327	0.92361	-0.114645	0.948528	1
FBgn0010399	Nmdar1	28.3004	12.3758	52.1872	4.21687	2.07617	0.00617394	0.0470742
FBgn0010401	Os-C	57.4211	87.8074	11.8415	0.134858	-2.89049	0.000993369	0.0114309
FBgn0010403	Os-E	0	0	0	NA	NA	NA	NA
FBgn0010406	RNaseX25	1368.01	1373.44	1359.86	0.99011	-0.0143398	0.996933	1
FBgn0010407	Ror	87.5457	75.5477	105.543	1.39704	0.482368	0.419467	0.790602
FBgn0010408	RpS9	92299.7	73011	121233	1.66048	0.731597	8.2708e-05	0.0013412
FBgn0010409	RpL18A	63231.5	57160.5	72338.1	1.26553	0.339737	0.230769	0.570409
FBgn0010411	RpS18	68964.8	60787.6	81230.5	1.3363	0.418244	0.102266	0.3386
FBgn0010412	RpS19a	51772	45715.3	60856.9	1.33121	0.412742	0.0470755	0.204448
FBgn0010414	SerT	121.088	122.429	119.077	0.972623	-0.0400477	0.769955	1
FBgn0010415	Sdc	16302.8	19002.7	12253.1	0.644809	-0.633057	0.000386484	0.00510503
FBgn0010416	TH1	3180.01	3247.06	3079.42	0.94837	-0.0764786	0.646041	0.96412
FBgn0010417	Taf6	2553.82	2454.93	2702.16	1.10071	0.138429	0.612179	0.944927
FBgn0010421	TfIIFbeta	1114.93	1134.63	1085.38	0.956593	-0.0640233	0.883533	1
FBgn0010422	TfIIS	4171.25	4296.84	3982.86	0.926928	-0.109471	0.593877	0.932873
FBgn0010423	TpnC47D	17.422	16.4033	18.95	1.15526	0.208214	1	1
FBgn0010424	TpnC73F	113.434	153.948	52.6623	0.342078	-1.5476	0.28495	0.640926
FBgn0010425	epsilonTry	0	0	0	NA	NA	NA	NA
FBgn0010431	mtrm	0	0	0	NA	NA	NA	NA
FBgn0010433	ato	18.4192	28.1508	3.82168	0.135757	-2.8809	0.26397	0.617485
FBgn0010434	cora	24928	24144.8	26102.8	1.0811	0.112494	0.945386	1
FBgn0010435	emp	7242.22	7673.47	6595.36	0.859502	-0.218428	0.336577	0.701841
FBgn0010438	mtSSB	1507.55	1336.6	1763.99	1.31976	0.400278	0.046335	0.20264
FBgn0010441	pll	0	0	0	NA	NA	NA	NA
FBgn0010452	trn	5853.37	6985.82	4154.7	0.594733	-0.749686	0.000683948	0.00829434
FBgn0010453	Wnt4	344.286	464.756	163.582	0.351974	-1.50646	2.82983e-10	1.42811e-08
FBgn0010470	Fkbp13	4845.16	6452.3	2434.44	0.377298	-1.40622	0.00124918	0.0137229
FBgn0010473	tutl	5816.74	7208.84	3728.6	0.517226	-0.951134	2.47798e-06	6.01018e-05
FBgn0010482	l(2)01289	32.4718	33.3808	31.1082	0.931921	-0.101721	0.849344	1
FBgn0010488	NAT1	28961.2	33931.9	21505	0.633769	-0.657971	0.00165009	0.0168666
FBgn0010497	dmGlut	602.605	715.306	433.553	0.606108	-0.722352	0.00683231	0.0511242
FBgn0010501	Dcp-1	0	0	0	NA	NA	NA	NA
FBgn0010504	kermit	0	0	0	NA	NA	NA	NA
FBgn0010516	wal	2920.63	2906.22	2942.24	1.01239	0.0177706	0.935131	1
FBgn0010520	Bka	827.774	770.681	913.413	1.1852	0.245132	0.17951	0.484333
FBgn0010531	CCS	536.01	485.556	611.69	1.25977	0.333161	0.118751	0.37418
FBgn0010548	Aldh-III	5461.91	5640.99	5193.3	0.920636	-0.119297	0.586977	0.927917
FBgn0010549	l(2)03659	768.466	445.799	1252.46	2.80948	1.4903	3.88299e-12	2.63248e-10
FBgn0010551	l(2)03709	8870.02	8484.41	9448.44	1.11362	0.155262	0.367062	0.739134
FBgn0010575	sbb	22920.2	25874.2	18489.2	0.714578	-0.484836	0.088892	0.30879
FBgn0010583	dock	2671.67	3030.95	2132.73	0.703651	-0.507068	0.00850575	0.0600148
FBgn0010590	Prosbeta1	4725.1	5064.64	4215.78	0.832395	-0.26466	0.156521	0.446737
FBgn0010591	Sply	1586.02	1624.2	1528.73	0.941221	-0.0873941	0.706185	1
FBgn0010602	lwr	11973.8	12762.2	10791.3	0.845567	-0.242008	0.145219	0.427201
FBgn0010607	l(2)05714	1002.65	896.159	1162.38	1.29707	0.375256	0.0429354	0.191937
FBgn0010611	Hmgs	2196.83	1824.3	2755.62	1.51051	0.595032	0.00293548	0.0264287
FBgn0010612	l(2)06225	5136.2	4905.55	5482.19	1.11755	0.160339	0.661419	0.970692
FBgn0010620	Sip1	17284.9	14880.6	20891.5	1.40395	0.489489	0.0103648	0.0695146
FBgn0010621	Cct5	20169.6	20694.1	19383	0.936645	-0.0944253	0.481503	0.846172
FBgn0010622	l(2)06496	1300.62	1174.45	1489.87	1.26857	0.343199	0.0824582	0.294692
FBgn0010638	Sec61beta	7667.34	8687.47	6137.15	0.706437	-0.501368	0.00721766	0.0531534
FBgn0010651	l(2)08717	1236.43	1698.43	543.437	0.319965	-1.64402	1.46786e-06	3.7374e-05
FBgn0010660	Nup214	8502.73	10195.9	5962.96	0.584839	-0.773889	9.36898e-06	0.000201219
FBgn0010704	l(2)s5379	4954.08	5450.38	4209.64	0.772356	-0.372661	0.0424832	0.191166
FBgn0010709	Atg6	1073	915.081	1309.88	1.43144	0.517465	0.0182044	0.10442
FBgn0010741	l(3)01239	5075.67	4998.51	5191.4	1.03859	0.054624	0.753453	1
FBgn0010747	Srp54k	4645.51	5329.98	3618.81	0.678954	-0.558614	0.00383492	0.0328699
FBgn0010750	atms	3171.3	3174.34	3166.74	0.997607	-0.0034571	0.955148	1
FBgn0010762	simj	6357.86	7322.58	4910.78	0.670635	-0.576401	0.0012991	0.0141452
FBgn0010768	sqz	1894.68	2147.17	1515.96	0.706028	-0.502202	0.0107214	0.0712271
FBgn0010770	ppan	1727.08	1668.15	1815.47	1.08831	0.122089	0.57867	0.920948
FBgn0010772	Xe7	5801.61	6174.85	5241.75	0.848887	-0.236355	0.241159	0.586432
FBgn0010774	Ref1	10742.2	11772.8	9196.38	0.781157	-0.356316	0.0753922	0.278825
FBgn0010786	l(3)02640	1022.74	927.819	1165.11	1.25575	0.328553	0.0992209	0.331842
FBgn0010803	Aats-trp	1994.11	1849.14	2211.56	1.196	0.258214	0.17501	0.477239
FBgn0010808	l(3)03670	2168.62	2047.73	2349.95	1.14759	0.198605	0.332028	0.697073
FBgn0010812	unc-45	2502.86	2750.93	2130.76	0.774559	-0.368553	0.0643764	0.250689
FBgn0010825	Gug	12112.8	13864.9	9484.78	0.684086	-0.547751	0.0016771	0.0170806
FBgn0010830	l(3)04053	1368.89	1563.33	1077.23	0.689059	-0.5373	0.0102656	0.0690161
FBgn0010877	l(3)05822	2825.38	2890.47	2727.76	0.943708	-0.0835874	0.553999	0.903306
FBgn0010894	sinu	7725.31	6734.95	9210.85	1.36762	0.451666	0.0196973	0.110121
FBgn0010905	Spn	1942.62	2234.44	1504.9	0.6735	-0.570249	0.0297968	0.149502
FBgn0010909	msn	14991.1	15857.9	13691	0.863356	-0.211973	0.182918	0.490366
FBgn0010926	l(3)07882	2702.39	2822.19	2522.69	0.893874	-0.161857	0.475199	0.840161
FBgn0011016	SsRbeta	5209.5	5927.35	4132.73	0.697232	-0.520289	0.00643624	0.0487111
FBgn0011020	Sas-4	1543.63	1494.53	1617.27	1.08213	0.113868	0.595648	0.934406
FBgn0011202	dia	5334.48	3850.99	7559.71	1.96305	0.9731	0.00101075	0.0116071
FBgn0011204	cue	0	0	0	NA	NA	NA	NA
FBgn0011205	fbl	2075.13	2011.89	2169.99	1.07859	0.109141	0.518855	0.876623
FBgn0011206	bol	443.135	531.011	311.321	0.586281	-0.770337	0.00212427	0.020556
FBgn0011207	pelo	2164.15	2244.25	2044	0.910773	-0.134836	0.543755	0.896203
FBgn0011211	blw	34419.1	36753.3	30917.9	0.841227	-0.249433	0.077773	0.283714
FBgn0011217	eff	26096.3	29169.7	21486.1	0.73659	-0.441066	0.00690827	0.0515897
FBgn0011224	heph	36853.5	42115.1	28961.2	0.687669	-0.540214	0.0018215	0.018157
FBgn0011225	jar	14521.3	16257.1	11917.7	0.733079	-0.447959	0.0458754	0.201589
FBgn0011227	ox	1438.85	1446.48	1427.4	0.986808	-0.0191588	0.778568	1
FBgn0011230	poe	23182.5	27234.3	17104.7	0.628058	-0.671029	0.0771944	0.282564
FBgn0011232	scat	1305.89	1315.33	1291.72	0.982046	-0.0261374	0.85756	1
FBgn0011236	ken	3816.34	2973.49	5080.62	1.70864	0.772847	0.118715	0.37418
FBgn0011239	ms(2)35Ci	0	0	0	NA	NA	NA	NA
FBgn0011241	cbx	4.94977	5.70184	3.82168	0.670253	-0.577221	0.775894	1
FBgn0011244	Hsp60B	0.186177	0.310295	0	0	#NAME?	1	1
FBgn0011259	Sema-1a	3086.06	3707.28	2154.22	0.581078	-0.783197	0.0112302	0.0735221
FBgn0011260	Sema-2a	23410.7	25801.2	19825	0.768375	-0.380117	0.0293557	0.14775
FBgn0011270	Pglym87	0.372354	0.62059	0	0	#NAME?	1	1
FBgn0011272	RpL13	62292	52793.9	76539.1	1.44977	0.535826	0.00606417	0.0464385
FBgn0011273	And	0	0	0	NA	NA	NA	NA
FBgn0011274	Dif	836.232	252.912	1711.21	6.76603	2.75831	1.38203e-18	2.13061e-16
FBgn0011276	HLH3B	17.6686	22.4413	10.5096	0.468315	-1.09445	0.559659	0.907184
FBgn0011277	HLH4C	0.88926	1.4821	0	0	#NAME?	0.978348	1
FBgn0011278	lbe	0	0	0	NA	NA	NA	NA
FBgn0011279	Pbprp1	0	0	0	NA	NA	NA	NA
FBgn0011280	Pbprp2	2.72729	2.59829	2.92079	1.12412	0.168796	0.831371	1
FBgn0011281	Pbprp3	0.186177	0.310295	0	0	#NAME?	1	1
FBgn0011282	Pbprp4	17.9688	15.4003	21.8215	1.41695	0.502788	0.559568	0.907184
FBgn0011283	Pbprp5	0.233663	0	0.584157	Inf	Inf	0.739032	1
FBgn0011284	RpS4	80147.7	69923	95484.7	1.36557	0.449502	0.0187866	0.10678
FBgn0011286	Rya-r44F	41.8088	53.8961	23.6778	0.439323	-1.18665	0.0915211	0.31434
FBgn0011288	Snap25	896.435	842.585	977.211	1.15978	0.213847	0.410918	0.781954
FBgn0011289	TfIIA-L	3285.42	3325.64	3225.09	0.969763	-0.0442959	0.831024	1
FBgn0011290	Taf12	1562.84	1528.86	1613.8	1.05556	0.0780099	0.615751	0.947452
FBgn0011291	Taf11	839.563	866.777	798.742	0.921508	-0.117932	0.772746	1
FBgn0011293	a10	1.0133	0.662455	1.53958	2.32405	1.21664	0.79103	1
FBgn0011294	a5	0	0	0	NA	NA	NA	NA
FBgn0011296	l(2)efl	66.8225	100.223	16.7224	0.166853	-2.58335	0.187855	0.499214
FBgn0011297	l(2)not	515.604	437.639	632.55	1.44537	0.531439	0.0124623	0.0794623
FBgn0011300	babo	7573.37	7714.85	7361.15	0.954153	-0.0677082	0.64177	0.962997
FBgn0011305	Rsf1	6218.79	7251.93	4669.09	0.643841	-0.635224	0.00114015	0.0127929
FBgn0011327	Uch-L3	5684.58	6463.79	4515.78	0.698628	-0.517404	0.00917523	0.0635434
FBgn0011335	l(3)j2D3	1267.7	1326.54	1179.45	0.889115	-0.169557	0.487495	0.852169
FBgn0011336	OstStt3	11952.5	13804.6	9174.21	0.664576	-0.589494	0.000925351	0.0107582
FBgn0011361	mtacp1	3350.39	3115.94	3702.06	1.1881	0.248659	0.218981	0.551941
FBgn0011455	l(3)neo18	2157.24	2037.36	2337.06	1.1471	0.197996	0.301944	0.661059
FBgn0011474	pr-set7	3888.5	4533.03	2921.7	0.644535	-0.633669	0.00119628	0.0132902
FBgn0011476	l(3)neo43	301.186	224.436	416.311	1.85492	0.89136	0.000426281	0.00556539
FBgn0011481	Ssdp	11649.7	12777.4	9958.21	0.779359	-0.35964	0.03452	0.166162
FBgn0011509	SrpRbeta	1778.92	1780.64	1776.34	0.997583	-0.00349173	0.884919	1
FBgn0011554	etaTry	0.422591	0.704319	0	0	#NAME?	1	1
FBgn0011555	thetaTry	0	0	0	NA	NA	NA	NA
FBgn0011556	zetaTry	0	0	0	NA	NA	NA	NA
FBgn0011559	Acp36DE	0	0	0	NA	NA	NA	NA
FBgn0011566	Bzd	587.187	602.885	563.641	0.934906	-0.0971061	0.925093	1
FBgn0011569	can	1.42853	1.99145	0.584157	0.293332	-1.76939	1	1
FBgn0011570	cpb	5313.68	5602.27	4880.8	0.871219	-0.198893	0.301551	0.661059
FBgn0011571	caz	16370.2	18453.8	13244.8	0.71773	-0.478486	0.00591567	0.0454437
FBgn0011573	Cdc37	5267.1	5359.45	5128.57	0.956922	-0.0635267	0.650543	0.966894
FBgn0011576	Cyp4d2	407.605	387.617	437.588	1.12892	0.174942	0.44477	0.814687
FBgn0011581	Dms	8.85838	8.64201	9.18293	1.06259	0.0875862	0.96265	1
FBgn0011582	DopR	0.41984	0.310295	0.584157	1.88259	0.912716	0.86767	1
FBgn0011584	Trp1	4576.2	4674.66	4428.52	0.947345	-0.0780388	0.75119	1
FBgn0011586	e(r)	3577.85	3460.72	3753.54	1.08461	0.117178	0.483826	0.848461
FBgn0011589	elk	58.9058	83.5959	21.8708	0.261625	-1.93443	0.631366	0.9576
FBgn0011591	fng	10596.8	9379.07	12423.4	1.32459	0.405548	0.034655	0.166599
FBgn0011592	fra	9627.16	11796.2	6373.63	0.540313	-0.888133	0.000678708	0.00825749
FBgn0011596	fzo	0	0	0	NA	NA	NA	NA
FBgn0011603	ine	26.3321	27.5338	24.5294	0.890881	-0.166695	0.984725	1
FBgn0011604	Iswi	13511.7	13988.2	12796.8	0.914831	-0.128423	0.323212	0.686187
FBgn0011606	Klp3A	5528.12	5975.46	4857.1	0.81284	-0.298957	0.0934693	0.318693
FBgn0011638	La	10606.3	10272.3	11107.3	1.08129	0.112755	0.542283	0.896186
FBgn0011640	lark	9316.29	9509.71	9026.15	0.949151	-0.0752901	0.66531	0.972961
FBgn0011642	Zyx	5185.05	5216.07	5138.52	0.985133	-0.0216097	0.995776	1
FBgn0011648	Mad	4454.05	4794.96	3942.69	0.822257	-0.282339	0.128518	0.394314
FBgn0011653	mas	4679.45	5189.56	3914.27	0.754259	-0.406868	0.0758806	0.280171
FBgn0011655	Med	1839.29	2045.44	1530.06	0.748032	-0.418828	0.0393629	0.181091
FBgn0011656	Mef2	2811.9	3153.22	2299.91	0.729385	-0.455248	0.0174736	0.101679
FBgn0011659	Mlh1	1416.9	915.236	2169.4	2.37032	1.24508	7.60532e-10	3.59623e-08
FBgn0011660	Pms2	1755.33	1867.51	1587.05	0.849822	-0.234768	0.325758	0.689761
FBgn0011661	Moe	45980.8	41619	52523.5	1.26201	0.33572	0.0866838	0.303717
FBgn0011666	msi	1236.41	1489.42	856.877	0.575307	-0.797596	0.0100151	0.0678975
FBgn0011668	Mst57Da	0	0	0	NA	NA	NA	NA
FBgn0011669	Mst57Db	0	0	0	NA	NA	NA	NA
FBgn0011670	Mst57Dc	0	0	0	NA	NA	NA	NA
FBgn0011672	Mvl	1652.78	1803.13	1427.25	0.791542	-0.337263	0.0784982	0.285526
FBgn0011674	insc	1777.28	867.429	3142.05	3.62225	1.85689	3.07939e-16	3.57273e-14
FBgn0011676	Nos	98.6695	44.0785	180.556	4.09625	2.0343	9.27239e-09	3.45535e-07
FBgn0011692	pav	8406.19	8163.95	8769.54	1.07418	0.103233	0.774275	1
FBgn0011693	Pdh	16.6787	12.5076	22.9353	1.83371	0.874764	0.355062	0.725059
FBgn0011694	PebII	0	0	0	NA	NA	NA	NA
FBgn0011695	PebIII	46.6514	60.3731	26.069	0.431798	-1.21157	0.0778944	0.283972
FBgn0011701	repo	31.2044	34.0638	26.9153	0.790145	-0.339811	0.638952	0.96159
FBgn0011703	RnrL	10280.8	10044.1	10636	1.05893	0.0826018	0.68112	0.984128
FBgn0011704	RnrS	7294.84	6943.39	7822.01	1.12654	0.171901	0.308288	0.669227
FBgn0011705	rost	741.262	878.766	535.007	0.608816	-0.715922	0.00247243	0.0231102
FBgn0011706	rpr	2028.99	815.436	3849.31	4.72056	2.23896	0.00527755	0.0417245
FBgn0011708	Syx5	2047.42	1896.13	2274.34	1.19946	0.262386	0.155907	0.446005
FBgn0011710	Sep1	8955.02	9283.83	8461.81	0.911457	-0.133754	0.514665	0.873398
FBgn0011715	Snr1	3781.77	3774.83	3792.18	1.00459	0.00661321	0.927168	1
FBgn0011722	Tig	1686	659.595	3225.6	4.89027	2.28991	8.87757e-05	0.00142319
FBgn0011723	byn	0.372354	0.62059	0	0	#NAME?	1	1
FBgn0011725	twin	4861.31	4983.61	4677.85	0.938647	-0.0913461	0.470089	0.835595
FBgn0011726	tsr	35249.6	35852.6	34345.1	0.957951	-0.0619757	0.660577	0.970372
FBgn0011737	wee	1799.92	1736.89	1894.46	1.09072	0.125283	0.579344	0.921026
FBgn0011739	wts	4878.56	4587.08	5315.79	1.15886	0.212709	0.269292	0.623582
FBgn0011740	alpha-Man-II	3803.02	4701.37	2455.5	0.522294	-0.937066	2.18941e-06	5.42724e-05
FBgn0011741	Actr13E	2814.83	2738.48	2929.36	1.06971	0.0972137	0.597235	0.935662
FBgn0011742	Arp14D	6640.69	7517.05	5326.17	0.708545	-0.497069	0.00817237	0.0582648
FBgn0011743	Arp53D	0	0	0	NA	NA	NA	NA
FBgn0011745	Arp87C	4159.57	4298.01	3951.91	0.919476	-0.121117	0.56933	0.914145
FBgn0011746	ana	1248.77	2026.98	81.4496	0.0401827	-4.63728	1.2969e-24	3.64882e-22
FBgn0011747	Ank	18557.9	18522	18611.7	1.00484	0.00696911	1	1
FBgn0011754	PhKgamma	3959.26	4283.27	3473.25	0.810887	-0.302428	0.158866	0.450575
FBgn0011758	B-H1	249.29	370.771	67.069	0.180891	-2.46681	4.84216e-07	1.3522e-05
FBgn0011760	ctp	25843.7	27735.1	23006.7	0.829519	-0.269654	0.0843228	0.298769
FBgn0011761	dhd	2.59979	3.69603	0.955419	0.258499	-1.95177	0.73861	1
FBgn0011762	DNApol-alpha50	881.516	790.3	1018.34	1.28855	0.365746	0.110566	0.357254
FBgn0011763	Dp	9437.79	10066.2	8495.21	0.843936	-0.244795	0.212093	0.541283
FBgn0011764	Dsp1	18433.7	20334.1	15583.1	0.766355	-0.383914	0.0334047	0.162321
FBgn0011766	E2f	11942.1	12424.9	11218	0.902866	-0.147416	0.378422	0.749966
FBgn0011768	Fdh	7222.38	7947.55	6134.63	0.771889	-0.373534	0.0416092	0.188164
FBgn0011769	Fdxh	304.631	218.032	434.529	1.99296	0.994913	0.000156864	0.00231978
FBgn0011770	Gip	941.54	1024.96	816.409	0.796527	-0.328205	0.188081	0.499283
FBgn0011771	Hem	4066.86	4384.03	3591.11	0.819135	-0.287828	0.0897949	0.310843
FBgn0011774	Irbp	739.947	530.356	1054.33	1.98797	0.991295	9.91847e-07	2.60192e-05
FBgn0011785	BRWD3	9606.83	10481.4	8294.98	0.7914	-0.337521	0.0591708	0.237994
FBgn0011787	mRpL12	1688.87	1656.58	1737.31	1.04874	0.0686511	0.778882	1
FBgn0011802	Gem3	1281.29	1193.28	1413.31	1.18439	0.244145	0.261559	0.613759
FBgn0011812	Lcp1Psi	1.77577	2.57018	0.584157	0.227283	-2.13744	0.837073	1
FBgn0011817	nmo	5232.26	7193.85	2289.88	0.31831	-1.65149	2.58644e-05	0.000490857
FBgn0011818	oaf	2334.31	2221.68	2503.25	1.12674	0.172154	0.555057	0.904077
FBgn0011822	pcl	0	0	0	NA	NA	NA	NA
FBgn0011823	Pen	24501.9	26943	20840.3	0.773496	-0.370535	0.0262487	0.136697
FBgn0011824	CG4038	0	0	0	NA	NA	NA	NA
FBgn0011826	Pp2B-14D	3434.64	3606.78	3176.44	0.880687	-0.183299	0.258573	0.609299
FBgn0011828	Pxn	889.164	657.672	1236.4	1.87997	0.910708	0.118014	0.372859
FBgn0011829	Ret	325.018	63.9051	716.687	11.2149	3.48734	5.71767e-14	4.89211e-12
FBgn0011832	Ser12	0	0	0	NA	NA	NA	NA
FBgn0011834	Ser6	0.211296	0.35216	0	0	#NAME?	1	1
FBgn0011836	Taf2	3474.65	3732.94	3087.22	0.827021	-0.274005	0.141985	0.420609
FBgn0011837	Tis11	5940.55	5776.81	6186.15	1.07086	0.0987691	0.718799	1
FBgn0011840	tRNA:A:90C	0	0	0	NA	NA	NA	NA
FBgn0011844	tRNA:D2:69F	0	0	0	NA	NA	NA	NA
FBgn0011845	tRNA:D:96A	0	0	0	NA	NA	NA	NA
FBgn0011848	tRNA:E4:56Fa	0.382168	0	0.955419	Inf	Inf	0.766778	1
FBgn0011849	tRNA:E4:56Fb	0	0	0	NA	NA	NA	NA
FBgn0011850	tRNA:E4:56Fc	0	0	0	NA	NA	NA	NA
FBgn0011851	tRNA:E4:62Aa	0	0	0	NA	NA	NA	NA
FBgn0011852	tRNA:E4:62Ab	0	0	0	NA	NA	NA	NA
FBgn0011853	tRNA:E4:62Ac	0	0	0	NA	NA	NA	NA
FBgn0011854	tRNA:E4:62Ad	0	0	0	NA	NA	NA	NA
FBgn0011855	tRNA:E4:62Ae	0	0	0	NA	NA	NA	NA
FBgn0011858	tRNA:F2:89BC	0	0	0	NA	NA	NA	NA
FBgn0011859	tRNA:G3:22BCa	0	0	0	NA	NA	NA	NA
FBgn0011860	tRNA:G3:22BCb	0.568345	0.310295	0.955419	3.07907	1.62249	0.830241	1
FBgn0011861	tRNA:G3:28D	0	0	0	NA	NA	NA	NA
FBgn0011862	tRNA:G3:35Ba	0	0	0	NA	NA	NA	NA
FBgn0011863	tRNA:G3:35Bb	0	0	0	NA	NA	NA	NA
FBgn0011864	tRNA:G3:35Bc	0	0	0	NA	NA	NA	NA
FBgn0011865	tRNA:G3:35Bd	0	0	0	NA	NA	NA	NA
FBgn0011866	tRNA:G3:35Be	0	0	0	NA	NA	NA	NA
FBgn0011867	tRNA:G3:53E	0	0	0	NA	NA	NA	NA
FBgn0011868	tRNA:G3:55E	0.422591	0.704319	0	0	#NAME?	1	1
FBgn0011869	tRNA:G3:56EFa	0	0	0	NA	NA	NA	NA
FBgn0011870	tRNA:G3:56EFb	0	0	0	NA	NA	NA	NA
FBgn0011871	tRNA:G3:57BCa	0	0	0	NA	NA	NA	NA
FBgn0011872	tRNA:G3:57BCb	0.186177	0.310295	0	0	#NAME?	1	1
FBgn0011877	tRNA:HPsi	1.85142	3.08571	0	0	#NAME?	0.799237	1
FBgn0011878	tRNA:H:48F	0.305611	0.509351	0	0	#NAME?	1	1
FBgn0011879	tRNA:H:56E	0	0	0	NA	NA	NA	NA
FBgn0011880	tRNA:I:42A	0	0	0	NA	NA	NA	NA
FBgn0011881	tRNA:I:49Fa	0	0	0	NA	NA	NA	NA
FBgn0011882	tRNA:I:49Fb	0	0	0	NA	NA	NA	NA
FBgn0011883	tRNA:I:49Fc	0	0	0	NA	NA	NA	NA
FBgn0011884	tRNA:I:49Fd	0	0	0	NA	NA	NA	NA
FBgn0011885	tRNA:I:49Fe	0	0	0	NA	NA	NA	NA
FBgn0011887	tRNA:K2:42Aa	0	0	0	NA	NA	NA	NA
FBgn0011888	tRNA:K2:42Ab	0	0	0	NA	NA	NA	NA
FBgn0011889	tRNA:K2:42Ac	0	0	0	NA	NA	NA	NA
FBgn0011890	tRNA:K2:42Ad	0	0	0	NA	NA	NA	NA
FBgn0011891	tRNA:K2:42Ae	0	0	0	NA	NA	NA	NA
FBgn0011892	tRNA:K2:42Ea	0	0	0	NA	NA	NA	NA
FBgn0011893	tRNA:K2:42Eb	0	0	0	NA	NA	NA	NA
FBgn0011894	tRNA:K2:42Ec	0	0	0	NA	NA	NA	NA
FBgn0011895	tRNA:K2:42Ed	0	0	0	NA	NA	NA	NA
FBgn0011896	tRNA:K2:50C	0	0	0	NA	NA	NA	NA
FBgn0011897	tRNA:K2:56EF	0	0	0	NA	NA	NA	NA
FBgn0011902	tRNA:K5:29A	0	0	0	NA	NA	NA	NA
FBgn0011904	tRNA:K5:84ABa	0	0	0	NA	NA	NA	NA
FBgn0011905	tRNA:K5:87BC	0	0	0	NA	NA	NA	NA
FBgn0011906	tRNA:L2:44EF	0	0	0	NA	NA	NA	NA
FBgn0011909	tRNA:L3:49Fa	0	0	0	NA	NA	NA	NA
FBgn0011910	tRNA:L3:49Fb	0	0	0	NA	NA	NA	NA
FBgn0011915	tRNA:M2:48Ba	0	0	0	NA	NA	NA	NA
FBgn0011916	tRNA:M2:48Bb	0	0	0	NA	NA	NA	NA
FBgn0011919	tRNA:M2:83F	0	0	0	NA	NA	NA	NA
FBgn0011921	tRNA:M3:46A	0	0	0	NA	NA	NA	NA
FBgn0011927	tRNA:M3:70Fa	0	0	0	NA	NA	NA	NA
FBgn0011928	tRNA:M3:70Fb	0	0	0	NA	NA	NA	NA
FBgn0011931	tRNA:N5:42Aa	0	0	0	NA	NA	NA	NA
FBgn0011932	tRNA:N5:42Ab	0	0	0	NA	NA	NA	NA
FBgn0011933	tRNA:N5:42Ac	0	0	0	NA	NA	NA	NA
FBgn0011934	tRNA:N5:42Ad	0	0	0	NA	NA	NA	NA
FBgn0011935	tRNA:N5:42Ae	0	0	0	NA	NA	NA	NA
FBgn0011936	tRNA:N5:42Af	0	0	0	NA	NA	NA	NA
FBgn0011937	tRNA:N5:42Ag	0	0	0	NA	NA	NA	NA
FBgn0011938	tRNA:N5:42Ah	0	0	0	NA	NA	NA	NA
FBgn0011944	tRNA:P:90Ca	0	0	0	NA	NA	NA	NA
FBgn0011945	tRNA:P:90Cb	0	0	0	NA	NA	NA	NA
FBgn0011948	tRNA:R:12Ea	0	0	0	NA	NA	NA	NA
FBgn0011949	tRNA:R:12Eb	0	0	0	NA	NA	NA	NA
FBgn0011950	tRNA:R:12Ec	0	0	0	NA	NA	NA	NA
FBgn0011951	tRNA:R:12Ed	0	0	0	NA	NA	NA	NA
FBgn0011952	tRNA:R:12Ee	0	0	0	NA	NA	NA	NA
FBgn0011953	tRNA:R:12Ef	0	0	0	NA	NA	NA	NA
FBgn0011954	tRNA:R:19F	0	0	0	NA	NA	NA	NA
FBgn0011955	tRNA:R2:42Aa	0	0	0	NA	NA	NA	NA
FBgn0011956	tRNA:R2:42Ab	0	0	0	NA	NA	NA	NA
FBgn0011957	tRNA:R2:42Ac	0	0	0	NA	NA	NA	NA
FBgn0011958	tRNA:R2:42Ad	0	0	0	NA	NA	NA	NA
FBgn0011959	tRNA:R2:84Fa	0.386468	0.254675	0.584157	2.29373	1.1977	0.808097	1
FBgn0011960	tRNA:R2:84Fb	0	0	0	NA	NA	NA	NA
FBgn0011961	tRNA:R2:84Fc	0	0	0	NA	NA	NA	NA
FBgn0011962	tRNA:R2:84Fd	0.534973	0.254675	0.955419	3.75152	1.90747	0.826351	1
FBgn0011963	tRNA:R2:84Fe	0.382168	0	0.955419	Inf	Inf	0.745639	1
FBgn0011965	tRNA:R:83AB	0	0	0	NA	NA	NA	NA
FBgn0011966	tRNA:R:85Ca	0	0	0	NA	NA	NA	NA
FBgn0011970	tRNA:S2b:86A	0	0	0	NA	NA	NA	NA
FBgn0011971	tRNA:S2b:88A	0	0	0	NA	NA	NA	NA
FBgn0011974	tRNA:S474:12Eh	0	0	0	NA	NA	NA	NA
FBgn0011975	tRNA:S4:12Ea	0	0	0	NA	NA	NA	NA
FBgn0011976	tRNA:S4:12Eb	0	0	0	NA	NA	NA	NA
FBgn0011977	tRNA:S4:12Ee	0	0	0	NA	NA	NA	NA
FBgn0011980	tRNA:S774:12Ec	0	0	0	NA	NA	NA	NA
FBgn0011981	tRNA:S774:12Ef	0	0	0	NA	NA	NA	NA
FBgn0011982	tRNA:S7:12Ed	0.305611	0.509351	0	0	#NAME?	1	1
FBgn0011983	tRNA:S7:12Eg	0	0	0	NA	NA	NA	NA
FBgn0011984	tRNA:S7:23Ea	0	0	0	NA	NA	NA	NA
FBgn0011985	tRNA:S7:23Eb	3.08674	2.45485	4.03457	1.64351	0.71678	0.816986	1
FBgn0011986	tRNA:S7:64D	0	0	0	NA	NA	NA	NA
FBgn0011987	tRNA:SeC	2.54286	2.9642	1.91084	0.644638	-0.633438	0.984918	1
FBgn0011993	tRNA:T:90Ca	0	0	0	NA	NA	NA	NA
FBgn0011994	tRNA:T:90Cb	0	0	0	NA	NA	NA	NA
FBgn0011998	tRNA:V3b:84Da	0	0	0	NA	NA	NA	NA
FBgn0011999	tRNA:V3b:84Db	0	0	0	NA	NA	NA	NA
FBgn0012000	tRNA:V3b:84Dc	0	0	0	NA	NA	NA	NA
FBgn0012001	tRNA:V3b:84Dd	0	0	0	NA	NA	NA	NA
FBgn0012002	tRNA:V3b:90BC	0	0	0	NA	NA	NA	NA
FBgn0012003	tRNA:V3b:92Ba	0	0	0	NA	NA	NA	NA
FBgn0012004	tRNA:V3b:92Bb	0.186177	0.310295	0	0	#NAME?	1	1
FBgn0012009	tRNA:V4:70BCa	0	0	0	NA	NA	NA	NA
FBgn0012010	tRNA:V4:70BCb	0	0	0	NA	NA	NA	NA
FBgn0012011	tRNA:V4:89BC	0	0	0	NA	NA	NA	NA
FBgn0012016	tRNA:Y1:22Fa	0	0	0	NA	NA	NA	NA
FBgn0012017	tRNA:Y1:22Fb	2.49723	1.86177	3.45041	1.8533	0.890094	0.816851	1
FBgn0012018	tRNA:Y1:28C	0	0	0	NA	NA	NA	NA
FBgn0012024	tRNA:Y1:85Aa	0	0	0	NA	NA	NA	NA
FBgn0012025	tRNA:Y1:85Ab	0	0	0	NA	NA	NA	NA
FBgn0012026	tRNA:Y1:85Ac	0	0	0	NA	NA	NA	NA
FBgn0012027	tRNA:Y1:85Ad	0	0	0	NA	NA	NA	NA
FBgn0012028	tRNA:Y1:85Ae	0	0	0	NA	NA	NA	NA
FBgn0012034	AcCoAS	2117.49	257.258	4907.83	19.0774	4.2538	3.41043e-93	1.91905e-89
FBgn0012036	Aldh	0	0	0	NA	NA	NA	NA
FBgn0012037	Ance	16064.9	21932.2	7264.03	0.331203	-1.59421	0.000488964	0.006239
FBgn0012042	AttA	7.3425	4.23758	11.9999	2.83178	1.50171	0.235809	0.57829
FBgn0012051	CalpA	4219.64	2886.12	6219.91	2.15511	1.10776	1.28603e-06	3.2968e-05
FBgn0012058	Cdc27	2649.62	2750.33	2498.54	0.90845	-0.138522	0.45204	0.821187
FBgn0012344	Dh44	0.831427	0.606835	1.16831	1.92526	0.945052	0.740392	1
FBgn0013263	Trl	21.4104	18.8361	25.2719	1.34167	0.424033	0.65494	0.969668
FBgn0013269	FK506-bp1	16148.1	16844.6	15103.4	0.896631	-0.157414	0.421116	0.792457
FBgn0013272	Gp150	48777.6	47057.2	51358.2	1.0914	0.126179	0.761068	1
FBgn0013275	Hsp70Aa	2.36894	2.0374	2.86626	1.40682	0.492436	1	1
FBgn0013276	Hsp70Ab	2699.07	2612.28	2829.25	1.08306	0.11511	0.98935	1
FBgn0013277	Hsp70Ba	760.646	14.8365	1879.36	126.672	6.98495	4.03248e-05	0.000721487
FBgn0013278	Hsp70Bb	2854.43	2398.32	3538.6	1.47545	0.561154	0.825642	1
FBgn0013279	Hsp70Bc	885.922	798.321	1017.32	1.27433	0.349735	0.895811	1
FBgn0013300	Mst35Ba	0	0	0	NA	NA	NA	NA
FBgn0013301	Mst35Bb	0	0	0	NA	NA	NA	NA
FBgn0013303	Nca	1843.84	1916.86	1734.3	0.904761	-0.144392	0.644062	0.963592
FBgn0013305	Nmda1	3001.26	2581.23	3631.3	1.40681	0.492428	0.005771	0.0445452
FBgn0013307	Odc1	3.58139	1.57958	6.58409	4.16824	2.05944	0.291767	0.649821
FBgn0013308	Odc2	0	0	0	NA	NA	NA	NA
FBgn0013323	Ptth	12.1852	3.10764	25.8015	8.30262	3.05357	0.0289504	0.146066
FBgn0013325	RpL11	54895	46836.8	66982.3	1.43012	0.516138	0.00613034	0.0468369
FBgn0013334	Sap47	3822.98	3763.02	3912.92	1.03983	0.0563532	0.983652	1
FBgn0013342	n-syb	16.2762	21.1106	9.02456	0.427489	-1.22604	0.162308	0.456539
FBgn0013343	Syx1A	0	0	0	NA	NA	NA	NA
FBgn0013347	TfIIA-S	3386.87	3627.79	3025.5	0.833978	-0.261918	0.174414	0.47619
FBgn0013348	TpnC41C	1.815	2.24613	1.16831	0.520146	-0.943011	1	1
FBgn0013432	bcn92	697.003	652.26	764.118	1.17149	0.228349	0.238331	0.581565
FBgn0013433	beat-Ia	0.899074	0.86151	0.955419	1.109	0.149265	1	1
FBgn0013435	cdc2rk	723.74	761.93	666.455	0.874693	-0.193151	0.381493	0.752951
FBgn0013442	fos28F	0	0	0	NA	NA	NA	NA
FBgn0013467	igl	8.34239	13.5145	0.584157	0.0432243	-4.53201	0.117612	0.372322
FBgn0013469	klu	3345.62	4819.86	1134.26	0.23533	-2.08724	9.50946e-11	5.09617e-09
FBgn0013531	MED20	713.182	723.049	698.381	0.965884	-0.0500789	0.919579	1
FBgn0013548	l(2)dtl	1373.61	1344.56	1417.19	1.05402	0.0758958	0.639242	0.961769
FBgn0013563	pex1	562.998	585.681	528.973	0.903176	-0.146921	0.734222	1
FBgn0013576	l(3)82Fd	7189.36	7477.84	6756.64	0.903555	-0.146315	0.475796	0.840508
FBgn0013672	mt:ATPase6	1918.73	1621.62	2364.4	1.45805	0.544038	0.347925	0.715821
FBgn0013673	mt:ATPase8	0	0	0	NA	NA	NA	NA
FBgn0013674	mt:CoI	72941.9	66835.7	82101.1	1.2284	0.296782	0.677228	0.982155
FBgn0013675	mt:CoII	10789.7	9291.82	13036.4	1.403	0.488516	0.399006	0.771681
FBgn0013676	mt:CoIII	31124	26220.7	38478.9	1.4675	0.553362	0.374231	0.746075
FBgn0013678	mt:Cyt-b	1464.83	1127.74	1970.46	1.74727	0.805099	0.211747	0.540853
FBgn0013679	mt:ND1	2640.76	2398.4	3004.32	1.25264	0.324968	0.463953	0.830398
FBgn0013680	mt:ND2	440.495	361.727	558.646	1.54438	0.627031	0.506363	0.868254
FBgn0013681	mt:ND3	0.186177	0.310295	0	0	#NAME?	1	1
FBgn0013683	mt:ND4L	0	0	0	NA	NA	NA	NA
FBgn0013684	mt:ND5	1379.66	1216.26	1624.76	1.33587	0.417783	0.559892	0.907184
FBgn0013685	mt:ND6	42.4274	26.924	65.6826	2.43955	1.28662	0.402249	0.775019
FBgn0013686	mt:lrRNA	2609.55	2319.96	3043.93	1.31206	0.391836	0.613025	0.945585
FBgn0013687	mt:ori	4.85008	2.17266	8.86619	4.08079	2.02885	0.493438	0.857509
FBgn0013688	mt:srRNA	0	0	0	NA	NA	NA	NA
FBgn0013689	mt:tRNA:A	1.30361	0.509351	2.49499	4.89838	2.2923	0.580968	0.922695
FBgn0013690	mt:tRNA:C	0	0	0	NA	NA	NA	NA
FBgn0013691	mt:tRNA:D	0	0	0	NA	NA	NA	NA
FBgn0013692	mt:tRNA:E	0	0	0	NA	NA	NA	NA
FBgn0013693	mt:tRNA:F	0	0	0	NA	NA	NA	NA
FBgn0013694	mt:tRNA:G	0	0	0	NA	NA	NA	NA
FBgn0013695	mt:tRNA:H	0	0	0	NA	NA	NA	NA
FBgn0013696	mt:tRNA:I	0	0	0	NA	NA	NA	NA
FBgn0013697	mt:tRNA:K	0	0	0	NA	NA	NA	NA
FBgn0013698	mt:tRNA:L:CUN	0	0	0	NA	NA	NA	NA
FBgn0013699	mt:tRNA:L:UUR	0	0	0	NA	NA	NA	NA
FBgn0013700	mt:tRNA:M	0	0	0	NA	NA	NA	NA
FBgn0013701	mt:tRNA:N	0	0	0	NA	NA	NA	NA
FBgn0013702	mt:tRNA:P	0	0	0	NA	NA	NA	NA
FBgn0013703	mt:tRNA:Q	0	0	0	NA	NA	NA	NA
FBgn0013704	mt:tRNA:R	0	0	0	NA	NA	NA	NA
FBgn0013705	mt:tRNA:S:AGY	0	0	0	NA	NA	NA	NA
FBgn0013706	mt:tRNA:S:UCN	0	0	0	NA	NA	NA	NA
FBgn0013707	mt:tRNA:T	0	0	0	NA	NA	NA	NA
FBgn0013708	mt:tRNA:V	0	0	0	NA	NA	NA	NA
FBgn0013709	mt:tRNA:W	0	0	0	NA	NA	NA	NA
FBgn0013710	mt:tRNA:Y	0	0	0	NA	NA	NA	NA
FBgn0013717	not	2180.25	2733.13	1350.93	0.494278	-1.0166	7.65688e-07	2.05168e-05
FBgn0013718	nuf	8511.29	7908.93	9414.83	1.1904	0.251451	0.189607	0.501591
FBgn0013720	pck	6556.77	6017.27	7366.02	1.22415	0.291775	0.0914358	0.314204
FBgn0013725	phyl	74.8573	103.063	32.5492	0.315819	-1.66283	0.199034	0.519224
FBgn0013726	pnut	13190.2	13097.6	13329.1	1.01768	0.0252774	1	1
FBgn0013732	sced	1152.08	1211.84	1062.45	0.876723	-0.189808	0.476885	0.841729
FBgn0013733	shot	34328	30852.8	39540.8	1.28159	0.35794	0.755404	1
FBgn0013746	alien	4033.11	4133.99	3881.77	0.938988	-0.0908207	0.680695	0.983761
FBgn0013749	Arf102F	3691.01	3689.04	3693.97	1.00133	0.00192447	0.933518	1
FBgn0013750	Arf51F	3606.89	3297.9	4070.37	1.23423	0.303611	0.0786257	0.285713
FBgn0013751	Awh	179.127	151.062	221.224	1.46446	0.550365	0.475312	0.840161
FBgn0013753	Bgb	2400.72	2582.42	2128.17	0.824099	-0.27911	0.197426	0.516104
FBgn0013755	Bro	3.52948	4.21914	2.49499	0.591352	-0.757911	0.89524	1
FBgn0013756	Mtor	15967.5	18864.5	11621.9	0.616071	-0.69883	0.0018179	0.0181532
FBgn0013759	CASK	3580.68	3917.06	3076.11	0.785311	-0.348664	0.0748464	0.278086
FBgn0013762	Cdk5	757.366	724.079	807.296	1.11493	0.156952	0.311793	0.67311
FBgn0013763	CG5210	0	0	0	NA	NA	NA	NA
FBgn0013764	Chi	3060.99	3095.28	3009.54	0.972301	-0.0405253	0.926405	1
FBgn0013765	cnn	4650.83	4213.95	5306.16	1.25919	0.332492	0.11653	0.370577
FBgn0013767	Crz	3.07572	3.71038	2.12373	0.572375	-0.804966	0.996985	1
FBgn0013770	Cp1	8745.73	7465.75	10665.7	1.42861	0.514617	0.00550477	0.0429582
FBgn0013771	Cyp6a9	16.1153	7.21553	29.4648	4.08353	2.02982	0.0426537	0.191721
FBgn0013772	Cyp6a8	3.24043	5.01127	0.584157	0.116569	-3.10075	0.636224	0.959923
FBgn0013773	Cyp6a22	3.19241	3.51542	2.70789	0.77029	-0.376526	1	1
FBgn0013799	Deaf1	2264.53	2527.39	1870.25	0.739995	-0.434413	0.0256305	0.134538
FBgn0013809	Dhc16F	14.9502	15.0063	14.8661	0.990659	-0.0135397	1	1
FBgn0013810	Dhc36C	7.7743	10.6569	3.45041	0.323773	-1.62695	0.317768	0.678332
FBgn0013811	Dhc62B	167.234	217.137	92.3798	0.425445	-1.23295	0.00131271	0.0142306
FBgn0013812	Dhc93AB	112.482	175.471	17.9998	0.10258	-3.28518	3.11425e-09	1.29327e-07
FBgn0013813	Dhc98D	5.13719	7.14616	2.12373	0.297185	-1.75057	0.552202	0.902066
FBgn0013948	Eip93F	64.5058	53.3295	81.2703	1.52393	0.607795	0.777001	1
FBgn0013949	Ela	11.1181	6.38831	18.2127	2.85094	1.51144	0.166145	0.462551
FBgn0013953	Esp	31.7409	38.4957	21.6086	0.561324	-0.833094	0.334605	0.699445
FBgn0013954	FK506-bp2	14243.9	14191.3	14322.7	1.00926	0.0133043	0.994938	1
FBgn0013955	PR2	9924.36	10644.2	8844.63	0.830936	-0.267191	0.11004	0.356065
FBgn0013972	Gycalpha99B	1.65634	2.37112	0.584157	0.246363	-2.02114	0.948825	1
FBgn0013973	Gycbeta100B	3.14025	5.23375	0	0	#NAME?	0.432962	0.803919
FBgn0013981	His4r	30860.4	29816.3	32426.6	1.08755	0.12108	0.448193	0.81797
FBgn0013983	imd	417.458	356.84	508.385	1.42469	0.510644	0.0977707	0.328648
FBgn0013984	InR	6879.52	6806.02	6989.75	1.02699	0.038429	0.803882	1
FBgn0013987	MAPk-Ak2	6283.88	6305.27	6251.78	0.991517	-0.012291	0.871348	1
FBgn0013988	Strn-Mlck	772.546	807.232	720.517	0.892577	-0.163951	0.895318	1
FBgn0013995	Calx	19.249	26.3128	8.6533	0.328863	-1.60444	0.147472	0.431976
FBgn0013997	Nrx-IV	21539.1	21391.9	21760	1.01721	0.0246186	0.887207	1
FBgn0013998	Nsf2	2965.01	2874.11	3101.35	1.07906	0.10978	0.609322	0.943397
FBgn0014000	Hf	3.92281	3.81196	4.0891	1.0727	0.101252	0.820908	1
FBgn0014001	Pak	4407.51	4425.53	4380.47	0.989819	-0.0147636	0.847253	1
FBgn0014002	Pdi	38624.2	48359.7	24020.9	0.496713	-1.00952	1.29043e-07	3.90389e-06
FBgn0014006	Pk92B	4535.67	4922.49	3955.44	0.803544	-0.315551	0.0695393	0.265017
FBgn0014007	Ptp69D	4464.2	4974.17	3699.25	0.743692	-0.427224	0.0276702	0.141595
FBgn0014009	Rab2	3140.23	2852.27	3572.17	1.2524	0.324691	0.0768602	0.282213
FBgn0014010	Rab5	7689.38	7688.08	7691.34	1.00042	0.000612675	0.983336	1
FBgn0014011	Rac2	0	0	0	NA	NA	NA	NA
FBgn0014018	Rel	0	0	0	NA	NA	NA	NA
FBgn0014019	Rh5	14.7619	15.6825	13.3811	0.853249	-0.228962	1	1
FBgn0014020	Rho1	25386.2	22217.1	30139.8	1.3566	0.439998	0.0216367	0.118376
FBgn0014022	Rlb1	572.825	538.402	624.46	1.15984	0.213927	0.38981	0.762083
FBgn0014023	Rlc1	1121.04	1086.02	1173.55	1.08059	0.111825	0.523694	0.881213
FBgn0014024	Rnp4F	3640.1	4025.62	3061.82	0.760584	-0.394821	0.0339364	0.164126
FBgn0014026	RpL7A	94464.9	83641.2	110701	1.32352	0.404377	0.0408901	0.186006
FBgn0014028	SdhB	2759.14	2566.43	3048.22	1.18773	0.248206	0.172599	0.473222
FBgn0014029	Sep2	5468.73	5025.68	6133.3	1.22039	0.287345	0.118969	0.374617
FBgn0014031	Spat	25.2005	32.2684	14.5987	0.452415	-1.14428	0.098438	0.329949
FBgn0014032	Sptr	881.57	951.951	775.998	0.815166	-0.294834	0.218755	0.551662
FBgn0014033	Sr-CI	233.125	162.585	338.935	2.08466	1.05981	0.0936503	0.318957
FBgn0014037	Su(Tpl)	0	0	0	NA	NA	NA	NA
FBgn0014073	Tie	1324.23	1209.37	1496.52	1.23744	0.307357	0.337811	0.703892
FBgn0014075	Ugt	7405.3	8753.38	5383.19	0.614984	-0.70138	8.48877e-05	0.00137259
FBgn0014076	Vm32E	0	0	0	NA	NA	NA	NA
FBgn0014092	CG4278	1288.77	1251.16	1345.18	1.07514	0.104528	0.656693	0.969757
FBgn0014127	barr	5054.96	4952.34	5208.88	1.0518	0.072863	0.851369	1
FBgn0014133	bif	11190.7	12861.2	8684.89	0.675279	-0.566444	0.00182841	0.0181775
FBgn0014135	bnl	418.148	335.305	542.411	1.61766	0.693911	0.407226	0.779437
FBgn0014141	cher	38671	20569.1	65824	3.20015	1.67814	0.00308448	0.0275936
FBgn0014143	croc	0.305611	0.509351	0	0	#NAME?	1	1
FBgn0014163	fax	76843.7	92153.2	53879.4	0.584672	-0.7743	2.21694e-05	0.000431651
FBgn0014179	gcm	11.5485	15.4257	5.73251	0.37162	-1.4281	0.0419998	0.189445
FBgn0014184	Oda	28494.5	26230	31891.4	1.21584	0.28195	0.278844	0.634172
FBgn0014189	Hel25E	17350.5	18278.4	15958.7	0.873091	-0.195796	0.284695	0.640926
FBgn0014269	prod	2251.79	2250.08	2254.35	1.0019	0.00273427	0.947088	1
FBgn0014340	mof	2075.01	1676.94	2672.12	1.59345	0.672152	0.00142649	0.015145
FBgn0014342	mia	713.287	685.926	754.33	1.09973	0.137144	0.51658	0.874643
FBgn0014343	mirr	6526.77	6991.96	5828.99	0.833671	-0.26245	0.234209	0.576381
FBgn0014366	noi	3238.2	3468.57	2892.65	0.83396	-0.26195	0.170304	0.469294
FBgn0014368	nol	0	0	0	NA	NA	NA	NA
FBgn0014380	RhoL	979.687	868.347	1146.7	1.32055	0.401139	0.098456	0.329949
FBgn0014388	sty	9160.94	6486.86	13172	2.03057	1.02189	8.74327e-05	0.00140567
FBgn0014391	sun	3666.11	3380.8	4094.07	1.21098	0.276171	0.170954	0.470512
FBgn0014395	tilB	92.9632	104.999	74.9096	0.713432	-0.487153	0.560948	0.907672
FBgn0014396	tim	4.2819	5.33123	2.70789	0.507929	-0.9773	0.718145	1
FBgn0014411	Vps26	2900.36	3227.14	2410.2	0.746852	-0.421105	0.045996	0.201835
FBgn0014417	CG13397	250.345	308.091	163.725	0.531416	-0.912085	0.00157416	0.0162719
FBgn0014427	CG11899	3560.15	5272.06	992.282	0.188215	-2.40955	5.06704e-15	4.95865e-13
FBgn0014454	Acp1	0	0	0	NA	NA	NA	NA
FBgn0014455	Ahcy13	3814.83	3659.7	4047.54	1.10598	0.145322	0.465568	0.831798
FBgn0014464	Cp7Fa	0	0	0	NA	NA	NA	NA
FBgn0014465	Cp7Fb	0	0	0	NA	NA	NA	NA
FBgn0014466	Cp7Fc	0	0	0	NA	NA	NA	NA
FBgn0014467	CrebB-17A	3690.38	3212.09	4407.82	1.37226	0.456552	0.0109206	0.0723368
FBgn0014469	Cyp4e2	668.78	959.826	232.211	0.241931	-2.04733	0.00014768	0.0021955
FBgn0014848	Eig71Eh	0	0	0	NA	NA	NA	NA
FBgn0014849	Eig71Ei	0	0	0	NA	NA	NA	NA
FBgn0014850	Eig71Ej	0	0	0	NA	NA	NA	NA
FBgn0014851	Eig71Ek	0	0	0	NA	NA	NA	NA
FBgn0014857	His3.3A	7907.69	8092.99	7629.74	0.942759	-0.0850387	0.691388	0.990564
FBgn0014859	Hr38	33.4899	35.8167	29.9997	0.837589	-0.255686	0.95726	1
FBgn0014861	Mcm2	6205.46	6064.61	6416.75	1.05807	0.0814284	0.742534	1
FBgn0014863	Mlp84B	0	0	0	NA	NA	NA	NA
FBgn0014865	Mtk	0.806308	0.56497	1.16831	2.06792	1.04818	0.770115	1
FBgn0014868	Ost48	7981.6	9017.58	6427.64	0.71279	-0.488452	0.01017	0.0685345
FBgn0014869	Pglym78	1855.43	2207.43	1327.43	0.601349	-0.733725	0.0020867	0.0202446
FBgn0014870	Psi	11943.7	13718.9	9280.92	0.676505	-0.563828	0.0015169	0.0158506
FBgn0014877	Roe1	1058.25	936.047	1241.55	1.32638	0.40749	0.0558097	0.229227
FBgn0014879	Set	11599.6	12804.8	9791.7	0.76469	-0.387054	0.0340486	0.164456
FBgn0014903	CG14630	0	0	0	NA	NA	NA	NA
FBgn0014906	Hydr2	2867.01	2306.55	3707.72	1.60747	0.684796	0.0046987	0.038559
FBgn0014930	CG2846	783.125	696.306	913.353	1.31171	0.39145	0.0608066	0.241808
FBgn0014931	CG2678	28.9148	34.3533	20.757	0.604223	-0.726848	0.250107	0.597687
FBgn0014949	btn	17.3735	20.923	12.0492	0.575881	-0.796157	0.367953	0.739586
FBgn0015000	betaggt-I	1117.53	997.692	1297.29	1.30029	0.378834	0.0348186	0.167028
FBgn0015001	iotaTry	19.2427	21.4543	15.9254	0.742293	-0.42994	0.59977	0.937343
FBgn0015008	Actn3	0.152805	0.254675	0	0	#NAME?	1	1
FBgn0015010	Ag5r	52.9769	73.041	22.8807	0.313259	-1.67457	0.0393753	0.181091
FBgn0015011	Ahcy89E	88.4047	71.0218	114.479	1.61189	0.688751	0.267493	0.621077
FBgn0015014	tgo	3239.9	3773.92	2438.87	0.646241	-0.629855	0.000639592	0.00783591
FBgn0015019	Cctgamma	16453.1	17031.7	15585.2	0.91507	-0.128045	0.33872	0.705112
FBgn0015024	CkIalpha	14996.3	17152.6	11761.7	0.685708	-0.544334	0.00443917	0.0368697
FBgn0015025	CkIIalpha-i1	201.03	196.089	208.443	1.063	0.0881435	0.660498	0.970372
FBgn0015031	cype	2375.59	2266.47	2539.29	1.12037	0.163977	0.499864	0.862208
FBgn0015032	Cyp4c3	0	0	0	NA	NA	NA	NA
FBgn0015033	Cyp4d8	6.1573	8.70441	2.33663	0.268442	-1.89732	0.545023	0.896617
FBgn0015034	Cyp4e1	23.0082	28.1523	15.2919	0.543185	-0.880485	0.307816	0.668887
FBgn0015035	Cyp4e3	4.51328	2.84887	7.00988	2.46058	1.299	0.410206	0.781547
FBgn0015036	Cyp4ae1	275.797	283.677	263.976	0.930553	-0.10384	0.767607	1
FBgn0015037	Cyp4p1	0	0	0	NA	NA	NA	NA
FBgn0015038	Cyp9b1	2.12576	3.54293	0	0	#NAME?	0.275368	0.630644
FBgn0015039	Cyp9b2	7.0364	9.14319	3.8762	0.423944	-1.23805	0.644906	0.963592
FBgn0015040	Cyp9c1	0	0	0	NA	NA	NA	NA
FBgn0015075	Ddx1	1998.06	2337.18	1489.39	0.63726	-0.650047	0.00158067	0.0163051
FBgn0015129	DopR2	3.62785	4.8781	1.75247	0.359253	-1.47693	0.821056	1
FBgn0015218	eIF-4E	15137.4	15074	15232.3	1.0105	0.0150719	0.966504	1
FBgn0015221	Fer2LCH	6596.15	5187.58	8709	1.67882	0.747446	4.83993e-05	0.000839269
FBgn0015222	Fer1HCH	8839.81	6963.66	11654	1.67355	0.742913	4.37518e-05	0.000771759
FBgn0015229	glec	1693.21	1845.07	1465.42	0.794235	-0.332362	0.0805552	0.290102
FBgn0015230	Glut3	0	0	0	NA	NA	NA	NA
FBgn0015239	Hr78	4722.67	5696.35	3262.14	0.572671	-0.804221	7.11629e-05	0.00117429
FBgn0015240	Hr96	610.699	595.421	633.615	1.06415	0.0896959	0.55151	0.901393
FBgn0015245	Hsp60	18521.6	17181.8	20531.4	1.19495	0.256955	0.184227	0.492468
FBgn0015247	Iap2	2270.05	1902.75	2820.99	1.48259	0.568115	0.00236907	0.022367
FBgn0015268	Nap1	31480.6	25363	40657.1	1.60301	0.680782	0.000135146	0.00203879
FBgn0015269	Nf1	4134.18	3747.64	4713.99	1.25786	0.330966	0.188254	0.499554
FBgn0015270	Orc2	1295.46	1155.22	1505.81	1.30348	0.382371	0.046089	0.202059
FBgn0015271	Orc5	804.262	817.755	784.023	0.958751	-0.0607713	0.93267	1
FBgn0015277	Pi3K59F	984.922	873.895	1151.46	1.31762	0.397936	0.0526	0.220223
FBgn0015278	Pi3K68D	4804.58	5151.37	4284.39	0.8317	-0.265865	0.118217	0.373083
FBgn0015279	Pi3K92E	5250.32	5191.91	5337.93	1.02812	0.0400144	0.889711	1
FBgn0015282	Pros26.4	7671.27	8452.66	6499.18	0.768891	-0.379149	0.0450064	0.19894
FBgn0015283	Pros54	4979.12	5520.56	4166.97	0.754809	-0.405816	0.024348	0.12967
FBgn0015286	Rala	3928.3	3396.01	4726.74	1.39185	0.477003	0.0304294	0.151662
FBgn0015288	RpL22	37585.1	34596	42068.8	1.216	0.282146	0.592842	0.932775
FBgn0015295	shark	2180.14	2402.85	1846.07	0.768281	-0.380294	0.0659094	0.254847
FBgn0015296	Shc	2467.23	2119.14	2989.35	1.41064	0.496352	0.00569122	0.0440502
FBgn0015298	Srp19	1439.57	1395.93	1505.02	1.07815	0.108554	0.512795	0.872
FBgn0015299	Ssb-c31a	2187.5	1941.79	2556.06	1.31634	0.396535	0.0804837	0.289937
FBgn0015300	Ssl	0	0	0	NA	NA	NA	NA
FBgn0015316	Try29F	86.4901	82.9496	91.8008	1.10671	0.146273	0.542831	0.896186
FBgn0015320	UbcD2	5225.65	5313.7	5093.58	0.958574	-0.0610376	0.665355	0.972961
FBgn0015321	UbcD4	3115.67	3150.92	3062.79	0.972033	-0.0409228	0.710081	1
FBgn0015323	VAChT	0	0	0	NA	NA	NA	NA
FBgn0015324	Vha26	7904.17	7132.25	9062.05	1.27057	0.345481	0.0781969	0.284614
FBgn0015331	abs	1739.83	1818.48	1621.85	0.891871	-0.165094	0.410345	0.781547
FBgn0015336	CG15865	0	0	0	NA	NA	NA	NA
FBgn0015338	CG5861	1583.89	1497.81	1713.01	1.14368	0.193679	0.203716	0.527404
FBgn0015351	CG14906	0	0	0	NA	NA	NA	NA
FBgn0015359	CG2034	1184.84	1108.77	1298.94	1.17152	0.228379	0.274116	0.629316
FBgn0015360	oxt	576.387	656.21	456.652	0.695893	-0.523064	0.0493023	0.210329
FBgn0015371	chn	11063.8	8792.59	14470.5	1.64577	0.718759	0.00368873	0.0318351
FBgn0015372	chrw	605.576	524.369	727.386	1.38717	0.47214	0.0190915	0.107914
FBgn0015374	crl	2279.52	2287.54	2267.49	0.991235	-0.0127006	0.946024	1
FBgn0015376	cutlet	1426.77	1323.07	1582.33	1.19595	0.258157	0.246012	0.59313
FBgn0015379	dod	2134.99	2345.53	1819.19	0.775599	-0.366618	0.0625038	0.246118
FBgn0015380	drl	12749.1	11657.7	14386.1	1.23405	0.303397	0.129203	0.395875
FBgn0015381	dsf	0	0	0	NA	NA	NA	NA
FBgn0015391	glu	7778.78	7845.75	7678.32	0.978661	-0.0311192	0.668091	0.975493
FBgn0015393	hoip	5429.11	5103.25	5917.88	1.15963	0.213664	0.262106	0.614529
FBgn0015396	jumu	9333.55	9254.02	9452.86	1.02149	0.030672	0.820638	1
FBgn0015399	kek1	6206.06	7690.04	3980.08	0.517564	-0.950192	4.99544e-06	0.000114498
FBgn0015400	kek2	45.7407	59.8452	24.5839	0.410792	-1.28352	0.0389873	0.180116
FBgn0015402	ksr	0	0	0	NA	NA	NA	NA
FBgn0015477	Rme-8	6598.68	7067.23	5895.84	0.834251	-0.261446	0.0860359	0.302351
FBgn0015509	lin19	8921.54	9830.88	7557.53	0.768754	-0.379406	0.0456811	0.200897
FBgn0015513	mbc	5649.16	5814.58	5401.03	0.928877	-0.106441	0.522672	0.880299
FBgn0015519	nAcRalpha-7E	368.128	554.373	88.7606	0.16011	-2.64287	3.90229e-09	1.60279e-07
FBgn0015520	nonA-l	998.501	1204.88	688.936	0.571789	-0.806445	0.00279402	0.02544
FBgn0015521	RpS21	43583.6	37659.7	52469.3	1.39325	0.478451	0.053134	0.221413
FBgn0015522	olf186-M	0	0	0	NA	NA	NA	NA
FBgn0015524	otp	0.802007	0.310295	1.53958	4.96165	2.31082	0.564758	0.910942
FBgn0015527	pen	5351.64	5084.31	5752.64	1.13145	0.178172	0.360374	0.731144
FBgn0015541	sda	11620.4	8106.05	16891.9	2.08386	1.05926	0.00266287	0.024584
FBgn0015542	sima	11580.4	13361.7	8908.53	0.666724	-0.584839	0.00235028	0.0222166
FBgn0015543	snoRNA:Me28S-A1322	0	0	0	NA	NA	NA	NA
FBgn0015544	spag	1170.71	1100.46	1276.08	1.15959	0.213614	0.283697	0.640082
FBgn0015546	spel1	3117.91	2974.93	3332.38	1.12016	0.1637	0.424093	0.79584
FBgn0015550	tap	6.05493	7.01239	4.61873	0.658652	-0.602411	0.842384	1
FBgn0015553	tos	0	0	0	NA	NA	NA	NA
FBgn0015558	tty	111.02	141.318	65.5735	0.464015	-1.10776	0.0301717	0.150577
FBgn0015561	unpg	29.0914	17.2683	46.826	2.71168	1.43918	0.00513778	0.0411828
FBgn0015562	veg	405.161	295.398	569.804	1.92894	0.947805	0.000165981	0.00243325
FBgn0015565	yin	101.135	112.252	84.4586	0.752401	-0.410427	0.163636	0.458556
FBgn0015568	alpha-Est1	3.3777	1.52396	6.1583	4.04097	2.0147	0.301427	0.661059
FBgn0015569	alpha-Est10	138.932	115.678	173.814	1.50256	0.587424	0.192528	0.506595
FBgn0015570	alpha-Est2	13.8725	14.0254	13.6433	0.972757	-0.0398486	0.952869	1
FBgn0015571	alpha-Est3	440.622	331.155	604.822	1.8264	0.869006	0.000386945	0.00510513
FBgn0015572	alpha-Est4	42.2839	34.1569	54.4745	1.59483	0.673405	0.196702	0.514768
FBgn0015574	alpha-Est6	1.40617	2.34361	0	0	#NAME?	0.813124	1
FBgn0015575	alpha-Est7	15.0885	9.46784	23.5194	2.48414	1.31275	0.214693	0.545038
FBgn0015576	alpha-Est8	14.4796	12.1692	17.9453	1.47465	0.560371	0.493521	0.857509
FBgn0015577	alpha-Est9	65.9072	23.0614	130.176	5.64475	2.49691	0.0118037	0.0763883
FBgn0015582	dare	456.405	418.363	513.468	1.22733	0.295521	0.144934	0.426763
FBgn0015583	Acp29AB	0.372354	0.62059	0	0	#NAME?	1	1
FBgn0015584	Acp53Ea	0.372354	0.62059	0	0	#NAME?	1	1
FBgn0015585	Acp63F	0	0	0	NA	NA	NA	NA
FBgn0015586	Acp76A	1.17866	1.18556	1.16831	0.985453	-0.0211411	0.895835	1
FBgn0015589	Apc	3716.78	3698.58	3744.09	1.01231	0.0176466	0.752301	1
FBgn0015591	Ast	66.0318	39.9058	105.221	2.63673	1.39875	0.0454699	0.200438
FBgn0015600	toc	5218.24	5475.81	4831.88	0.882406	-0.180486	0.317231	0.677699
FBgn0015602	BEAF-32	3679.37	3759.81	3558.71	0.946513	-0.0793057	0.702318	0.997637
FBgn0015609	CadN	2705.93	3165.96	2015.88	0.636736	-0.651234	0.0966787	0.325907
FBgn0015614	CanB2	3294.96	3028.93	3694.01	1.21958	0.286381	0.0691851	0.264114
FBgn0015615	Cap	4707.45	5115.8	4094.93	0.800447	-0.321122	0.0749489	0.278191
FBgn0015618	Cdk8	801.859	880.653	683.668	0.776319	-0.365279	0.120584	0.377165
FBgn0015621	Clp	936.079	942.49	926.462	0.982993	-0.0247462	1	1
FBgn0015622	Cnx99A	6687.19	7677.86	5201.17	0.677424	-0.561868	0.00242416	0.0227726
FBgn0015623	Cpr	3793.13	4090.21	3347.51	0.818421	-0.289084	0.180962	0.487042
FBgn0015625	CycB3	3201.7	3471.74	2796.64	0.805543	-0.311967	0.139266	0.415509
FBgn0015663	Dot	211.194	164.748	280.862	1.7048	0.7696	0.072381	0.271978
FBgn0015664	Dref	6477.52	6680.16	6173.54	0.924161	-0.113784	0.475895	0.840508
FBgn0015714	Cyp6a17	322.59	449.964	131.529	0.29231	-1.77443	0.00528725	0.0417245
FBgn0015721	king-tubby	9.54725	14.8857	1.53958	0.103427	-3.27332	0.062525	0.246118
FBgn0015737	Hmu	8547.37	9499.18	7119.65	0.749502	-0.415995	0.0127714	0.0806341
FBgn0015754	Lis-1	6612.79	6784.09	6355.84	0.936874	-0.0940723	0.650534	0.966894
FBgn0015756	RpL9	72714.2	61485.3	89557.4	1.45657	0.54257	0.0288477	0.145846
FBgn0015765	Mpk2	554.244	420.505	754.852	1.79511	0.844071	0.00320359	0.0284555
FBgn0015766	Msr-110	22967.6	19986.9	27438.6	1.37283	0.457151	0.050316	0.213373
FBgn0015770	MstProx	0.458416	0.764026	0	0	#NAME?	1	1
FBgn0015772	Nak	2531.19	2529.11	2534.3	1.00205	0.00295475	1	1
FBgn0015773	NetA	561.361	858.468	115.702	0.134777	-2.89135	5.58493e-09	2.21313e-07
FBgn0015774	NetB	3562.67	4346.61	2386.75	0.549106	-0.864844	0.00533128	0.0419275
FBgn0015776	nrv1	3658.57	3655.01	3663.91	1.00244	0.00350971	0.855974	1
FBgn0015777	nrv2	10111.4	8642.72	12314.4	1.42483	0.510788	0.00886916	0.0618423
FBgn0015778	rin	40681.2	43120.1	37022.9	0.858599	-0.219943	0.113512	0.363949
FBgn0015781	P5cr	825.939	910.099	699.697	0.768814	-0.379294	0.0875711	0.305874
FBgn0015789	Rab10	3464.29	2902.13	4307.53	1.48427	0.569752	0.00216506	0.0208788
FBgn0015790	Rab11	11103.7	11512.3	10490.8	0.911269	-0.134051	0.438775	0.809422
FBgn0015791	Rab14	1465.19	1340.66	1651.98	1.23221	0.301251	0.116235	0.370046
FBgn0015793	Rab-RP3	700.376	603.258	846.053	1.40247	0.487972	0.0184785	0.105525
FBgn0015794	Rab-RP4	941.772	813.383	1134.36	1.39462	0.479867	0.0102965	0.0691801
FBgn0015795	Rab7	5593.06	5357.4	5946.55	1.10997	0.15052	0.405151	0.778349
FBgn0015797	Rab6	2939.41	3117.62	2672.09	0.857092	-0.222477	0.285634	0.641622
FBgn0015799	Rbf	4716.33	5018.79	4262.64	0.849336	-0.235593	0.187948	0.499214
FBgn0015801	Reg-5	2049.27	1362.25	3079.79	2.2608	1.17683	2.44889e-05	0.000470304
FBgn0015803	rtGEF	2149.52	2214.83	2051.55	0.92628	-0.11048	0.620815	0.951554
FBgn0015805	Rpd3	13935.2	15190.6	12052.2	0.793399	-0.333882	0.0579119	0.234608
FBgn0015806	S6k	6651.97	5358.01	8592.92	1.60375	0.68145	0.000315388	0.00426608
FBgn0015808	ScpX	1938.18	1969.02	1891.92	0.960844	-0.0576257	0.894991	1
FBgn0015816	Slh	1846.91	1887.29	1786.33	0.946506	-0.0793159	0.709535	1
FBgn0015818	Spx	2440.04	2501.76	2347.46	0.938326	-0.0918394	0.679542	0.982977
FBgn0015828	TfIIEalpha	1393.01	1370.62	1426.6	1.04084	0.0577539	0.709809	1
FBgn0015829	TfIIEbeta	880.614	844.772	934.378	1.10607	0.145444	0.470243	0.835595
FBgn0015831	Rtnl2	5.72887	5.05314	6.74246	1.33431	0.416096	0.830225	1
FBgn0015834	Trip1	13786	12014.2	16443.8	1.3687	0.452805	0.0128819	0.0812174
FBgn0015838	Vang	7422.28	7730.32	6960.22	0.90038	-0.151395	0.391562	0.763981
FBgn0015872	Drip	2581.03	1858.77	3664.41	1.97141	0.979231	4.87766e-06	0.000112256
FBgn0015903	apt	3905.52	1487.51	7532.55	5.06388	2.34024	3.78502e-13	2.9377e-11
FBgn0015904	ara	5375.08	5657.77	4951.04	0.875085	-0.192504	0.732033	1
FBgn0015905	ast	1325.49	1327.47	1322.51	0.996259	-0.00540673	0.815702	1
FBgn0015907	bl	14087.3	14763.5	13073	0.885492	-0.175448	0.236511	0.579191
FBgn0015919	caup	5635.36	5785.22	5410.58	0.935241	-0.09659	0.96888	1
FBgn0015924	crq	1012.68	1029.71	987.136	0.958657	-0.060913	0.894499	1
FBgn0015925	csul	2004.43	1926.62	2121.15	1.10097	0.138772	0.552804	0.902678
FBgn0015926	dah	1371.26	1338.91	1419.79	1.0604	0.0846117	0.612886	0.9455
FBgn0015929	dpa	7953.04	8076.06	7768.51	0.961919	-0.0560125	0.653889	0.968687
FBgn0015946	grim	0.758822	0.875265	0.584157	0.667406	-0.583364	1	1
FBgn0015949	hrg	10524.9	11023.3	9777.45	0.886984	-0.17302	0.257875	0.609029
FBgn0016013	Faa	59.3584	57.5516	62.0686	1.07848	0.109006	0.733926	1
FBgn0016031	lama	791.75	908.975	615.913	0.677591	-0.561514	0.159818	0.452481
FBgn0016032	lbm	82.6889	66.809	106.509	1.59422	0.672854	0.0344616	0.166075
FBgn0016034	mael	88.545	92.1104	83.1968	0.903229	-0.146835	0.75221	1
FBgn0016036	mei-P22	17.4452	16.0162	19.5887	1.22305	0.290487	0.917122	1
FBgn0016038	mod(r)	1890.83	1878.33	1909.57	1.01663	0.0237944	0.8656	1
FBgn0016041	Tom40	4015.7	3872.97	4229.8	1.09213	0.12715	0.602042	0.938159
FBgn0016047	nompA	2.01614	2.72328	0.955419	0.350834	-1.51114	0.85597	1
FBgn0016053	pgc	43.1597	47.7618	36.2566	0.759112	-0.397614	0.614601	0.946329
FBgn0016054	phr6-4	636.037	477.143	874.378	1.83253	0.873836	9.80931e-05	0.00155048
FBgn0016059	Sema-1b	12469.3	15079.5	8554.02	0.56726	-0.817918	2.14924e-05	0.000421386
FBgn0016061	side	316.349	390.16	205.631	0.527042	-0.924011	0.0194311	0.109175
FBgn0016070	smg	1983.9	2199.51	1660.48	0.754933	-0.40558	0.0390866	0.180427
FBgn0016075	vkg	2856.54	3056.63	2556.4	0.836344	-0.257831	0.614902	0.946663
FBgn0016076	vri	3754.29	3503.7	4130.19	1.17881	0.23733	0.567279	0.91266
FBgn0016078	wun	2837.8	1562.9	4750.15	3.03932	1.60375	3.90503e-11	2.18839e-09
FBgn0016080	xmas-1	138.451	104.681	189.106	1.80649	0.85319	0.0345721	0.166271
FBgn0016081	fry	6228.22	6635.56	5617.21	0.846531	-0.240365	0.225133	0.560788
FBgn0016119	ATPsyn-Cf6	4198.98	4132.51	4298.68	1.04021	0.0568775	0.880718	1
FBgn0016120	ATPsyn-d	5193.47	5409.52	4869.39	0.900152	-0.15176	0.410146	0.781547
FBgn0016122	Acer	94.3693	110.382	70.3506	0.637339	-0.649867	0.222499	0.556941
FBgn0016123	Aph-4	30.685	46.6467	6.74246	0.144543	-2.79043	0.383593	0.755373
FBgn0016126	CaMKI	6499.72	6023.15	7214.57	1.19781	0.260396	0.178177	0.482649
FBgn0016131	Cdk4	3155.61	3504.01	2633	0.751425	-0.412299	0.0418031	0.188709
FBgn0016641	PTP-ER	1627.22	1727.52	1476.75	0.854839	-0.226276	0.268917	0.623098
FBgn0016650	Lgr1	1.18141	1.57958	0.584157	0.369817	-1.43512	1	1
FBgn0016660	H15	14.6518	18.5089	8.86619	0.479024	-1.06183	0.38475	0.756724
FBgn0016672	Ipp	737.132	702.104	789.673	1.12472	0.16957	0.320109	0.682289
FBgn0016675	Lectin-galC1	0	0	0	NA	NA	NA	NA
FBgn0016684	NaPi-T	96.1216	105.273	82.3946	0.782676	-0.353513	0.268312	0.6226
FBgn0016685	Nlp	24146	26008	21353.1	0.82102	-0.284511	0.100117	0.334038
FBgn0016687	Nurf-38	9256.47	9878.17	8323.91	0.842657	-0.246982	0.193179	0.507953
FBgn0016691	Oscp	5421.38	5426.82	5413.23	0.997496	-0.00361691	0.900504	1
FBgn0016693	Past1	3838	4029.06	3551.41	0.881449	-0.18205	0.464779	0.831049
FBgn0016694	Pdp1	2931.78	1660.42	4838.83	2.91422	1.54311	0.00122412	0.0135242
FBgn0016696	Pitslre	7277.88	7435.63	7041.26	0.946963	-0.0786204	0.673739	0.978997
FBgn0016697	Prosalpha5	5094.19	5553.73	4404.87	0.793137	-0.334358	0.0636399	0.249087
FBgn0016698	Ptpa	1034.34	1011.25	1068.97	1.05709	0.0800939	0.578191	0.920788
FBgn0016700	Rab1	8382.3	8319.49	8476.51	1.01887	0.0269742	0.884339	1
FBgn0016701	Rab4	2226.59	2077.68	2449.95	1.17918	0.237782	0.180051	0.485341
FBgn0016715	Reg-2	213.965	105.167	377.162	3.58633	1.84251	2.2986e-05	0.000444474
FBgn0016726	RpL29	38618.9	32141.5	48335	1.50382	0.588631	0.23675	0.579347
FBgn0016754	sba	2295.56	2368.56	2186.07	0.922954	-0.11567	0.425974	0.797673
FBgn0016756	Ubp64E	10924.4	11440.2	10150.8	0.887294	-0.172516	0.236019	0.578557
FBgn0016762	angel	0	0	0	NA	NA	NA	NA
FBgn0016792	dmt	2981.39	2931.61	3056.06	1.04245	0.0599828	0.840485	1
FBgn0016794	dos	2532.88	2609.44	2418.04	0.926652	-0.109901	0.609022	0.943289
FBgn0016797	fz2	27870.8	25781.5	31004.8	1.2026	0.266152	0.213324	0.543279
FBgn0016917	Stat92E	10658.3	10905.7	10287.1	0.943278	-0.0842457	0.523674	0.881213
FBgn0016919	nompB	1.76165	2.93609	0	0	#NAME?	0.64437	0.963592
FBgn0016920	nompC	1.64259	1.07432	2.49499	2.32239	1.21561	0.801361	1
FBgn0016926	Pino	2423.06	2606.46	2147.97	0.824093	-0.279121	0.283951	0.640222
FBgn0016930	smi35A	4922.32	6656.45	2321.13	0.348705	-1.51992	4.47134e-05	0.000783152
FBgn0016970	l(2)k10201	370.435	271.541	518.775	1.91049	0.93394	0.000127291	0.00193847
FBgn0016974	swaPsi	1.05032	1.75053	0	0	#NAME?	0.529149	0.885959
FBgn0016975	stnB	0	0	0	NA	NA	NA	NA
FBgn0016976	stnA	0	0	0	NA	NA	NA	NA
FBgn0016977	spen	32578.3	38816.1	23221.6	0.598245	-0.741191	0.0676589	0.259786
FBgn0016978	snRNP-U1-70K	3853.65	4007.59	3622.73	0.903967	-0.145658	0.3737	0.745677
FBgn0016983	smid	11556.3	11944.6	10973.7	0.918717	-0.122308	0.430228	0.802173
FBgn0016984	sktl	0	0	0	NA	NA	NA	NA
FBgn0017397	how	7493.76	8383.08	6159.77	0.734786	-0.444605	0.0196259	0.10993
FBgn0017414	cag	426.834	448.607	394.173	0.87866	-0.186623	0.735992	1
FBgn0017418	ari-1	2910.15	2843.76	3009.73	1.05836	0.0818315	0.821868	1
FBgn0017429	CG5989	799.591	642.345	1035.46	1.612	0.688851	0.00137304	0.0147534
FBgn0017430	Nelf-E	852.533	864.174	835.071	0.966322	-0.0494238	0.755576	1
FBgn0017448	CG2187	4.38722	5.8962	2.12373	0.360186	-1.47318	0.493505	0.857509
FBgn0017456	Ubc84D	0	0	0	NA	NA	NA	NA
FBgn0017457	U2af38	3589.35	3753.87	3342.56	0.890431	-0.167425	0.375825	0.7474
FBgn0017482	T3dh	31.1698	40.0589	17.8362	0.44525	-1.16731	0.0885185	0.30794
FBgn0017545	RpS3A	106980	94572.5	125591	1.32799	0.409243	0.0643036	0.250619
FBgn0017549	Ric	614.272	535.595	732.288	1.36724	0.45127	0.0273426	0.140421
FBgn0017550	Rga	4881.73	5363.46	4159.13	0.775456	-0.366883	0.0448793	0.198644
FBgn0017551	Rca1	1491.74	1245.07	1861.75	1.4953	0.580434	0.00317398	0.0282824
FBgn0017556	Pros28.1B	0	0	0	NA	NA	NA	NA
FBgn0017557	Pros28.1A	0	0	0	NA	NA	NA	NA
FBgn0017558	Pdk	1262.46	1264.55	1259.31	0.995855	-0.00599187	0.810995	1
FBgn0017561	Ork1	1.20312	2.00521	0	0	#NAME?	0.559046	0.906949
FBgn0017566	ND75	4389.04	4250.47	4596.89	1.0815	0.113037	0.629052	0.955616
FBgn0017567	ND23	1504.34	1405.7	1652.3	1.17543	0.233189	0.199543	0.519828
FBgn0017572	Mo25	5101.67	5540.18	4443.89	0.802119	-0.318111	0.0704273	0.266865
FBgn0017577	Mcm5	6891.9	6536.51	7424.98	1.13592	0.183866	0.37188	0.743496
FBgn0017578	Max	1776.76	1563.21	2097.08	1.34152	0.423871	0.0342487	0.16521
FBgn0017579	RpL14	48245.4	42342.8	57099.3	1.3485	0.431355	0.0712399	0.269309
FBgn0017581	Lk6	31583	29771.8	34299.7	1.15209	0.20425	0.501737	0.863893
FBgn0017590	klg	5.60943	4.85408	6.74246	1.38903	0.474077	0.784917	1
FBgn0019624	CoVa	4573.27	4406.45	4823.51	1.09465	0.130467	0.600592	0.937455
FBgn0019637	Atu	4016.05	4137.61	3833.72	0.926556	-0.11005	0.589749	0.930339
FBgn0019643	Dat	18.5569	19.1066	17.7324	0.928075	-0.107686	0.965035	1
FBgn0019644	ATPsyn-b	6753.05	6524.59	7095.73	1.08754	0.121064	0.491992	0.856439
FBgn0019650	toy	1.69127	1.7924	1.53958	0.858949	-0.219356	1	1
FBgn0019660	roX2	1977.28	561.862	4100.41	7.29788	2.86748	5.72982e-12	3.77096e-10
FBgn0019661	roX1	48265.6	17205.6	94855.4	5.51305	2.46285	1.44748e-07	4.35559e-06
FBgn0019662	qm	1300.98	1286.59	1322.57	1.02797	0.0397948	0.854648	1
FBgn0019686	lok	3287.48	2812.4	4000.09	1.4223	0.508228	0.0040166	0.0339894
FBgn0019809	gcm2	0.152805	0.254675	0	0	#NAME?	1	1
FBgn0019828	dj	1.58529	2.00521	0.955419	0.476469	-1.06955	1	1
FBgn0019830	colt	2095.53	2381.1	1667.16	0.700165	-0.514233	0.015786	0.0946487
FBgn0019886	Letm1	2960.84	3090.08	2766.98	0.895439	-0.159333	0.38087	0.752644
FBgn0019890	Smg5	8071.47	8482.92	7454.31	0.878743	-0.186487	0.228787	0.567005
FBgn0019925	Surf4	5446.04	5766.74	4965.01	0.860973	-0.215959	0.219554	0.552765
FBgn0019928	Ser8	0	0	0	NA	NA	NA	NA
FBgn0019929	Ser7	0	0	0	NA	NA	NA	NA
FBgn0019932	SamDC	996.354	1006.49	981.154	0.974831	-0.0367762	0.942333	1
FBgn0019936	RpS20	47358	39561.4	59052.9	1.49269	0.577912	0.016406	0.0973291
FBgn0019938	RpI1	6355.66	6551.16	6062.41	0.925394	-0.11186	0.360248	0.731068
FBgn0019940	Rh6	1.46962	0.254675	3.29205	12.9264	3.69225	0.428752	0.800592
FBgn0019947	Psn	4198.02	4367.03	3944.49	0.903242	-0.146815	0.480502	0.845329
FBgn0019948	Phm	2760.07	2704.94	2842.76	1.05095	0.0716964	0.567705	0.91266
FBgn0019949	Cdk9	976.112	1045.89	871.447	0.833211	-0.263246	0.215324	0.546146
FBgn0019952	Orct	370.218	417.868	298.743	0.714921	-0.484145	0.0485336	0.208313
FBgn0019957	ND42	3165.01	3127.01	3222.01	1.03038	0.0431794	0.774465	1
FBgn0019960	CG6455	5731.72	5724.6	5742.4	1.00311	0.00448033	0.866962	1
FBgn0019968	Khc-73	7225.86	7620.51	6633.88	0.87053	-0.200035	0.207563	0.534469
FBgn0019972	Ice	2903.68	3124.8	2572	0.823091	-0.280876	0.169024	0.467139
FBgn0019982	Gs1l	553.943	484.228	658.516	1.35993	0.44353	0.0362131	0.171308
FBgn0019985	mGluRA	18.5531	25.6843	7.85625	0.305877	-1.70898	0.0662386	0.255553
FBgn0019990	Gcn2	2774.58	2994.77	2444.31	0.816193	-0.293018	0.147622	0.432076
FBgn0020018	Ppox	882.522	807.035	995.753	1.23384	0.303156	0.141075	0.418575
FBgn0020224	Cbl	2788.41	3035.9	2417.16	0.796192	-0.328812	0.0800142	0.288816
FBgn0020235	ATPsyn-gamma	8512.3	8552.56	8451.9	0.98823	-0.0170807	0.853099	1
FBgn0020236	ATPCL	8070.14	9041.28	6613.44	0.731471	-0.451127	0.00794392	0.0570647
FBgn0020238	14-3-3epsilon	80896	84152.4	76011.3	0.903257	-0.146791	0.310196	0.671374
FBgn0020240	Mcr	22616.8	22750.9	22415.8	0.985273	-0.0214053	0.613625	0.946121
FBgn0020245	ttv	2704.97	2635.36	2809.37	1.06603	0.0922464	0.768738	1
FBgn0020248	stet	24.3854	28.1146	18.7916	0.668396	-0.581226	0.451275	0.820593
FBgn0020249	stck	3320.92	2774.69	4140.26	1.49215	0.577395	0.00111659	0.0125787
FBgn0020251	sfl	2222.16	1934.74	2653.29	1.37139	0.455643	0.0486336	0.208583
FBgn0020255	ran	33460.6	34073.6	32541.3	0.95503	-0.0663814	0.625533	0.953397
FBgn0020257	ppa	16476.6	14189.7	19907	1.40291	0.488427	0.0191319	0.108043
FBgn0020258	ppk	53.6798	69.1134	30.5293	0.441728	-1.17877	0.048702	0.208611
FBgn0020261	pcm	5340.64	5792.32	4663.12	0.805052	-0.312845	0.0585053	0.236161
FBgn0020269	mspo	106.521	157.219	30.4748	0.193836	-2.36709	3.30031e-05	0.00060888
FBgn0020270	mre11	2671.33	2088.02	3546.31	1.69841	0.764185	2.21065e-05	0.000431241
FBgn0020272	mst	838.983	822.997	862.962	1.04856	0.068411	0.691375	0.990564
FBgn0020277	lush	3.91111	2.41299	6.1583	2.55215	1.35171	0.541394	0.895666
FBgn0020278	loco	2993.13	2796.3	3288.37	1.17597	0.233851	0.288018	0.645213
FBgn0020279	lig	36515.9	43048.3	26717.3	0.620636	-0.688182	3.44802e-05	0.000633018
FBgn0020280	laf	0.558531	0.930885	0	0	#NAME?	1	1
FBgn0020294	ko	10194.4	10486.6	9755.98	0.930327	-0.104189	0.387536	0.759691
FBgn0020299	stumps	2516.66	2345.41	2773.53	1.18254	0.241883	0.306111	0.666416
FBgn0020300	gk	492.113	606.879	319.964	0.52723	-0.923497	4.43387e-05	0.000778452
FBgn0020304	drongo	6350.03	5835.9	7121.22	1.22024	0.287167	0.165106	0.461068
FBgn0020305	dbe	1810.61	1806.3	1817.08	1.00597	0.00858626	0.923872	1
FBgn0020306	dom	34107.4	40515.9	24494.7	0.60457	-0.726019	0.000697365	0.00842076
FBgn0020307	dve	3452.61	4904.39	1274.96	0.259962	-1.94363	1.5455e-07	4.62581e-06
FBgn0020309	crol	34794.2	40091.9	26847.7	0.669654	-0.578512	0.000718273	0.00865465
FBgn0020312	CG4050	2742.08	3153.69	2124.66	0.673708	-0.569805	0.00586476	0.045145
FBgn0020368	Vha68-1	56.0789	55.9472	56.2763	1.00588	0.00846137	1	1
FBgn0020369	Pros45	408.144	454.673	338.351	0.744163	-0.426309	0.481496	0.846172
FBgn0020370	TppII	9103.54	10270.6	7352.91	0.715916	-0.482137	0.00491698	0.0399527
FBgn0020371	Tim17b2	0.186177	0.310295	0	0	#NAME?	1	1
FBgn0020372	TM4SF	8.56948	8.47725	8.70783	1.0272	0.0387168	0.870268	1
FBgn0020376	Sr-CIII	13.9325	11.1188	18.153	1.63264	0.707204	0.884217	1
FBgn0020377	Sr-CII	0	0	0	NA	NA	NA	NA
FBgn0020378	Sp1	115.032	140.714	76.5089	0.543718	-0.879069	0.119087	0.374803
FBgn0020379	Rfx	571.357	580.198	558.095	0.961905	-0.0560344	0.771946	1
FBgn0020381	Dredd	1852.12	2108.15	1468.08	0.696384	-0.522045	0.0370901	0.174067
FBgn0020385	pug	1654.26	2022.56	1101.81	0.54476	-0.876308	0.000124259	0.00189744
FBgn0020386	Pdk1	5451.91	5665.34	5131.76	0.905817	-0.142709	0.514624	0.873398
FBgn0020388	Pcaf	2241.33	2132.83	2404.08	1.12718	0.172717	0.301019	0.66088
FBgn0020389	Papss	1057.81	1141.31	932.565	0.817098	-0.291419	0.184021	0.492268
FBgn0020391	Nrk	121.093	99.3916	153.646	1.54587	0.628414	0.104446	0.343995
FBgn0020392	Nmt	4421.19	5096.06	3408.89	0.668926	-0.580081	0.00141359	0.0150649
FBgn0020399	Mst89B	4.61693	6.13712	2.33663	0.380737	-1.39313	0.520444	0.878165
FBgn0020407	asun	862.477	813.399	936.093	1.15084	0.202689	0.470931	0.835803
FBgn0020412	JIL-1	4873.25	5372.93	4123.73	0.767502	-0.381758	0.0241458	0.128968
FBgn0020414	Idgf3	86.8933	28.0186	175.205	6.25319	2.64459	0.000211253	0.00301706
FBgn0020415	Idgf2	99.7201	37.7861	192.621	5.09766	2.34984	1.79625e-12	1.26344e-10
FBgn0020416	Idgf1	0	0	0	NA	NA	NA	NA
FBgn0020429	GluRIIB	0.864142	1.44024	0	0	#NAME?	0.828226	1
FBgn0020439	fau	165.828	211.649	97.0971	0.458765	-1.12417	0.168035	0.466124
FBgn0020440	Fak56D	2433.44	2395.28	2490.7	1.03984	0.0563596	0.787663	1
FBgn0020443	Elf	12893.9	14709.4	10170.7	0.691441	-0.532321	0.00231089	0.0220024
FBgn0020445	E23	383.636	457.287	273.159	0.597347	-0.743359	0.0938923	0.31933
FBgn0020493	Dad	6683.72	6936.2	6304.99	0.908998	-0.137651	0.360201	0.731068
FBgn0020496	CtBP	39497.1	42908.5	34380	0.80124	-0.319694	0.0465688	0.203134
FBgn0020497	emb	17308.5	18504.1	15515.1	0.838468	-0.254172	0.0885767	0.308048
FBgn0020503	CLIP-190	3798.9	3844.67	3730.24	0.970239	-0.0435879	0.642559	0.963153
[truncated: 13,495 more rows]
