# Supplementary material for: The transcriptional response to tumorigenic polarity loss in Drosophila
Source: eLife. 2015 Feb 26;4:e03189. doi: 10.7554/eLife.03189 (PMC4369581; doi:10.7554/eLife.03189)
Supplement: Supplementary file 3. — Transcriptome Analysis of Psc/Su(Z)2 Tissue. Differential expression analysis of scrib versus white RNA-Seq data by DESeq. Each column contains the following information: Flybase ID- Flybase Gene Identifier; Gene Name- Name of each gene; baseMean_allconditions- Average normalized read count for that gene, across all samples, baseMean_iso- Normalized read count for that gene in iso42 tissue; baseMean_PscSuZ2- Normalized read count for that gene in Psc/Su(Z)2 tissue; foldChange- Change of the gene in scribble, relative to white tissue; foldChangelog2- Logarithm to base 2 of the fold change; pval- p-value for the statistical significance of the fold change; padj- p-value adjusted for multiple testing with the Benjamini-Hochberg procedure, which controls for false discovery rate (FDR). DOI: http://dx.doi.org/10.7554/eLife.03189.023 [file elife03189s003.xlsx]

## Sheet: PscSuZ2viso42
Flybase ID	Gene Name	baseMean_Allconditions	baseMean_iso42	baseMean_PscSuZ2	foldChange (PscSuZ2/iso)	log2FoldChange (PscSuZ2/iso)	pval	padj
FBgn0000003	7SLRNA:CR32864	0	0	0	NA	NA	NA	NA
FBgn0000008	a	1935.03	2000.97	1869.09	0.934088	-0.0983696	0.702872	0.903298
FBgn0000014	abd-A	1184.85	5.42304	2364.28	435.969	8.76808	1.85497e-88	9.78683e-85
FBgn0000015	Abd-B	4391.83	19.696	8763.96	444.96	8.79753	1.24084e-21	1.43883e-19
FBgn0000017	Abl	3489.9	4004.22	2975.58	0.743111	-0.428351	0.092501	0.272493
FBgn0000018	abo	542.026	463.926	620.126	1.33669	0.418667	0.0590552	0.19909
FBgn0000022	ac	0	0	0	NA	NA	NA	NA
FBgn0000024	Ace	33.799	34.8788	32.7193	0.938085	-0.0922088	0.889669	1
FBgn0000028	acj6	14.6492	13.2352	16.0631	1.21366	0.27937	0.483227	0.745804
FBgn0000032	Acph-1	1359.15	1290.25	1428.05	1.1068	0.1464	0.56475	0.811775
FBgn0000036	nAcRalpha-96Aa	7.53158	11.5924	3.47075	0.299399	-1.73986	0.185246	0.433417
FBgn0000037	mAcR-60C	1.03773	1.37784	0.697611	0.506307	-0.981917	0.995554	1
FBgn0000038	nAcRbeta-64B	0	0	0	NA	NA	NA	NA
FBgn0000039	nAcRalpha-96Ab	0.344461	0.688921	0	0	#NAME?	1	1
FBgn0000042	Act5C	259570	244521	274619	1.12309	0.167473	0.252457	0.524169
FBgn0000043	Act42A	0	0	0	NA	NA	NA	NA
FBgn0000044	Act57B	571.775	1057.98	85.5662	0.0808767	-3.62813	0.00046983	0.00449469
FBgn0000045	Act79B	7.00871	9.93635	4.08106	0.410721	-1.28377	0.364448	0.64212
FBgn0000046	Act87E	238.428	410.809	66.0481	0.160776	-2.63688	1.66885e-10	5.68054e-09
FBgn0000047	Act88F	12.1532	16.3707	7.93562	0.484745	-1.0447	0.449519	0.719886
FBgn0000052	ade2	3351.58	2869.42	3833.74	1.33607	0.417992	0.0733192	0.231514
FBgn0000053	ade3	4771.79	4848.35	4695.24	0.968419	-0.0462963	0.476396	0.739469
FBgn0000054	Adf1	3304.58	3914.79	2694.36	0.68825	-0.538995	0.0107618	0.0578396
FBgn0000055	Adh	0	0	0	NA	NA	NA	NA
FBgn0000056	Adhr	0	0	0	NA	NA	NA	NA
FBgn0000057	adp	932.517	880.396	984.638	1.1184	0.161441	0.681082	0.889201
FBgn0000061	al	1583.89	3014.9	152.87	0.0507049	-4.30173	1.32697e-20	1.32096e-18
FBgn0000063	ald	1386.63	1179.9	1593.37	1.35043	0.43342	0.0485621	0.174117
FBgn0000064	Ald	9951.39	8688.96	11213.8	1.29058	0.368021	0.226468	0.490092
FBgn0000071	Ama	9179.55	8386.32	9972.78	1.18917	0.249958	0.180126	0.426402
FBgn0000075	amd	342.789	491.567	194.012	0.394681	-1.34124	7.27463e-06	0.000117733
FBgn0000077	amx	278.21	258.897	297.523	1.14919	0.200621	0.520154	0.776222
FBgn0000078	Amy-d	3.7063	0	7.4126	Inf	Inf	0.0173174	0.0827674
FBgn0000079	Amy-p	0.671184	0.644758	0.697611	1.08197	0.113665	0.972393	1
FBgn0000083	AnnIX	13692.9	10888.9	16496.9	1.51502	0.599339	0.00505444	0.0316525
FBgn0000084	AnnX	421.842	510.949	332.734	0.651208	-0.618809	0.0578746	0.19627
FBgn0000092	CG2650	5.88956	6.02364	5.75549	0.955483	-0.0656976	1	1
FBgn0000094	Anp	0.348805	0	0.697611	Inf	Inf	0.987921	1
FBgn0000097	aop	6549.5	7497.83	5601.17	0.747039	-0.420745	0.0318605	0.128661
FBgn0000099	ap	10432.7	16621.2	4244.25	0.255352	-1.96944	2.03382e-20	1.96889e-18
FBgn0000100	RpLP0	77429.1	73367.3	81490.8	1.11072	0.151499	0.399765	0.67396
FBgn0000108	Appl	252.82	131.641	374	2.84105	1.50643	6.43861e-06	0.000105826
FBgn0000109	Aprt	293.136	316.532	269.739	0.85217	-0.230787	0.304971	0.583615
FBgn0000114	aret	197.503	181.093	213.912	1.18123	0.240288	0.742126	0.927943
FBgn0000115	Arf72A	2044.29	2183.7	1904.88	0.872319	-0.197072	0.27306	0.546706
FBgn0000116	Argk	15332.9	24421.3	6244.57	0.255701	-1.96747	1.32676e-08	3.56233e-07
FBgn0000117	arm	32470.8	35991.8	28949.7	0.804342	-0.314119	0.1175	0.321292
FBgn0000119	arr	7525.08	12155.5	2894.7	0.23814	-2.07012	7.48338e-21	7.74163e-19
FBgn0000120	Arr1	0.697611	0	1.39522	Inf	Inf	0.800643	0.957541
FBgn0000121	Arr2	0	0	0	NA	NA	NA	NA
FBgn0000137	ase	0	0	0	NA	NA	NA	NA
FBgn0000139	ash2	2739.72	2247.96	3231.49	1.43752	0.523581	0.0184697	0.0863741
FBgn0000140	asp	5555.29	5258.31	5852.27	1.11296	0.154399	0.603363	0.840597
FBgn0000146	aub	42.3998	49.7082	35.0913	0.705946	-0.50237	0.531566	0.785366
FBgn0000147	aur	1727.74	1714.02	1741.45	1.016	0.0229027	0.833019	0.976012
FBgn0000150	awd	34130.5	36549.5	31711.6	0.867635	-0.20484	0.400568	0.67413
FBgn0000152	Axs	705.564	683.617	727.512	1.06421	0.0897835	0.396959	0.671589
FBgn0000153	b	107.712	164.48	50.9452	0.309736	-1.69089	2.59063e-05	0.000362551
FBgn0000157	Dll	2695.56	4261.48	1129.65	0.265083	-1.91549	9.42741e-08	2.19802e-06
FBgn0000158	bam	16.1319	23.9444	8.31942	0.347448	-1.52513	0.150358	0.379476
FBgn0000163	baz	3395.3	3780.59	3010	0.796172	-0.328848	0.163588	0.400773
FBgn0000166	bcd	0	0	0	NA	NA	NA	NA
FBgn0000173	ben	13723.7	12404.9	15042.5	1.21262	0.278131	0.0561	0.191699
FBgn0000179	bi	0	0	0	NA	NA	NA	NA
FBgn0000180	bib	2036.28	3519.65	552.897	0.157088	-2.67035	1.97295e-10	6.67263e-09
FBgn0000181	bic	51189.7	44505.8	57873.5	1.30036	0.378909	0.0660316	0.214635
FBgn0000182	BicC	2.27553	1.28952	3.26155	2.52928	1.33873	0.811071	0.964656
FBgn0000183	BicD	3353.22	3654.81	3051.63	0.834962	-0.260218	0.268454	0.541937
FBgn0000206	boss	0	0	0	NA	NA	NA	NA
FBgn0000210	br	55675.7	83636.2	27715.2	0.331378	-1.59345	2.10774e-05	0.000301776
FBgn0000212	brm	11923.8	13954.2	9893.32	0.708984	-0.496174	0.00571393	0.0348517
FBgn0000216	Brd	435.971	479.387	392.556	0.818871	-0.288293	0.165263	0.403858
FBgn0000221	brn	322.241	351.756	292.727	0.832188	-0.265019	0.3923	0.666701
FBgn0000227	Bsg25A	0	0	0	NA	NA	NA	NA
FBgn0000228	Bsg25D	1855.42	2002.03	1708.8	0.853534	-0.228479	0.250394	0.521616
FBgn0000229	bsk	2982.38	3074.68	2890.08	0.939961	-0.0893272	0.921207	1
FBgn0000233	btd	906.99	26.3821	1787.6	67.7579	6.08232	3.88257e-57	5.8527e-54
FBgn0000239	bur	5428.64	5518.07	5339.21	0.967587	-0.0475369	0.754704	0.933604
FBgn0000241	bw	14.5997	28.5018	0.697611	0.024476	-5.35249	0.0424168	0.158329
FBgn0000242	Bx	2500.15	4524.51	475.789	0.105158	-3.24937	1.13006e-10	3.98808e-09
FBgn0000244	by	1936.82	1434.35	2439.28	1.70061	0.766053	0.0435536	0.161133
FBgn0000246	c(3)G	482.896	462.067	503.724	1.09016	0.124533	0.852269	0.986415
FBgn0000247	ca	1874.2	1913.1	1835.29	0.95933	-0.0599015	0.513821	0.771639
FBgn0000250	cact	4038.23	4631.54	3444.92	0.743796	-0.427021	0.0416408	0.156257
FBgn0000251	cad	891.515	19.9875	1763.04	88.2073	6.46283	6.15131e-53	6.49087e-50
FBgn0000253	Cam	46843.5	43588.3	50098.6	1.14936	0.20083	0.273189	0.546706
FBgn0000256	capu	3529.71	4402.1	2657.32	0.603648	-0.72822	0.000385305	0.00381044
FBgn0000257	car	1036.6	953.104	1120.1	1.17522	0.232929	0.31571	0.593713
FBgn0000258	CkIIalpha	10408.5	10547.8	10269.2	0.973593	-0.0386086	0.85839	0.98969
FBgn0000259	CkIIbeta	12117.2	12505.2	11729.2	0.937946	-0.092423	0.827925	0.973509
FBgn0000261	Cat	7288.38	9828.93	4747.83	0.483046	-1.04977	8.81969e-06	0.000139319
FBgn0000273	Pka-C1	5947.51	7134.1	4760.92	0.667348	-0.583489	0.00553529	0.0339584
FBgn0000274	Pka-C2	0.348805	0	0.697611	Inf	Inf	0.992249	1
FBgn0000276	CecA1	0.322379	0.644758	0	0	#NAME?	0.751692	0.932174
FBgn0000277	CecA2	0.889513	0	1.77903	Inf	Inf	0.190078	0.440257
FBgn0000278	CecB	0	0	0	NA	NA	NA	NA
FBgn0000279	CecC	0.161189	0.322379	0	0	#NAME?	0.981417	1
FBgn0000280	Cec-Psi1	0	0	0	NA	NA	NA	NA
FBgn0000281	Cec2	0	0	0	NA	NA	NA	NA
FBgn0000283	Cp190	12001	13382.5	10619.5	0.793536	-0.333633	0.0502026	0.177623
FBgn0000286	Cf2	1391.62	1524.89	1258.36	0.825215	-0.277159	0.185751	0.434118
FBgn0000287	salr	8235.52	9859.05	6611.98	0.670651	-0.576367	0.00145148	0.0114813
FBgn0000289	cg	12086.9	13706.3	10467.5	0.7637	-0.388922	0.0989244	0.285205
FBgn0000299	Cg25C	1861.47	2026.68	1696.25	0.836957	-0.256775	0.337629	0.615312
FBgn0000303	Cha	6.1252	12.2504	0	0	#NAME?	0.0106697	0.0575374
FBgn0000307	chif	0	0	0	NA	NA	NA	NA
FBgn0000308	chic	56742	60546.4	52937.7	0.874334	-0.193744	0.439853	0.711532
FBgn0000313	chp	362.195	368.321	356.07	0.966739	-0.0488013	0.839847	0.979958
FBgn0000316	cin	0	0	0	NA	NA	NA	NA
FBgn0000317	ck	3918.03	4718.31	3117.75	0.660777	-0.597764	0.0783879	0.243637
FBgn0000318	cl	3135.94	3358.54	2913.34	0.86744	-0.205164	0.256834	0.527543
FBgn0000319	Chc	22656.9	23770.9	21543	0.906276	-0.141978	0.630224	0.859189
FBgn0000320	eya	460.862	830.631	91.0944	0.109669	-3.18877	2.83738e-08	7.1627e-07
FBgn0000326	clt	1019.94	827.128	1212.75	1.46622	0.552103	0.0117847	0.0619763
FBgn0000330	cm	1229.65	1282.27	1177.03	0.91793	-0.123543	0.692601	0.895847
FBgn0000337	cn	6.57854	6.39018	6.7669	1.05895	0.082639	0.970693	1
FBgn0000339	cni	1814.15	1583.81	2044.49	1.29087	0.368339	0.0562053	0.191749
FBgn0000346	comt	935.626	559.196	1312.06	2.34633	1.23041	3.66356e-06	6.38516e-05
FBgn0000351	cort	285.249	300.899	269.599	0.895976	-0.158467	0.503261	0.763318
FBgn0000352	cos	3755	4116.77	3393.24	0.824247	-0.278852	0.137176	0.35758
FBgn0000355	Cp15	15.5245	7.59137	23.4577	3.09004	1.62763	0.2856	0.561246
FBgn0000356	Cp16	0	0	0	NA	NA	NA	NA
FBgn0000357	Cp18	7.24428	10.3029	4.18566	0.406261	-1.29952	0.470169	0.736222
FBgn0000358	Cp19	0.644758	1.28952	0	0	#NAME?	0.674883	0.885838
FBgn0000359	Cp36	0	0	0	NA	NA	NA	NA
FBgn0000360	Cp38	0	0	0	NA	NA	NA	NA
FBgn0000363	cpo	191.959	80.8819	303.035	3.74664	1.9056	0.000154428	0.00172802
FBgn0000370	crc	43407.8	36596.3	50219.3	1.37225	0.456544	0.019385	0.0894799
FBgn0000376	crm	2030.39	1805.71	2255.06	1.24885	0.3206	0.294323	0.570452
FBgn0000377	crn	3119.83	2593.05	3646.61	1.4063	0.491908	0.0274213	0.114639
FBgn0000382	csw	3114.35	3706.21	2522.49	0.680611	-0.555098	0.00598782	0.0362499
FBgn0000384	cta	2035.37	2084.52	1986.23	0.952847	-0.0696837	0.649833	0.869908
FBgn0000392	cup	390.288	462.212	318.363	0.688781	-0.537884	0.00853885	0.0481829
FBgn0000394	cv	1665.52	1789.38	1541.66	0.861562	-0.214973	0.32213	0.599522
FBgn0000395	cv-2	1950.31	2701.96	1198.66	0.443626	-1.17259	1.25593e-07	2.86233e-06
FBgn0000404	CycA	11981.6	11857.4	12105.9	1.02096	0.0299263	0.850724	0.985491
FBgn0000405	CycB	10000.6	10583.7	9417.48	0.889812	-0.168428	0.392041	0.666675
FBgn0000406	Cyt-b5-r	0.161189	0.322379	0	0	#NAME?	0.987778	1
FBgn0000409	Cyt-c-p	4348.08	3306.92	5389.25	1.62969	0.704599	0.000259321	0.00270391
FBgn0000411	D	209.727	6.0678	413.386	68.1278	6.09017	7.67268e-08	1.81937e-06
FBgn0000412	D1	33489.8	36205.3	30774.3	0.849992	-0.234478	0.240011	0.507433
FBgn0000413	da	4561.9	4916.2	4207.6	0.855865	-0.224545	0.216561	0.477476
FBgn0000414	Dab	3242.07	3949.36	2534.78	0.641819	-0.639762	0.00114952	0.00947911
FBgn0000416	Sap-r	12362.5	11996.5	12728.5	1.06102	0.0854452	0.70231	0.902873
FBgn0000422	Ddc	405.731	559.632	251.83	0.449991	-1.15203	0.194661	0.446759
FBgn0000426	SmF	0	0	0	NA	NA	NA	NA
FBgn0000427	dec-1	0	0	0	NA	NA	NA	NA
FBgn0000439	Dfd	194.207	1.70022	386.715	227.45	7.8294	5.06355e-23	6.43742e-21
FBgn0000442	Pkg21D	0.805947	1.61189	0	0	#NAME?	0.579804	0.822767
FBgn0000447	Dhod	3902.1	3754.38	4049.82	1.07869	0.109283	0.730302	0.919808
FBgn0000448	Hr46	1024.76	1960.39	89.1251	0.0454628	-4.45917	0.0920907	0.271664
FBgn0000449	dib	43.7497	74.5933	12.9062	0.173021	-2.53098	0.0119651	0.0626271
FBgn0000451	ect	45.1709	65.2443	25.0975	0.384669	-1.37831	0.0108105	0.0579929
FBgn0000454	Dip-B	4985.53	4551.79	5419.28	1.19058	0.251667	0.195781	0.448123
FBgn0000455	Dip-C	1240.66	1224.85	1256.47	1.02582	0.0367734	0.726609	0.917237
FBgn0000459	disco	2063.98	334.833	3793.13	11.3284	3.50188	2.70171e-35	8.63892e-33
FBgn0000463	Dl	6867.86	9466.28	4269.44	0.451016	-1.14875	9.43617e-08	2.19802e-06
FBgn0000464	Lar	3283.56	4301.75	2265.38	0.526619	-0.925169	0.00316539	0.0218436
FBgn0000473	Cyp6a2	0	0	0	NA	NA	NA	NA
FBgn0000477	DNaseII	2.6232	5.24639	0	0	#NAME?	0.102741	0.291903
FBgn0000479	dnc	1163.31	1450.35	876.283	0.604189	-0.726928	0.269156	0.542309
FBgn0000482	dor	1520.85	1568.87	1472.83	0.938778	-0.091144	0.674752	0.885838
FBgn0000489	Pka-C3	299.757	547.069	52.4443	0.0958641	-3.38287	9.38606e-08	2.19802e-06
FBgn0000490	dpp	4364.59	3400.4	5328.78	1.5671	0.648102	0.00309966	0.0214899
FBgn0000492	Dr	2807.69	4094.77	1520.61	0.371355	-1.42913	9.97206e-12	4.03804e-10
FBgn0000497	ds	23704	28931.7	18476.3	0.638618	-0.646974	0.0987798	0.284894
FBgn0000499	dsh	2499.37	2913.74	2085.01	0.715581	-0.482813	0.00875908	0.0491888
FBgn0000500	Dsk	0	0	0	NA	NA	NA	NA
FBgn0000504	dsx	4853.77	2733.89	6973.64	2.55081	1.35096	0.000337588	0.00342522
FBgn0000520	dwg	979.828	982.727	976.93	0.9941	-0.00853641	0.693492	0.896561
FBgn0000524	dx	5005.98	5923.57	4088.4	0.690191	-0.534932	0.0061321	0.0369748
FBgn0000527	e	41.1283	68.9494	13.3073	0.193001	-2.37332	0.0948766	0.277247
FBgn0000529	bsh	0	0	0	NA	NA	NA	NA
FBgn0000533	ea	940.96	429.63	1452.29	3.38033	1.75716	2.62646e-05	0.000366593
FBgn0000535	eag	1.68248	2.66736	0.697611	0.261536	-1.93492	0.445513	0.716742
FBgn0000536	eas	2288.61	2434.06	2143.15	0.880483	-0.183633	0.593809	0.83456
FBgn0000541	E(bx)	17812.9	19399.6	16226.1	0.836412	-0.257714	0.229717	0.493983
FBgn0000542	ec	11955.5	15796.9	8114.07	0.513649	-0.961145	0.00160352	0.0124781
FBgn0000543	ecd	1970.53	2188.16	1752.9	0.801087	-0.319969	0.0855307	0.257528
FBgn0000546	EcR	6477.96	6723.9	6232.03	0.926848	-0.109596	0.486835	0.749065
FBgn0000547	ed	21613.7	30304.5	12923	0.426438	-1.22959	1.55769e-06	2.9195e-05
FBgn0000551	Edg78E	11.1596	22.3192	0	0	#NAME?	0.00348488	0.0236792
FBgn0000552	Edg84A	0	0	0	NA	NA	NA	NA
FBgn0000556	Ef1alpha48D	525580	419734	631426	1.50435	0.589138	0.0202681	0.0921748
FBgn0000557	Ef1alpha100E	1211.09	2365.58	56.5961	0.0239248	-5.38535	1.38465e-08	3.70834e-07
FBgn0000559	Ef2b	185084	174323	195846	1.12347	0.16796	0.480533	0.743814
FBgn0000560	eg	80.2762	113.95	46.6023	0.408971	-1.28993	0.0082642	0.0471372
FBgn0000562	egl	4032.81	4547.97	3517.64	0.773453	-0.370614	0.0499485	0.177203
FBgn0000564	Eh	0.697611	0	1.39522	Inf	Inf	0.895495	1
FBgn0000565	Eip71CD	1951.29	2051.42	1851.15	0.902375	-0.1482	0.960879	1
FBgn0000566	Eip55E	3016.66	2698.77	3334.55	1.23558	0.305194	0.288827	0.563896
FBgn0000567	Eip74EF	3742.53	4690.62	2794.45	0.595753	-0.747213	0.000603561	0.00554771
FBgn0000568	Eip75B	7207.96	10710	3705.87	0.346018	-1.53108	0.00322145	0.0221307
FBgn0000575	emc	19101.8	17982.8	20220.8	1.12445	0.169216	0.353772	0.632927
FBgn0000576	ems	1245.09	2243.24	246.946	0.110085	-3.18331	4.40817e-36	1.45359e-33
FBgn0000577	en	2209.61	3257.5	1161.73	0.356633	-1.48749	7.32741e-07	1.48976e-05
FBgn0000578	ena	4276.01	5323.1	3228.91	0.606585	-0.721219	0.000402495	0.0039569
FBgn0000579	Eno	15938.9	16135.4	15742.3	0.975635	-0.035587	0.788417	0.950672
FBgn0000581	E(Pc)	9531.39	10248.3	8814.47	0.860091	-0.217439	0.178639	0.424071
FBgn0000588	esc	0	0	0	NA	NA	NA	NA
FBgn0000591	E(spl)	501.47	829.509	173.431	0.209077	-2.25789	8.51492e-07	1.71e-05
FBgn0000592	Est-6	11.99	5.0565	18.9236	3.74242	1.90397	0.113825	0.314289
FBgn0000594	Est-P	101.105	97.8621	104.348	1.06628	0.0925846	0.655595	0.874458
FBgn0000606	eve	182.54	0.322379	364.758	1131.46	10.144	1.59274e-23	2.12742e-21
FBgn0000611	exd	9828.9	11139.4	8518.42	0.764711	-0.387013	0.10356	0.293516
FBgn0000615	exu	111.402	105.758	117.047	1.10674	0.146317	0.36127	0.639832
FBgn0000617	e(y)1	1516.35	1458.28	1574.42	1.07964	0.110557	0.718956	0.913459
FBgn0000618	e(y)2	1087.05	883.726	1290.36	1.46014	0.546108	0.0155244	0.0762855
FBgn0000625	eyg	1629.23	2374.14	884.327	0.372483	-1.42475	0.00101448	0.00858445
FBgn0000629	E(z)	1986.03	1976.97	1995.09	1.00916	0.0131607	0.91008	1
FBgn0000633	fas	15.5563	4.68996	26.4227	5.63389	2.49413	0.00862854	0.048585
FBgn0000635	Fas2	11834.1	10696	12972.1	1.21279	0.278336	0.132154	0.348622
FBgn0000636	Fas3	25076.6	31357.7	18795.5	0.599388	-0.738437	0.000213172	0.00227671
FBgn0000639	Fbp1	1525.96	2426.19	625.728	0.257906	-1.95508	0.57621	0.819429
FBgn0000640	Fbp2	289.051	548.296	29.8069	0.0543628	-4.20124	0.247838	0.517859
FBgn0000644	Fcp3C	53.5382	51.4571	55.6193	1.08089	0.112217	0.636706	0.862565
FBgn0000658	fj	7789.67	12433	3146.37	0.253067	-1.98241	3.23476e-20	3.02064e-18
FBgn0000659	fkh	632.118	17.9075	1246.33	69.5981	6.12098	3.02128e-13	1.52539e-11
FBgn0000662	fl(2)d	4890.62	5852.83	3928.4	0.671197	-0.575192	0.0127687	0.0657244
FBgn0000667	Actn	7005.51	7915.83	6095.2	0.770002	-0.377066	0.0719934	0.228818
FBgn0000709	fliI	2071.55	2253.56	1889.54	0.838468	-0.254172	0.225439	0.488593
FBgn0000711	flw	2895.89	3055.53	2736.24	0.895505	-0.159227	0.420986	0.694864
FBgn0000715	Fmrf	0	0	0	NA	NA	NA	NA
FBgn0000719	fog	1046.34	873.949	1218.74	1.39452	0.479769	0.0753685	0.235711
FBgn0000721	for	3275.43	4309.41	2241.45	0.520128	-0.943061	7.74596e-06	0.000124597
FBgn0000723	Fps85D	3866.81	4901.66	2831.96	0.577754	-0.791473	0.0461826	0.167694
FBgn0000808	gd	109.174	22.7299	195.617	8.60615	3.10537	2.46283e-05	0.000346966
FBgn0000810	fs(1)K10	1980.58	2180.19	1780.97	0.816889	-0.291787	0.23693	0.504151
FBgn0000826	png	30.7656	33.3994	28.1317	0.842283	-0.247623	0.376923	0.653271
FBgn0000927	fs(1)Ya	0.322379	0.644758	0	0	#NAME?	0.731543	0.920711
FBgn0000928	fs(1)Yb	37.5697	23.3747	51.7648	2.21456	1.14702	0.135852	0.355268
FBgn0000964	tj	0	0	0	NA	NA	NA	NA
FBgn0000996	dup	3341.08	2922.11	3760.06	1.28676	0.363746	0.149507	0.378412
FBgn0001075	ft	14216.2	17127.4	11305.1	0.660057	-0.599338	0.254838	0.525924
FBgn0001077	ftz	0	0	0	NA	NA	NA	NA
FBgn0001078	ftz-f1	2818.22	1207.66	4428.77	3.66724	1.87469	3.66699e-06	6.38516e-05
FBgn0001079	fu	1111.62	1195.84	1027.4	0.859149	-0.219021	0.188924	0.438716
FBgn0001083	fw	2005.84	2110.32	1901.37	0.900986	-0.150424	0.460105	0.728414
FBgn0001084	fy	844.666	1046.8	642.535	0.61381	-0.704135	0.00488225	0.0308119
FBgn0001085	fz	6739.14	8066.94	5411.34	0.670805	-0.576035	0.0306599	0.124961
FBgn0001086	fzy	4190.44	4328.14	4052.74	0.936371	-0.0948485	0.544802	0.795061
FBgn0001087	g	3458.99	3533.08	3384.89	0.958056	-0.0618187	0.751449	0.932174
FBgn0001089	Gal	104.342	169.651	39.0332	0.230079	-2.1198	0.19029	0.440435
FBgn0001090	bnb	0	0	0	NA	NA	NA	NA
FBgn0001091	Gapdh1	7744.93	8220	7269.86	0.884411	-0.177211	0.323252	0.600467
FBgn0001092	Gapdh2	19183.1	19040.1	19326	1.01501	0.0214988	0.974654	1
FBgn0001098	Gdh	17241.3	10450.4	24032.2	2.29965	1.20141	0.000194639	0.00210433
FBgn0001099	gdl	0	0	0	NA	NA	NA	NA
FBgn0001104	G-ialpha65A	9636.76	10693.5	8580.07	0.802367	-0.317666	0.124219	0.333697
FBgn0001105	Gbeta13F	8631.17	8772.29	8490.04	0.967825	-0.047182	0.92093	1
FBgn0001108	Gl	3037.56	3557.5	2517.62	0.707694	-0.498802	0.0202833	0.0921748
FBgn0001112	Gld	435.448	699.855	171.04	0.244394	-2.03272	2.19641e-05	0.000313487
FBgn0001114	Glt	975.705	530.451	1420.96	2.67877	1.42157	0.0263014	0.111146
FBgn0001120	gnu	1.57308	2.25665	0.889513	0.394173	-1.3431	0.631287	0.85954
FBgn0001122	G-oalpha47A	2318.2	2554.11	2082.28	0.815267	-0.294656	0.189331	0.439178
FBgn0001123	G-salpha60A	5613.96	6310.32	4917.59	0.779294	-0.35976	0.0740432	0.233016
FBgn0001124	Got1	3850.36	4250.99	3449.73	0.811512	-0.301315	0.291627	0.567018
FBgn0001125	Got2	4466.5	4611.26	4321.73	0.937213	-0.0935506	0.648482	0.869587
FBgn0001128	Gpdh	886.054	725.535	1046.57	1.44249	0.528558	0.0233341	0.102124
FBgn0001133	grau	837.991	825.221	850.762	1.03095	0.0439755	0.966677	1
FBgn0001134	Grd	4.5467	5.01234	4.08106	0.814203	-0.296539	0.723171	0.915855
FBgn0001137	grk	477.345	457.819	496.872	1.0853	0.118098	0.371657	0.647634
FBgn0001138	grn	3477.55	4986.08	1969.03	0.394904	-1.34043	6.62001e-08	1.59122e-06
FBgn0001139	gro	12416.2	13905.7	10926.7	0.785771	-0.34782	0.0691912	0.221984
FBgn0001142	Gs1	0	0	0	NA	NA	NA	NA
FBgn0001145	Gs2	462.273	888.093	36.4519	0.0410452	-4.60664	1.83344e-14	1.0748e-12
FBgn0001147	gsb-n	174.888	4.96817	344.808	69.4033	6.11693	4.8889e-08	1.18866e-06
FBgn0001148	gsb	78.3112	13.7475	142.875	10.3928	3.37751	4.26521e-05	0.000562309
FBgn0001149	GstD1	33074.1	39726.4	26421.8	0.665093	-0.588372	0.00605225	0.0365769
FBgn0001150	gt	28.784	36.4642	21.1037	0.578751	-0.788985	0.470978	0.736535
FBgn0001168	h	3294.56	3198.44	3390.67	1.0601	0.0842	0.993542	1
FBgn0001169	H	4948.82	5224.6	4673.03	0.894429	-0.160961	0.270991	0.544044
FBgn0001170	H2.0	143.634	164.188	123.081	0.749632	-0.415746	0.438206	0.71083
FBgn0001174	halo	0	0	0	NA	NA	NA	NA
FBgn0001179	hay	0	0	0	NA	NA	NA	NA
FBgn0001180	hb	1.7176	0.644758	2.79044	4.32789	2.11366	0.913378	1
FBgn0001185	her	1837.81	1920.83	1754.79	0.913557	-0.130433	0.431754	0.705969
FBgn0001186	Hex-A	4146.36	3187.35	5105.37	1.60176	0.679658	0.0313854	0.1272
FBgn0001187	Hex-C	0	0	0	NA	NA	NA	NA
FBgn0001189	hfw	2376.67	2736.12	2017.22	0.737254	-0.439767	0.0173618	0.0827756
FBgn0001197	His2Av	25838.6	25364	26313.1	1.03742	0.0529967	0.719067	0.913459
FBgn0001202	hk	1348.4	1448.12	1248.69	0.862289	-0.213756	0.306886	0.585544
FBgn0001206	Hmr	1678.34	1440.47	1916.21	1.33027	0.411716	0.0958814	0.279255
FBgn0001208	Hn	46.8058	47.6724	45.9393	0.963646	-0.0534255	0.701747	0.902699
FBgn0001215	Hrb98DE	26945.6	28792.5	25098.8	0.871713	-0.198074	0.260134	0.531757
FBgn0001216	Hsc70-1	0.671184	0.644758	0.697611	1.08197	0.113665	0.98376	1
FBgn0001217	Hsc70-2	58.3924	1.0113	115.773	114.48	6.83895	1.52517e-12	7.02777e-11
FBgn0001218	Hsc70-3	35364.3	46525.9	24202.6	0.520195	-0.942877	0.00506084	0.0316738
FBgn0001219	Hsc70-4	201602	166722	236483	1.41843	0.504294	0.0632427	0.208804
FBgn0001220	Hsc70-5	9073.68	9016.72	9130.65	1.01264	0.0181159	0.904885	1
FBgn0001222	Hsf	3699.57	4013.12	3386.02	0.843736	-0.245137	0.439282	0.711154
FBgn0001223	Hsp22	0	0	0	NA	NA	NA	NA
FBgn0001224	Hsp23	55044.1	93679.4	16408.8	0.175159	-2.51326	0.0843145	0.254924
FBgn0001225	Hsp26	22397.4	31393.2	13401.5	0.426893	-1.22805	0.614362	0.847862
FBgn0001226	Hsp27	68679.7	115354	22005.5	0.190766	-2.39013	0.00479799	0.0303892
FBgn0001227	Hsp67Ba	6715.92	12532.9	898.917	0.0717245	-3.80139	3.29245e-06	5.82919e-05
FBgn0001228	Hsp67Bb	3.80648	3.44461	4.16836	1.21011	0.275141	0.822254	0.971209
FBgn0001229	Hsp67Bc	334.935	410.919	258.952	0.630178	-0.666168	0.875293	0.997203
FBgn0001230	Hsp68	15072	20894.8	9249.18	0.442654	-1.17575	0.617761	0.849662
FBgn0001233	Hsp83	113344	122222	104467	0.854731	-0.226457	0.724605	0.916351
FBgn0001234	Hsromega	3502.01	4598.76	2405.27	0.523026	-0.935047	0.615152	0.848707
FBgn0001235	hth	28090.6	41733.1	14448.1	0.346202	-1.53031	0.00470363	0.0299715
FBgn0001247	Ide	3380.95	2955.57	3806.34	1.28785	0.364969	0.0673073	0.217727
FBgn0001248	Idh	15319.5	17982	12657	0.70387	-0.50662	0.0207137	0.0936066
FBgn0001250	if	2356.52	3547.94	1165.1	0.328387	-1.60653	5.46486e-06	9.10983e-05
FBgn0001253	ImpE1	8968.62	16908.3	1028.93	0.0608538	-4.03851	0.00393677	0.0260444
FBgn0001254	ImpE2	49236.2	97998.4	473.963	0.00483644	-7.69184	1.4794e-10	5.15202e-09
FBgn0001255	ImpE3	0	0	0	NA	NA	NA	NA
FBgn0001256	ImpL1	26.8457	52.9939	0.697611	0.013164	-6.24726	5.52847e-08	1.33493e-06
FBgn0001257	ImpL2	4364.26	2637.39	6091.13	2.30953	1.2076	0.0163024	0.0790182
FBgn0001258	ImpL3	2975.34	711.072	5239.6	7.3686	2.88139	0.000236842	0.00250668
FBgn0001259	in	1442.53	1661.03	1224.03	0.736912	-0.440436	0.0353913	0.139087
FBgn0001263	inaD	71.8884	79.61	64.1668	0.806014	-0.311123	0.88481	1
FBgn0001269	inv	2940.02	4154.86	1725.18	0.41522	-1.26805	7.34296e-09	2.05525e-07
FBgn0001276	ix	536.226	555.332	517.12	0.931191	-0.102851	0.54013	0.792472
FBgn0001280	janA	3524.46	3815.37	3233.55	0.847508	-0.238701	0.373455	0.649597
FBgn0001281	janB	1.83077	1.28952	2.37203	1.83948	0.879295	0.783875	0.949321
FBgn0001285	Jon44E	12.4116	24.8232	0	0	#NAME?	0.314046	0.592287
FBgn0001291	Jra	2684.59	2759.93	2609.26	0.945409	-0.0809901	0.473342	0.737936
FBgn0001296	kar	235.74	292.416	179.065	0.612364	-0.707538	0.0065694	0.0392305
FBgn0001297	kay	8147.31	7536.31	8758.31	1.16215	0.216794	0.723382	0.915973
FBgn0001301	kel	3977.22	4455.92	3498.51	0.785137	-0.348984	0.0522471	0.182674
FBgn0001308	Khc	7728.4	7525.87	7930.92	1.05382	0.0756302	0.671616	0.882992
FBgn0001311	kkv	8087.74	10693	5482.47	0.512716	-0.963769	3.44503e-06	6.0691e-05
FBgn0001313	kl-2	0	0	0	NA	NA	NA	NA
FBgn0001314	kl-3	0	0	0	NA	NA	NA	NA
FBgn0001315	kl-5	0	0	0	NA	NA	NA	NA
FBgn0001316	klar	24469.8	23904.5	25035.1	1.04729	0.0666669	0.944381	1
FBgn0001319	kn	734.318	1421.09	47.5429	0.0334552	-4.90163	3.21557e-50	2.42362e-47
FBgn0001320	kni	644.515	1196.89	92.1405	0.0769833	-3.69931	1.25009e-42	5.99589e-40
FBgn0001321	knk	3376.51	3539.66	3213.36	0.907814	-0.139531	0.311673	0.591375
FBgn0001323	knrl	755.992	1438.47	73.5134	0.0511053	-4.29038	4.03258e-47	2.65949e-44
FBgn0001324	kto	5500.23	5796.73	5203.73	0.8977	-0.155694	0.289174	0.564147
FBgn0001325	Kr	183.85	1.0113	366.689	362.592	8.5022	0.00158923	0.0123896
FBgn0001330	kz	1769.71	1603.51	1935.92	1.2073	0.271783	0.316964	0.594486
FBgn0001332	L	3872.46	2522.19	5222.73	2.07071	1.05013	3.92076e-06	6.77117e-05
FBgn0001337	Exp6	4518.16	4537.57	4498.75	0.991445	-0.0123957	0.873526	0.995956
FBgn0001341	l(1)1Bi	3222.41	3086.27	3358.56	1.08823	0.121982	0.670227	0.88253
FBgn0001404	egh	1878.2	2113.9	1642.49	0.776996	-0.36402	0.0830588	0.252648
FBgn0001491	l(1)10Bb	1756.42	1673.57	1839.26	1.099	0.136197	0.327678	0.605863
FBgn0001565	Hlc	3702.51	3463.75	3941.27	1.13786	0.186326	0.507447	0.766826
FBgn0001612	l(1)dd4	2595.56	2471.31	2719.81	1.10055	0.138231	0.620438	0.851574
FBgn0001624	dlg1	9141.67	10339.9	7943.48	0.768239	-0.380373	0.0842182	0.254779
FBgn0001941	ifc	2768.35	2544.57	2992.13	1.17589	0.233755	0.214436	0.474766
FBgn0001942	eIF-4a	101652	89608.8	113694	1.26878	0.343447	0.121142	0.327597
FBgn0001961	Sop2	3844.67	3584.47	4104.86	1.14518	0.19557	0.664598	0.879839
FBgn0001965	Sos	3832.5	4435.54	3229.46	0.728087	-0.457816	0.00629546	0.0378517
FBgn0001967	nimC3	9.66021	17.9252	1.39522	0.0778358	-3.68342	0.0127864	0.0657836
FBgn0001970	Pgant35A	16.9841	15.6376	18.3306	1.17221	0.229231	0.728521	0.91888
FBgn0001974	l(2)35Bd	1111.46	1117.06	1105.86	0.989972	-0.0145408	0.755199	0.933815
FBgn0001977	l(2)35Bg	2212.33	2093.08	2331.57	1.11394	0.155674	0.564592	0.811659
FBgn0001978	stc	4636.53	4073.77	5199.29	1.27628	0.35195	0.142797	0.368297
FBgn0001981	esg	4283.17	2846.1	5720.25	2.00986	1.00709	0.000146788	0.00165305
FBgn0001983	wor	7.92464	9.29159	6.5577	0.705767	-0.502736	0.646439	0.868313
FBgn0001986	l(2)35Df	2826.16	2628.29	3024.03	1.15057	0.202349	0.443468	0.715406
FBgn0001987	Gli	6737.66	8709.46	4765.86	0.547205	-0.869847	7.19612e-05	0.000887073
FBgn0001989	l(2)35Di	2042.01	1857.13	2226.89	1.1991	0.261952	0.319629	0.596629
FBgn0001990	wek	850.742	750.61	950.874	1.2668	0.341191	0.179542	0.425737
FBgn0001991	Ca-alpha1D	3.42697	3.76699	3.08695	0.819474	-0.28723	0.979825	1
FBgn0001992	Cyp303a1	29.4291	48.8471	10.0111	0.204949	-2.28667	0.00471663	0.0299818
FBgn0001994	crp	10733.8	10144.7	11322.9	1.11614	0.158521	0.540131	0.792472
FBgn0001995	mRpL4	1060.73	1014.64	1106.83	1.09086	0.125467	0.786471	0.950172
FBgn0002021	l(2)37Bb	900.641	747.488	1053.79	1.40978	0.495473	0.0173467	0.0827756
FBgn0002022	Catsup	4162.17	4552.63	3771.7	0.828467	-0.271484	0.307142	0.585751
FBgn0002023	Lim3	0.845863	0	1.69173	Inf	Inf	0.362499	0.640277
FBgn0002031	l(2)37Cc	7061.56	6127.61	7995.51	1.30483	0.383866	0.0645478	0.211393
FBgn0002036	CG10561	197.433	157.286	237.579	1.51049	0.595021	0.101112	0.289219
FBgn0002044	swm	4745.35	5367.16	4123.53	0.768289	-0.380279	0.048465	0.173947
FBgn0002069	Aats-asp	8857.53	9134.27	8580.79	0.939406	-0.0901789	0.619742	0.850946
FBgn0002121	l(2)gl	18112.3	13502.4	22722.2	1.68283	0.750888	0.000339095	0.0034339
FBgn0002174	l(2)tid	0	0	0	NA	NA	NA	NA
FBgn0002183	dre4	15872.2	14650	17094.4	1.16685	0.222619	0.342974	0.621948
FBgn0002283	l(3)73Ah	1155.94	1346.32	965.56	0.717183	-0.479586	0.0460879	0.167465
FBgn0002284	Pros26	5818.97	5775.18	5862.76	1.01517	0.0217151	0.778246	0.947079
FBgn0002306	sas	11192.2	11444.3	10940	0.955934	-0.0650178	0.586695	0.828274
FBgn0002354	l(3)87Df	361.994	328.447	395.541	1.20427	0.268164	0.476274	0.739469
FBgn0002413	dco	8486.16	8965.11	8007.22	0.893154	-0.163019	0.360501	0.639055
FBgn0002431	hyd	13069.3	13686.5	12452.1	0.909808	-0.136366	0.543073	0.79477
FBgn0002440	l(3)mbn	0.344461	0.688921	0	0	#NAME?	0.998555	1
FBgn0002441	l(3)mbt	2683.71	2579.64	2787.77	1.08068	0.111944	0.984001	1
FBgn0002466	sti	10415.3	9604.67	11226	1.16881	0.225038	0.371987	0.647715
FBgn0002521	pho	6369.51	6230.03	6508.99	1.04478	0.0631953	0.457604	0.726658
FBgn0002522	lab	41.1989	15.6685	66.7292	4.2588	2.09045	0.000264215	0.00275221
FBgn0002524	lace	3095.53	2419.02	3772.04	1.55932	0.64092	0.00176803	0.0134995
FBgn0002525	Lam	29390	31124.5	27655.5	0.888545	-0.170484	0.375657	0.651966
FBgn0002526	LanA	21940.6	22009	21872.1	0.993782	-0.00899829	0.892875	1
FBgn0002528	LanB2	8750.56	10048.5	7452.62	0.741666	-0.431158	0.0455585	0.166114
FBgn0002531	Lcp1	9.05092	18.1018	0	0	#NAME?	0.00704506	0.0415073
FBgn0002533	Lcp2	9.43504	18.1725	0.697611	0.0383883	-4.70319	0.0017407	0.0133004
FBgn0002534	Lcp3	6.42141	12.5463	0.296504	0.0236328	-5.40307	0.275918	0.55048
FBgn0002535	Lcp4	9.60735	19.2147	0	0	#NAME?	0.0196109	0.0901283
FBgn0002542	lds	5534.91	5111.48	5958.34	1.16568	0.221167	0.219508	0.481042
FBgn0002543	lea	13653.4	15805	11501.7	0.72773	-0.458526	0.0529081	0.18412
FBgn0002552	lin	1700.88	2012.12	1389.63	0.69063	-0.534016	0.00874257	0.0491456
FBgn0002561	l(1)sc	0	0	0	NA	NA	NA	NA
FBgn0002562	Lsp1alpha	201.537	400.894	2.18013	0.00543818	-7.52266	0.0694158	0.222377
FBgn0002563	Lsp1beta	1060.13	1989.94	130.321	0.06549	-3.93258	0.177592	0.422728
FBgn0002564	Lsp1gamma	1705.86	3294.79	116.925	0.0354878	-4.81653	0.272591	0.546255
FBgn0002565	Lsp2	1029.11	1699.42	358.804	0.211133	-2.24377	0.332043	0.609761
FBgn0002566	lt	4027.41	4045.33	4009.5	0.991143	-0.0128351	0.768914	0.942234
FBgn0002567	ltd	332.372	449.141	215.604	0.480037	-1.05878	0.107486	0.301245
FBgn0002569	Mal-A2	0.8588	0.322379	1.39522	4.32789	2.11366	0.997449	1
FBgn0002570	Mal-A1	0.805947	1.61189	0	0	#NAME?	0.532909	0.786469
FBgn0002571	Mal-A3	2.33593	2.57903	2.09283	0.81148	-0.301373	0.870901	0.995531
FBgn0002573	sens	147.864	189.51	106.217	0.56048	-0.835264	0.376472	0.652948
FBgn0002576	lz	613.387	9.83479	1216.94	123.738	6.95115	8.11923e-24	1.14232e-21
FBgn0002577	m	63.523	123.069	3.97646	0.0323107	-4.95184	0.000133877	0.00152227
FBgn0002578	m1	14.9085	25.6314	4.18566	0.163303	-2.61438	0.00727973	0.0427705
FBgn0002579	RpL36	63663.4	47472.7	79854.1	1.6821	0.750267	0.00205108	0.0152631
FBgn0002590	RpS5a	77161.1	62774.5	91547.6	1.45836	0.544343	0.00299737	0.0209459
FBgn0002592	m2	1374.24	2087.54	660.942	0.316612	-1.65921	0.000162636	0.00181218
FBgn0002593	RpLP1	70551.2	49799.5	91302.9	1.83341	0.874528	0.00337443	0.0230466
FBgn0002607	RpL19	76382.6	64589	88176.3	1.36519	0.449103	0.0675328	0.218323
FBgn0002609	HLHm3	3007.07	2250.36	3763.79	1.67252	0.742028	0.123874	0.33294
FBgn0002622	RpS3	84758.4	69438.7	100078	1.44124	0.527314	0.00316725	0.0218436
FBgn0002626	RpL32	33005.1	28959.9	37050.2	1.27936	0.355424	0.136252	0.356138
FBgn0002629	m4	601.456	1002.73	200.184	0.19964	-2.32453	3.02504e-12	1.33001e-10
FBgn0002631	HLHm5	23.0078	42.5276	3.48805	0.0820187	-3.6079	0.00288262	0.0203325
FBgn0002632	m6	259.893	484.589	35.1959	0.0726304	-3.78328	9.9499e-05	0.00118367
FBgn0002633	HLHm7	672.38	1157.06	187.701	0.162222	-2.62396	0.000936824	0.00803035
FBgn0002638	Bj1	7604.21	7290.01	7918.42	1.0862	0.119292	0.508319	0.767021
FBgn0002641	mal	1455.79	1132.09	1779.48	1.57185	0.652467	0.00136984	0.0109921
FBgn0002643	mam	7423.23	8368.84	6477.62	0.774016	-0.369564	0.222047	0.484092
FBgn0002645	Map205	19859.6	16175.6	23543.6	1.4555	0.541512	0.249122	0.51962
FBgn0002652	squ	0	0	0	NA	NA	NA	NA
FBgn0002673	twe	378.929	324.314	433.543	1.3368	0.418787	0.269427	0.542309
FBgn0002707	mei-9	1493.13	1267.84	1718.41	1.35538	0.438696	0.0806531	0.248474
FBgn0002709	mei-218	80.4761	48.9664	111.986	2.28699	1.19345	0.196516	0.44913
FBgn0002715	mei-S332	824.739	728.039	921.438	1.26564	0.339873	0.112486	0.311781
FBgn0002716	mei-W68	0	0	0	NA	NA	NA	NA
FBgn0002719	Men	1325.55	1053.89	1597.21	1.51553	0.599826	0.0375135	0.144891
FBgn0002723	Met	808.118	787.065	829.171	1.0535	0.0751875	0.960619	1
FBgn0002732	malpha	2992.44	4363.49	1621.38	0.371579	-1.42826	0.0191199	0.0885867
FBgn0002733	HLHmbeta	4307.21	3748.28	4866.15	1.29823	0.37655	0.602282	0.839988
FBgn0002734	HLHmdelta	457.99	746.767	169.212	0.226592	-2.14183	7.96389e-09	2.19987e-07
FBgn0002735	HLHmgamma	814.507	210.549	1418.46	6.73698	2.7521	4.43131e-18	3.56941e-16
FBgn0002736	mago	4102.91	4219.36	3986.46	0.944803	-0.0819141	0.976763	1
FBgn0002772	Mlc1	28.2861	45.2877	11.2845	0.249173	-2.00478	0.330512	0.608757
FBgn0002773	Mlc2	891.051	476.124	1305.98	2.74294	1.45572	0.010606	0.0573973
FBgn0002774	mle	4308.68	4624.44	3992.91	0.863437	-0.211837	0.380512	0.656717
FBgn0002775	msl-3	1500.61	1487.75	1513.46	1.01728	0.0247176	0.888025	1
FBgn0002778	mnd	2214.2	2443.87	1984.54	0.812047	-0.300365	0.535159	0.789061
FBgn0002780	mod	29304.3	26490.4	32118.1	1.21244	0.277914	0.14382	0.368703
FBgn0002781	mod(mdg4)	22632.4	24374.8	20890.1	0.857038	-0.222569	0.311268	0.590843
FBgn0002783	mor	12961.7	14882.5	11041	0.741875	-0.430752	0.0224803	0.0995436
FBgn0002787	Mov34	7024.15	7955.18	6093.12	0.765932	-0.384712	0.0686042	0.220907
FBgn0002789	Mp20	27.9926	53.7005	2.28473	0.0425459	-4.55484	0.0131966	0.0675319
FBgn0002791	mr	2208.56	2135.66	2281.46	1.06827	0.0952709	0.507665	0.766833
FBgn0002838	ms(3)K81	10.8872	0.967137	20.8072	21.5142	4.42722	0.0365536	0.14212
FBgn0002842	sa	0	0	0	NA	NA	NA	NA
FBgn0002855	Acp26Aa	0	0	0	NA	NA	NA	NA
FBgn0002856	Acp26Ab	0	0	0	NA	NA	NA	NA
FBgn0002862	Mst87F	1.93593	0	3.87186	Inf	Inf	0.274943	0.549366
FBgn0002863	Acp95EF	0	0	0	NA	NA	NA	NA
FBgn0002865	Mst98Ca	0	0	0	NA	NA	NA	NA
FBgn0002868	MtnA	260.209	205.17	315.248	1.53652	0.61967	0.614151	0.847708
FBgn0002869	MtnB	0.693266	0.688921	0.697611	1.01261	0.0180831	1	1
FBgn0002872	mu2	2587.94	2323.02	2852.87	1.22809	0.296415	0.251842	0.523427
FBgn0002873	mud	7963.53	7899.94	8027.12	1.0161	0.0230411	0.945337	1
FBgn0002878	mus101	1683.2	1520.64	1845.76	1.21381	0.279538	0.182474	0.429695
FBgn0002887	mus201	0	0	0	NA	NA	NA	NA
FBgn0002891	mus205	1796.71	1387.72	2205.69	1.58943	0.668511	0.00166256	0.0128147
FBgn0002899	mus301	1267.47	1112.59	1422.35	1.27841	0.354353	0.0966869	0.280528
FBgn0002901	mus304	677.558	768.632	586.484	0.763023	-0.390202	0.0732275	0.231415
FBgn0002905	mus308	1641.93	1438.99	1844.88	1.28207	0.358471	0.160078	0.394652
FBgn0002906	mus309	1504.75	1313.34	1696.16	1.29149	0.369034	0.151136	0.380799
FBgn0002909	mus312	0	0	0	NA	NA	NA	NA
FBgn0002914	Myb	8450.25	8061.98	8838.52	1.09632	0.132671	0.563982	0.811411
FBgn0002917	na	74.2254	21.149	127.302	6.01929	2.58959	2.12004e-13	1.10746e-11
FBgn0002921	Atpalpha	22951.5	28912.4	16990.5	0.587654	-0.766961	0.00017032	0.00189181
FBgn0002922	nau	15.0528	29.809	0.296504	0.00994679	-6.65155	0.000156454	0.00174884
FBgn0002924	ncd	5660.91	4954.21	6367.61	1.28529	0.362099	0.153477	0.384493
FBgn0002926	ndl	1.65665	0.644758	2.66854	4.13882	2.04922	0.564013	0.811411
FBgn0002930	nec	0	0	0	NA	NA	NA	NA
FBgn0002931	net	1276.32	978.222	1574.42	1.60947	0.68659	0.0370492	0.143465
FBgn0002932	neur	851.338	518.165	1184.51	2.28597	1.19281	5.81072e-06	9.65586e-05
FBgn0002933	ng1	0	0	0	NA	NA	NA	NA
FBgn0002936	ninaA	0	0	0	NA	NA	NA	NA
FBgn0002937	ninaB	0.344461	0.688921	0	0	#NAME?	0.998572	1
FBgn0002938	ninaC	60.876	88.5616	33.1904	0.374772	-1.41592	0.017048	0.0816942
FBgn0002939	ninaD	0.348805	0	0.697611	Inf	Inf	0.994859	1
FBgn0002940	ninaE	0.161189	0.322379	0	0	#NAME?	0.987798	1
FBgn0002941	slou	1.15475	1.61189	0.697611	0.432789	-1.20826	0.529028	0.783482
FBgn0002945	nkd	10239.5	10077.3	10401.8	1.0322	0.0457217	0.968591	1
FBgn0002948	nod	1058.58	1169.4	947.753	0.810462	-0.303184	0.141163	0.365444
FBgn0002962	nos	0	0	0	NA	NA	NA	NA
FBgn0002968	Nrg	24376.2	19172.3	29580.2	1.54286	0.625611	0.085623	0.257699
FBgn0002973	numb	5729.81	7564.72	3894.9	0.514877	-0.957701	1.13828e-05	0.000174074
FBgn0002985	odd	497.726	436.506	558.946	1.2805	0.356706	0.131102	0.3468
FBgn0002989	okr	713.647	659.08	768.213	1.16558	0.221053	0.631506	0.85954
FBgn0003002	opa	573.048	812.171	333.924	0.41115	-1.28226	8.68129e-07	1.73823e-05
FBgn0003008	or	1045.12	979.393	1110.85	1.13422	0.181698	0.288949	0.563896
FBgn0003009	ord	7.74372	0	15.4874	Inf	Inf	0.0430996	0.160249
FBgn0003011	ort	9.75121	7.50304	11.9994	1.59927	0.677412	0.747014	0.930637
FBgn0003015	osk	0.348805	0	0.697611	Inf	Inf	0.990147	1
FBgn0003016	osp	1875.26	2269.42	1481.1	0.652635	-0.615653	0.198565	0.452539
FBgn0003022	Ote	3910.49	3527.57	4293.4	1.2171	0.283446	0.312708	0.59152
FBgn0003023	otu	12.7578	3.0339	22.4816	7.41014	2.8895	0.0226069	0.0998943
FBgn0003028	ovo	6833.76	10199.3	3468.19	0.340042	-1.55622	0.00139149	0.0111067
FBgn0003034	Acp70A	0	0	0	NA	NA	NA	NA
FBgn0003041	pbl	5564.82	5072.57	6057.07	1.19408	0.255904	0.178492	0.424008
FBgn0003042	Pc	1181.86	1068.72	1295.01	1.21173	0.277071	0.156917	0.389323
FBgn0003044	Pcl	4190.2	4459.15	3921.25	0.879371	-0.185457	0.39199	0.666675
FBgn0003046	Pcp	0	0	0	NA	NA	NA	NA
FBgn0003048	pcx	3060.71	3139.72	2981.69	0.949668	-0.0745056	0.877866	0.99884
FBgn0003053	peb	4290.98	352.71	8229.25	23.3315	4.54421	2.27906e-48	1.60324e-45
FBgn0003057	CG10598	0	0	0	NA	NA	NA	NA
FBgn0003060	CG9757	0	0	0	NA	NA	NA	NA
FBgn0003062	Fib	12637.8	10724.3	14551.2	1.35684	0.440252	0.0818853	0.249871
FBgn0003065	CG2150	1.93427	3.86855	0	0	#NAME?	0.107202	0.300611
FBgn0003067	Pepck	5285.44	5056.75	5514.13	1.09045	0.124923	0.948262	1
FBgn0003068	per	18.9665	7.81219	30.1207	3.85561	1.94696	0.0122929	0.0638672
FBgn0003071	Pfk	4133.75	4164.34	4103.17	0.985309	-0.0213514	0.820327	0.970025
FBgn0003074	Pgi	4083.61	4294.37	3872.84	0.901842	-0.149053	0.362156	0.640277
FBgn0003076	Pgm	837.674	910.324	765.024	0.840386	-0.250876	0.359097	0.638116
FBgn0003079	phl	1985.33	2272.03	1698.63	0.747627	-0.41961	0.0323785	0.130056
FBgn0003082	phr	1236.97	880.281	1593.66	1.8104	0.856306	0.000196618	0.00211705
FBgn0003086	Pig1	0	0	0	NA	NA	NA	NA
FBgn0003087	pim	1663.07	1495.82	1830.32	1.22362	0.291159	0.152687	0.383425
FBgn0003089	pip	414.603	792.44	36.7657	0.0463956	-4.42987	2.33378e-21	2.56522e-19
FBgn0003090	pk	2758.29	4595.5	921.07	0.200429	-2.31884	1.0968e-10	3.89678e-09
FBgn0003091	Pkc53E	9.46597	18.2343	0.697611	0.0382581	-4.70809	0.183757	0.431464
FBgn0003093	Pkc98E	2239.76	2683.32	1796.2	0.669395	-0.57907	0.019113	0.0885867
FBgn0003114	plu	1.51695	3.0339	0	0	#NAME?	0.693266	0.896378
FBgn0003116	pn	199.987	138.588	261.385	1.88606	0.915378	0.0118339	0.0621869
FBgn0003117	pnr	1151.35	1877.06	425.643	0.226761	-2.14076	0.000102417	0.00121155
FBgn0003118	pnt	2879.52	1910.99	3848.05	2.01365	1.00981	4.62239e-05	0.000604405
FBgn0003124	polo	15160.9	14769	15552.7	1.05307	0.0745962	0.740657	0.926765
FBgn0003129	Poxm	36.4587	8.64683	64.2706	7.43285	2.89392	0.000195525	0.00211174
FBgn0003130	Poxn	420.004	508.578	331.43	0.651679	-0.617766	0.047042	0.17022
FBgn0003132	Pp1-13C	0	0	0	NA	NA	NA	NA
FBgn0003134	Pp1alpha-96A	3410.73	2761.46	4059.99	1.47023	0.556045	0.0111826	0.0596554
FBgn0003137	Ppn	20026.3	22084.9	17967.8	0.813578	-0.297647	0.540631	0.792655
FBgn0003138	Ptp61F	8836.66	6756.39	10916.9	1.61579	0.692241	0.00335575	0.0229339
FBgn0003139	PpV	2649.6	2228.18	3071.02	1.37827	0.462854	0.0330366	0.131896
FBgn0003140	PpY-55A	0	0	0	NA	NA	NA	NA
FBgn0003141	pr	2025.49	2112.84	1938.13	0.917309	-0.124521	0.544332	0.794999
FBgn0003145	prd	30.0979	0.322379	59.8734	185.724	7.53701	0.0579026	0.19627
FBgn0003149	Prm	33.2811	65.6727	0.889513	0.0135446	-6.20613	0.00556477	0.0341194
FBgn0003159	ptr	253.047	444.755	61.3394	0.137917	-2.85813	1.13055e-20	1.15821e-18
FBgn0003162	Pu	167.57	148.348	186.792	1.25915	0.332453	0.27111	0.544181
FBgn0003165	pum	10432.9	12350.2	8515.66	0.689514	-0.536348	0.16589	0.4047
FBgn0003169	put	5055.36	5573.74	4536.99	0.813994	-0.29691	0.157307	0.389923
FBgn0003174	pwn	2602.18	3279.51	1924.84	0.586931	-0.768738	7.93404e-05	0.000965629
FBgn0003175	px	3529.73	3353.07	3706.39	1.10537	0.144531	0.735563	0.923568
FBgn0003178	PyK	10183.3	8689.69	11676.8	1.34376	0.426272	0.0457658	0.166521
FBgn0003187	qua	45.4146	7.72386	83.1053	10.7596	3.42755	0.0005488	0.00511947
FBgn0003189	r	7974.97	6605.33	9344.61	1.41471	0.500503	0.209146	0.467456
FBgn0003204	ras	6723.85	6674.91	6772.79	1.01466	0.0210028	0.923495	1
FBgn0003205	Ras85D	8081.72	8612.09	7551.35	0.87683	-0.18963	0.500298	0.761654
FBgn0003206	Ras64B	2957.83	2766.88	3148.79	1.13803	0.186538	0.32096	0.597946
FBgn0003209	raw	3509.28	2909.12	4109.45	1.41261	0.498362	0.0291579	0.119904
FBgn0003210	rb	0	0	0	NA	NA	NA	NA
FBgn0003218	rdgB	582.662	444.283	721.04	1.62293	0.6986	0.00245161	0.0177674
FBgn0003227	rec	725.181	582.818	867.544	1.48853	0.573892	0.0196923	0.0903448
FBgn0003231	ref(2)P	3436.4	3221.98	3650.81	1.13309	0.180268	0.593123	0.83396
FBgn0003248	Rh2	2.27873	4.55747	0	0	#NAME?	0.20828	0.466217
FBgn0003249	Rh3	0	0	0	NA	NA	NA	NA
FBgn0003250	Rh4	0	0	0	NA	NA	NA	NA
FBgn0003254	rib	661.46	6.99078	1315.93	188.238	7.55641	1.48389e-55	1.95726e-52
FBgn0003255	rk	110.356	195.283	25.4294	0.130218	-2.941	3.23397e-06	5.74492e-05
FBgn0003256	rl	2663.62	2627.83	2699.41	1.02724	0.038767	0.381421	0.657527
FBgn0003257	r-l	3036.05	2677.19	3394.92	1.26809	0.342658	0.124996	0.335102
FBgn0003261	Rm62	98039	73138.3	122940	1.68092	0.749253	0.000431038	0.00418814
FBgn0003267	ro	0	0	0	NA	NA	NA	NA
FBgn0003268	rod	5720.35	5092.56	6348.15	1.24655	0.317946	0.13364	0.351563
FBgn0003270	amos	0	0	0	NA	NA	NA	NA
FBgn0003274	RpLP2	98545.7	80777	116314	1.43994	0.526012	0.0200082	0.0913571
FBgn0003275	RpII18	3765.65	3556.52	3974.78	1.11761	0.160411	0.525491	0.780214
FBgn0003277	RpII215	10246.6	10662	9831.12	0.922071	-0.11705	0.617086	0.849287
FBgn0003278	RpI135	2825.41	2409.43	3241.38	1.34529	0.427914	0.063901	0.209967
FBgn0003279	RpL4	87601.7	72138.7	103065	1.4287	0.514706	0.0119794	0.0626393
FBgn0003285	rst	0	0	0	NA	NA	NA	NA
FBgn0003292	rt	1161.37	1317.06	1005.68	0.763577	-0.389154	0.418547	0.692459
FBgn0003295	ru	0	0	0	NA	NA	NA	NA
FBgn0003300	run	1.66475	1.93427	1.39522	0.721315	-0.471298	0.77406	0.944922
FBgn0003301	rut	2357.54	3138.52	1576.56	0.502326	-0.993304	0.00848783	0.0480714
FBgn0003302	rux	508.383	572.652	444.114	0.775539	-0.366729	0.257096	0.527798
FBgn0003308	ry	656.109	768.407	543.811	0.707712	-0.498765	0.447272	0.717812
FBgn0003310	S	3452.28	3429.74	3474.82	1.01314	0.0188396	0.804704	0.960764
FBgn0003312	sad	44.9287	83.8054	6.05199	0.0722148	-3.79156	1.06341e-07	2.44468e-06
FBgn0003313	sala	0	0	0	NA	NA	NA	NA
FBgn0003317	sax	3015.44	2983.26	3047.62	1.02157	0.0307925	0.663579	0.879327
FBgn0003319	Sb	1528.8	2994.53	63.0657	0.0210603	-5.56933	2.36339e-19	2.13149e-17
FBgn0003321	sbr	4968.33	5085.81	4850.85	0.9538	-0.0682412	0.939619	1
FBgn0003326	sca	2083.71	2977.67	1189.74	0.399555	-1.32353	0.00427697	0.0277215
FBgn0003328	scb	4591.55	2893.65	6289.45	2.17353	1.12004	3.0675e-06	5.47687e-05
FBgn0003330	Sce	1591.38	1667.44	1515.32	0.908768	-0.138015	0.616257	0.849059
FBgn0003334	Scm	3233.44	3412.09	3054.78	0.895282	-0.159586	0.424438	0.698918
FBgn0003339	Scr	951.498	29.6059	1873.39	63.2775	5.98362	1.49107e-59	3.93344e-56
FBgn0003345	sd	16510.1	20357.8	12662.5	0.621998	-0.685017	0.00132883	0.0107612
FBgn0003346	RanGap	7597.06	8040.79	7153.34	0.889632	-0.16872	0.409494	0.683705
FBgn0003353	sei	648.203	609.814	686.592	1.1259	0.171084	0.566734	0.813298
FBgn0003356	Jon99Cii	11.8892	22.8889	0.889513	0.0388622	-4.68549	0.450561	0.720905
FBgn0003357	Jon99Ciii	145.643	237.916	53.3708	0.224326	-2.15633	0.629222	0.858156
FBgn0003358	Jon99Ci	2.97204	3.86855	2.07553	0.536514	-0.898313	0.649876	0.869908
FBgn0003360	sesB	0.348805	0	0.697611	Inf	Inf	0.996567	1
FBgn0003366	sev	5.17787	9.65813	0.697611	0.0722304	-3.79125	0.00504747	0.0316276
FBgn0003371	sgg	16283.1	15408	17158.1	1.11359	0.155217	0.513475	0.77143
FBgn0003372	Sgs1	1.3688	0.644758	2.09283	3.24592	1.69863	1	1
FBgn0003373	Sgs3	7.00624	14.0125	0	0	#NAME?	0.0346319	0.136509
FBgn0003374	Sgs4	0	0	0	NA	NA	NA	NA
FBgn0003375	Sgs5	16.8896	33.7792	0	0	#NAME?	0.0031703	0.0218504
FBgn0003377	Sgs7	4.71204	9.42408	0	0	#NAME?	0.0457671	0.166521
FBgn0003378	Sgs8	4.11806	8.23613	0	0	#NAME?	0.0149739	0.0741805
FBgn0003380	Sh	20.7496	15.3903	26.1089	1.69645	0.762518	0.219007	0.480748
FBgn0003382	sha	16.6	30.4096	2.79044	0.0917618	-3.44596	0.00920638	0.0512102
FBgn0003386	Shaw	1.04642	0	2.09283	Inf	Inf	0.396821	0.671534
FBgn0003388	shd	39.1008	73.423	4.77867	0.0650842	-3.94155	1.10151e-06	2.15642e-05
FBgn0003390	shf	2285.94	4279.16	292.73	0.0684083	-3.86969	1.36395e-52	1.24365e-49
FBgn0003391	shg	14006	17914.8	10097.3	0.563628	-0.827185	0.000507806	0.00477829
FBgn0003392	shi	6708.61	7354.88	6062.35	0.824262	-0.278825	0.227498	0.491414
FBgn0003396	shn	6185.45	6878.96	5491.94	0.798368	-0.324874	0.332129	0.609761
FBgn0003401	shu	811.31	500.602	1122.02	2.24134	1.16436	1.13068e-05	0.000173163
FBgn0003410	sina	0	0	0	NA	NA	NA	NA
FBgn0003411	sisA	0.322379	0.644758	0	0	#NAME?	0.918253	1
FBgn0003415	skd	7224.62	8084.22	6365.02	0.787338	-0.344945	0.14913	0.378182
FBgn0003416	sl	1962.27	1842.93	2081.61	1.12951	0.175693	0.573538	0.817685
FBgn0003423	slgA	4622.29	5137.68	4106.9	0.799368	-0.323069	0.152171	0.382675
FBgn0003425	sli	4820.75	6553.25	3088.26	0.471256	-1.08542	0.0091396	0.0508924
FBgn0003429	slo	4.42478	6.75672	2.09283	0.309741	-1.69087	0.208322	0.466217
FBgn0003430	slp1	42.0737	17.1744	66.973	3.89958	1.96332	0.100633	0.288319
FBgn0003435	sm	835.624	1110.15	561.101	0.505429	-0.984419	0.673361	0.884625
FBgn0003444	smo	4528.57	4964.7	4092.43	0.824306	-0.278748	0.197425	0.450622
FBgn0003447	sn	11131.1	14702.4	7559.83	0.51419	-0.959626	2.15894e-05	0.000308688
FBgn0003448	sna	0.344461	0.688921	0	0	#NAME?	0.990473	1
FBgn0003449	snf	4017.02	4079.57	3954.48	0.96934	-0.0449257	0.711068	0.908816
FBgn0003450	snk	0.322379	0.644758	0	0	#NAME?	0.873538	0.995956
FBgn0003459	stwl	1696.25	1368.05	2024.46	1.47982	0.56542	0.018293	0.0860578
FBgn0003460	so	562.823	728.728	396.918	0.544672	-0.87654	0.00989401	0.054119
FBgn0003462	Sod	5948.93	6748.4	5149.46	0.763064	-0.390124	0.0673513	0.217803
FBgn0003463	sog	2917.34	3439.35	2395.34	0.696453	-0.521902	0.142535	0.367914
FBgn0003464	sol	5072.34	4082.24	6062.44	1.48508	0.570537	0.0231935	0.101679
FBgn0003475	spir	850.122	510.185	1190.06	2.3326	1.22194	0.0575431	0.195365
FBgn0003479	spn-A	724.564	729.063	720.066	0.987659	-0.0179156	0.878314	0.998918
FBgn0003480	spn-B	218.232	158.403	278.06	1.7554	0.811797	0.00484582	0.0306476
FBgn0003482	spn-D	125.056	72.0054	178.106	2.47351	1.30656	0.00143922	0.0114014
FBgn0003483	spn-E	457.866	230.099	685.632	2.97972	1.57518	3.19691e-06	5.68866e-05
FBgn0003486	spo	1.36011	2.0226	0.697611	0.344908	-1.53572	0.68211	0.889391
FBgn0003495	spz	323.228	88.2569	558.199	6.3247	2.661	1.30461e-05	0.000195266
FBgn0003499	sr	492.142	822.955	161.329	0.196036	-2.35081	8.02565e-05	0.000975652
FBgn0003502	Btk29A	7696.91	8541.81	6852.02	0.802174	-0.318012	0.115142	0.316979
FBgn0003507	srp	266.509	93.649	439.369	4.69166	2.2301	4.39557e-06	7.46893e-05
FBgn0003510	Sry-alpha	226.294	263.075	189.513	0.720378	-0.473173	0.232199	0.497056
FBgn0003511	Sry-beta	820.229	934.123	706.334	0.756147	-0.403261	0.0521645	0.182628
FBgn0003512	Sry-delta	1806.08	1861.15	1751.01	0.940823	-0.0880051	0.701882	0.902737
FBgn0003513	ss	1094.18	1437.05	751.304	0.522809	-0.935644	0.00494104	0.0310714
FBgn0003514	sqh	10501.7	8224	12779.4	1.55391	0.635905	0.00148526	0.0117046
FBgn0003515	st	0	0	0	NA	NA	NA	NA
FBgn0003517	sta	109149	95792.8	122506	1.27887	0.354865	0.0641124	0.21049
FBgn0003520	stau	5728.02	5556.71	5899.33	1.06166	0.0863212	0.980984	1
FBgn0003525	stg	5589.74	5548.74	5630.73	1.01478	0.0211607	0.923594	1
FBgn0003527	stil	18.4305	26.8325	10.0284	0.373742	-1.41989	0.0549883	0.189344
FBgn0003545	sub	2458.88	2089.09	2828.67	1.35402	0.437248	0.0443095	0.162854
FBgn0003557	Su(dx)	3282.63	3627.55	2937.7	0.809828	-0.304312	0.187188	0.436124
FBgn0003559	su(f)	3517.09	3557.13	3477.04	0.977483	-0.032857	0.889609	1
FBgn0003567	su(Hw)	5452.03	5511.01	5393.06	0.978597	-0.0312134	0.892714	1
FBgn0003575	su(s)	3729.97	3687.14	3772.8	1.02323	0.0331334	0.816394	0.967321
FBgn0003598	Su(var)3-7	3777.84	4320.25	3235.42	0.748896	-0.417163	0.0151082	0.0747755
FBgn0003607	Su(var)205	18404.4	18877	17931.8	0.949925	-0.0741152	0.831039	0.975431
FBgn0003612	Su(var)2-10	5769.69	6159.41	5379.98	0.873458	-0.195191	0.304833	0.583456
FBgn0003638	su(w[a])	9495.94	10164.6	8827.22	0.868424	-0.203529	0.42798	0.70234
FBgn0003651	svp	669.871	1221.49	118.251	0.0968087	-3.36872	5.62421e-16	3.82882e-14
FBgn0003654	sw	1762.59	1852.89	1672.29	0.902532	-0.147951	0.595088	0.835176
FBgn0003655	swa	0.348805	0	0.697611	Inf	Inf	1	1
FBgn0003656	sws	1632.39	1380.8	1883.99	1.36442	0.448291	0.0817681	0.249853
FBgn0003659	Sxl	0	0	0	NA	NA	NA	NA
FBgn0003660	Syb	0	0	0	NA	NA	NA	NA
FBgn0003676	T-cp1	11679.4	11617.4	11741.4	1.01067	0.0153158	0.881852	1
FBgn0003683	term	0	0	0	NA	NA	NA	NA
FBgn0003687	Tbp	1206.28	1176.54	1236.02	1.05055	0.0711501	0.764358	0.939451
FBgn0003701	thr	1877.22	1491.12	2263.32	1.51786	0.602041	0.0162721	0.0789441
FBgn0003710	tipE	0.322379	0.644758	0	0	#NAME?	0.66706	0.881039
FBgn0003714	tko	1279.66	1283.2	1276.13	0.99449	-0.00797136	0.750747	0.931844
FBgn0003715	CG16778	118.321	4.19093	232.451	55.4652	5.79351	9.71389e-11	3.48643e-09
FBgn0003716	tkv	12081.1	19038.6	5123.55	0.269113	-1.89372	1.37323e-18	1.14097e-16
FBgn0003719	tld	1734.41	2287.37	1181.44	0.516507	-0.953141	6.25484e-06	0.000103288
FBgn0003720	tll	2.06676	4.13353	0	0	#NAME?	0.591802	0.832881
FBgn0003721	Tm1	27285.9	28834.8	25737.1	0.892572	-0.163959	0.502939	0.763251
FBgn0003731	Egfr	9717.15	14915.5	4518.78	0.302958	-1.72281	1.79709e-15	1.17055e-13
FBgn0003732	Top2	31192.9	28619.7	33766	1.17982	0.238563	0.306506	0.585173
FBgn0003733	tor	27.2157	29.8223	24.6091	0.82519	-0.277201	0.615855	0.849059
FBgn0003741	tra	681.688	663.965	699.411	1.05339	0.075034	0.897532	1
FBgn0003742	tra2	2199.61	2064.97	2334.26	1.13041	0.176846	0.436814	0.710394
FBgn0003744	trc	2973.24	3532.73	2413.75	0.683253	-0.549508	0.00177266	0.0135153
FBgn0003747	Gr5a	7.84209	10.7136	4.97057	0.46395	-1.10796	0.331016	0.609153
FBgn0003748	Treh	1914.06	2098	1730.12	0.824655	-0.278137	0.463101	0.731058
FBgn0003751	trk	28.8773	6.39018	51.3644	8.03803	3.00684	0.0120473	0.0629177
FBgn0003861	trp	0.644758	1.28952	0	0	#NAME?	0.783061	0.949321
FBgn0003862	trx	10066.8	12856.6	7276.95	0.566007	-0.821108	0.0206313	0.0933539
FBgn0003863	alphaTry	13.0563	26.1127	0	0	#NAME?	0.442166	0.714071
FBgn0003865	tsg	1.63398	3.26795	0	0	#NAME?	0.143237	0.368454
FBgn0003866	tsh	8046.01	13454.5	2637.49	0.19603	-2.35085	5.65352e-26	9.62192e-24
FBgn0003867	tsl	2089.73	2275.29	1904.17	0.83689	-0.256889	0.214257	0.474766
FBgn0003870	ttk	8506.62	10873.8	6139.46	0.564611	-0.824671	0.000124691	0.0014286
FBgn0003882	tub	2704.38	2478.31	2930.45	1.18244	0.241764	0.36951	0.645666
FBgn0003884	alphaTub84B	130509	136239	124780	0.915887	-0.126758	0.688834	0.89341
FBgn0003885	alphaTub84D	7672.28	8138.6	7205.96	0.885406	-0.17559	0.647424	0.868941
FBgn0003886	alphaTub85E	45.1631	40.2886	50.0376	1.24198	0.312642	0.924226	1
FBgn0003887	betaTub56D	117550	132676	102424	0.771985	-0.373354	0.0846092	0.255523
FBgn0003888	betaTub60D	16786.9	13744.4	19829.4	1.44273	0.528797	0.156958	0.389333
FBgn0003889	betaTub85D	1.71326	1.33368	2.09283	1.56922	0.650045	1	1
FBgn0003890	betaTub97EF	209.143	369.208	49.0781	0.132928	-2.91128	1.21052e-06	2.33517e-05
FBgn0003891	tud	16218	16426.8	16009.2	0.97458	-0.0371479	0.775098	0.945314
FBgn0003892	ptc	10178.8	6597.26	13760.2	2.08575	1.06057	0.00100159	0.00850262
FBgn0003896	tup	1967.53	2036.55	1898.52	0.932222	-0.101254	0.863636	0.992266
FBgn0003900	twi	624.412	1031.48	217.347	0.210714	-2.24664	1.72272e-11	6.85969e-10
FBgn0003916	snRNA:U1:21D	0	0	0	NA	NA	NA	NA
FBgn0003920	snRNA:U2:14B	0	0	0	NA	NA	NA	NA
FBgn0003922	snRNA:U2:38ABa	0	0	0	NA	NA	NA	NA
FBgn0003923	snRNA:U2:38ABb	0	0	0	NA	NA	NA	NA
FBgn0003926	snRNA:U3:22A	0	0	0	NA	NA	NA	NA
FBgn0003930	snRNA:U4:39B	0	0	0	NA	NA	NA	NA
FBgn0003931	snRNA:U4:38AB	0	0	0	NA	NA	NA	NA
FBgn0003933	snRNA:U5:14B	0.348805	0	0.697611	Inf	Inf	0.989617	1
FBgn0003934	snRNA:U5:23D	0	0	0	NA	NA	NA	NA
FBgn0003935	snRNA:U5:34A	11.2672	0	22.5343	Inf	Inf	0.395201	0.669797
FBgn0003936	snRNA:U5:35D	0	0	0	NA	NA	NA	NA
FBgn0003938	snRNA:U5:63BC	2.19738	1.0113	3.38345	3.34564	1.74228	0.603654	0.84067
FBgn0003941	RpL40	53551.3	44304.1	62798.5	1.41744	0.50329	0.00752743	0.0439322
FBgn0003942	RpS27A	89501.2	74090.7	104912	1.41599	0.501809	0.0164874	0.0795395
FBgn0003943	Ubi-p63E	4405.5	4193.91	4617.09	1.1009	0.138686	0.578654	0.821466
FBgn0003944	Ubx	384.143	415.68	352.606	0.848263	-0.237417	0.851645	0.986126
FBgn0003950	unc	220.38	116.847	323.912	2.77211	1.47098	0.000100277	0.0011889
FBgn0003961	Uro	4.51331	9.02661	0	0	#NAME?	0.528338	0.782789
FBgn0003963	ush	2727.65	3554.89	1900.41	0.534591	-0.903493	6.38473e-05	0.000802999
FBgn0003964	usp	0	0	0	NA	NA	NA	NA
FBgn0003965	v	0.644758	1.28952	0	0	#NAME?	0.471712	0.737081
FBgn0003969	vap	5195.92	5918.09	4473.76	0.755946	-0.403645	0.0943109	0.276589
FBgn0003975	vg	5757.81	9251.81	2263.81	0.244689	-2.03098	2.98544e-11	1.14972e-09
FBgn0003977	vir	2706.9	2919.52	2494.29	0.854348	-0.227104	0.237258	0.504384
FBgn0003978	vls	949.173	930.246	968.1	1.04069	0.0575448	0.955021	1
FBgn0003979	Vm26Aa	0	0	0	NA	NA	NA	NA
FBgn0003980	Vm26Ab	0.161189	0.322379	0	0	#NAME?	0.992962	1
FBgn0003983	Vm34Ca	8.11275	8.691	7.53451	0.866933	-0.206008	1	1
FBgn0003984	vn	5172.39	3719.3	6625.48	1.78138	0.832995	6.73997e-05	0.000841658
FBgn0003996	w	0	0	0	NA	NA	NA	NA
FBgn0003997	W	3178.49	4103.03	2253.95	0.549337	-0.864235	0.000245826	0.00258105
FBgn0004003	wbl	2158.9	3748.64	569.154	0.151829	-2.71948	0.000415922	0.00406748
FBgn0004009	wg	5272.93	4235.93	6309.93	1.48962	0.574945	0.0080645	0.046223
FBgn0004028	wupA	57.384	104.164	10.6042	0.101803	-3.29615	0.0214076	0.0960431
FBgn0004034	y	0	0	0	NA	NA	NA	NA
FBgn0004045	Yp1	2.05337	2.71152	1.39522	0.514553	-0.958609	0.67079	0.88266
FBgn0004047	Yp3	16.9317	25.6314	8.23212	0.321174	-1.63857	0.104425	0.29494
FBgn0004049	yrt	5164.76	6081.96	4247.56	0.698387	-0.517902	0.0134006	0.0682779
FBgn0004050	z	0	0	0	NA	NA	NA	NA
FBgn0004052	Z600	0.344461	0.688921	0	0	#NAME?	1	1
FBgn0004053	zen	0.483568	0.967137	0	0	#NAME?	0.944812	1
FBgn0004054	zen2	2.37203	0	4.74407	Inf	Inf	0.564256	0.811411
FBgn0004055	uzip	3954.14	2621.41	5286.87	2.0168	1.01207	1.5059e-06	2.82835e-05
FBgn0004057	Zw	1433.33	1181.72	1684.93	1.42582	0.511794	0.0334967	0.133322
FBgn0004066	Pros28.1	8322.27	8920.86	7723.68	0.8658	-0.207894	0.390332	0.664963
FBgn0004087	Dhfr	2061.29	1783.44	2339.14	1.31159	0.391314	0.0345392	0.136297
FBgn0004101	bs	3947.87	6739.27	1156.46	0.171601	-2.54287	1.16289e-29	2.50425e-27
FBgn0004102	oc	561.32	10.3912	1112.25	107.037	6.74197	7.01315e-05	0.000869597
FBgn0004103	Pp1-87B	21910.6	23209.6	20611.6	0.888065	-0.171262	0.384014	0.65965
FBgn0004106	cdc2	6133.94	6491.93	5775.95	0.889713	-0.168589	0.712602	0.909492
FBgn0004107	cdc2c	1925.34	2030.96	1819.72	0.895993	-0.158441	0.77451	0.944922
FBgn0004108	Nrt	3219.58	3240.05	3199.11	0.987363	-0.0183473	0.723846	0.916127
FBgn0004110	tin	55.1339	3.07806	107.19	34.8238	5.122	0.0327541	0.131102
FBgn0004117	Tm2	57.903	110.731	5.07518	0.0458335	-4.44745	0.00360423	0.0241874
FBgn0004118	nAcRbeta-96A	14.5231	18.1283	10.918	0.60226	-0.731541	0.504284	0.764102
FBgn0004132	boca	2144.11	2448.9	1839.32	0.751081	-0.412959	0.141835	0.366644
FBgn0004133	blow	10160.3	5247.73	15072.8	2.87225	1.52218	8.28754e-09	2.28329e-07
FBgn0004143	nullo	0	0	0	NA	NA	NA	NA
FBgn0004167	kst	19689.5	20256.7	19122.3	0.944	-0.083142	0.748158	0.930687
FBgn0004168	5-HT1A	3.95477	2.06676	5.84278	2.82702	1.49928	0.199198	0.453504
FBgn0004169	up	100.336	179.534	21.1383	0.11774	-3.08633	0.0634688	0.209253
FBgn0004170	sc	0	0	0	NA	NA	NA	NA
FBgn0004171	Mst98Cb	0	0	0	NA	NA	NA	NA
FBgn0004172	Mst84Da	0	0	0	NA	NA	NA	NA
FBgn0004173	Mst84Db	0	0	0	NA	NA	NA	NA
FBgn0004174	Mst84Dc	0	0	0	NA	NA	NA	NA
FBgn0004175	Mst84Dd	0.644758	1.28952	0	0	#NAME?	0.906118	1
FBgn0004177	mts	30902	32510.2	29293.7	0.901063	-0.1503	0.547955	0.797649
FBgn0004179	Csp	6849.71	7279.01	6420.41	0.882044	-0.181077	0.384979	0.660113
FBgn0004181	Peb	0	0	0	NA	NA	NA	NA
FBgn0004183	snRNA:U1:82Eb	0	0	0	NA	NA	NA	NA
FBgn0004185	snRNA:U1:95Ca	0	0	0	NA	NA	NA	NA
FBgn0004186	snRNA:U1:95Cb	0	0	0	NA	NA	NA	NA
FBgn0004187	snRNA:U1:95Cc	0	0	0	NA	NA	NA	NA
FBgn0004188	snRNA:U6:96Aa	0	0	0	NA	NA	NA	NA
FBgn0004189	snRNA:U6:96Ab	5.63358	0	11.2672	Inf	Inf	0.225729	0.489076
FBgn0004190	snRNA:U6:96Ac	0	0	0	NA	NA	NA	NA
FBgn0004191	snRNA:U2:34ABa	1.18118	0.967137	1.39522	1.44263	0.528702	0.967602	1
FBgn0004192	snRNA:U2:34ABb	0	0	0	NA	NA	NA	NA
FBgn0004197	Ser	7877.42	11845.3	3909.56	0.330052	-1.59923	1.60944e-10	5.49606e-09
FBgn0004198	ct	4121.09	1516.56	6725.63	4.43479	2.14887	3.98294e-13	1.97315e-11
FBgn0004227	nonA	10263.2	12173.7	8352.65	0.68612	-0.543467	0.0127031	0.0655468
FBgn0004228	mex1	8.37144	16.1499	0.593008	0.0367191	-4.76733	0.00612239	0.0369748
FBgn0004237	Hrb87F	27898.7	31474.2	24323.1	0.772795	-0.371843	0.0651983	0.212665
FBgn0004240	Dpt	0.344461	0.688921	0	0	#NAME?	1	1
FBgn0004242	Syt1	33.1262	51.5145	14.7379	0.286093	-1.80545	0.0981148	0.283491
FBgn0004244	Rdl	17.506	6.11197	28.9001	4.72845	2.24137	0.131963	0.348293
FBgn0004359	T48	1514.34	1881.29	1147.4	0.609901	-0.713353	0.00162048	0.0125823
FBgn0004360	Wnt2	1172.92	1788.67	557.173	0.311501	-1.68269	8.4785e-05	0.00102833
FBgn0004362	HmgD	75588.7	79522.5	71654.8	0.901063	-0.1503	0.725992	0.917081
FBgn0004363	porin	28585.8	29419.8	27751.7	0.943301	-0.0842102	0.844545	0.981851
FBgn0004364	18w	5819.38	7392.68	4246.07	0.574361	-0.799971	0.000200675	0.00215634
FBgn0004366	rdgC	0.483568	0.967137	0	0	#NAME?	0.586746	0.828274
FBgn0004367	mei-41	1197.37	1110.06	1284.69	1.15732	0.210785	0.436683	0.710394
FBgn0004368	Ptp4E	2729.6	3402.64	2056.55	0.604399	-0.726426	0.000209381	0.00224076
FBgn0004369	Ptp99A	4501.08	5415.81	3586.35	0.6622	-0.594661	0.00757739	0.0441018
FBgn0004370	Ptp10D	8016.83	7255.77	8777.89	1.20978	0.274746	0.23293	0.498051
FBgn0004372	aly	0	0	0	NA	NA	NA	NA
FBgn0004373	fwd	5800.02	6692.46	4907.58	0.7333	-0.447525	0.0208025	0.0939673
FBgn0004374	neb	1588.37	1544.46	1632.29	1.05687	0.079798	0.831134	0.975434
FBgn0004378	Klp61F	6777.42	5990.04	7564.8	1.2629	0.336735	0.228871	0.492967
FBgn0004379	Klp67A	3183.38	3002.3	3364.46	1.12063	0.164308	0.455387	0.724663
FBgn0004380	Klp64D	476.626	521.592	431.659	0.827579	-0.27303	0.419024	0.692844
FBgn0004381	Klp68D	328.617	284.855	372.378	1.30725	0.386538	0.310313	0.589561
FBgn0004387	Klp98A	2588.49	3017.44	2159.54	0.715688	-0.482598	0.0145693	0.0727223
FBgn0004389	bnk	0	0	0	NA	NA	NA	NA
FBgn0004390	Gap1	4151.02	3973.6	4328.43	1.0893	0.123397	0.481112	0.744602
FBgn0004391	shtd	2612.59	2715.34	2509.84	0.924319	-0.113537	0.436994	0.710394
FBgn0004394	pdm2	1398.62	2575.13	222.108	0.086251	-3.53531	5.13032e-19	4.47398e-17
FBgn0004395	unk	4938.66	4438.86	5438.46	1.22519	0.293008	0.183325	0.431186
FBgn0004396	CrebA	3977.58	5668.23	2286.93	0.403464	-1.30949	0.00068164	0.00615811
FBgn0004397	Vinc	4343.56	4081.52	4605.59	1.1284	0.174279	0.661078	0.878042
FBgn0004400	rhi	0	0	0	NA	NA	NA	NA
FBgn0004401	Pep	36218	40336.2	32099.7	0.795805	-0.329514	0.119263	0.324514
FBgn0004403	RpS14a	45303.6	33941.9	56665.4	1.66948	0.7394	0.0162494	0.078943
FBgn0004404	RpS14b	12039.1	9844.37	14233.9	1.44589	0.53196	0.0256244	0.109204
FBgn0004406	tam	1069.46	720.721	1418.2	1.96776	0.976553	5.00349e-05	0.000646228
FBgn0004407	DNApol-gamma35	0	0	0	NA	NA	NA	NA
FBgn0004414	msopa	0	0	0	NA	NA	NA	NA
FBgn0004419	me31B	13478.4	14205.3	12751.4	0.897652	-0.155772	0.608999	0.844703
FBgn0004425	LysB	4.83568	9.67137	0	0	#NAME?	0.523317	0.77863
FBgn0004426	LysC	0	0	0	NA	NA	NA	NA
FBgn0004427	LysD	0	0	0	NA	NA	NA	NA
FBgn0004428	LysE	0	0	0	NA	NA	NA	NA
FBgn0004429	LysP	0	0	0	NA	NA	NA	NA
FBgn0004430	LysS	0	0	0	NA	NA	NA	NA
FBgn0004431	LysX	0.789217	0.688921	0.889513	1.29117	0.368676	0.874175	0.996263
FBgn0004432	Cyp1	58117.9	58709.6	57526.2	0.979843	-0.0293772	0.748429	0.930751
FBgn0004435	Galpha49B	5425.06	5502.98	5347.15	0.971683	-0.041443	0.940166	1
FBgn0004436	UbcD6	6563.93	6473.46	6654.4	1.02795	0.0397713	0.640536	0.864376
FBgn0004449	Ten-m	14077.3	12473.3	15681.2	1.25718	0.330187	0.432731	0.706797
FBgn0004456	mew	5391.88	8227.86	2555.91	0.310641	-1.68668	9.19173e-15	5.47972e-13
FBgn0004462	Pk17E	2781.82	3153.09	2410.54	0.764503	-0.387406	0.0758238	0.236994
FBgn0004463	RpIII128	2178.55	1969.27	2387.84	1.21255	0.278045	0.238287	0.50551
FBgn0004465	Su(P)	1105.9	922.986	1288.82	1.39636	0.481675	0.0216655	0.0969802
FBgn0004507	GlyP	6788.38	5554.72	8022.03	1.44418	0.530253	0.0371978	0.143935
FBgn0004509	Fur1	5995.42	4017.17	7973.68	1.9849	0.989066	6.70993e-06	0.000109602
FBgn0004510	Ets97D	1102.14	1010.08	1194.21	1.1823	0.241591	0.315787	0.593713
FBgn0004511	dy	88.6568	176.319	0.994115	0.00563815	-7.47056	3.20079e-14	1.81585e-12
FBgn0004512	Mdr49	1536.48	2336.48	736.474	0.315206	-1.66563	0.000919053	0.00792308
FBgn0004513	Mdr65	23.5463	31.8316	15.2609	0.479426	-1.06062	0.240438	0.507856
FBgn0004514	Oct-TyrR	3.11282	0.644758	5.58089	8.65579	3.11366	0.490361	0.753062
FBgn0004516	Gad1	0.344461	0.688921	0	0	#NAME?	1	1
FBgn0004552	Akh	1.39522	0	2.79044	Inf	Inf	0.40953	0.683705
FBgn0004554	Edg91	195.608	110.96	280.255	2.52572	1.33669	0.039814	0.151134
FBgn0004556	Dbp73D	1425.09	1062.48	1787.7	1.68257	0.750667	0.00369869	0.0247329
FBgn0004567	slp2	226.188	13.4384	438.937	32.663	5.02959	2.05633e-05	0.000295217
FBgn0004569	aos	0	0	0	NA	NA	NA	NA
FBgn0004573	5-HT7	8.78995	3.0339	14.546	4.79449	2.26138	0.272365	0.545971
FBgn0004574	Rop	2656.92	3309.57	2004.26	0.605596	-0.723573	0.0003774	0.00374984
FBgn0004575	Syn	2.24103	1.0113	3.47075	3.43197	1.77904	0.479676	0.742923
FBgn0004577	Pxd	32.3505	49.8584	14.8425	0.297693	-1.7481	0.0586079	0.198088
FBgn0004580	Cbp53E	0.828029	1.65606	0	0	#NAME?	0.301553	0.579491
FBgn0004581	bgcn	40.5222	49.302	31.7425	0.643838	-0.635231	0.446462	0.71771
FBgn0004583	ex	18783.7	21858.5	15708.9	0.718663	-0.476613	0.0111582	0.0595857
FBgn0004584	Rrp1	10433	9717.14	11148.8	1.14733	0.198282	0.462761	0.730804
FBgn0004587	B52	24006.6	27637.6	20375.6	0.737243	-0.439789	0.0554029	0.190106
FBgn0004588	Eig71Ea	0	0	0	NA	NA	NA	NA
FBgn0004589	Eig71Eb	0	0	0	NA	NA	NA	NA
FBgn0004590	Eig71Ec	0	0	0	NA	NA	NA	NA
FBgn0004591	Eig71Ed	0	0	0	NA	NA	NA	NA
FBgn0004592	Eig71Ee	0.50565	1.0113	0	0	#NAME?	0.833754	0.976012
FBgn0004593	Eig71Ef	0	0	0	NA	NA	NA	NA
FBgn0004594	Eig71Eg	0	0	0	NA	NA	NA	NA
FBgn0004595	pros	55.144	29.6766	80.6114	2.71633	1.44166	0.0732107	0.231415
FBgn0004597	CycC	960.486	1113.71	807.266	0.724847	-0.464252	0.0841409	0.254628
FBgn0004598	Fur2	6341.3	7245.44	5437.17	0.750426	-0.414218	0.0240803	0.104308
FBgn0004603	Src42A	9928.97	10368.2	9489.69	0.915265	-0.127739	0.501347	0.762174
FBgn0004606	zfh1	3823.79	1488.76	6158.82	4.13688	2.04854	1.19489e-17	9.33961e-16
FBgn0004607	zfh2	20255.2	23622.3	16888.1	0.714924	-0.484139	0.0505633	0.178443
FBgn0004611	Plc21C	2073.8	2601.5	1546.1	0.594313	-0.750706	0.00101076	0.00856672
FBgn0004618	gl	20.3559	10.0688	30.643	3.04335	1.60566	0.308232	0.586945
FBgn0004619	Glu-RI	3.11329	0	6.22659	Inf	Inf	0.544728	0.795061
FBgn0004620	GluRIIA	1.0113	2.0226	0	0	#NAME?	0.423617	0.698002
FBgn0004622	Takr99D	0.697611	0	1.39522	Inf	Inf	0.724038	0.916127
FBgn0004623	Gbeta76C	12.0299	14.8162	9.24354	0.623881	-0.680658	0.518863	0.775831
FBgn0004624	CaMKII	9778.85	8694.76	10862.9	1.24937	0.321196	0.0972384	0.28173
FBgn0004629	Cys	244.147	104.318	383.975	3.6808	1.88002	8.60114e-06	0.000136071
FBgn0004635	rho	0	0	0	NA	NA	NA	NA
FBgn0004636	R	14051.2	12540.5	15562	1.24093	0.311427	0.144577	0.370015
FBgn0004638	drk	8302.13	7706.35	8897.91	1.15462	0.207418	0.276352	0.551138
FBgn0004643	mit(1)15	2879.91	2696.39	3063.42	1.13612	0.184115	0.519489	0.776081
FBgn0004644	hh	2241.49	3140.36	1342.62	0.427537	-1.22588	7.69406e-08	1.82035e-06
FBgn0004646	ogre	16292.4	22770.5	9814.33	0.431011	-1.2142	1.4912e-08	3.95947e-07
FBgn0004647	N	28080.5	30580.6	25580.5	0.836495	-0.257572	0.469054	0.735171
FBgn0004648	svr	4676.51	5297	4056.01	0.765718	-0.385115	0.0561749	0.19172
FBgn0004649	yl	2.0798	2.06676	2.09283	1.01261	0.0180831	1	1
FBgn0004650	fs(1)N	2.19248	2.98974	1.39522	0.46667	-1.09952	0.453732	0.722903
FBgn0004652	fru	8404.42	6290.18	10518.7	1.67223	0.741776	0.202011	0.457723
FBgn0004654	Pgd	2235.34	2195.56	2275.12	1.03624	0.051353	0.894815	1
FBgn0004655	wapl	3765.34	3875.45	3655.22	0.943172	-0.0844067	0.505627	0.765478
FBgn0004656	fs(1)h	22453.2	24666.5	20239.8	0.820541	-0.285352	0.232783	0.497836
FBgn0004657	mys	10850.5	9325.98	12375	1.32693	0.408096	0.0704835	0.225172
FBgn0004666	sim	1.04642	0	2.09283	Inf	Inf	0.583484	0.825324
FBgn0004687	Mlc-c	11750.9	9345.21	14156.6	1.51485	0.599178	0.00120002	0.00984647
FBgn0004698	mus210	9802.74	7609.44	11996	1.57647	0.656695	0.00162603	0.0126068
FBgn0004777	Ccp84Ag	0	0	0	NA	NA	NA	NA
FBgn0004778	Ccp84Af	0	0	0	NA	NA	NA	NA
FBgn0004779	Ccp84Ae	0	0	0	NA	NA	NA	NA
FBgn0004780	Ccp84Ad	0	0	0	NA	NA	NA	NA
FBgn0004781	Ccp84Ac	0	0	0	NA	NA	NA	NA
FBgn0004782	Ccp84Ab	0.161189	0.322379	0	0	#NAME?	1	1
FBgn0004783	Ccp84Aa	21.6491	0.688921	42.6093	61.8493	5.95069	0.362177	0.640277
FBgn0004784	inaC	0	0	0	NA	NA	NA	NA
FBgn0004795	retn	1927.53	10.1262	3844.94	379.701	8.56872	9.94051e-106	1.04892e-101
FBgn0004797	mdy	1084.79	1186.08	983.49	0.829192	-0.270223	0.312675	0.59152
FBgn0004811	fs(2)ltoPP43	2645.17	2773	2517.34	0.907805	-0.139546	0.495299	0.757778
FBgn0004828	His3.3B	37651.9	38922.1	36381.7	0.934731	-0.0973769	0.674824	0.885838
FBgn0004832	Xpac	989.229	980.925	997.532	1.01693	0.0242199	0.740052	0.926749
FBgn0004837	Su(H)	1297.76	1342.26	1253.25	0.933683	-0.0989959	0.6512	0.870466
FBgn0004838	Hrb27C	87450.3	88158.1	86742.5	0.983943	-0.0233541	1	1
FBgn0004839	otk	2735.68	4079.38	1391.97	0.341222	-1.55122	2.69015e-08	6.83496e-07
FBgn0004841	Takr86C	0	0	0	NA	NA	NA	NA
FBgn0004842	NepYr	2.65977	4.13353	1.18602	0.286926	-1.80125	0.93928	1
FBgn0004852	Ac76E	24.47	42.7661	6.17389	0.144364	-2.79221	4.7322e-11	1.76446e-09
FBgn0004854	B-H2	352.853	386.383	319.323	0.826443	-0.275014	0.657537	0.875941
FBgn0004855	RpII15	1632.38	1676.25	1588.51	0.947659	-0.0775606	0.952586	1
FBgn0004856	Bx42	3888.71	3882.52	3894.9	1.00319	0.00459127	0.842738	0.98076
FBgn0004858	elB	3677.54	3779.54	3575.54	0.946027	-0.0800469	0.575433	0.818841
FBgn0004859	ci	27636.5	20640	34633	1.67796	0.746708	0.000150171	0.00168812
FBgn0004860	ph-d	1560.26	1687.4	1433.13	0.849316	-0.235626	0.174998	0.417968
FBgn0004861	ph-p	4460.13	4325.5	4594.76	1.06225	0.0871228	0.774407	0.944922
FBgn0004862	bap	0	0	0	NA	NA	NA	NA
FBgn0004863	C15	309.832	411.02	208.643	0.507622	-0.978174	0.0018192	0.0138379
FBgn0004864	hop	3165.44	3566.48	2764.4	0.775107	-0.367532	0.0595131	0.200186
FBgn0004865	Eip78C	1736.28	3016.15	456.403	0.15132	-2.72433	0.0069793	0.041258
FBgn0004867	RpS2	99059.7	88277.8	109842	1.24427	0.315303	0.0813468	0.249237
FBgn0004868	Gdi	12954.2	14802.7	11105.8	0.750252	-0.414552	0.0732736	0.231492
FBgn0004870	bab1	252.921	141.255	364.586	2.58105	1.36796	0.000675013	0.00610346
FBgn0004872	piwi	24.3603	29.6059	19.1147	0.645637	-0.631204	0.0850159	0.256384
FBgn0004875	enc	6456.6	6618.36	6294.85	0.951119	-0.0723017	0.568212	0.814421
FBgn0004876	cdi	4786.93	4360.82	5213.03	1.19542	0.257522	0.562157	0.809813
FBgn0004878	cas	22.6506	32.918	12.3832	0.376182	-1.4105	0.368704	0.644987
FBgn0004880	scrt	6.71708	7.59137	5.84278	0.769661	-0.377704	0.921719	1
FBgn0004882	orb	50.374	21.4272	79.3208	3.70187	1.88826	0.00754169	0.0439668
FBgn0004885	tok	7658.15	12407.6	2908.71	0.23443	-2.09277	1.16654e-22	1.43132e-20
FBgn0004888	Scsalpha	6630.16	5822.44	7437.87	1.27745	0.353265	0.0946584	0.277107
FBgn0004889	tws	11396.8	12166.9	10626.7	0.873411	-0.195267	0.393058	0.667202
FBgn0004892	sob	1228.23	2119	337.465	0.159256	-2.65058	2.40858e-25	3.79334e-23
FBgn0004893	bowl	14781.2	20011.1	9551.32	0.477302	-1.06703	2.59393e-07	5.63191e-06
FBgn0004895	fd64A	4.30796	0	8.61592	Inf	Inf	0.194173	0.445999
FBgn0004896	fd59A	3.96329	5.83375	2.09283	0.358746	-1.47897	0.494351	0.756766
FBgn0004897	fd96Ca	43.1955	4.92401	81.4671	16.5449	4.04831	0.0176057	0.0835322
FBgn0004898	fd96Cb	199.183	26.5279	371.838	14.0169	3.8091	1.77309e-12	8.0994e-11
FBgn0004901	Prat	2974.47	2915.11	3033.83	1.04072	0.0575882	0.880113	1
FBgn0004903	Rb97D	2918.8	2934.2	2903.4	0.989504	-0.0152226	0.743468	0.928447
FBgn0004907	14-3-3zeta	66755.6	55734.6	77776.5	1.39548	0.48076	0.00929131	0.0515196
FBgn0004908	Arf84F	744.747	728.025	761.469	1.04594	0.0647969	0.661505	0.878042
FBgn0004910	Eip63F-1	28.3253	50.4767	6.17389	0.122312	-3.03136	2.01472e-08	5.24922e-07
FBgn0004911	Eip63F-2	0.344461	0.688921	0	0	#NAME?	1	1
FBgn0004913	Gnf1	4968.51	4041.42	5895.59	1.45879	0.544775	0.0105278	0.0570274
FBgn0004914	Hnf4	1599.56	1762.35	1436.77	0.815262	-0.294665	0.10136	0.289616
FBgn0004915	TfIIB	2423.59	2868.39	1978.79	0.689862	-0.535621	0.00434599	0.0280998
FBgn0004919	gol	52.683	14.2024	91.1636	6.4189	2.68233	1.60816e-05	0.000235358
FBgn0004921	Ggamma1	13012.7	12880	13145.4	1.02061	0.0294274	0.65111	0.870457
FBgn0004924	Top1	11405.7	12462.7	10348.7	0.830378	-0.268159	0.159178	0.393085
FBgn0004926	eIF-2beta	12760.4	12270.7	13250.2	1.07982	0.110794	0.490236	0.753062
FBgn0004956	os	648.729	266.745	1030.71	3.86404	1.95011	3.09226e-05	0.000426579
FBgn0004957	por	1558.29	1564.25	1552.33	0.992382	-0.0110332	0.948363	1
FBgn0004959	phm	65.6984	72.0628	59.3339	0.823363	-0.2804	0.664853	0.87991
FBgn0005198	gig	2623.67	2392.48	2854.86	1.19326	0.254911	0.28457	0.560115
FBgn0005278	Sam-S	24211.2	15902.6	32519.8	2.04493	1.03205	1.00258e-06	1.98485e-05
FBgn0005322	nmd	1959.72	1728.36	2191.07	1.26772	0.342234	0.100856	0.288801
FBgn0005355	Su(fu)	1596.13	1755.05	1437.21	0.8189	-0.28824	0.227641	0.491522
FBgn0005386	ash1	2437.35	2802.43	2072.27	0.739454	-0.435469	0.0227619	0.100328
FBgn0005390	fs(1)M3	0.344461	0.688921	0	0	#NAME?	1	1
FBgn0005391	Yp2	2.3849	3.07806	1.69173	0.549607	-0.863528	0.837059	0.978036
FBgn0005410	sno	3094.81	2595.04	3594.57	1.38517	0.47006	0.0323425	0.129961
FBgn0005411	U2af50	5637.69	5732.98	5542.41	0.966758	-0.0487728	0.910416	1
FBgn0005427	ewg	3390.63	3547.95	3233.3	0.911314	-0.133979	0.826452	0.97288
FBgn0005533	RpS17	35164.5	29536.2	40792.7	1.38111	0.465824	0.0141049	0.0710088
FBgn0005536	Mbs	4918.51	6141.53	3695.49	0.601722	-0.732832	0.000199328	0.00214405
FBgn0005558	ey	58.5958	33.9116	83.2799	2.45579	1.29619	0.143389	0.368454
FBgn0005561	sv	729.082	37.5197	1420.64	37.864	5.24275	2.90568e-41	1.33308e-38
FBgn0005564	Shal	66.2743	99.9685	32.5801	0.325903	-1.61748	0.0221719	0.0985558
FBgn0005585	Crc	44893.2	55946.7	33839.6	0.604855	-0.72534	0.000703479	0.00631217
FBgn0005586	Rab3	12.7562	18.6583	6.8542	0.367355	-1.44475	0.264654	0.537353
FBgn0005590	scw	0	0	0	NA	NA	NA	NA
FBgn0005592	btl	276.506	478.102	74.9094	0.156681	-2.6741	7.30753e-10	2.2746e-08
FBgn0005593	RpL7	83502.5	69865.3	97139.8	1.39039	0.475486	0.0117231	0.0618512
FBgn0005596	yemalpha	2250.61	2467.02	2034.2	0.824557	-0.278308	0.17532	0.418451
FBgn0005612	Sox14	1146.73	1369.08	924.383	0.675186	-0.566643	0.0269068	0.113071
FBgn0005613	Sox15	5485.51	6082.54	4888.47	0.803689	-0.31529	0.139534	0.362511
FBgn0005614	trpl	1.19892	1.70022	0.697611	0.410306	-1.28523	0.861248	0.990556
FBgn0005616	msl-2	1416.58	1897.32	935.838	0.493242	-1.01963	9.21977e-07	1.83215e-05
FBgn0005617	msl-1	3162.07	3565.69	2758.44	0.773608	-0.370326	0.0556694	0.190536
FBgn0005619	Hdc	8.24262	11.6366	4.84867	0.416675	-1.26301	0.475645	0.739125
FBgn0005624	Psc	2296.01	3835.48	756.551	0.197251	-2.3419	5.5046e-13	2.66443e-11
FBgn0005626	ple	305.06	505.106	105.014	0.207904	-2.26601	0.172651	0.414424
FBgn0005630	lola	30076.4	29276.2	30876.7	1.05467	0.0767915	0.544834	0.795061
FBgn0005631	robo	3692.66	4424.48	2960.84	0.669196	-0.579499	0.00493561	0.0310558
FBgn0005632	faf	10060.6	11178.7	8942.54	0.799965	-0.321992	0.143548	0.368454
FBgn0005633	fln	0.644758	1.28952	0	0	#NAME?	0.774237	0.944922
FBgn0005634	zip	63060.7	53307.2	72814.1	1.36594	0.449889	0.235771	0.502294
FBgn0005636	nvy	363.42	600.986	125.854	0.209412	-2.25558	3.57399e-05	0.000482877
FBgn0005638	slbo	12.4498	21.2196	3.67996	0.173422	-2.52764	0.0205259	0.0930365
FBgn0005640	Eip63E	3407.81	3823.08	2992.54	0.782757	-0.353364	0.234347	0.499966
FBgn0005642	wdn	2544.4	2541.38	2547.41	1.00237	0.00341803	0.825556	0.97288
FBgn0005648	Pabp2	16764.5	14567.1	18962	1.3017	0.3804	0.036333	0.141785
FBgn0005649	Rox8	10229.2	11323	9135.52	0.806814	-0.309692	0.149597	0.378457
FBgn0005654	lat	0	0	0	NA	NA	NA	NA
FBgn0005655	mus209	11073.5	9458.11	12688.9	1.34159	0.423943	0.0300698	0.122977
FBgn0005658	Ets65A	0.348805	0	0.697611	Inf	Inf	0.991993	1
FBgn0005659	Ets98B	457.011	490.14	423.882	0.864818	-0.209531	0.466212	0.733264
FBgn0005660	Ets21C	2098.15	117.381	4078.92	34.7493	5.11891	2.25417e-23	2.97325e-21
FBgn0005664	Cry	0	0	0	NA	NA	NA	NA
FBgn0005666	bt	86.0861	129.146	43.0261	0.333159	-1.58572	0.24907	0.51962
FBgn0005670	Cyp4d1	23.6362	34.3488	12.9235	0.376243	-1.41026	0.154128	0.385118
FBgn0005671	Vha55	6581.26	6288.53	6874	1.0931	0.128426	0.670884	0.88266
FBgn0005672	spi	8058.53	7450.02	8667.04	1.16336	0.218295	0.311695	0.591375
FBgn0005674	Aats-glupro	11007.3	11139.3	10875.3	0.9763	-0.0346037	0.793724	0.954133
FBgn0005677	dac	1389.86	1430.69	1349.02	0.942913	-0.0848033	0.915875	1
FBgn0005683	pie	678.913	548.866	808.959	1.47387	0.559611	0.048148	0.173044
FBgn0005694	Aef1	2427.9	2685.15	2170.65	0.80839	-0.306876	0.115193	0.317036
FBgn0005695	gcl	940.232	657.897	1222.57	1.8583	0.893981	0.000327979	0.0033438
FBgn0005696	DNApol-alpha73	1153.89	1020.92	1286.85	1.26049	0.333981	0.183352	0.431186
FBgn0005771	noc	5643.87	5350.11	5937.63	1.10981	0.150319	0.442376	0.714299
FBgn0005775	Con	138.787	234.251	43.3234	0.184945	-2.43483	0.000878021	0.00760663
FBgn0005777	PpD3	3928.42	3614.21	4242.62	1.17387	0.231274	0.212738	0.472691
FBgn0005778	PpD5	0	0	0	NA	NA	NA	NA
FBgn0005779	PpD6	0	0	0	NA	NA	NA	NA
FBgn0008635	betaCop	7544.87	8632.29	6457.46	0.748059	-0.418776	0.0253275	0.108289
FBgn0008636	hbn	0	0	0	NA	NA	NA	NA
FBgn0008646	E5	1111.29	1884.31	338.267	0.179518	-2.4778	2.92172e-12	1.28996e-10
FBgn0008651	lbl	850.914	20.7692	1681.06	80.94	6.33878	8.18466e-26	1.34945e-23
FBgn0008654	Su(z)2	748.267	1293.1	203.43	0.157319	-2.66823	6.3767e-22	7.47633e-20
FBgn0010014	CanB	1.89601	1.61189	2.18013	1.35253	0.435658	1	1
FBgn0010015	CanA1	6.84846	10.4354	3.26155	0.312547	-1.67786	0.570555	0.815672
FBgn0010019	Cyp4g1	0	0	0	NA	NA	NA	NA
FBgn0010038	GstD2	39.2475	35.2763	43.2188	1.22515	0.292963	0.667554	0.881039
FBgn0010039	GstD3	4090.02	4311.85	3868.19	0.897107	-0.156648	0.590887	0.832115
FBgn0010040	GstD4	27.0157	35.7708	18.2606	0.510488	-0.970052	0.135512	0.354821
FBgn0010041	GstD5	12.9488	22.2177	3.67996	0.165632	-2.59395	0.0603966	0.202127
FBgn0010042	GstD6	0.805947	1.61189	0	0	#NAME?	0.103485	0.293384
FBgn0010043	GstD7	1.12833	2.25665	0	0	#NAME?	0.209437	0.467902
FBgn0010044	GstD8	0.161189	0.322379	0	0	#NAME?	1	1
FBgn0010051	Itp-r83A	3613.94	3987.68	3240.19	0.81255	-0.299472	0.167801	0.407335
FBgn0010052	Jhe	1.34237	1.28952	1.39522	1.08197	0.113665	0.946385	1
FBgn0010053	Jheh1	602.202	390.128	814.276	2.0872	1.06157	5.16276e-05	0.00066355
FBgn0010078	RpL23	74288.9	60994.1	87583.7	1.43594	0.521993	0.00923709	0.0512999
FBgn0010097	gammaTub37C	7.59065	1.33368	13.8476	10.383	3.37615	0.268503	0.541937
FBgn0010100	Acon	10513.8	10344.9	10682.6	1.03264	0.0463324	0.976034	1
FBgn0010105	comm	446.638	675.385	217.89	0.322617	-1.63211	5.58944e-07	1.16331e-05
FBgn0010109	dpn	676.267	1010.64	341.893	0.338293	-1.56365	6.24518e-05	0.000786386
FBgn0010113	hdc	15731.8	15868.6	15595	0.982759	-0.0250909	0.830813	0.975431
FBgn0010114	hig	8.82768	6.94661	10.7088	1.54158	0.62441	0.605125	0.841386
FBgn0010173	RpA-70	9265.98	7282.69	11249.3	1.54466	0.62729	0.00301717	0.0210424
FBgn0010194	Wnt5	4529.81	4822.47	4237.15	0.878627	-0.186677	0.339964	0.618553
FBgn0010197	Gyc32E	1.65606	3.31212	0	0	#NAME?	0.127873	0.340564
FBgn0010198	RpS15Aa	41414.8	34160.9	48668.7	1.42469	0.510648	0.015616	0.076642
FBgn0010213	Sod2	3374.11	3218.73	3529.5	1.09655	0.132971	0.651792	0.870816
FBgn0010215	alpha-Cat	11196.1	12587.7	9804.55	0.778898	-0.360493	0.175686	0.418947
FBgn0010217	ATPsyn-beta	40535	39693.3	41376.6	1.04241	0.0599203	0.53743	0.790598
FBgn0010220	Dbp45A	1696.01	1225.81	2166.21	1.76716	0.821437	0.000195736	0.00211186
FBgn0010222	Nmdmc	2389	1704.22	3073.77	1.80363	0.850902	0.000114272	0.00132797
FBgn0010223	Galpha73B	12.901	18.1283	7.67372	0.4233	-1.24025	0.0382052	0.146864
FBgn0010225	Gel	2463.57	2733.22	2193.91	0.802685	-0.317095	0.22209	0.484092
FBgn0010226	GstS1	19217.7	21251.7	17183.6	0.808577	-0.306543	0.168814	0.408655
FBgn0010228	HmgZ	19641.6	18705.8	20577.4	1.10005	0.137573	0.344101	0.623125
FBgn0010235	Klc	4333.21	4078.17	4588.24	1.12507	0.17002	0.503536	0.763516
FBgn0010238	Lac	14296.1	16183	12409.2	0.766806	-0.383066	0.110175	0.306261
FBgn0010240	Lcch3	52.1836	38.2837	66.0835	1.72615	0.78756	0.0696338	0.22293
FBgn0010241	Mdr50	10.1662	15.8849	4.44756	0.279987	-1.83657	0.145742	0.371734
FBgn0010246	Myo61F	3588.37	2755.41	4421.33	1.6046	0.682214	0.00169304	0.0129801
FBgn0010247	Parp	8199.07	6560.76	9837.37	1.49943	0.584411	0.0305484	0.124602
FBgn0010258	Rbp4	35.479	56.7785	14.1795	0.249734	-2.00154	0.136705	0.356704
FBgn0010263	Rbp9	40.3616	38.7076	42.0155	1.08546	0.118304	0.514757	0.772026
FBgn0010265	RpS13	75617.5	63726.1	87509	1.3732	0.457546	0.0437374	0.16137
FBgn0010269	Dsor1	1313.96	1526.87	1101.04	0.72111	-0.471709	0.0751405	0.235163
FBgn0010278	Ssrp	13537.2	11774.1	15300.4	1.29949	0.377946	0.134759	0.353285
FBgn0010280	Taf4	9377.6	9627.57	9127.63	0.948072	-0.0769322	0.71709	0.912424
FBgn0010282	TfIIFalpha	3515.09	3752.49	3277.69	0.873471	-0.195169	0.254695	0.525924
FBgn0010287	Trf	660.356	605.495	715.217	1.18121	0.240267	0.312113	0.591511
FBgn0010288	Uch	6332.16	5123.3	7541.02	1.47191	0.557685	0.00335537	0.0229339
FBgn0010292	bys	3186.76	2876.14	3497.38	1.216	0.282141	0.22243	0.484633
FBgn0010294	ng2	0	0	0	NA	NA	NA	NA
FBgn0010295	ng3	0	0	0	NA	NA	NA	NA
FBgn0010296	ng4	0	0	0	NA	NA	NA	NA
FBgn0010300	brat	19834.8	22433.8	17235.9	0.768299	-0.380259	0.0847742	0.255761
FBgn0010303	hep	4442.68	4187.32	4698.03	1.12197	0.16603	0.499244	0.760396
FBgn0010309	pigeon	888.255	830.785	945.726	1.13835	0.186947	0.727714	0.918083
FBgn0010313	corto	7803.47	5996.87	9610.07	1.60251	0.680338	0.00257963	0.018492
FBgn0010314	Cks30A	4860.17	4477.16	5243.19	1.1711	0.227862	0.371482	0.647486
FBgn0010315	CycD	2673.52	2768.51	2578.54	0.931381	-0.102557	0.678767	0.887996
FBgn0010316	dap	4038.08	3960.47	4115.7	1.0392	0.0554666	0.801082	0.957958
FBgn0010317	CycJ	1.19892	1.70022	0.697611	0.410306	-1.28523	0.768105	0.941571
FBgn0010323	Gsc	32.9284	2.0226	63.8341	31.5604	4.98004	0.00109789	0.00914361
FBgn0010328	woc	15965.7	18605.2	13326.3	0.716265	-0.481434	0.0111694	0.0596154
FBgn0010329	Tbh	12.399	2.57903	22.2189	8.61523	3.10689	0.0107492	0.0578396
FBgn0010333	Rac1	6845.55	6378.57	7312.54	1.14642	0.197139	0.261287	0.533185
FBgn0010339	128up	3568.87	3507.31	3630.43	1.0351	0.049776	0.76051	0.936941
FBgn0010340	140up	603.297	524.167	682.427	1.30193	0.380648	0.0947918	0.277135
FBgn0010341	Cdc42	12465.1	13025	11905.1	0.914019	-0.129703	0.571042	0.816119
FBgn0010342	Map60	0	0	0	NA	NA	NA	NA
FBgn0010348	Arf79F	28836.7	31238.5	26435	0.846233	-0.240873	0.309365	0.58829
FBgn0010350	CdsA	1133.6	1326.66	940.53	0.708945	-0.496255	0.0320351	0.129115
FBgn0010352	Nc73EF	6257.01	5195.3	7318.71	1.40872	0.494384	0.0157303	0.0770239
FBgn0010355	Taf1	6009.39	6915.41	5103.37	0.737971	-0.438363	0.0312966	0.126936
FBgn0010356	Taf5	1651.19	1851.49	1450.89	0.783631	-0.351753	0.0967666	0.280671
FBgn0010357	betaTry	23.0372	45.7778	0.296504	0.00647703	-7.27045	0.462881	0.730858
FBgn0010358	deltaTry	0	0	0	NA	NA	NA	NA
FBgn0010359	gammaTry	0	0	0	NA	NA	NA	NA
FBgn0010379	Akt1	7536.85	7762.34	7311.35	0.9419	-0.0863539	0.786409	0.950172
FBgn0010380	Bap	4979.14	5279.56	4678.72	0.886194	-0.174306	0.3161	0.593722
FBgn0010381	Drs	10.5366	7.22483	13.8484	1.91678	0.938684	0.549712	0.798824
FBgn0010382	CycE	3579.24	3680.37	3478.1	0.945042	-0.0815499	0.756147	0.934621
FBgn0010383	Cyp18a1	298.931	163.301	434.561	2.66111	1.41203	0.157834	0.390938
FBgn0010385	Def	0	0	0	NA	NA	NA	NA
FBgn0010387	Dbi	6.89718	3.31212	10.4822	3.16482	1.66212	0.290493	0.565655
FBgn0010388	Dro	11.818	11.27	12.3659	1.09724	0.133873	0.721355	0.914432
FBgn0010389	htl	731.456	1115.3	347.611	0.311675	-1.68188	4.82662e-13	2.34703e-11
FBgn0010391	Gtp-bp	4385.44	4670.71	4100.17	0.877848	-0.187957	0.366601	0.643227
FBgn0010395	betaInt-nu	16.3324	8.0904	24.5745	3.03748	1.60288	0.0179325	0.0848157
FBgn0010397	LamC	0	0	0	NA	NA	NA	NA
FBgn0010398	Lrr47	407.281	370.396	444.166	1.19917	0.262031	0.313331	0.592034
FBgn0010399	Nmdar1	12.3435	19.2279	5.45898	0.283909	-1.8165	0.0417752	0.156594
FBgn0010401	Os-C	54.0988	107.308	0.889513	0.00828933	-6.91453	4.6809e-09	1.33494e-07
FBgn0010403	Os-E	0	0	0	NA	NA	NA	NA
FBgn0010406	RNaseX25	1525.5	1336.09	1714.91	1.28353	0.360117	0.0289889	0.119442
FBgn0010407	Ror	75.8168	62.4047	89.2289	1.42984	0.515856	0.155114	0.386469
FBgn0010408	RpS9	86420.5	67637	105204	1.55542	0.637303	0.000329049	0.00335147
FBgn0010409	RpL18A	59922.2	47692.1	72152.3	1.51288	0.597295	0.0088974	0.0497538
FBgn0010411	RpS18	68683.2	57147.7	80218.7	1.40371	0.489241	0.0318041	0.128483
FBgn0010412	RpS19a	48119.8	37512.2	58727.4	1.56555	0.646674	0.000442957	0.00427638
FBgn0010414	SerT	42.4742	72.1467	12.8016	0.177438	-2.49461	2.79934e-06	5.03213e-05
FBgn0010415	Sdc	14464.1	16116.3	12811.9	0.794965	-0.331037	0.171116	0.41224
FBgn0010416	TH1	3586.94	3376.06	3797.82	1.12493	0.169831	0.405842	0.680008
FBgn0010417	Taf6	2053.83	2123.21	1984.45	0.934646	-0.0975073	0.50479	0.764539
FBgn0010421	TfIIFbeta	1230.91	1338.68	1123.13	0.838987	-0.253279	0.225053	0.488329
FBgn0010422	TfIIS	4623.75	4612.74	4634.75	1.00477	0.00686871	0.946924	1
FBgn0010423	TpnC47D	2.06676	4.13353	0	0	#NAME?	0.36891	0.645082
FBgn0010424	TpnC73F	63.4307	123.984	2.87774	0.0232107	-5.42907	0.00921686	0.0512414
FBgn0010425	epsilonTry	72.3611	144.426	0.296504	0.00205299	-8.92806	0.400356	0.67413
FBgn0010431	mtrm	0	0	0	NA	NA	NA	NA
FBgn0010433	ato	388.168	39.0123	737.324	18.8998	4.2403	0.12638	0.337786
FBgn0010434	cora	18469.2	17263.3	19675	1.1397	0.188656	0.715711	0.911659
FBgn0010435	emp	3856.6	6786.8	926.393	0.136499	-2.87304	1.38319e-34	4.29276e-32
FBgn0010438	mtSSB	1838.33	1433.09	2243.57	1.56555	0.646671	0.00464242	0.029653
FBgn0010441	pll	0	0	0	NA	NA	NA	NA
FBgn0010452	trn	4432.01	6868.01	1996	0.290622	-1.78278	5.4503e-14	3.02692e-12
FBgn0010453	Wnt4	4168.17	633.771	7702.57	12.1535	3.60331	5.08977e-46	2.98374e-43
FBgn0010470	Fkbp13	6731.16	9354.12	4108.19	0.439185	-1.1871	0.0284439	0.118026
FBgn0010473	tutl	3038.67	5069.15	1008.19	0.198887	-2.32998	6.15916e-21	6.49914e-19
FBgn0010482	l(2)01289	14.253	19.8727	8.63323	0.434427	-1.20282	0.312124	0.591511
FBgn0010488	NAT1	23277.8	27545.1	19010.4	0.690157	-0.535003	0.0219921	0.0980402
FBgn0010497	dmGlut	398.003	740.859	55.1482	0.0744382	-3.74781	1.28168e-30	2.81756e-28
FBgn0010501	Dcp-1	0	0	0	NA	NA	NA	NA
FBgn0010504	kermit	0	0	0	NA	NA	NA	NA
FBgn0010516	wal	3033.51	2660.77	3406.26	1.28018	0.356348	0.0748216	0.234348
FBgn0010520	Bka	1025.96	698.844	1353.07	1.93615	0.953191	8.51061e-06	0.000135247
FBgn0010531	CCS	635.839	620.298	651.38	1.05011	0.0705397	0.930579	1
FBgn0010548	Aldh-III	4933.44	5236.4	4630.47	0.884285	-0.177416	0.297062	0.574081
FBgn0010549	l(2)03659	2226.14	1758.82	2693.46	1.5314	0.614849	0.0137265	0.0696021
FBgn0010551	l(2)03709	10186.3	10164.5	10208.1	1.00429	0.00618156	0.987641	1
FBgn0010575	sbb	13695	16690.8	10699.2	0.641025	-0.641547	0.0919605	0.271372
FBgn0010583	dock	2457.32	2666.13	2248.51	0.843362	-0.245776	0.280034	0.55554
FBgn0010590	Prosbeta1	4627.84	5057.46	4198.22	0.830106	-0.268633	0.267981	0.54155
FBgn0010591	Sply	1797.53	1688.14	1906.91	1.12959	0.175802	0.498472	0.759988
FBgn0010602	lwr	12932.6	13514	12351.1	0.91395	-0.129813	0.496602	0.758894
FBgn0010607	l(2)05714	1340.87	1289.87	1391.87	1.07908	0.109796	0.430407	0.704787
FBgn0010611	Hmgs	2436.09	1774.71	3097.48	1.74535	0.803515	0.000101707	0.0012045
FBgn0010612	l(2)06225	5614.89	5354.29	5875.49	1.09734	0.134013	0.496641	0.758894
FBgn0010620	Sip1	10415	14233.9	6596.13	0.46341	-1.10964	4.2977e-08	1.05219e-06
FBgn0010621	Cct5	20244.9	19623.8	20866	1.0633	0.0885449	0.602016	0.839829
FBgn0010622	l(2)06496	1420.76	1408.54	1432.98	1.01735	0.0248116	0.679231	0.888208
FBgn0010638	Sec61beta	8276.62	9112.64	7440.6	0.816514	-0.29245	0.386995	0.661736
FBgn0010651	l(2)08717	1553.58	2237.61	869.549	0.388606	-1.36362	9.92944e-05	0.00118257
FBgn0010660	Nup214	6932.78	7083.96	6781.6	0.957318	-0.0629305	0.713532	0.909872
FBgn0010704	l(2)s5379	4774.44	5061.88	4487	0.88643	-0.173922	0.368801	0.645051
FBgn0010709	Atg6	1021.28	875.644	1166.91	1.33263	0.414279	0.158736	0.392266
FBgn0010741	l(3)01239	6760.81	6002.21	7519.41	1.25277	0.325126	0.0575083	0.19531
FBgn0010747	Srp54k	4646.59	5383.6	3909.57	0.7262	-0.461562	0.0400588	0.151741
FBgn0010750	atms	2777.06	2952.86	2601.26	0.880929	-0.182902	0.288707	0.563896
FBgn0010762	simj	4510.01	5572.28	3447.74	0.61873	-0.692618	0.00169082	0.0129757
FBgn0010768	sqz	1449.25	1450.9	1447.6	0.997731	-0.00327759	0.563518	0.810998
FBgn0010770	ppan	2000.89	1616.14	2385.65	1.47614	0.561827	0.00959786	0.0528308
FBgn0010772	Xe7	4859.7	6147.66	3571.74	0.580991	-0.783411	0.000772394	0.00681051
FBgn0010774	Ref1	11652.2	13341.4	9963.06	0.746776	-0.421253	0.0654189	0.213187
FBgn0010786	l(3)02640	1035.88	1051.28	1020.48	0.970701	-0.0429006	0.927801	1
FBgn0010803	Aats-trp	2169.41	2170.02	2168.79	0.999434	-0.000817391	0.788683	0.950672
FBgn0010808	l(3)03670	2488.94	2314.06	2663.82	1.15114	0.20307	0.281901	0.557753
FBgn0010812	unc-45	2306.88	2409.02	2204.75	0.915205	-0.127833	0.444689	0.716366
FBgn0010825	Gug	9683.18	10808.2	8558.14	0.791817	-0.33676	0.0800358	0.247303
FBgn0010830	l(3)04053	1518.97	1551.44	1486.5	0.958148	-0.0616803	0.737088	0.924382
FBgn0010877	l(3)05822	2470.2	2547.87	2392.54	0.939036	-0.0907482	0.482549	0.745727
FBgn0010894	sinu	7931.1	7090.77	8771.43	1.23702	0.306869	0.0525014	0.18323
FBgn0010905	Spn	1466.7	1689.71	1243.69	0.736039	-0.442145	0.240369	0.507856
FBgn0010909	msn	12252.9	13821.5	10684.4	0.773027	-0.37141	0.0415586	0.156059
FBgn0010926	l(3)07882	3148.43	3004.96	3291.89	1.09549	0.131572	0.813589	0.966125
FBgn0011016	SsRbeta	6008.43	7478.08	4538.79	0.606945	-0.720362	0.00260862	0.0186509
FBgn0011020	Sas-4	1802.86	1611.46	1994.25	1.23754	0.307477	0.244295	0.512996
FBgn0011202	dia	3733.53	3041.04	4426.03	1.45544	0.541452	0.131791	0.347926
FBgn0011204	cue	0	0	0	NA	NA	NA	NA
FBgn0011205	fbl	2108.81	2033.06	2184.56	1.07452	0.103691	0.815418	0.9671
FBgn0011206	bol	317.258	346.412	288.104	0.831679	-0.265901	0.154872	0.386219
FBgn0011207	pelo	2711.47	2689.64	2733.31	1.01624	0.0232363	0.856654	0.989008
FBgn0011211	blw	31909.2	32351.2	31467.3	0.972678	-0.0399665	0.811709	0.965087
FBgn0011217	eff	29061.3	29358.5	28764.1	0.979753	-0.02951	0.871793	0.995681
FBgn0011224	heph	29554.9	36985.1	22124.7	0.598205	-0.741289	0.000280587	0.00289418
FBgn0011225	jar	9595.9	14495.8	4696.01	0.323957	-1.62613	7.38045e-08	1.75798e-06
FBgn0011227	ox	1806.11	1553.31	2058.91	1.3255	0.406532	0.148349	0.376752
FBgn0011230	poe	13813.6	14372.8	13254.3	0.922179	-0.116881	0.703527	0.903864
FBgn0011232	scat	1340.24	1216.29	1464.2	1.20382	0.267623	0.241121	0.508455
FBgn0011236	ken	2668.94	1736.58	3601.31	2.0738	1.05228	0.0664867	0.215801
FBgn0011239	ms(2)35Ci	0	0	0	NA	NA	NA	NA
FBgn0011241	cbx	1.13368	1.37784	0.889513	0.645584	-0.631324	1	1
FBgn0011244	Hsp60B	0	0	0	NA	NA	NA	NA
FBgn0011259	Sema-1a	852.847	1219.37	486.322	0.39883	-1.32615	0.000505098	0.004763
FBgn0011260	Sema-2a	22944.9	24624	21265.8	0.863621	-0.21153	0.383846	0.659599
FBgn0011270	Pglym87	0	0	0	NA	NA	NA	NA
FBgn0011272	RpL13	57978	48173.5	67782.5	1.40705	0.492674	0.00903358	0.0504084
FBgn0011273	And	0	0	0	NA	NA	NA	NA
FBgn0011274	Dif	710.311	268.537	1152.08	4.29022	2.10105	4.52135e-07	9.56099e-06
FBgn0011276	HLH3B	0.161189	0.322379	0	0	#NAME?	0.984822	1
FBgn0011277	HLH4C	0	0	0	NA	NA	NA	NA
FBgn0011278	lbe	17.7422	3.44461	32.0398	9.30143	3.21745	0.469701	0.73579
FBgn0011279	Pbprp1	0	0	0	NA	NA	NA	NA
FBgn0011280	Pbprp2	2.36236	1.93427	2.79044	1.44263	0.528702	0.900095	1
FBgn0011281	Pbprp3	0	0	0	NA	NA	NA	NA
FBgn0011282	Pbprp4	19.6082	23.4498	15.7666	0.672357	-0.572701	0.749899	0.931262
FBgn0011283	Pbprp5	0.697611	0	1.39522	Inf	Inf	0.909955	1
FBgn0011284	RpS4	68067.2	61968.1	74166.2	1.19684	0.259235	0.167793	0.407335
FBgn0011286	Rya-r44F	25.5528	38.5133	12.5924	0.326962	-1.6128	0.0352523	0.138644
FBgn0011288	Snap25	1217.8	803.696	1631.9	2.03049	1.02183	0.00452615	0.0290688
FBgn0011289	TfIIA-L	3149.44	3318.68	2980.2	0.898007	-0.155202	0.357097	0.636051
FBgn0011290	Taf12	1514.04	1561.38	1466.7	0.939364	-0.0902444	0.660801	0.878042
FBgn0011291	Taf11	816.162	876.89	755.434	0.861492	-0.21509	0.512993	0.771317
FBgn0011293	a10	0	0	0	NA	NA	NA	NA
FBgn0011294	a5	0	0	0	NA	NA	NA	NA
FBgn0011296	l(2)efl	16.1519	30.9087	1.39522	0.0451401	-4.46945	0.0412077	0.155017
FBgn0011297	l(2)not	809.219	506.847	1111.59	2.19315	1.133	9.89546e-06	0.000154463
FBgn0011300	babo	6540.48	7187.07	5893.89	0.820069	-0.286183	0.253123	0.524577
FBgn0011305	Rsf1	6224.48	6848.37	5600.59	0.8178	-0.290181	0.213487	0.473856
FBgn0011327	Uch-L3	6061.26	6885.33	5237.19	0.76063	-0.394732	0.152598	0.383385
FBgn0011335	l(3)j2D3	1444.33	1509.97	1378.68	0.913052	-0.131231	0.574237	0.818146
FBgn0011336	OstStt3	10939.8	13276.2	8603.3	0.648024	-0.62588	0.00533492	0.032959
FBgn0011361	mtacp1	4200.67	3268.94	5132.4	1.57005	0.65081	0.00108746	0.00906388
FBgn0011455	l(3)neo18	2426.22	2140.05	2712.4	1.26745	0.341928	0.197993	0.451643
FBgn0011474	pr-set7	4102.12	4576.65	3627.58	0.792627	-0.335286	0.0931311	0.273814
FBgn0011476	l(3)neo43	369.431	303.783	435.079	1.4322	0.518238	0.0966906	0.280528
FBgn0011481	Ssdp	10372.8	11713.5	9032.11	0.771083	-0.375042	0.0512963	0.180366
FBgn0011509	SrpRbeta	1880.51	2114.29	1646.73	0.778856	-0.360571	0.139269	0.36214
FBgn0011554	etaTry	1.12833	2.25665	0	0	#NAME?	0.709869	0.908604
FBgn0011555	thetaTry	2.41784	4.83568	0	0	#NAME?	0.572933	0.817414
FBgn0011556	zetaTry	2.25665	4.51331	0	0	#NAME?	0.577672	0.820514
FBgn0011559	Acp36DE	0	0	0	NA	NA	NA	NA
FBgn0011566	Bzd	514.183	486.462	541.904	1.11397	0.155712	0.42758	0.70212
FBgn0011569	can	0.470631	0.644758	0.296504	0.459869	-1.12071	0.995633	1
FBgn0011570	cpb	5469.35	6244.32	4694.37	0.751782	-0.411613	0.0432134	0.160503
FBgn0011571	caz	15873.4	17484.3	14262.4	0.815723	-0.293849	0.0960676	0.27972
FBgn0011573	Cdc37	5196.63	5375.72	5017.54	0.93337	-0.0994797	0.621481	0.852446
FBgn0011576	Cyp4d2	436.86	392.455	481.265	1.22629	0.294304	0.165575	0.404245
FBgn0011581	Dms	0.989219	1.97844	0	0	#NAME?	0.27797	0.553091
FBgn0011582	DopR	1.03776	0	2.07553	Inf	Inf	0.66713	0.881039
FBgn0011584	Trp1	5334.12	5503.93	5164.31	0.938295	-0.0918869	0.68926	0.893607
FBgn0011586	e(r)	5095.56	4179.67	6011.45	1.43826	0.524323	0.00535543	0.0330664
FBgn0011589	elk	9.96848	10.1704	9.76655	0.960292	-0.0584555	0.815337	0.9671
FBgn0011591	fng	6721.89	9494.53	3949.24	0.415949	-1.26552	9.80617e-09	2.68069e-07
FBgn0011592	fra	7221.34	9816.96	4625.71	0.471196	-1.0856	0.00106726	0.00894498
FBgn0011596	fzo	0	0	0	NA	NA	NA	NA
FBgn0011603	ine	44.5013	39.7145	49.2881	1.24106	0.311575	0.805853	0.961266
FBgn0011604	Iswi	11636.3	11130.8	12141.8	1.09083	0.125425	0.679435	0.888208
FBgn0011606	Klp3A	5623.13	5616.97	5629.28	1.00219	0.00315897	0.892667	1
FBgn0011638	La	13601.5	11583	15619.9	1.34851	0.43137	0.0307782	0.125346
FBgn0011640	lark	8708.74	9686.22	7731.25	0.798169	-0.325233	0.127162	0.339218
FBgn0011642	Zyx	5284.33	5729.24	4839.42	0.844688	-0.24351	0.805083	0.960891
FBgn0011648	Mad	3415.74	3936.12	2895.35	0.735584	-0.443037	0.0287658	0.118848
FBgn0011653	mas	2403.37	3898.54	908.196	0.232958	-2.10186	6.28411e-11	2.30243e-09
FBgn0011655	Med	1684.31	2042.91	1325.71	0.648933	-0.623859	0.00165907	0.0127971
FBgn0011656	Mef2	2387.35	2854.46	1920.23	0.672714	-0.571935	0.00298632	0.0208963
FBgn0011659	Mlh1	1264.12	841.291	1686.95	2.00519	1.00374	1.42756e-05	0.000210975
FBgn0011660	Pms2	1877.63	1903.62	1851.64	0.972695	-0.0399412	0.902139	1
FBgn0011661	Moe	40504.3	36880	44128.5	1.19654	0.258871	0.253714	0.525264
FBgn0011666	msi	976.561	988.517	964.605	0.975811	-0.035327	0.780165	0.948422
FBgn0011668	Mst57Da	0	0	0	NA	NA	NA	NA
FBgn0011669	Mst57Db	0	0	0	NA	NA	NA	NA
FBgn0011670	Mst57Dc	0	0	0	NA	NA	NA	NA
FBgn0011672	Mvl	1685.64	1842.17	1529.11	0.830062	-0.268709	0.37201	0.647715
FBgn0011674	insc	1269.19	443.581	2094.8	4.72249	2.23955	4.3832e-15	2.75307e-13
FBgn0011676	Nos	31.0958	9.74646	52.4451	5.38093	2.42786	1.49343e-08	3.95947e-07
FBgn0011692	pav	8072.49	7246.98	8897.99	1.22782	0.2961	0.166388	0.40548
FBgn0011693	Pdh	16.3821	12.5154	20.2488	1.61791	0.694134	0.675628	0.885838
FBgn0011694	PebII	0	0	0	NA	NA	NA	NA
FBgn0011695	PebIII	37.3352	44.2013	30.4692	0.689327	-0.53674	0.408021	0.681887
FBgn0011701	repo	16.5679	27.0666	6.06929	0.224236	-2.15691	0.00447088	0.0287488
FBgn0011703	RnrL	10020.6	8634.55	11406.6	1.32105	0.401681	0.0552587	0.189808
FBgn0011704	RnrS	7144.07	6471.21	7816.92	1.20795	0.272565	0.0964006	0.280012
FBgn0011705	rost	699.1	1128.35	269.846	0.23915	-2.06401	1.85746e-13	9.79998e-12
FBgn0011706	rpr	1071.94	465.246	1678.64	3.60807	1.85123	0.0361441	0.141224
FBgn0011708	Syx5	2046.12	1908.86	2183.39	1.14382	0.193855	0.314444	0.592508
FBgn0011710	Sep1	9450.13	10020.6	8879.66	0.886141	-0.174392	0.494943	0.757562
FBgn0011715	Snr1	3836.53	3894.86	3778.21	0.97005	-0.0438687	0.74814	0.930687
FBgn0011722	Tig	1034.87	325.705	1744.03	5.35464	2.42079	0.00158256	0.0123514
FBgn0011723	byn	16.8368	5.15806	28.5155	5.52834	2.46685	0.312342	0.59152
FBgn0011725	twin	3969.3	4496.34	3442.25	0.765567	-0.3854	0.0748206	0.234348
FBgn0011726	tsr	44350.5	42248.8	46452.2	1.09949	0.136834	0.322723	0.600441
FBgn0011737	wee	1727.97	1722.57	1733.37	1.00627	0.00902072	0.934676	1
FBgn0011739	wts	3179.76	4346.16	2013.37	0.463253	-1.11013	2.6946e-08	6.83496e-07
FBgn0011740	alpha-Man-II	3247.24	4315.45	2179.03	0.504937	-0.985826	1.70654e-05	0.000247355
FBgn0011741	Actr13E	3008.7	2920.82	3096.59	1.06018	0.0843083	0.843245	0.981028
FBgn0011742	Arp14D	6483.75	7457.54	5509.95	0.738843	-0.43666	0.0476313	0.17189
FBgn0011743	Arp53D	0	0	0	NA	NA	NA	NA
FBgn0011745	Arp87C	4082.56	4319.94	3845.18	0.890102	-0.167958	0.550637	0.799659
FBgn0011746	ana	769.381	1254.69	284.075	0.226411	-2.14298	3.62031e-08	9.00978e-07
FBgn0011747	Ank	17054.3	17573.3	16535.2	0.940925	-0.0878478	0.927557	1
FBgn0011754	PhKgamma	3768.54	4260.57	3276.5	0.769028	-0.378893	0.104965	0.296226
FBgn0011758	B-H1	194.403	369.027	19.7777	0.0535941	-4.22178	2.12395e-16	1.50415e-14
FBgn0011760	ctp	27124.8	29086	25163.7	0.865149	-0.208979	0.362009	0.640277
FBgn0011761	dhd	0.967137	1.93427	0	0	#NAME?	0.448193	0.718416
FBgn0011762	DNApol-alpha50	839.176	742.877	935.476	1.25926	0.332576	0.12485	0.334964
FBgn0011763	Dp	9797.5	9834.68	9760.31	0.992438	-0.0109508	0.985579	1
FBgn0011764	Dsp1	19813.7	20314.4	19313	0.950707	-0.072927	0.905672	1
FBgn0011766	E2f	12252.1	11078.3	13425.9	1.21191	0.277283	0.188311	0.43787
FBgn0011768	Fdh	7784.35	8124.57	7444.13	0.91625	-0.126187	0.730555	0.919906
FBgn0011769	Fdxh	358.455	292.473	424.437	1.4512	0.537245	0.196421	0.44901
FBgn0011770	Gip	899.596	845.897	953.294	1.12696	0.172439	0.601346	0.839301
FBgn0011771	Hem	3500.56	3862.93	3138.2	0.812389	-0.299757	0.135127	0.353986
FBgn0011774	Irbp	1096.14	622.179	1570.11	2.52356	1.33546	2.1375e-07	4.71859e-06
FBgn0011785	BRWD3	7325.43	7795.66	6855.19	0.87936	-0.185474	0.278563	0.553747
FBgn0011787	mRpL12	2353.94	1982.67	2725.22	1.37452	0.458928	0.0254842	0.108782
FBgn0011802	Gem3	1525.33	1254.02	1796.64	1.4327	0.518739	0.0166092	0.0798454
FBgn0011812	Lcp1Psi	1.63077	0	3.26155	Inf	Inf	0.330032	0.60819
FBgn0011817	nmo	4475.08	6691.46	2258.71	0.337551	-1.56682	0.00150654	0.0118546
FBgn0011818	oaf	2235.16	2019.42	2450.89	1.21366	0.279364	0.246934	0.516584
FBgn0011822	pcl	0	0	0	NA	NA	NA	NA
FBgn0011823	Pen	27919.1	26786	29052.2	1.08461	0.117171	0.746148	0.930106
FBgn0011824	CG4038	0	0	0	NA	NA	NA	NA
FBgn0011826	Pp2B-14D	3465.06	3810.97	3119.16	0.818468	-0.289002	0.0928868	0.273325
FBgn0011828	Pxn	570.441	351.769	789.113	2.24327	1.1656	0.166015	0.404787
FBgn0011829	Ret	52.3229	73.4098	31.236	0.425502	-1.23276	0.00309593	0.0214899
FBgn0011832	Ser12	0	0	0	NA	NA	NA	NA
FBgn0011834	Ser6	0	0	0	NA	NA	NA	NA
FBgn0011836	Taf2	2831.63	2809.32	2853.95	1.01589	0.022738	0.797366	0.955452
FBgn0011837	Tis11	4767.11	4731.87	4802.36	1.0149	0.0213332	0.721195	0.914339
FBgn0011840	tRNA:A:90C	0	0	0	NA	NA	NA	NA
FBgn0011844	tRNA:D2:69F	0	0	0	NA	NA	NA	NA
FBgn0011845	tRNA:D:96A	0	0	0	NA	NA	NA	NA
FBgn0011848	tRNA:E4:56Fa	0	0	0	NA	NA	NA	NA
FBgn0011849	tRNA:E4:56Fb	1.09007	0	2.18013	Inf	Inf	0.797147	0.955452
FBgn0011850	tRNA:E4:56Fc	0.348805	0	0.697611	Inf	Inf	0.987921	1
FBgn0011851	tRNA:E4:62Aa	0	0	0	NA	NA	NA	NA
FBgn0011852	tRNA:E4:62Ab	0	0	0	NA	NA	NA	NA
FBgn0011853	tRNA:E4:62Ac	0	0	0	NA	NA	NA	NA
FBgn0011854	tRNA:E4:62Ad	0	0	0	NA	NA	NA	NA
FBgn0011855	tRNA:E4:62Ae	0	0	0	NA	NA	NA	NA
FBgn0011858	tRNA:F2:89BC	0	0	0	NA	NA	NA	NA
FBgn0011859	tRNA:G3:22BCa	0	0	0	NA	NA	NA	NA
FBgn0011860	tRNA:G3:22BCb	0	0	0	NA	NA	NA	NA
FBgn0011861	tRNA:G3:28D	0	0	0	NA	NA	NA	NA
FBgn0011862	tRNA:G3:35Ba	0	0	0	NA	NA	NA	NA
FBgn0011863	tRNA:G3:35Bb	0	0	0	NA	NA	NA	NA
FBgn0011864	tRNA:G3:35Bc	0	0	0	NA	NA	NA	NA
FBgn0011865	tRNA:G3:35Bd	0	0	0	NA	NA	NA	NA
FBgn0011866	tRNA:G3:35Be	0	0	0	NA	NA	NA	NA
FBgn0011867	tRNA:G3:53E	0	0	0	NA	NA	NA	NA
FBgn0011868	tRNA:G3:55E	0	0	0	NA	NA	NA	NA
FBgn0011869	tRNA:G3:56EFa	0	0	0	NA	NA	NA	NA
FBgn0011870	tRNA:G3:56EFb	0	0	0	NA	NA	NA	NA
FBgn0011871	tRNA:G3:57BCa	0	0	0	NA	NA	NA	NA
FBgn0011872	tRNA:G3:57BCb	0	0	0	NA	NA	NA	NA
FBgn0011877	tRNA:HPsi	0	0	0	NA	NA	NA	NA
FBgn0011878	tRNA:H:48F	0.688921	1.37784	0	0	#NAME?	0.897047	1
FBgn0011879	tRNA:H:56E	0	0	0	NA	NA	NA	NA
FBgn0011880	tRNA:I:42A	0	0	0	NA	NA	NA	NA
FBgn0011881	tRNA:I:49Fa	0	0	0	NA	NA	NA	NA
FBgn0011882	tRNA:I:49Fb	0	0	0	NA	NA	NA	NA
FBgn0011883	tRNA:I:49Fc	0	0	0	NA	NA	NA	NA
FBgn0011884	tRNA:I:49Fd	0	0	0	NA	NA	NA	NA
FBgn0011885	tRNA:I:49Fe	0	0	0	NA	NA	NA	NA
FBgn0011887	tRNA:K2:42Aa	0	0	0	NA	NA	NA	NA
FBgn0011888	tRNA:K2:42Ab	0	0	0	NA	NA	NA	NA
FBgn0011889	tRNA:K2:42Ac	0	0	0	NA	NA	NA	NA
FBgn0011890	tRNA:K2:42Ad	0	0	0	NA	NA	NA	NA
FBgn0011891	tRNA:K2:42Ae	0	0	0	NA	NA	NA	NA
FBgn0011892	tRNA:K2:42Ea	0	0	0	NA	NA	NA	NA
FBgn0011893	tRNA:K2:42Eb	0	0	0	NA	NA	NA	NA
FBgn0011894	tRNA:K2:42Ec	0	0	0	NA	NA	NA	NA
FBgn0011895	tRNA:K2:42Ed	0	0	0	NA	NA	NA	NA
FBgn0011896	tRNA:K2:50C	0	0	0	NA	NA	NA	NA
FBgn0011897	tRNA:K2:56EF	0	0	0	NA	NA	NA	NA
FBgn0011902	tRNA:K5:29A	0	0	0	NA	NA	NA	NA
FBgn0011904	tRNA:K5:84ABa	0	0	0	NA	NA	NA	NA
FBgn0011905	tRNA:K5:87BC	0	0	0	NA	NA	NA	NA
FBgn0011906	tRNA:L2:44EF	0	0	0	NA	NA	NA	NA
FBgn0011909	tRNA:L3:49Fa	0	0	0	NA	NA	NA	NA
FBgn0011910	tRNA:L3:49Fb	0	0	0	NA	NA	NA	NA
FBgn0011915	tRNA:M2:48Ba	0	0	0	NA	NA	NA	NA
FBgn0011916	tRNA:M2:48Bb	0	0	0	NA	NA	NA	NA
FBgn0011919	tRNA:M2:83F	0	0	0	NA	NA	NA	NA
FBgn0011921	tRNA:M3:46A	0	0	0	NA	NA	NA	NA
FBgn0011927	tRNA:M3:70Fa	0	0	0	NA	NA	NA	NA
FBgn0011928	tRNA:M3:70Fb	0	0	0	NA	NA	NA	NA
FBgn0011931	tRNA:N5:42Aa	0	0	0	NA	NA	NA	NA
FBgn0011932	tRNA:N5:42Ab	0	0	0	NA	NA	NA	NA
FBgn0011933	tRNA:N5:42Ac	0	0	0	NA	NA	NA	NA
FBgn0011934	tRNA:N5:42Ad	0	0	0	NA	NA	NA	NA
FBgn0011935	tRNA:N5:42Ae	0	0	0	NA	NA	NA	NA
FBgn0011936	tRNA:N5:42Af	0	0	0	NA	NA	NA	NA
FBgn0011937	tRNA:N5:42Ag	0	0	0	NA	NA	NA	NA
FBgn0011938	tRNA:N5:42Ah	0	0	0	NA	NA	NA	NA
FBgn0011944	tRNA:P:90Ca	0	0	0	NA	NA	NA	NA
FBgn0011945	tRNA:P:90Cb	0	0	0	NA	NA	NA	NA
FBgn0011948	tRNA:R:12Ea	0	0	0	NA	NA	NA	NA
FBgn0011949	tRNA:R:12Eb	0	0	0	NA	NA	NA	NA
FBgn0011950	tRNA:R:12Ec	0	0	0	NA	NA	NA	NA
FBgn0011951	tRNA:R:12Ed	0	0	0	NA	NA	NA	NA
FBgn0011952	tRNA:R:12Ee	0	0	0	NA	NA	NA	NA
FBgn0011953	tRNA:R:12Ef	0	0	0	NA	NA	NA	NA
FBgn0011954	tRNA:R:19F	0	0	0	NA	NA	NA	NA
FBgn0011955	tRNA:R2:42Aa	0	0	0	NA	NA	NA	NA
FBgn0011956	tRNA:R2:42Ab	0.348805	0	0.697611	Inf	Inf	0.987921	1
FBgn0011957	tRNA:R2:42Ac	0	0	0	NA	NA	NA	NA
FBgn0011958	tRNA:R2:42Ad	0	0	0	NA	NA	NA	NA
FBgn0011959	tRNA:R2:84Fa	0	0	0	NA	NA	NA	NA
FBgn0011960	tRNA:R2:84Fb	0	0	0	NA	NA	NA	NA
FBgn0011961	tRNA:R2:84Fc	0	0	0	NA	NA	NA	NA
FBgn0011962	tRNA:R2:84Fd	0	0	0	NA	NA	NA	NA
FBgn0011963	tRNA:R2:84Fe	0	0	0	NA	NA	NA	NA
FBgn0011965	tRNA:R:83AB	0	0	0	NA	NA	NA	NA
FBgn0011966	tRNA:R:85Ca	0	0	0	NA	NA	NA	NA
FBgn0011970	tRNA:S2b:86A	0	0	0	NA	NA	NA	NA
FBgn0011971	tRNA:S2b:88A	0	0	0	NA	NA	NA	NA
FBgn0011974	tRNA:S474:12Eh	0	0	0	NA	NA	NA	NA
FBgn0011975	tRNA:S4:12Ea	0	0	0	NA	NA	NA	NA
FBgn0011976	tRNA:S4:12Eb	0	0	0	NA	NA	NA	NA
FBgn0011977	tRNA:S4:12Ee	0	0	0	NA	NA	NA	NA
FBgn0011980	tRNA:S774:12Ec	0	0	0	NA	NA	NA	NA
FBgn0011981	tRNA:S774:12Ef	0.697611	0	1.39522	Inf	Inf	0.903265	1
FBgn0011982	tRNA:S7:12Ed	1.7223	3.44461	0	0	#NAME?	0.708307	0.907471
FBgn0011983	tRNA:S7:12Eg	0	0	0	NA	NA	NA	NA
FBgn0011984	tRNA:S7:23Ea	0	0	0	NA	NA	NA	NA
FBgn0011985	tRNA:S7:23Eb	1.03773	1.37784	0.697611	0.506307	-0.981917	0.998934	1
FBgn0011986	tRNA:S7:64D	0	0	0	NA	NA	NA	NA
FBgn0011987	tRNA:SeC	0.322379	0.644758	0	0	#NAME?	0.775389	0.945448
FBgn0011993	tRNA:T:90Ca	0	0	0	NA	NA	NA	NA
FBgn0011994	tRNA:T:90Cb	0	0	0	NA	NA	NA	NA
FBgn0011998	tRNA:V3b:84Da	0	0	0	NA	NA	NA	NA
FBgn0011999	tRNA:V3b:84Db	0	0	0	NA	NA	NA	NA
FBgn0012000	tRNA:V3b:84Dc	0	0	0	NA	NA	NA	NA
FBgn0012001	tRNA:V3b:84Dd	0	0	0	NA	NA	NA	NA
FBgn0012002	tRNA:V3b:90BC	0	0	0	NA	NA	NA	NA
FBgn0012003	tRNA:V3b:92Ba	0	0	0	NA	NA	NA	NA
FBgn0012004	tRNA:V3b:92Bb	0	0	0	NA	NA	NA	NA
FBgn0012009	tRNA:V4:70BCa	0	0	0	NA	NA	NA	NA
FBgn0012010	tRNA:V4:70BCb	0	0	0	NA	NA	NA	NA
FBgn0012011	tRNA:V4:89BC	0	0	0	NA	NA	NA	NA
FBgn0012016	tRNA:Y1:22Fa	0	0	0	NA	NA	NA	NA
FBgn0012017	tRNA:Y1:22Fb	0	0	0	NA	NA	NA	NA
FBgn0012018	tRNA:Y1:28C	0	0	0	NA	NA	NA	NA
FBgn0012024	tRNA:Y1:85Aa	0	0	0	NA	NA	NA	NA
FBgn0012025	tRNA:Y1:85Ab	0	0	0	NA	NA	NA	NA
FBgn0012026	tRNA:Y1:85Ac	0	0	0	NA	NA	NA	NA
FBgn0012027	tRNA:Y1:85Ad	0	0	0	NA	NA	NA	NA
FBgn0012028	tRNA:Y1:85Ae	0	0	0	NA	NA	NA	NA
FBgn0012034	AcCoAS	739.54	149.999	1329.08	8.86059	3.1474	6.10155e-37	2.07689e-34
FBgn0012036	Aldh	0	0	0	NA	NA	NA	NA
FBgn0012037	Ance	11946.3	22007.8	1884.77	0.085641	-3.54555	5.82688e-14	3.21912e-12
FBgn0012042	AttA	4.05435	7.81219	0.296504	0.0379541	-4.7196	0.0845682	0.255472
FBgn0012051	CalpA	3486.67	2516.54	4456.81	1.77101	0.824572	0.00168069	0.0129261
FBgn0012058	Cdc27	2791.79	2864.37	2719.22	0.949326	-0.0750246	0.656978	0.875639
FBgn0012344	Dh44	8.3307	4.19093	12.4705	2.97559	1.57318	0.535069	0.789061
FBgn0013263	Trl	10.7795	18.0709	3.48805	0.19302	-2.37318	0.0137757	0.0698179
FBgn0013269	FK506-bp1	18639.4	16626	20652.8	1.2422	0.3129	0.156237	0.388366
FBgn0013272	Gp150	39547.9	38910	40185.8	1.03279	0.0465456	0.95211	1
FBgn0013275	Hsp70Aa	2.58497	1.61189	3.55805	2.20737	1.14233	0.789136	0.950892
FBgn0013276	Hsp70Ab	1106.25	1466.28	746.211	0.508914	-0.974506	0.763229	0.938976
FBgn0013277	Hsp70Ba	7.90575	12.1488	3.66265	0.301482	-1.72986	0.381953	0.657804
FBgn0013278	Hsp70Bb	3318.87	4230.42	2407.31	0.569047	-0.81338	0.758815	0.936141
FBgn0013279	Hsp70Bc	831.463	966.334	696.591	0.72086	-0.472209	0.902271	1
FBgn0013300	Mst35Ba	0	0	0	NA	NA	NA	NA
FBgn0013301	Mst35Bb	0	0	0	NA	NA	NA	NA
FBgn0013303	Nca	2173.35	2276.35	2070.36	0.909509	-0.13684	0.77757	0.946672
FBgn0013305	Nmda1	2932.28	2297.51	3567.06	1.55257	0.634662	0.00149382	0.0117633
FBgn0013307	Odc1	3.54832	2.94557	4.15106	1.40925	0.494931	0.81575	0.967125
FBgn0013308	Odc2	0	0	0	NA	NA	NA	NA
FBgn0013323	Ptth	79.2355	14.2024	144.269	10.1581	3.34455	0.0299098	0.122424
FBgn0013325	RpL11	52819.1	44389.6	61248.6	1.3798	0.464455	0.012305	0.0638988
FBgn0013334	Sap47	3497.1	3103.6	3890.6	1.25358	0.326052	0.158703	0.392266
FBgn0013342	n-syb	10.7348	17.8943	3.57535	0.199804	-2.32334	0.0228797	0.10062
FBgn0013343	Syx1A	0	0	0	NA	NA	NA	NA
FBgn0013347	TfIIA-S	3439.42	3570.93	3307.92	0.926349	-0.110373	0.536675	0.790369
FBgn0013348	TpnC41C	1.36445	1.33368	1.39522	1.04614	0.0650825	0.994603	1
FBgn0013432	bcn92	1054.18	831.394	1276.96	1.53592	0.619106	0.047072	0.170221
FBgn0013433	beat-Ia	0.697611	0	1.39522	Inf	Inf	0.817174	0.967886
FBgn0013435	cdc2rk	668.414	698.168	638.661	0.914767	-0.128524	0.393049	0.667202
FBgn0013442	fos28F	0	0	0	NA	NA	NA	NA
FBgn0013467	igl	1.45985	2.6232	0.296504	0.113032	-3.1452	0.367359	0.644237
FBgn0013469	klu	2379.72	4001.89	757.546	0.189297	-2.40127	3.16403e-11	1.21407e-09
FBgn0013531	MED20	769.681	783.647	755.715	0.964357	-0.052361	0.866693	0.993196
FBgn0013548	l(2)dtl	1466.4	1327.7	1605.1	1.20893	0.27373	0.305292	0.584017
FBgn0013563	pex1	577.609	576.653	578.565	1.00332	0.00477694	0.810962	0.964634
FBgn0013576	l(3)82Fd	6549.75	7026.92	6072.58	0.864188	-0.210583	0.316219	0.593722
FBgn0013672	mt:ATPase6	2502.61	1832.68	3172.53	1.73109	0.791682	0.171783	0.413283
FBgn0013673	mt:ATPase8	0	0	0	NA	NA	NA	NA
FBgn0013674	mt:CoI	70602.3	58353.1	82851.5	1.41983	0.505719	0.200975	0.45616
FBgn0013675	mt:CoII	17272.6	11474.6	23070.7	2.0106	1.00762	0.044822	0.164394
FBgn0013676	mt:CoIII	27237.7	22676	31799.3	1.40234	0.487832	0.269548	0.542309
FBgn0013678	mt:Cyt-b	2709.02	1708.37	3709.66	2.17147	1.11867	0.0948121	0.277135
FBgn0013679	mt:ND1	4202.78	2591.22	5814.34	2.24386	1.16599	0.00947077	0.0523223
FBgn0013680	mt:ND2	1205.59	990.818	1420.36	1.43352	0.519564	0.452509	0.722153
FBgn0013681	mt:ND3	0.322379	0.644758	0	0	#NAME?	0.959931	1
FBgn0013683	mt:ND4L	0	0	0	NA	NA	NA	NA
FBgn0013684	mt:ND5	1540.92	1033.75	2048.08	1.98121	0.986382	0.0879277	0.262993
FBgn0013685	mt:ND6	144.811	79.9589	209.662	2.62213	1.39074	0.467576	0.734424
FBgn0013686	mt:lrRNA	5210.96	3626.46	6795.45	1.87385	0.906006	0.512908	0.7713
FBgn0013687	mt:ori	52.1554	21.9527	82.3582	3.75162	1.90751	0.608577	0.844484
FBgn0013688	mt:srRNA	0	0	0	NA	NA	NA	NA
FBgn0013689	mt:tRNA:A	5.34138	0.688921	9.99384	14.5065	3.85863	0.199008	0.453256
FBgn0013690	mt:tRNA:C	0	0	0	NA	NA	NA	NA
FBgn0013691	mt:tRNA:D	0	0	0	NA	NA	NA	NA
FBgn0013692	mt:tRNA:E	0	0	0	NA	NA	NA	NA
FBgn0013693	mt:tRNA:F	0	0	0	NA	NA	NA	NA
FBgn0013694	mt:tRNA:G	0	0	0	NA	NA	NA	NA
FBgn0013695	mt:tRNA:H	0	0	0	NA	NA	NA	NA
FBgn0013696	mt:tRNA:I	0	0	0	NA	NA	NA	NA
FBgn0013697	mt:tRNA:K	0	0	0	NA	NA	NA	NA
FBgn0013698	mt:tRNA:L:CUN	0	0	0	NA	NA	NA	NA
FBgn0013699	mt:tRNA:L:UUR	0	0	0	NA	NA	NA	NA
FBgn0013700	mt:tRNA:M	0	0	0	NA	NA	NA	NA
FBgn0013701	mt:tRNA:N	0	0	0	NA	NA	NA	NA
FBgn0013702	mt:tRNA:P	0	0	0	NA	NA	NA	NA
FBgn0013703	mt:tRNA:Q	0	0	0	NA	NA	NA	NA
FBgn0013704	mt:tRNA:R	0	0	0	NA	NA	NA	NA
FBgn0013705	mt:tRNA:S:AGY	0	0	0	NA	NA	NA	NA
FBgn0013706	mt:tRNA:S:UCN	0	0	0	NA	NA	NA	NA
FBgn0013707	mt:tRNA:T	0	0	0	NA	NA	NA	NA
FBgn0013708	mt:tRNA:V	0	0	0	NA	NA	NA	NA
FBgn0013709	mt:tRNA:W	0	0	0	NA	NA	NA	NA
FBgn0013710	mt:tRNA:Y	0	0	0	NA	NA	NA	NA
FBgn0013717	not	2450.3	2981.62	1918.98	0.643604	-0.635755	0.00618297	0.0372602
FBgn0013718	nuf	7389.08	6794.38	7983.77	1.17506	0.232728	0.205946	0.462667
FBgn0013720	pck	6860.43	6323.36	7397.49	1.16987	0.226345	0.302117	0.580153
FBgn0013725	phyl	132.916	123.25	142.582	1.15685	0.210202	0.710706	0.908816
FBgn0013726	pnut	15082.9	13440.5	16725.3	1.24439	0.315439	0.161836	0.397785
FBgn0013732	sced	1252.88	1360.76	1145	0.841443	-0.249063	0.215946	0.476609
FBgn0013733	shot	14722.9	14387.5	15058.3	1.04662	0.0657381	0.970309	1
FBgn0013746	alien	4429.88	4634.66	4225.1	0.91163	-0.13348	0.646627	0.868314
FBgn0013749	Arf102F	3972.96	4289.66	3656.27	0.852346	-0.230489	0.614452	0.847875
FBgn0013750	Arf51F	4293.7	4090.46	4496.94	1.09937	0.13668	0.309522	0.588455
FBgn0013751	Awh	91.9507	162.501	21.4002	0.131693	-2.92475	0.000434145	0.00421057
FBgn0013753	Bgb	2437.1	2732.49	2141.72	0.783798	-0.351446	0.117223	0.320864
FBgn0013755	Bro	1.98713	2.57903	1.39522	0.540987	-0.886335	0.611218	0.845898
FBgn0013756	Mtor	12891.5	13186.7	12596.3	0.955232	-0.0660775	0.691621	0.895238
FBgn0013759	CASK	3262.5	3971.43	2553.57	0.642985	-0.637143	0.0034895	0.0236792
FBgn0013762	Cdk5	931.113	723.654	1138.57	1.57337	0.653856	0.00401522	0.0263979
FBgn0013763	CG5210	0	0	0	NA	NA	NA	NA
FBgn0013764	Chi	3022.79	3291.06	2754.51	0.836968	-0.256755	0.337757	0.615333
FBgn0013765	cnn	4417.35	3489.43	5345.28	1.53185	0.615277	0.00385582	0.0255569
FBgn0013767	Crz	0.967137	1.93427	0	0	#NAME?	0.431415	0.705774
FBgn0013770	Cp1	7549.45	6616.12	8482.78	1.28214	0.358553	0.0823971	0.250993
FBgn0013771	Cyp6a9	9.68611	5.52461	13.8476	2.50653	1.32569	0.814983	0.96698
FBgn0013772	Cyp6a8	0.322379	0.644758	0	0	#NAME?	0.738639	0.925887
FBgn0013773	Cyp6a22	2.44164	0	4.88328	Inf	Inf	0.0992403	0.285946
FBgn0013799	Deaf1	2271.25	2627.38	1915.13	0.728911	-0.456185	0.0238349	0.103756
FBgn0013809	Dhc16F	33.5409	24.386	42.6958	1.75083	0.808041	0.349568	0.629138
FBgn0013810	Dhc36C	5.98119	7.0791	4.88328	0.689816	-0.535717	0.601051	0.839149
FBgn0013811	Dhc62B	93.4978	90.2353	96.7603	1.07231	0.100722	0.627489	0.857122
FBgn0013812	Dhc93AB	68.4659	131.769	5.16248	0.0391782	-4.67381	1.24109e-13	6.68164e-12
FBgn0013813	Dhc98D	2.13639	2.38914	1.88363	0.788411	-0.342979	1	1
FBgn0013948	Eip93F	19.0745	28.6962	9.45274	0.329408	-1.60205	0.159632	0.393836
FBgn0013949	Ela	10.748	11.694	9.80194	0.838205	-0.254625	0.847077	0.983317
FBgn0013953	Esp	17.2613	16.3839	18.1387	1.1071	0.146787	0.969923	1
FBgn0013954	FK506-bp2	16271.9	15316.9	17226.9	1.1247	0.169537	0.364714	0.642244
FBgn0013955	PR2	7561.31	8421.3	6701.32	0.795758	-0.329598	0.092273	0.271897
FBgn0013972	Gycalpha99B	0	0	0	NA	NA	NA	NA
FBgn0013973	Gycbeta100B	0.697611	0	1.39522	Inf	Inf	0.752431	0.932431
FBgn0013981	His4r	32087.8	29554.1	34621.6	1.17147	0.228317	0.173836	0.416511
FBgn0013983	imd	622.222	740.912	503.532	0.679611	-0.557219	0.190644	0.440867
FBgn0013984	InR	5329.71	5420.82	5238.6	0.966385	-0.04933	0.980242	1
FBgn0013987	MAPk-Ak2	7167.79	6342.09	7993.49	1.26039	0.333867	0.0873766	0.26156
FBgn0013988	Strn-Mlck	598.465	551.52	645.41	1.17024	0.226802	0.898579	1
FBgn0013995	Calx	10.9635	19.2412	2.68584	0.139588	-2.84075	0.00955052	0.0526251
FBgn0013997	Nrx-IV	16275.6	17796.1	14755.1	0.829118	-0.27035	0.209141	0.467456
FBgn0013998	Nsf2	2308.25	2544.72	2071.78	0.814146	-0.29664	0.124597	0.334541
FBgn0014000	Hf	4.67449	9.34899	0	0	#NAME?	0.0682628	0.219942
FBgn0014001	Pak	3746.25	3606.61	3885.89	1.07743	0.107599	0.908455	1
FBgn0014002	Pdi	37513.4	50694.4	24332.3	0.47998	-1.05895	7.52231e-06	0.000121369
FBgn0014006	Pk92B	3789.16	3790.6	3787.71	0.999239	-0.00109902	0.969415	1
FBgn0014007	Ptp69D	5010.81	5063.78	4957.85	0.979082	-0.0304986	0.990892	1
FBgn0014009	Rab2	3971.41	2982.99	4959.82	1.6627	0.733527	0.000204235	0.00219012
FBgn0014010	Rab5	8123.29	8696.81	7549.78	0.86811	-0.204051	0.40049	0.67413
FBgn0014011	Rac2	0	0	0	NA	NA	NA	NA
FBgn0014018	Rel	0	0	0	NA	NA	NA	NA
FBgn0014019	Rh5	11.351	15.3594	7.34261	0.478053	-1.06476	0.426613	0.701187
FBgn0014020	Rho1	31058.8	23429.8	38687.8	1.65123	0.723539	0.000754996	0.00666837
FBgn0014022	Rlb1	877.172	806.333	948.012	1.17571	0.23353	0.600423	0.838606
FBgn0014023	Rlc1	1457.24	1403.52	1510.97	1.07656	0.106429	0.71609	0.911929
FBgn0014024	Rnp4F	3687.49	4219.14	3155.84	0.74798	-0.418928	0.0390129	0.149148
FBgn0014026	RpL7A	140278	130355	150200	1.15224	0.20444	0.313124	0.59186
FBgn0014028	SdhB	2909.74	2651.04	3168.44	1.19517	0.257212	0.502953	0.763251
FBgn0014029	Sep2	5590.7	4782.9	6398.49	1.33778	0.419846	0.0498542	0.177085
FBgn0014031	Spat	217.781	240.504	195.059	0.811043	-0.30215	0.561462	0.809143
FBgn0014032	Sptr	987.935	875.879	1099.99	1.25587	0.32869	0.109073	0.304727
FBgn0014033	Sr-CI	210.701	54.5219	366.88	6.72903	2.7504	0.000741953	0.00657907
FBgn0014037	Su(Tpl)	0	0	0	NA	NA	NA	NA
FBgn0014073	Tie	541.394	884.87	197.919	0.223671	-2.16055	2.40357e-08	6.18596e-07
FBgn0014075	Ugt	6725.44	7911.36	5539.53	0.7002	-0.514162	0.0285274	0.118326
FBgn0014076	Vm32E	0	0	0	NA	NA	NA	NA
FBgn0014092	CG4278	1555.59	1454.75	1656.43	1.13863	0.187304	0.330295	0.60857
FBgn0014127	barr	4420.41	4152.79	4688.03	1.12889	0.174902	0.439461	0.71119
FBgn0014133	bif	10394.6	11295.6	9493.69	0.840479	-0.250716	0.166542	0.405762
FBgn0014135	bnl	370.888	396.964	344.812	0.868622	-0.203199	0.951115	1
FBgn0014141	cher	19221.8	12282.8	26160.7	2.12987	1.09076	0.103028	0.29249
FBgn0014143	croc	238.139	0	476.277	Inf	Inf	1.3214e-16	9.5503e-15
FBgn0014163	fax	70768.5	97947.4	43589.5	0.44503	-1.16803	6.26984e-08	1.51049e-06
FBgn0014179	gcm	76.8105	9.43732	144.184	15.278	3.93339	1.07789e-05	0.000166529
FBgn0014184	Oda	25566.4	23859.3	27273.5	1.14309	0.192943	0.305872	0.584386
FBgn0014189	Hel25E	15678.6	17646.7	13710.4	0.776937	-0.36413	0.132361	0.34882
FBgn0014269	prod	2245.71	2296.53	2194.89	0.955741	-0.0653081	0.633883	0.860573
FBgn0014340	mof	1583.63	1568.53	1598.74	1.01926	0.0275239	1	1
FBgn0014342	mia	778.637	607.009	950.265	1.56549	0.64661	0.0137086	0.0696021
FBgn0014343	mirr	5158.94	7189.82	3128.06	0.435068	-1.20069	1.10176e-07	2.52734e-06
FBgn0014366	noi	3221.97	3468.84	2975.11	0.857668	-0.221509	0.261541	0.533399
FBgn0014368	nol	0	0	0	NA	NA	NA	NA
FBgn0014380	RhoL	599.481	609.672	589.289	0.966567	-0.0490585	0.591744	0.832881
FBgn0014388	sty	5661.83	5090.59	6233.07	1.22443	0.29211	0.316279	0.593722
FBgn0014391	sun	4226.96	3501.66	4952.25	1.41426	0.500045	0.010607	0.0573973
FBgn0014395	tilB	87.3918	56.2353	118.548	2.10807	1.07592	0.113099	0.312495
FBgn0014396	tim	5.15579	9.61397	0.697611	0.0725622	-3.78464	0.0251657	0.107815
FBgn0014411	Vps26	3225.4	3470.74	2980.05	0.858621	-0.219907	0.344687	0.62384
FBgn0014417	CG13397	225.498	199.535	251.462	1.26024	0.333695	0.477499	0.740531
FBgn0014427	CG11899	3490.73	5388.51	1592.94	0.295619	-1.75819	7.07379e-08	1.69258e-06
FBgn0014454	Acp1	0	0	0	NA	NA	NA	NA
FBgn0014455	Ahcy13	5119.75	3809.1	6430.39	1.68817	0.755458	0.000461874	0.0044387
FBgn0014464	Cp7Fa	0	0	0	NA	NA	NA	NA
FBgn0014465	Cp7Fb	0	0	0	NA	NA	NA	NA
FBgn0014466	Cp7Fc	0	0	0	NA	NA	NA	NA
FBgn0014467	CrebB-17A	3607.53	3187.66	4027.41	1.26344	0.337354	0.153802	0.384847
FBgn0014469	Cyp4e2	400.791	476.658	324.925	0.681672	-0.552849	0.425276	0.699753
FBgn0014848	Eig71Eh	0	0	0	NA	NA	NA	NA
FBgn0014849	Eig71Ei	0	0	0	NA	NA	NA	NA
FBgn0014850	Eig71Ej	0	0	0	NA	NA	NA	NA
FBgn0014851	Eig71Ek	0	0	0	NA	NA	NA	NA
FBgn0014857	His3.3A	7262.1	6836.36	7687.84	1.12455	0.16935	0.381853	0.65774
FBgn0014859	Hr38	41.3211	29.5176	53.1246	1.79976	0.847805	0.209518	0.467902
FBgn0014861	Mcm2	5337.04	4708.35	5965.74	1.26705	0.341478	0.0979656	0.283214
FBgn0014863	Mlp84B	0	0	0	NA	NA	NA	NA
FBgn0014865	Mtk	2.04371	2.90141	1.18602	0.408772	-1.29063	0.858191	0.98969
FBgn0014868	Ost48	7401.26	8838.23	5964.28	0.674827	-0.567409	0.0159818	0.0778936
FBgn0014869	Pglym78	1671.53	1917.58	1425.47	0.74337	-0.427847	0.0294897	0.120986
FBgn0014870	Psi	10661.2	11646.8	9675.62	0.83075	-0.267514	0.229668	0.493978
FBgn0014877	Roe1	1334.97	1218.89	1451.04	1.19046	0.251519	0.319191	0.59623
FBgn0014879	Set	13405	13530.2	13279.7	0.981482	-0.0269661	0.948127	1
FBgn0014903	CG14630	0	0	0	NA	NA	NA	NA
FBgn0014906	Hydr2	2152.43	2022.2	2282.66	1.1288	0.174787	0.65644	0.875341
FBgn0014930	CG2846	944.875	683.034	1206.72	1.7667	0.821058	0.000567967	0.005285
FBgn0014931	CG2678	31.2787	28.0073	34.5502	1.23362	0.302894	0.739647	0.9266
FBgn0014949	btn	4.3279	4.19093	4.46487	1.06536	0.0913477	0.872811	0.995728
FBgn0015000	betaggt-I	1277.03	1236.32	1317.74	1.06585	0.0920072	0.894245	1
FBgn0015001	iotaTry	7.36394	14.7279	0	0	#NAME?	0.000591568	0.00546126
FBgn0015008	Actn3	0	0	0	NA	NA	NA	NA
FBgn0015010	Ag5r	7.01286	14.0257	0	0	#NAME?	0.000173725	0.0019276
FBgn0015011	Ahcy89E	64.2551	105.104	23.4057	0.22269	-2.16689	0.0210653	0.09487
FBgn0015014	tgo	3023.32	3404.32	2642.32	0.776167	-0.36556	0.0435639	0.161133
FBgn0015019	Cctgamma	15445.5	14790.5	16100.6	1.08858	0.122446	0.609233	0.84476
FBgn0015024	CkIalpha	17490.8	18479.5	16502.1	0.892994	-0.163278	0.572762	0.817365
FBgn0015025	CkIIalpha-i1	298.344	261.648	335.039	1.28049	0.356698	0.283419	0.559347
FBgn0015031	cype	2847.16	2415.65	3278.66	1.35726	0.440696	0.0222069	0.0986125
FBgn0015032	Cyp4c3	0.348805	0	0.697611	Inf	Inf	0.989053	1
FBgn0015033	Cyp4d8	1.14237	0	2.28473	Inf	Inf	0.288672	0.563896
FBgn0015034	Cyp4e1	113.161	22.6151	203.708	9.00758	3.17114	4.35917e-06	7.43414e-05
FBgn0015035	Cyp4e3	1.81725	3.6345	0	0	#NAME?	0.220765	0.4821
FBgn0015036	Cyp4ae1	321.562	286.666	356.457	1.24346	0.314358	0.255616	0.52656
FBgn0015037	Cyp4p1	0	0	0	NA	NA	NA	NA
FBgn0015038	Cyp9b1	3.40706	6.81412	0	0	#NAME?	0.0629179	0.207992
FBgn0015039	Cyp9b2	7.31977	14.6395	0	0	#NAME?	0.0106435	0.0575139
FBgn0015040	Cyp9c1	0	0	0	NA	NA	NA	NA
FBgn0015075	Ddx1	2031.36	2381.82	1680.91	0.705725	-0.502822	0.0137164	0.0696021
FBgn0015129	DopR2	1.74403	0	3.48805	Inf	Inf	0.355028	0.634207
FBgn0015218	eIF-4E	15125	14836.1	15413.9	1.03895	0.0551193	0.908419	1
FBgn0015221	Fer2LCH	8217.96	6332.34	10103.6	1.59555	0.674054	0.00207639	0.0154405
FBgn0015222	Fer1HCH	9495.48	7600.25	11390.7	1.49873	0.583738	0.0109898	0.0587758
FBgn0015229	glec	1668.02	2365.72	970.325	0.410161	-1.28574	9.28491e-08	2.18693e-06
FBgn0015230	Glut3	0	0	0	NA	NA	NA	NA
FBgn0015239	Hr78	4807.6	6252.59	3362.61	0.537794	-0.894874	9.33155e-05	0.00112149
FBgn0015240	Hr96	781.779	714.313	849.245	1.1889	0.249624	0.532378	0.786236
FBgn0015245	Hsp60	17826.6	16527.2	19126	1.15725	0.210694	0.417239	0.690946
FBgn0015247	Iap2	1902.98	1684.64	2121.33	1.25922	0.332532	0.103711	0.29367
FBgn0015268	Nap1	34110.5	27691.2	40529.9	1.46364	0.549563	0.00804166	0.0461423
FBgn0015269	Nf1	2797.56	2912.3	2682.81	0.921199	-0.118416	0.6336	0.860573
FBgn0015270	Orc2	1218.23	1194.01	1242.45	1.04057	0.0573782	0.865611	0.993034
FBgn0015271	Orc5	874.222	844.797	903.647	1.06966	0.0971532	0.668492	0.881618
FBgn0015277	Pi3K59F	1024.66	916.061	1133.27	1.23711	0.306971	0.456254	0.725277
FBgn0015278	Pi3K68D	3765.06	3861.22	3668.9	0.950192	-0.0737091	0.474659	0.738694
FBgn0015279	Pi3K92E	4701.59	4371.37	5031.81	1.15108	0.202993	0.462456	0.730515
FBgn0015282	Pros26.4	8036.13	9178.65	6893.6	0.751048	-0.413023	0.0796742	0.246691
FBgn0015283	Pros54	5236.74	5660.87	4812.62	0.850156	-0.234201	0.324737	0.602219
FBgn0015286	Rala	3497.37	3495.82	3498.93	1.00089	0.00128303	0.622696	0.853558
FBgn0015288	RpL22	29201.6	25805.5	32597.8	1.26321	0.337099	0.443773	0.71568
FBgn0015295	shark	1779.49	1961.15	1597.82	0.814736	-0.295596	0.123158	0.331269
FBgn0015296	Shc	2321.28	2079.22	2563.35	1.23284	0.301986	0.251542	0.523009
FBgn0015298	Srp19	1627.71	1581.18	1674.25	1.05886	0.0825142	0.687923	0.893025
FBgn0015299	Ssb-c31a	2551.56	2093.23	3009.89	1.43792	0.523981	0.0102108	0.0556241
FBgn0015300	Ssl	0	0	0	NA	NA	NA	NA
FBgn0015316	Try29F	153.661	133.121	174.201	1.30859	0.388015	0.250672	0.52192
FBgn0015320	UbcD2	5123.05	4955.35	5290.75	1.06768	0.094484	0.498815	0.760072
FBgn0015321	UbcD4	3346.91	3155.55	3538.27	1.12129	0.165155	0.413616	0.687011
FBgn0015323	VAChT	0	0	0	NA	NA	NA	NA
FBgn0015324	Vha26	8884.97	7967.12	9802.82	1.23041	0.299139	0.143494	0.368454
FBgn0015331	abs	1540.84	1672.7	1408.98	0.842338	-0.247529	0.507834	0.766833
FBgn0015336	CG15865	0	0	0	NA	NA	NA	NA
FBgn0015338	CG5861	1789.73	1892.34	1687.11	0.891547	-0.165617	0.649285	0.869775
FBgn0015351	CG14906	0	0	0	NA	NA	NA	NA
FBgn0015359	CG2034	1329.04	1299.45	1358.62	1.04554	0.064243	0.781813	0.949321
FBgn0015360	oxt	639.872	618.456	661.289	1.06926	0.0966083	0.420194	0.693987
FBgn0015371	chn	8581.13	5838.59	11323.7	1.93946	0.955652	0.000609722	0.0055946
FBgn0015372	chrw	726.564	693.111	760.017	1.09653	0.132944	0.909734	1
FBgn0015374	crl	2340	2451.36	2228.65	0.909147	-0.137415	0.572617	0.817365
FBgn0015376	cutlet	1157.32	1031.05	1283.59	1.24494	0.316074	0.201247	0.456592
FBgn0015379	dod	2160.92	2274.79	2047.05	0.899885	-0.152187	0.577008	0.820123
FBgn0015380	drl	6522.03	11757.3	1286.72	0.10944	-3.19179	2.4515e-38	9.23864e-36
FBgn0015381	dsf	0.348805	0	0.697611	Inf	Inf	0.987921	1
FBgn0015391	glu	7331.42	6689.65	7973.18	1.19187	0.253224	0.363972	0.641602
FBgn0015393	hoip	6408.93	5194.8	7623.07	1.46744	0.553303	0.00468334	0.0298602
FBgn0015396	jumu	8966.69	8235.07	9698.3	1.17768	0.235951	0.415527	0.689192
FBgn0015399	kek1	9233.32	6762.19	11704.4	1.73087	0.791494	0.000152629	0.00171152
FBgn0015400	kek2	37.4867	73.2817	1.69173	0.0230852	-5.43689	2.06188e-11	8.11828e-10
FBgn0015402	ksr	0	0	0	NA	NA	NA	NA
FBgn0015477	Rme-8	5103.77	5521.14	4686.41	0.848812	-0.236483	0.225119	0.488329
FBgn0015509	lin19	7886.57	9078.32	6694.83	0.737452	-0.439379	0.0345761	0.136391
FBgn0015513	mbc	5674.87	4415.89	6933.84	1.5702	0.650952	0.00203432	0.0151597
FBgn0015519	nAcRalpha-7E	285.167	213.455	356.879	1.67192	0.741506	0.0724004	0.229834
FBgn0015520	nonA-l	1242.52	1377.11	1107.93	0.804531	-0.313781	0.162679	0.399299
FBgn0015521	RpS21	33704	27364.8	40043.2	1.46331	0.549238	0.0175565	0.0834086
FBgn0015522	olf186-M	0	0	0	NA	NA	NA	NA
FBgn0015524	otp	11.4623	12.6169	10.3077	0.816969	-0.291647	0.823573	0.971781
FBgn0015527	pen	5477.71	4489.41	6466.02	1.44028	0.526351	0.0206971	0.0936066
FBgn0015541	sda	9404.71	5249.65	13559.8	2.58298	1.36904	0.000630511	0.0057603
FBgn0015542	sima	8611.75	9482.99	7740.51	0.816251	-0.292915	0.152152	0.382675
FBgn0015543	snoRNA:Me28S-A1322	0	0	0	NA	NA	NA	NA
FBgn0015544	spag	1352.12	1183.79	1520.46	1.2844	0.361091	0.129517	0.343727
FBgn0015546	spel1	3189.19	2866.76	3511.61	1.22494	0.292711	0.153881	0.384847
FBgn0015550	tap	5.1705	1.93427	8.40672	4.34619	2.11975	0.360151	0.638708
FBgn0015553	tos	0	0	0	NA	NA	NA	NA
FBgn0015558	tty	90.7147	130.449	50.9806	0.390809	-1.35546	0.0248142	0.106786
FBgn0015561	unpg	131.495	57.3614	205.628	3.58477	1.84188	0.000636035	0.00580574
FBgn0015562	veg	563.217	368.303	758.131	2.05844	1.04155	0.0020824	0.0154634
FBgn0015565	yin	67.4329	109.786	25.0802	0.228447	-2.13007	0.000113414	0.00131945
FBgn0015568	alpha-Est1	10.4721	12.5728	8.37133	0.66583	-0.586775	0.372043	0.647715
FBgn0015569	alpha-Est10	182.853	84.7858	280.919	3.31328	1.72826	2.83133e-05	0.000393404
FBgn0015570	alpha-Est2	9.57383	13.5841	5.56358	0.409566	-1.28783	0.169578	0.409942
FBgn0015571	alpha-Est3	432.876	327.233	538.519	1.64568	0.718681	0.0187928	0.0875118
FBgn0015572	alpha-Est4	33.2653	22.8934	43.6372	1.90611	0.93063	0.0827769	0.251936
FBgn0015574	alpha-Est6	0.161189	0.322379	0	0	#NAME?	0.99773	1
FBgn0015575	alpha-Est7	12.6946	18.9188	6.4704	0.342009	-1.54789	0.0741619	0.233181
FBgn0015576	alpha-Est8	6.63302	9.48148	3.78456	0.399153	-1.32499	0.0841442	0.254628
FBgn0015577	alpha-Est9	55.6596	18.9365	92.3827	4.87855	2.28645	0.0525118	0.18323
FBgn0015582	dare	556.827	527.625	586.029	1.11069	0.15146	0.574633	0.818511
FBgn0015583	Acp29AB	0	0	0	NA	NA	NA	NA
FBgn0015584	Acp53Ea	0.688921	1.37784	0	0	#NAME?	0.869265	0.994414
FBgn0015585	Acp63F	0	0	0	NA	NA	NA	NA
FBgn0015586	Acp76A	1.04642	0	2.09283	Inf	Inf	0.748943	0.931171
FBgn0015589	Apc	2999.9	2582.92	3416.89	1.32288	0.403679	0.133668	0.351563
FBgn0015591	Ast	19.9363	35.687	4.18566	0.117288	-3.09187	3.22453e-05	0.000440741
FBgn0015600	toc	3434.5	4000.04	2868.95	0.717231	-0.479491	0.08824	0.263695
FBgn0015602	BEAF-32	3643.4	3480.48	3806.32	1.09362	0.12911	0.436968	0.710394
FBgn0015609	CadN	1281.35	2073.56	489.129	0.235888	-2.08382	8.91888e-06	0.000140631
FBgn0015614	CanB2	3276.42	3190.89	3361.94	1.0536	0.0753324	0.524084	0.779411
FBgn0015615	Cap	4838.35	4709.77	4966.93	1.0546	0.0766968	0.796888	0.955433
FBgn0015618	Cdk8	816.715	891.238	742.193	0.832766	-0.264017	0.239171	0.506675
FBgn0015621	Clp	952.562	878.029	1027.09	1.16977	0.226228	0.235199	0.50148
FBgn0015622	Cnx99A	7269.24	8975.14	5563.34	0.619861	-0.689984	0.00121966	0.00998434
FBgn0015623	Cpr	3034.59	3902.8	2166.37	0.555082	-0.849228	1.11407e-05	0.000171116
FBgn0015625	CycB3	3624.11	3778.04	3470.18	0.918514	-0.122627	0.429487	0.704046
FBgn0015663	Dot	297.069	299.636	294.503	0.982867	-0.0249321	0.920732	1
FBgn0015664	Dref	5755.17	5907.82	5602.53	0.948324	-0.0765476	0.774917	0.945309
FBgn0015714	Cyp6a17	1436.5	4.68996	2868.31	611.585	9.25641	7.03073e-26	1.17759e-23
FBgn0015721	king-tubby	8.9331	11.535	6.33119	0.548867	-0.86547	0.961113	1
FBgn0015737	Hmu	9515.97	11269	7762.91	0.688872	-0.537691	0.0104987	0.0568988
FBgn0015754	Lis-1	7049.02	6821.24	7276.79	1.06678	0.0932673	0.563474	0.810998
FBgn0015756	RpL9	61358.4	53889.9	68826.9	1.27718	0.352958	0.101756	0.290355
FBgn0015765	Mpk2	719.459	712.216	726.703	1.02034	0.0290513	0.860868	0.9905
FBgn0015766	Msr-110	14169.4	19144.2	9194.5	0.480276	-1.05807	3.60571e-06	6.30969e-05
FBgn0015770	MstProx	0	0	0	NA	NA	NA	NA
FBgn0015772	Nak	2389.61	2549.09	2230.13	0.87487	-0.19286	0.337623	0.615312
FBgn0015773	NetA	361.09	703.012	19.1674	0.0272647	-5.19682	4.31076e-20	3.9901e-18
FBgn0015774	NetB	1782.51	2470.9	1094.11	0.442798	-1.17528	0.00522202	0.0323924
FBgn0015776	nrv1	3125.69	3572.75	2678.64	0.749741	-0.415537	0.0578872	0.19627
FBgn0015777	nrv2	11272.9	9051.67	13494.2	1.4908	0.576083	0.00182324	0.0138409
FBgn0015778	rin	42325.8	43349.2	41302.5	0.952785	-0.0697773	0.634249	0.860573
FBgn0015781	P5cr	962.931	1009.56	916.307	0.907634	-0.139817	0.679817	0.888461
FBgn0015789	Rab10	4431.73	3447.43	5416.03	1.57103	0.651715	0.00305397	0.021271
FBgn0015790	Rab11	12015.9	12118.8	11913	0.983019	-0.0247086	0.950493	1
FBgn0015791	Rab14	1371.2	1289.11	1453.29	1.12735	0.172942	0.525046	0.779773
FBgn0015793	Rab-RP3	637.787	558.931	716.644	1.28217	0.358586	0.15022	0.379392
FBgn0015794	Rab-RP4	1051.25	929.477	1173.03	1.26203	0.335748	0.370216	0.646454
FBgn0015795	Rab7	5902.84	5786.05	6019.62	1.04037	0.0570946	0.662589	0.878567
FBgn0015797	Rab6	3298.84	3847.32	2750.35	0.714873	-0.484241	0.0247015	0.106437
FBgn0015799	Rbf	4286.02	4700.84	3871.2	0.823512	-0.280138	0.122542	0.33037
FBgn0015801	Reg-5	1299.17	1103.25	1495.1	1.35518	0.438483	0.650378	0.87036
FBgn0015803	rtGEF	2143.68	2103.88	2183.49	1.03784	0.0535834	0.905225	1
FBgn0015805	Rpd3	14763.7	16640.5	12887	0.774439	-0.368777	0.121571	0.328255
FBgn0015806	S6k	6405.12	5368.38	7441.86	1.38624	0.471177	0.0390488	0.149148
FBgn0015808	ScpX	1627.06	1592.38	1661.73	1.04355	0.0615034	0.459927	0.728414
FBgn0015816	Slh	1974.68	1937.34	2012.01	1.03854	0.0545587	0.770556	0.943325
FBgn0015818	Spx	2353.38	2207.23	2499.52	1.13242	0.179411	0.419129	0.692879
FBgn0015828	TfIIEalpha	1373.15	1427.92	1318.37	0.923278	-0.115163	0.512117	0.770796
FBgn0015829	TfIIEbeta	1021.82	986.874	1056.78	1.07083	0.0987313	0.691192	0.894903
FBgn0015831	Rtnl2	7.01087	6.15613	7.86562	1.27769	0.353537	0.904436	1
FBgn0015834	Trip1	13566.9	13207.5	13926.2	1.05442	0.0764448	0.590279	0.83148
FBgn0015838	Vang	8224.01	8469.36	7978.66	0.942062	-0.0861065	0.718994	0.913459
FBgn0015872	Drip	1062.94	1806.26	319.621	0.176951	-2.49857	3.04493e-18	2.47154e-16
FBgn0015903	apt	1974.08	1506.85	2441.31	1.62014	0.696116	0.0597229	0.200738
FBgn0015904	ara	3163.92	5770.97	556.876	0.096496	-3.37339	2.09268e-21	2.32442e-19
FBgn0015905	ast	1314.74	1225.36	1404.11	1.14588	0.196455	0.254337	0.525816
FBgn0015907	bl	13508.7	15032	11985.4	0.79733	-0.326751	0.142858	0.368297
FBgn0015919	caup	3228.03	5596.48	859.578	0.153593	-2.70282	4.68579e-19	4.12037e-17
FBgn0015924	crq	1483.56	1528.94	1438.18	0.940644	-0.0882793	0.835147	0.97659
FBgn0015925	csul	2045.51	1689.77	2401.24	1.42105	0.506953	0.0192517	0.0889033
FBgn0015926	dah	1353.52	1178.42	1528.62	1.29718	0.375379	0.119342	0.324644
FBgn0015929	dpa	6448.41	6189.17	6707.66	1.08377	0.116063	0.516274	0.773605
FBgn0015946	grim	2.18013	0	4.36026	Inf	Inf	0.453665	0.722903
FBgn0015949	hrg	9557.35	9425.29	9689.41	1.02802	0.0398726	0.880298	1
FBgn0016013	Faa	68.8469	79.111	58.5828	0.740514	-0.433402	0.16874	0.408591
FBgn0016031	lama	1756	1361.28	2150.72	1.57993	0.659857	0.202519	0.458407
FBgn0016032	lbm	112.99	48.0125	177.967	3.70668	1.89013	1.76516e-06	3.27345e-05
FBgn0016034	mael	363.098	71.2724	654.924	9.18903	3.19991	1.0954e-17	8.62589e-16
FBgn0016036	mei-P22	27.4205	20.7957	34.0453	1.63713	0.711172	0.463146	0.731058
FBgn0016038	mod(r)	2166.26	2162.86	2169.66	1.00315	0.00453334	0.813315	0.965909
FBgn0016041	Tom40	4906.35	3935.89	5876.82	1.49314	0.578348	0.00647031	0.0387264
FBgn0016047	nompA	0	0	0	NA	NA	NA	NA
FBgn0016053	pgc	6.91114	12.4271	1.39522	0.112273	-3.15492	0.0168353	0.0808216
FBgn0016054	phr6-4	720.88	705.931	735.828	1.04235	0.0598413	0.993212	1
FBgn0016059	Sema-1b	10577.6	13884	7271.28	0.523716	-0.933144	1.08512e-05	0.000167401
FBgn0016061	side	165.597	272.994	58.2006	0.213194	-2.22976	3.161e-06	5.63427e-05
FBgn0016070	smg	1911.85	2081.1	1742.6	0.837345	-0.256105	0.197009	0.449868
FBgn0016075	vkg	1216.49	1342.43	1090.55	0.812366	-0.299798	0.239363	0.506897
FBgn0016076	vri	3454.24	3347.06	3561.42	1.06405	0.089561	0.993543	1
FBgn0016078	wun	1752	1563.46	1940.53	1.24118	0.311707	0.364889	0.642244
FBgn0016080	xmas-1	132.929	118.989	146.869	1.23431	0.303708	0.497813	0.759641
FBgn0016081	fry	3999.8	4242.39	3757.22	0.885638	-0.175212	0.429641	0.70408
FBgn0016119	ATPsyn-Cf6	5020.01	4562.55	5477.46	1.20053	0.263667	0.185183	0.433373
FBgn0016120	ATPsyn-d	5848.54	5658.12	6038.95	1.06731	0.0939739	0.818721	0.969058
FBgn0016122	Acer	84.3819	102	66.7638	0.654547	-0.61143	0.178576	0.424019
FBgn0016123	Aph-4	84.5653	118.812	50.3184	0.423512	-1.23952	0.690844	0.894726
FBgn0016126	CaMKI	6549.41	6937.39	6161.43	0.888148	-0.171128	0.89038	1
FBgn0016131	Cdk4	3175.21	3730.56	2619.86	0.70227	-0.509902	0.0254392	0.108722
FBgn0016641	PTP-ER	1806.7	1902.7	1710.7	0.899091	-0.15346	0.422078	0.696203
FBgn0016650	Lgr1	3.0626	6.1252	0	0	#NAME?	0.253026	0.524544
FBgn0016660	H15	19.1104	32.6398	5.58089	0.170984	-2.54807	0.016385	0.0793001
FBgn0016672	Ipp	1009.12	1086.22	932.016	0.858033	-0.220896	0.254498	0.525898
FBgn0016675	Lectin-galC1	0	0	0	NA	NA	NA	NA
FBgn0016684	NaPi-T	160.842	62.6343	259.05	4.1359	2.0482	4.1712e-06	7.15684e-05
FBgn0016685	Nlp	27365.2	27006	27724.3	1.0266	0.0378715	0.714925	0.911287
FBgn0016687	Nurf-38	9835.79	10336	9335.54	0.903202	-0.146879	0.509107	0.767881
FBgn0016691	Oscp	5945.92	6065.82	5826.03	0.96047	-0.0581879	0.824457	0.972248
FBgn0016693	Past1	3567.52	4620.12	2514.91	0.544339	-0.877423	0.000150382	0.00168812
FBgn0016694	Pdp1	2988.54	1440.03	4537.05	3.15066	1.65565	0.000937689	0.00803124
FBgn0016696	Pitslre	6645.9	7973.47	5318.33	0.667004	-0.584233	0.0073821	0.0432275
FBgn0016697	Prosalpha5	6588.67	6423.74	6753.61	1.05135	0.072246	0.355663	0.634833
FBgn0016698	Ptpa	1087.83	1139.47	1036.19	0.909364	-0.13707	0.476402	0.739469
FBgn0016700	Rab1	9606.95	9383.03	9830.86	1.04773	0.0672641	0.703987	0.903864
FBgn0016701	Rab4	2323.9	2111.44	2536.35	1.20124	0.264524	0.125248	0.335521
FBgn0016715	Reg-2	125.037	196.462	53.613	0.272893	-1.87359	0.000323416	0.00330047
FBgn0016726	RpL29	48973.2	28680	69266.4	2.41514	1.27211	0.00668015	0.0397345
FBgn0016754	sba	1913.23	1976.47	1849.99	0.936005	-0.095412	0.653938	0.872845
FBgn0016756	Ubp64E	8008.42	8164.16	7852.67	0.961847	-0.0561213	0.516515	0.773746
FBgn0016762	angel	0	0	0	NA	NA	NA	NA
FBgn0016792	dmt	2641.75	2750.45	2533.04	0.920953	-0.1188	0.450836	0.720905
FBgn0016794	dos	1932.73	2069.42	1796.04	0.867896	-0.204405	0.273194	0.546706
FBgn0016797	fz2	12432.3	21988.3	2876.33	0.130812	-2.93443	1.10081e-39	4.64629e-37
FBgn0016917	Stat92E	9444.45	8888.48	10000.4	1.1251	0.170052	0.465601	0.73274
FBgn0016919	nompB	1.43453	0.688921	2.18013	3.16456	1.662	0.705802	0.904966
FBgn0016920	nompC	0.348805	0	0.697611	Inf	Inf	0.999708	1
FBgn0016926	Pino	2142.36	2876.91	1407.81	0.489347	-1.03107	3.8049e-06	6.61438e-05
FBgn0016930	smi35A	4493.11	6100.75	2885.48	0.47297	-1.08018	0.013984	0.070434
FBgn0016970	l(2)k10201	465.194	420.891	509.498	1.21052	0.275631	0.309941	0.588961
FBgn0016974	swaPsi	0.828029	1.65606	0	0	#NAME?	0.363619	0.641394
FBgn0016975	stnB	0	0	0	NA	NA	NA	NA
FBgn0016976	stnA	0	0	0	NA	NA	NA	NA
FBgn0016977	spen	17684.3	21061.7	14306.9	0.679286	-0.557909	0.272005	0.545542
FBgn0016978	snRNP-U1-70K	3649.49	3835.73	3463.25	0.90289	-0.147377	0.659765	0.877358
FBgn0016983	smid	11990.8	10650.3	13331.3	1.25173	0.323921	0.220409	0.4817
FBgn0016984	sktl	0	0	0	NA	NA	NA	NA
FBgn0017397	how	5735.29	7390.97	4079.61	0.551972	-0.857334	0.000494258	0.0046859
FBgn0017414	cag	549.3	667.008	431.591	0.647056	-0.628037	0.16492	0.403206
FBgn0017418	ari-1	3135.95	2922.07	3349.83	1.14639	0.197097	0.512893	0.7713
FBgn0017429	CG5989	850.892	654.589	1047.19	1.59977	0.677868	0.0151383	0.0748544
FBgn0017430	Nelf-E	1093.12	1111.26	1074.97	0.967337	-0.0479093	0.895837	1
FBgn0017448	CG2187	37.7155	35.3337	40.0973	1.13482	0.182461	0.812692	0.965729
FBgn0017456	Ubc84D	0	0	0	NA	NA	NA	NA
FBgn0017457	U2af38	3490.69	3860.92	3120.47	0.808219	-0.307182	0.141522	0.366014
FBgn0017482	T3dh	24.4507	11.4908	37.4107	3.25569	1.70296	0.028919	0.119263
FBgn0017545	RpS3A	106046	88159	123932	1.40578	0.491371	0.0103323	0.0561415
FBgn0017549	Ric	831.615	633.074	1030.16	1.62723	0.702417	0.0310964	0.126349
FBgn0017550	Rga	4788.86	5317.11	4260.6	0.801299	-0.319587	0.105414	0.297018
FBgn0017551	Rca1	1619.56	1421.41	1817.71	1.27881	0.354805	0.148206	0.376752
FBgn0017556	Pros28.1B	0	0	0	NA	NA	NA	NA
FBgn0017557	Pros28.1A	0	0	0	NA	NA	NA	NA
FBgn0017558	Pdk	1252.29	1419.03	1085.54	0.764983	-0.3865	0.0677631	0.218727
FBgn0017561	Ork1	1.9607	3.22379	0.697611	0.216395	-2.20826	0.390042	0.664683
FBgn0017566	ND75	4329.38	4256.91	4401.84	1.03405	0.0483008	0.973465	1
FBgn0017567	ND23	1543.84	1525.94	1561.74	1.02346	0.0334559	0.830299	0.975362
FBgn0017572	Mo25	5045.5	5579.43	4511.56	0.808607	-0.30649	0.140104	0.363594
FBgn0017577	Mcm5	5904.31	5081.09	6727.54	1.32403	0.404941	0.0386123	0.14789
FBgn0017578	Max	2156.44	1852.11	2460.77	1.32863	0.409934	0.0689988	0.221569
FBgn0017579	RpL14	41602.5	34699.2	48505.8	1.39789	0.483255	0.0240043	0.104107
FBgn0017581	Lk6	25318.3	22563.9	28072.7	1.24414	0.315154	0.314671	0.592578
FBgn0017590	klg	11.286	7.50304	15.069	2.00839	1.00604	0.616485	0.849059
FBgn0019624	CoVa	5946.98	5203.87	6690.09	1.2856	0.362441	0.120981	0.327247
FBgn0019637	Atu	4025.08	4148.09	3902.06	0.940688	-0.0882115	0.589421	0.830827
FBgn0019643	Dat	25.4295	24.9601	25.8989	1.03761	0.0532654	0.764754	0.939756
FBgn0019644	ATPsyn-b	6982.99	6658.35	7307.63	1.09751	0.134239	0.503126	0.763312
FBgn0019650	toy	17.1705	0	34.341	Inf	Inf	0.00245123	0.0177674
FBgn0019660	roX2	323.341	479.948	166.734	0.347401	-1.52533	0.00140451	0.011187
FBgn0019661	roX1	12709.6	19515.7	5903.45	0.302497	-1.72501	0.00701415	0.0413945
FBgn0019662	qm	1478.48	1280.15	1676.81	1.30985	0.389405	0.155291	0.386469
FBgn0019686	lok	2970.16	2298.21	3642.11	1.58476	0.664266	0.00437466	0.0282333
FBgn0019809	gcm2	66.5628	0	133.126	Inf	Inf	5.47748e-10	1.74618e-08
FBgn0019828	dj	0.322379	0.644758	0	0	#NAME?	0.821822	0.971094
FBgn0019830	colt	2169.41	2682.95	1655.87	0.617181	-0.696234	0.00210594	0.0156052
FBgn0019886	Letm1	2830.29	2728.29	2932.3	1.07477	0.104035	0.801468	0.958093
FBgn0019890	Smg5	6723.16	7047.5	6398.82	0.907957	-0.139304	0.337724	0.615333
FBgn0019925	Surf4	5673.89	6175.36	5172.42	0.83759	-0.255684	0.320018	0.596929
FBgn0019928	Ser8	0	0	0	NA	NA	NA	NA
FBgn0019929	Ser7	0	0	0	NA	NA	NA	NA
FBgn0019932	SamDC	1073.64	948.295	1198.99	1.26437	0.338415	0.0765973	0.238885
FBgn0019936	RpS20	38461.2	33372.1	43550.4	1.30499	0.384042	0.0982131	0.283697
FBgn0019938	RpI1	6438.77	5340.62	7536.93	1.41125	0.496969	0.0341256	0.135007
FBgn0019940	Rh6	0.697611	0	1.39522	Inf	Inf	0.805311	0.960946
FBgn0019947	Psn	3831.35	4259.73	3402.97	0.79887	-0.323967	0.16822	0.407745
FBgn0019948	Phm	2827.58	3198.01	2457.16	0.76834	-0.380182	0.0810354	0.248788
FBgn0019949	Cdk9	1113.62	1156.37	1070.86	0.926057	-0.110828	0.66476	0.879898
FBgn0019952	Orct	586.581	368.842	804.319	2.18066	1.12477	7.14958e-05	0.000882367
FBgn0019957	ND42	3207.97	3287.47	3128.48	0.95164	-0.0715125	0.6569	0.875639
FBgn0019960	CG6455	5671.91	5411.05	5932.76	1.09641	0.132793	0.556955	0.804736
FBgn0019968	Khc-73	5997.68	5499.44	6495.92	1.1812	0.24025	0.23209	0.497056
FBgn0019972	Ice	2763.35	3086.48	2440.22	0.790617	-0.33895	0.131095	0.3468
FBgn0019982	Gs1l	626.36	549.365	703.354	1.2803	0.356484	0.256822	0.527543
FBgn0019985	mGluRA	5.1974	2.75569	7.63911	2.77213	1.47099	0.105288	0.296742
FBgn0019990	Gcn2	2745.03	2478.9	3011.17	1.21472	0.280621	0.523034	0.778319
FBgn0020018	Ppox	893.414	836.288	950.541	1.13662	0.184749	0.575476	0.818841
FBgn0020224	Cbl	2924.21	2921.98	2926.44	1.00153	0.00220249	0.888523	1
FBgn0020235	ATPsyn-gamma	8377.87	8364.99	8390.75	1.00308	0.00443733	0.844209	0.981825
FBgn0020236	ATPCL	6946.39	7841.57	6051.21	0.771684	-0.373918	0.0500788	0.1774
FBgn0020238	14-3-3epsilon	80344.6	81910.6	78778.6	0.961762	-0.0562475	0.806858	0.96203
FBgn0020240	Mcr	17403	17026.9	17779.1	1.04418	0.0623716	0.682809	0.889826
FBgn0020245	ttv	2081.38	2344.6	1818.15	0.775465	-0.366867	0.0841146	0.254628
FBgn0020248	stet	1.19457	2.38914	0	0	#NAME?	0.199505	0.453898
FBgn0020249	stck	3419.28	2954	3884.56	1.31502	0.39508	0.0242532	0.104842
FBgn0020251	sfl	1614.93	1609.32	1620.55	1.00697	0.0100278	0.932722	1
FBgn0020255	ran	39787	36293.1	43280.9	1.19254	0.254033	0.129991	0.344639
FBgn0020257	ppa	11366.7	11406.6	11326.7	0.992998	-0.0101367	0.685389	0.891657
FBgn0020258	ppk	54.0933	98.1755	10.0111	0.101972	-3.29376	6.80565e-07	1.39173e-05
FBgn0020261	pcm	4250.37	4811.13	3689.61	0.76689	-0.382908	0.03715	0.143803
FBgn0020269	mspo	25.2294	45.9766	4.48217	0.097488	-3.35863	4.83717e-07	1.01677e-05
FBgn0020270	mre11	3302.97	2395.91	4210.02	1.75717	0.813253	0.000153349	0.00171777
FBgn0020272	mst	1075.86	874.562	1277.16	1.46034	0.546305	0.0260396	0.110571
FBgn0020277	lush	3.27664	5.15806	1.39522	0.270493	-1.88634	0.287036	0.562674
FBgn0020278	loco	2914.27	2521.49	3307.04	1.31154	0.391267	0.127305	0.339393
FBgn0020279	lig	31419.7	36547.2	26292.1	0.719402	-0.47513	0.00758858	0.0441098
FBgn0020280	laf	1.03776	0	2.07553	Inf	Inf	0.639136	0.863733
FBgn0020294	ko	6991.81	8156.92	5826.69	0.714325	-0.485347	0.0522767	0.182717
FBgn0020299	stumps	1361.81	1993.46	730.163	0.36628	-1.44898	6.27718e-06	0.000103495
FBgn0020300	gk	385.524	719.736	51.311	0.0712913	-3.81013	4.08379e-34	1.2312e-31
FBgn0020304	drongo	5929.75	5444.67	6414.84	1.17819	0.236569	0.438554	0.710856
FBgn0020305	dbe	2217.28	2176.56	2258	1.03742	0.0529976	0.75906	0.936141
FBgn0020306	dom	25735.8	27922.2	23549.4	0.843393	-0.245723	0.283859	0.559552
FBgn0020307	dve	1920.29	3437.99	402.587	0.117099	-3.09419	3.87278e-13	1.92762e-11
FBgn0020309	crol	30155.9	34624.3	25687.5	0.741893	-0.430718	0.0436222	0.161133
FBgn0020312	CG4050	2870.78	3284.51	2457.04	0.748069	-0.418757	0.0454178	0.165731
FBgn0020368	Vha68-1	74.7635	84.8741	64.6529	0.76175	-0.392611	0.503184	0.763312
FBgn0020369	Pros45	686.048	578.962	793.135	1.36992	0.454096	0.357939	0.63714
FBgn0020370	TppII	7184.74	8070.82	6298.66	0.780424	-0.35767	0.0460055	0.167224
FBgn0020371	Tim17b2	0	0	0	NA	NA	NA	NA
FBgn0020372	TM4SF	2.03998	1.28952	2.79044	2.16395	1.11366	1	1
FBgn0020376	Sr-CIII	0.693266	0.688921	0.697611	1.01261	0.0180831	1	1
FBgn0020377	Sr-CII	0.348805	0	0.697611	Inf	Inf	0.993917	1
FBgn0020378	Sp1	3127.35	196.183	6058.52	30.8819	4.94869	6.65709e-17	4.98196e-15
FBgn0020379	Rfx	512.269	497.718	526.819	1.05847	0.081977	0.823393	0.971781
FBgn0020381	Dredd	1656.34	1966.21	1346.47	0.684806	-0.546232	0.116429	0.319521
FBgn0020385	pug	1013.34	1262.45	764.24	0.605364	-0.724124	0.00243673	0.0176839
FBgn0020386	Pdk1	8245.76	6578.06	9913.45	1.50705	0.591726	0.0428551	0.159565
FBgn0020388	Pcaf	2536.2	2277.44	2794.96	1.22723	0.295411	0.331446	0.609375
FBgn0020389	Papss	963.328	1174.26	752.396	0.640741	-0.642187	0.00242055	0.0175786
FBgn0020391	Nrk	141.97	121.864	162.077	1.32998	0.411408	0.397241	0.671852
FBgn0020392	Nmt	4811.46	5332.78	4290.14	0.804484	-0.313864	0.203159	0.458848
FBgn0020399	Mst89B	52.1424	53.1838	51.101	0.960838	-0.0576348	0.678135	0.887692
FBgn0020407	asun	861.438	799.505	923.371	1.15493	0.207803	0.506591	0.766277
FBgn0020412	JIL-1	4524.12	4790.94	4257.3	0.888616	-0.170368	0.422564	0.696593
FBgn0020414	Idgf3	88.2027	43.1768	133.229	3.08566	1.62558	0.0851333	0.256665
FBgn0020415	Idgf2	63.1335	62.6255	63.6414	1.01622	0.0232158	0.89436	1
FBgn0020416	Idgf1	0	0	0	NA	NA	NA	NA
FBgn0020429	GluRIIB	5.58089	0	11.1618	Inf	Inf	0.362052	0.640277
FBgn0020439	fau	99.5388	196.793	2.28473	0.0116098	-6.42851	7.2836e-07	1.48372e-05
FBgn0020440	Fak56D	2571.16	2766.59	2375.73	0.858722	-0.219737	0.249194	0.519663
FBgn0020443	Elf	13192.7	13365.1	13020.2	0.974195	-0.0377178	0.740325	0.926749
FBgn0020445	E23	462.993	436.868	489.118	1.1196	0.162984	0.327377	0.605413
FBgn0020493	Dad	6989.3	6736.47	7242.13	1.07506	0.104422	0.601405	0.839301
FBgn0020496	CtBP	35740.1	38747.1	32733.1	0.844787	-0.243341	0.274377	0.548442
FBgn0020497	emb	15929	15975.5	15882.5	0.994178	-0.00842454	0.974057	1
FBgn0020503	CLIP-190	2825.05	3251.84	2398.27	0.737512	-0.439262	0.0546769	0.188423
[truncated: 13,495 more rows]
