# Supplementary material for: The transcriptional response to tumorigenic polarity loss in Drosophila
Source: eLife. 2015 Feb 26;4:e03189. doi: 10.7554/eLife.03189 (PMC4369581; doi:10.7554/eLife.03189)
Supplement: Supplementary file 4. — RNA-Seq alignment statistics. Table of combined number of 50-bp single-end sequencing reads for each sequencing replicate. Reads were considered ‘non-aligned’ if they had >2 mismatches relative to the reference genome, and ‘low complexity’ reads had multiple matches within the genome, reflecting sequencing reads from repeated DNA elements. Percentages listed refer to the number of reads for each category relative to the total number of reads. DOI: http://dx.doi.org/10.7554/eLife.03189.024 [file elife03189s004.xlsx]

## Sheet: IndividualReps
	Number of Reads	Mapped Reads	Non-aligned reads (> 2 mismatches)	Low Complexity Reads
white_rep1	47054684	35,894,609 (76.28%)	10,681,315 (22.70%)	478,760 (1.02%)
white_rep2	40193708	30,441,587 (75.74%)	9,484,628 (23.60%)	267,493 (0.67%)
white_rep3	58532467	48,435,681 (82.75%)	9,767,968 (16.69%)	328,818 (0.56%)
scrib_rep1	46536306	31,722,474 (68.17%)	13,773,056 (29.60%)	1,040,776 (2.24%)
scrib_rep2	43377434	35,072,376 (80.85%)	6,891,958 (15.89%)	1,413,100 (3.26%)
scrib_rep3	63331058	50,260,287 (79.36%)	11,471,287 (18.11%)	1,599,521 (2.53%)
dlg_rep1	40305313	28,977,100 (71.89%)	10,895,840 (27.03%)	432,373 (1.07%)
dlg_rep2	27995405	19,874,704 (70.99%)	7,863,068 (28.09%)	257,633 (0.92%)
iso42_rep1	35875740	23,494,060 (65.49%)	11,857,932 (33.05%)	523,748 (1.46%)
XL26_rep1	29149464	23,542,239 (80.76%)	4,562,589 (15.65%)	1,044,636 (3.58%)
iso42_rep2	87472275	48,803,357 (55.79%)	37,990,478 (43.43%)	678,440 (0.78%)
XL26_rep2	88373386	64,616,721 (73.12%)	20,617,775 (23.33%)	3,138,890 (3.55%)
