# Supplementary material for: The transcriptional response to tumorigenic polarity loss in Drosophila
Source: eLife. 2015 Feb 26;4:e03189. doi: 10.7554/eLife.03189 (PMC4369581; doi:10.7554/eLife.03189)
Supplement: Supplementary file 5. — Contains the number of differentially expressed genes for each genotype. DOI: http://dx.doi.org/10.7554/eLife.03189.025 [file elife03189s005.xlsx]

## Sheet: Sheet1
	Total features	Diff Expressed	Up-regulated	Down-regulated
scrib	15494	1181	676	505
dlg	15494	828	440	388
Psc/Su(Z)2	15494	1256	486	770
