# Supplementary material for: The transcriptional response to tumorigenic polarity loss in Drosophila
Source: eLife. 2015 Feb 26;4:e03189. doi: 10.7554/eLife.03189 (PMC4369581; doi:10.7554/eLife.03189)
Supplement: Supplementary file 6. — Contains the primer sequences used for quantitative PCR in Figure 7. DOI: http://dx.doi.org/10.7554/eLife.03189.026 [file elife03189s006.xlsx]

## Sheet: Sheet1
qPCR Primers	Sequence
GAPDH2 FOR	GTGAAGCTGATCTCTTGGTACGAC
GAPDH2 REV	CCGCGCCCTAATCTTTAACTTTTAC
CG12703 FOR	ATGGGCATCATCGACAACATTATC
CG12703 REV	AGCATGCGTCCGTAGGTGTAGTAG
Cp-1 FOR	TGGTCATGGAGGAATGGCATACG
Cp-1 REV	ACGCTCCTCGGTTTCATCCTGATAG
Psc FOR	AAGGTCAAGTCTCTGCTCAACTCGT
Psc REV	TCCGTTATTGGGTGATGAAGAATCT
ph-p FOR	AAGTGACTACAGACAGTGGTGCAAG
ph-p REV	AACAGAAGTACCTCCAATGTCACTG
